# Supplementary material for: A spatiotemporal reconstruction of the C. elegans pharyngeal cuticle reveals a structure rich in phase-separating proteins
Source: eLife. 2022 Oct 19;11:e79396. doi: 10.7554/eLife.79396 (PMC9629831; doi:10.7554/eLife.79396)
Supplement: Figure 4—source data 1. [file elife-79396-fig4-data1.xlsx]

## Sheet: Fig 4-source data 1
1	1	Table S4: Cell type consensus expression profiles. Values listed are transcripts per million.		New Gene	Gene of	Sequence Name	Uniprot	Reference Uniprot ID	AA Sequence	Protein		GeneMania		Hendriks	Hendriks	Hendriks	Temporal		L4 Molt-Raizen	FC L4Leth/L4	FC L4Leth/Adult	FDR L4Leth/L4		Tissue		collagen	ParaSite	Unstructured (absence of any clear domain aside from coiled-coil, SS, or TM) that are SS and/or PM		% of protein residues in		# of IDRs	Total Disordered Residues	Total Residues In IDRs	Total Residues	Total Non- IDR Disorder Residue (%)	Total IDR (%)	Total Disorder %		PsPredictor		PLAAC (Prion Likeness-LRR-PLAAC Score (from JFK-2020-12))		8-feature sum	protein-water	protein-carbon	hydrogen bond (long-range)	pi-pi (long-range)	disorder (long)
2	2	gene_id	symbol	Name?	Special Interest					Length (residues)		PPI Interactions (# of independently experimentally-verified interactions are indicated. The number includes multiple lines of evidence for interactions between two proteins and does not necessarily reflect the total number of proteins interacted with. 'n' indicates within an network of 3 or more proteins. Interactions without an 'n' reflect only interacting pairs of proteins not within a network.		class	amplitude	phase	Interval		FC L4Leth/L4	FC L4Leth/Adult	FDR L4Leth/L4	FDR L4Leth/Adult		Enriched (1.5 fold enriched relative to all other tissues and 25 or more transcripts per million read	.		SS	Manual inspection		Low Complexity Regions (calculated by Jess Knox using NCBI's seg program)		08-2020 (Levon Tokmakjian)	08-2020 (Levon Tokmakjian)	08-2020 (Levon Tokmakjian)	08-2020 (Levon Tokmakjian)	08-2020 (Levon Tokmakjian)	08-2020 (Levon Tokmakjian)	08-2020 (Levon Tokmakjian)		Script run by Xiaoquan Chu from the Jianfeng Pei Lab (University of Chinese Academy of Sciences)		12-2020		12-2020	12-2020	12-2020	12-2020	12-2020	12-2020
				Sup Table 1	Fig4A, Sup Table 1				Fig9			Fig5C		Fig4A		Fig4A				Fig4A				Fig4		Fig7	Fig4A etc	Fig4A		Fig7A							Fig7B			Fig7C		Fig7D		Fig7E
76	144	WBGene00000033	abu-10		special interest	F35A5.3	Q20002	Q20002	MFRSAFSIFAIVALALSAPTLREKRQACSCAPVQQQPSCCQQSTINVQVQYTQVQQAPAQDPCACQPQQQQPACNCAPVQQDPCACQPQQQQPACNCAPVQQDPCACQQQQPSCDCAPVQQQPACDCQPQQQPACDCAPVAQQPACDCQQNPSCVTCIQIEIRQQQAQQPACDCAPVQQNPCCQQAQPACDCAPVQQQPSCDCAPVQQNPCCQQAQPACDCAPVQQQPACDCAPVQQNPCCQQQAQSTCDCAPVQQNPCCQQAQPACDCAPVVQQNPCACQQAQPSCDCAQQAQPTFQVQVQQAQPINQCVPACQPACQSSCTASYTNQQSQHSSATTSCDANQCVCQRGYVKCAEQTCCLRYRYTNRKAKRSIA	375		n14		osc	3.15	259.56	6		71.0598	64.7106	0	0		P			SS	1		67.2		1	375	375	375	0	100	100		0.9132		12.64		90.0761	89.3662	69.0346	67.1408	88.17	72.6971
77	145	WBGene00000034	abu-11		special interest	T01D1.6	P91419	P91419	MNTKFSILFSLLAVSALAVAAEENVFLRARRQSSCGCAIPAAPQCNCQPAQTNTAQQSCSCAQAQQPSSCGCAQQYQQQQCAPTCQSSCEQSCVAQQQPIAQCQSSCSSTCQSACAQPVQLQQPAQQQCQQDCQAACPQQQQPQQQCQQQCQTTCQSDDQYSQQLIQQQTYAQPGQIPAYTGRSEYNTAPPQQQQASQCNTCQNSCLNTCQQQQQPVQQCQSSCDQSCQPQCATPSGSAYNQVNYQPQAQNNYQTNNNYQQPGAIPSYQGASQTAAPTYQPYRDTNVQVGGTISQCNTCQTQCNQECQVQQTPVNQCAPQCDAQCQPACSPAAPAAPVQTQQQIQLTINVPVARQSPQCQPQCEQSCNTQCIQQQQPISQCQPACQQSCSASCRK	395		n54		osc	3.15	239.5	6		40.3886	39.8643	0	0		P			SS	1		68.3544		1	395	395	395	0	100	100		0.9928		28.693		92.395	91.5991	72.2525	41.4616	97.9268	45.4729
80	148	WBGene00004174	abu-14		special interest	ZK1067.7	Q23390	Q23390	MAARRAASILLIAVLALSSTFVFADEETVKNETGLALSRAKRQCCSSNSNSCCGNNNNVQCIPVCLQQCQSSCQTSQCIQQCQPACNQQCGGNNQVILLPQTNNCNQCQQQCISSCATPICAQSCNNQCSSSCGNSAPQIVVLQPQQNQCGSCQSSCQQTCPTCNCQSACAPACGGNNNNQQIIVVQQDNSCSSNCNNQCSSSCSTPICIQSCQSSCQQACQPTCQPQCMPSCSSSCTSNQAPIVIVAQQGDSCSNSCSNQCQSACPTPICVQQCNSQCQSQCSNSCSGNSCNQQQVIVLQQQDNCQNQCQSSCMNTCQSSATVLQCQPICQQTCQNTCQQAAQIVVPCQSSSSGCGCSSGYSQCGGSCCRRR	373		n40		osc	2.6	199.01	5		11.9806	103.644	0.00131399	0		P			SS	1		72.6542		1	373	373	373	0	100	100		0.9731		9.41		91.9799	79.4792	78.1823	91.7956	98.6269	38.8013
81	149	WBGene00004099	abu-15		special interest	C03A7.4	O16500	O16500	MRFTSLSIAFLACALVVSGSAIREKRQCGCAQPQQSQCSCQQVQQTQSCSCQSAPVQQQSPSCSCAQPQQTQQVQVQSTQCAPACQQSCQQQCQASPSVSQCQPQCQQQCQAQCTPMYNPPTTTTTTQAPVVQYQQCQPVCQQQCQSTCVQQQQPAAQCQPQCQQQCNVACDSPSTTTQAPQVIQIQLEIQQAQAQCQPQCQQQCQSSCVQQQQQSNQCEPACNTQCSDICQQTAQATQQVYNQNMNQNTNTQMYNPYNTNTNQNANCAPACQPACDNSCTSQQTQPMYQPYDTTTEAPAQVIQIVLQTSVAQSSQCAPQCEQSCQQQCVQQQQPAAQCQTACQSSCSNSCQAAQPATTACQQSPQQSSCSCQANYSPCGNGQCCRRK	388		n59		osc	2.7	262.16	6		367.137	276.845	0	0		P			SS	1		72.4227		1	388	388	388	0	100	100		0.9936		26.881		90.027	89.86	76.3965	16.6175	97.2537	36.5488
85	153	WBGene00000029	abu-6		special interest	C03A7.7	O16501	O16501	MRFTSLAIAFLACALAVSGSAIREKRQCGCAQPQQSQCSCQQVQQTQSCSCQSAPVQQQSPSCSCAQPQQTQQVQVQSTQCAPACQQSCQQQCQASPSVSQCQPQCQQQCQAQCTPMYNPPTTTTTTQAPVVQYQQCQPVCQQQCQSTCVQQQQPAAQCQPQCQQQCNVACDSPSTTTQAPQVIQIQLEIQQAQAQCQPQCQQQCQSSCVQQQQQSNQCEPACNTQCSDICQQTAQATQQVYNQNMNQNTNTQMYNPYNTNTSQNANCAPACQPACDNSCTSQQTQPMYQQYDTTTEAPAQVIQIVLQTSVAQSSQCAPQCEQSCQQQCVQQQQPAAQCQTACQSSCSNSCQTAQPATTACQQSPQQSSCSCQANYSPCGNGQCCRRK	388				osc	1.51	262.7	6		173.225	156.726	0	0		P			SS	1		73.1959		1	388	388	388	0	100	100		0.9936		26.83		89.9877	89.6414	76.927	14.3012	97.1285	37.0818
86	154	WBGene00000030	abu-7		special interest	C03A7.8	O16502	O16502	MRFTSLAIAFLACALVVSGSVIREKRQCGCAQPQQSQCSCQQVQQTQSCSCQSAPVQQQSPSCSCAQPQQTQQVQVQSTQCAPACQQSCQQQCQASPSVSQCQPQCQQQCQAQCTPMYNPPTTTTTTQAPVVQYQQCQPVCQQQCQSTCVQQQQPAAQCQPQCQQQCNVACDSPSTTTQAPQVIQIQLEIQQAQAQCQPQCQQQCQSSCVQQQQPSTQCEPACNTQCSDICQQTAQATQQVYNQNMNQNTNTQMYNPYNTNTNQNANCAPACQPACDNSCTSQQAQPVYQQAQPTYQVQQTTAAPMYDPYNNQGSANCAPACQPACDNSCTSQQTQPMYQPYDTTTEAPAQVIQIVLQTSVAQSSQCAPQCEQSCQQQCVQQQQPAAQCQTACQSSCSN…	438				osc	2.46	257.07	6		228.028	199.569	0	0		P			SS	1		68.9498		1	438	438	438	0	100	100		0.9913		26.978		92.223	92.4908	77.5166	25.8069	97.9268	41.098
87	155	WBGene00000031	abu-8		special interest	C03A7.14	O16511	O16511	MRFTTLAVAFFACALVVSGSVLREKRQCGCAQPQQSQCSCQQVQQTQSCSCQSAPVQQQSPSCSCAQPQQTQQVQVQSTQCAPACQQSCQQQCQASPSVSQCQPQCQQQCQAQCTPMYNPPTTTTTTQAPVVQYQQCQPVCQQQCQSTCVQQQQPAAQCQPQCQQQCNVACDSPSTTTQAPQVIQIQLEIQQAQAQCQPQCQQQCQSSCVQQQQPSTQCEPACNTQCSDICQQTAQATQQVYNNNQNMNQNMNQNTNTQMYNPYNTNTNQGSANCAPACQPACDNSCTSQQAQPVYQQAQPTYQVQQTTAAPMYDPYNNQGSANCAPACQPACDNSCTSQQTQPMYQPYDTTTEAPAQVIQIVLQTSVAQSSQCAPQCEQSCQQQCVQQQQPAAQCQTA…	445		n25		osc	2.96	257.99	6		165.861	148.064	0	0		P			SS	1		70.7865		1	445	445	445	0	100	100		0.9966		30.699		92.3532	92.7978	78.1823	27.777	98.2117	33.8909
10454	10512	WBGene00010830	appg-1	new	special interest	M02G9.1	B6VQ93, O17970	B6VQ93	MGRSNSLRLLFLFCLLLALSTAASRRLKRQCGCSNFCNCQQQPVFFAQISLPACSCQQAPICQPQCPRAEINSDCSATCVRACIPSCSKSTGNTFACSTTCESTCDKTCASAAQQAMSHIQVSPPNPQPLVPIAAAPTVDDSCQNVCQNVCQGACVSQNSPPAVCQQTCRQSCQFGCATNEQLPTTSSTSTNAPTIKITLNINDAYFDSNCAPKCTQSCHSQCISQGNPAASCSNSCNTECSDKCSTRPVQAQVQQIQPQQVQITIPQTCQSRCENRCLSTCTASQPSVCAPSCSTACQLSCDSIGAATAPQSTNPTPVEVRALCTPTCMPQCLPSCTATTTTTTTQTPYIQTLAPAPAPAPVQIQIIQKQCVPSCMPACQPSCTNPVPLTTQAPVPVV…	909		n13		osc	2.73	166.19	4							P			SS	1		24.483		1	909	909	909	0	100	100		0.9983		9.796		95.1584	91.184	92.508	9.93859	69.5185	15.2149
5091	5153	WBGene00008559	appg-2	new	special interest	F07H5.8	Q19182	Q19182	MKTNIILLLIVIGSYLVDSEQSLITRAKRQCPCAQLSQKSKCNCYPIGSGMQRCKCSNEPQSSGCSCANKAQTSVCQPSCQKSCVDSCVRNSHQPQLLCDKTCQFTCNKACTPSTSTSSSSNFPPIKVVVNQQTKASQCPQACAQSCANSCTAQPNKSYCIDMCIKSCQPTCVQAAVSINVKEFMRTSTTTLAPSRSCVSACQPTCDAQCINVMKRYEVIIQKMPLAQKCPSQCQPTCSPQCIQSVTVSIQTTAQPTTASCIPACQPACTPQCVQAVTTTETCIPACQPACQPQCVERQLQIQIVTSQATQATRAPETCIPACQPACQPQCVYQYLSSGSSGISTVPPVTKVCISICQPACDPGCVAIYTTTPAPLHCVSQCQPACLPSCTDTFTTTIS…	835				osc	3.02	205.93	5		14.7423	18.8361	0.000233896	0		P			SS	1		12.4551		1	788	778	835	1.1976	93.1737	94.3713		0.9922		9.6		89.6807	81.7858	91.6114	12.1051	20.2506	14.6794
737	804	WBGene00015218	B0507.1		special interest	B0507.1	Q22886	Q22886	MRSRRLVILSILLFLIGVVSARTASGRGCTHSMQCGRGFFCQEGACRKDSCSNDLQCDEGEECRPGNVNGRQKSGCFKSLVPKSALGGTSEDFCPGGGALVLSPTGTLTICDLTEDCPSTHICNPVHGVCCTKLPTCPKTKKTMVNFITGKPIMCQFKQGRVMPCPENGFCETTTGFCCVPGVDVEPPVVVTRAPAIIENERPWRGQVCSPQSGCSGGAACICGARGNCMCECATDFGYTLASDGKTCQRVRRRLKEKCKTDMECSAAFSECSSGGCRCKRGFKRNGDGGCEPLEYRCVNKAAPLKRDEKLITCSLKNSLLSSVSTSFRSLKKSENGSDINDAEFERLMKGIQNGTLLDFGNERDDCPDEHYCVPVFDDASKPGYYKGFCCPSPSEIRP…	615		n15		osc	1.73	153.95	4							P			SS			12.8455		0	20	0	615	3.25203	0	3.25203		0.9175		-23.454		87.4429	51.8226	81.7662	94.7187	35.7775	47.2759
3280	3342	WBGene00000503	cht-1		special interest	C04F6.3	Q11174	Q11174	MLLGKFLLVASFILPIAYTWTGATIRNHPADVVAARNKITSRSVARSEPTNSYIRPCYFTNWAQYRQGRAKFVPEDYTPGLCTHILFAFGWMNADYTVRAYDPADLPNDWAGEGMYRRVNKLKVTDTQLKTLLSFGGWSFGTALFQGMAASSASRKVFIDSAITFVRTWGFDGIDIDWEYPSGATDMANYVALVKELKAACESEAGSTGKDRLLVTAAVAAGPATIDAGYDIPNLAPNFDFILLMSYDFFGAWASLVGFNSPLYATTELPAEWNGWNVDSSARYWNQKGMPKEKIIVGMPTYGRGWTLNNASAINPGTSGSPAKITQYVQEAGVGAYFEFCEMLANGATRYWDSQSQVPYLVQGNQWWSYDDEESFANKMAYVKREGYGGAFVWTLDFD…	617				osc	1.81	116.41	3							P			SS			12.8039		2	127	102	617	4.05186	16.5316	20.5835		0.4966		-5.72		21.6704	74.591	8.51388	16.2122	58.3296	16.0648
3281	3343	WBGene00011757	cht-2		special interest	T13H5.3	Q22468	Q22468	MRFVMWMWLFVVWITVLFGVSNGGILDRSCGRRRVGYITSWGKHPFRDDQAEKLTHLVFAFFVVDSDGSVKLEGDAAKARLEHVKEVASRHPDLKLLYAVGGWENSQYFSVLTADHSRRSILISNFVKVIKEYGFDGVDIDWEYPVTGGAVEGTPADRRNYVNLMRELRNELRDLESETGKSYLISFAGAAGHWVLKPGYDLQQLMKYCDFVNVMSYDYFGAWASKWGAYTGPPAPLQFAMPKKFSGRMNVHATMKDYSCQIKATDKINMGVPFYGRFWKNVGDAVDSTDDMWRTATATNSEGTKFEGGDVQWRDLHEKFDTTKTKFHSGSKTPFIWLSEQKTFVGYENAESLKHKVDYIVENNIGGVMIWAIDFDDDQGTLLNSAAAESICTTSTKSF…	626				osc	2.15	142.59	4							P			SS			0		1	62	33	626	4.63259	5.27157	9.90415		0.7259		-14.266		57.4969	73.8172	50.5625	74.65	73.6699	41.7416
1354	1421	WBGene00007425	cht-5	new	special interest	C08B6.4	Q17816, Q65ZB0	Q65ZB0	MTRIKSVILTVFLIFAHNSIVSAVDYGNASSCPKAAKYGTGPPESCTQPTDPNNMPASELESWFTREMFEDLFPFANLGWGPSSCWPYSYDAFKIASRYFPEFGTSINVNNTVYTADENKKRDLAAFFAHAVQETGENNIALYDTLSDQDASNCFYRGGFYNWFEGGPTSSFLDPKTPGYTPADGNSCASAGLYCSASDQITYFYPCSNSTISNTAAPYKGCYFGRGAIQISYNYNYGQFQDWLRTVNIKVDLLKEPNLVMTKMDPPLAVLASLWFYMTPQPPKPAMHDIVMGNWNSGAKNAAAGYDGPIFGPTSLIINNECSGEDPTNPGGPGESRRIKAFKWFCGYFDTPTGPEATLSCKNMPVPLDQIFYNLSYQPDWTSTWKDVPCTCAPASYGG…	447				osc	2.07	125.71	3							P			SS			0		0	26	0	447	5.81655	0	5.81655		0.2854		-0.148		51.3412	78.3616	3.8762	85.5809	93.7436	55.4041
9581	9640	WBGene00010573	chtb-1	new	special interest	K04H4.2	P34504	P34504	MLRNLILITLLVASGHGQTPVIGGTCKLGTADVQIGGKQTQFFLKCETTADSAEGEGVWVVKSRAAAAPSSVPSVPAENTQPQQHPKARKPASPNICEQDNGARESEVCAVSATCLQAHNDFPSSYLQCDQTTLRWVRKSCQENFLFNFEQQTCIVPKRMSSLSRQQASGLVCTFSSCSNSNPCSVGTCNNGYCCSSGSNSGSAIIVGGGSSNCVGCQNAPQIITIPQNSCPGGGYSVGGCSSGYCATGYSCIQNQCCPSYNSAPRISVYTCPSGGNAVGACMSGRCASGYTCSNNVCCPQTTTTNPFVCPDGTQAAGGCVNGQCGTGYTCSNGLCCAGTSTTVKCLDGSDAVGACIPSCTGDGCGGVQVSYYCGSGYTCTTGNICCPINSCPNGGEVL…	628				osc	2.53	129.98	3							P			SS			9.87261		0	67	0	628	10.6688	0	10.6688		0.9508		1.721		91.7686	59.1697	81.4026	98.4058	99.3098	13.9204
5840	5901	WBGene00017754	chtb-2	new	special interest	F23F12.8	P46504	P46504	MRTMHCFLFILLFCLGQVFTDVIFTSERCNRVTYGLRTVNGDPSRYKQCGPSGRVWIVPCAPQMTFDPEDRVCKERLDSRIVKPMRKYETSRTIITTPAPIPSSYPVSAEVIAPGAPAASHAAPEEFVFSTIRPKSRKPKAKTRGKFRKTTTAMIQTTTPMTVESFESMEMTTTPKIVIFASKKNMNNTNRSGESRTQLIRNRNRERGNAPAFTRPGRVRTTTPMSVTHATRFVPGIQHKVTVAPKEVQGMPHTLAPYEKMDRRPDSFGVEELTTMTPEYTVRYNGQTMTENEFLNQLLHIVQHQKTVSERQQQEKFEKMEQERLRQEKEEKARELERRRKLEESETARQAELDRQATIYAEQERMAMERNRELERIRLEEKKRENERVRQEEIAMEIS…	980				osc	0.6	140.28	4							P			SS			21.4286		3	614	583	980	3.16327	59.4898	62.6531		0.2251		3.85		82.083	85.1412	90.3439	8.46229	4.03586	20.9015
3886	3948	WBGene00007103	crm-1		special interest	B0024.14	G5EBZ2, G5EEX3, G5EF34, E1B6S3	G5EF34	MQLVVCVFLLLFSFVNFLRTEQSERMHDDCLKAICPLVFHKGCPSDSQLITVSPAPGNCCPPPGSCHCDQKKCVPSVPTCTKEERLVMVEKGSDIPGKCCAYYECHKKEKKCENVHCPPMFQDEEECPPDSIRPPESISKESCCPIRQSCKCRGSICRPAQCPDGKVVNVTKKGTGFPGRCCDKWECVDAELSKAKCNHSGIERQPLETWHVSDCESCQCIRGVSVCNKMTCPKVNQECTWIGIPTGECCPVCLGCQTDNQTKLERGATWQKDDCTSCTCSELGAHMCEKYMCKTDCENPRKVEGQCCPVCDEPTIIRPPATCPSLELCSLRCANGLRRDNIGCYVCECLPDEVPTNPRCRELNDENCEKQCAHGYLKDEDGCTVCKCSKCPPLHQCHK…	900		n23		osc	0.65	23.79	1		1.72654	1.46316	0.00757271	0.00123484		P			SS			8.88889		1	68	46	900	2.44444	5.11111	7.55556		0.9008		-18.492		92.6259	60.8008	92.9207	90.2972	13.9204	76.0771
6098	6159	WBGene00017937	F30H5.3		special interest	F30H5.3	Q09983	Q09983	MRNWFILLLLAGGTYAVEQKPICRIGDGCDTSGCRIPTEGDKCDEEMTIDSIYCDLATNKTDTHENAFLICNLVKKEIERKICPKSQFFIDGKCRTGNVRYKRQGVAGSGRVGDFCSFNTDCLTGMFCSTGSCTCLSNFVAIQGYCYLKKNPGESGCQYAEQCSAVWPESRCEKSRCECPEDVNGIPYVQAKTRDGVVCVLHSGEDGDPVPKCPLPEYDDDLLTMPVSQLRNPHMTDPDDADIQMGEHINPLQFCSSQSTDYTTFIANGGGACAYATDANNAQEGDGIYIADIYDCVTSTTSMANVKTAMEGVYDIHPASDGICCPNRAFTCIQPKREADSGSSAPAGVRPRWWYNAVTGTCEQFMWDPWDETEMQSPNNFKTREHCESYCRDTCKRGS…	1599		n25		osc	2.71	121.07	3							P			SS			6.44153		0	39	0	1599	2.43902	0	2.43902		0.9352		-3.911		97.2587	92.7978	91.6753	96.114	99.4154	6.12135
8081	8142	WBGene00009096	fipr-1		special interest	F23H12.8	Q8I4K6	Q8I4K6	MNAKLLILVSLLVICAFVAETDAQYYGYGYGGYGYPSSYYGYGSYYGYGYPYYGGYGYYGKREAGFGPSQQQNNQ	75				osc	2.59	336.44	8							P			SS	1		48		1	51	46	75	6.66667	61.3333	68		0.5199		15.776		58.2486	25.6988	13.0115	94.397	94.6819	66.7281
8082	8143	WBGene00008245	fipr-10		special interest	C50H2.12	Q7YX54	Q7YX54	MNAKFLLCVLALAICSIVQETSAQYYGYSSYYPSYYGGYGLGAYNGYYGGAYGYGGYGYYGKREAGFGPSQQAN	74				osc	2.31	311.1	7							P			SS	1		50		0	15	0	74	20.2703	0	20.2703		0.5734		11.149		58.0201	22.0437	11.6581	92.9526	95.2346	64.2938
8083	8144	WBGene00008244	fipr-11		special interest	C50H2.10	Q8WQG0	Q8WQG0	MNAKFLLCVLALAMCSIVQETSAQYYGYSSYYPSYYGGYGPGAYNGYNGGAYGYGGYGYYGKREAGFGPSQQAN	74				osc	1.7	295.48	7							P			SS	1		50		0	36	0	74	48.6486	0	48.6486		0.574		13.513		63.2793	26.8902	17.9317	91.4616	95.4409	70.0639
8092	8153	WBGene00009097	fipr-2		special interest	F23H12.9	Q8I4K5, B5U8M6	B5U8M6	MNAKLLILVSLLVICAFITETDAQYYGYGYGYPSSYYGYGYGNYYGSYPYYGGYGYYGKREAGFGPSQQNNQ	72				osc	2.34	328.42	8							P			SS	1		47.2222		0	27	0	72	37.5	0	37.5		0.9056		10.097		54.6426	24.4461	9.35888	92.3925	92.8126	77.6026
8104	8165	WBGene00007541	fipr-4		special interest	C12D8.14	Q7YTS3	Q7YTS3	MNAKFLLCVLAIAMCSIVQEASAQYYGYASSYYPSYYGGYGYGANGAYGGYGLGSAYAGYYGKREAGFGPIQN	73				osc	2	296.78	7							P			SS	1		57.5342		0	12	0	73	16.4384	0	16.4384		0.3419		7.608		55.8143	20.1204	12.3164	88.9511	95.8266	66.7281
8106	8167	WBGene00007544	fipr-6		special interest	C12D8.17	Q7YTS0	Q7YTS0	MNSKFLLCVLAIAMCSIVQEASAQYYGYASSYYPSYYGGYGYGAYRAYGGYGLGSAYAGYYGKREAGFGPTQN	73				osc	1.13	290.4	7							P			SS	1		57.5342		0	11	0	73	15.0685	0	15.0685		0.8647		6.431		52.4662	16.2122	12.3164	88.9511	95.8266	65.1363
8107	8168	WBGene00007543	fipr-7		special interest	C12D8.16	Q7YTS1	Q7YTS1	MNSKFLLCVLVIAMCSIVQEASAQYYGYASSYYPSYYGGYGYGAYGAYGGYGLGSAYAGYYGKREAGFGLTQN	73				osc	2.56	311.67	7							P			SS	1		57.5342		0	11	0	73	15.0685	0	15.0685		0.7473		5.99		51.862	16.2122	16.0919	88.9511	94.8858	66.7281
8109	8170	WBGene00044175	fipr-9		special interest	C12D8.19	Q564Z9	Q564Z9	MNAKFLLCVLVIAMCSIVQEASAQYYGYVSSYYPSYYAGYGYGAYGTYGGYGLGSAYAGYYGKREAGFGPTQN	73				osc	1.52	308.24	7							P			SS	1		57.5342		0	11	0	73	15.0685	0	15.0685		0.347		5.658		47.3692	16.8632	12.3164	86.8435	94.4387	62.0437
16019	16038	WBGene00020599	idpa-1	new	special interest	T20B6.3	O02049	O02049	MQNVFWYFLSTKALVTVALLGTISFAQEDTTSSPEEDPLAPQNDDADLLLKPLIAKDPRTRGQRGPFAAMTGSYGRGGYGGSGGGAFGGFNGGYGQGGYGGGGDFGGGMGGGGYGGGGYGGGGDGGGGYGGYGGGGYGGMGGGPGGYGMGGYGGGGGGGGDFGGYGGGGMGGGGYGGGGDGGYGGGGFGGGGMGGYGGGMGGGGYGGGGMGGGGYGGGGDGGYGPSGGYGGGYGPGGGYGMGGGGGGGGCPNGECRGKK	259				osc	1.45	173.38	4							P			SS	1		68.7259		1	259	259	259	0	100	100		0.9979		23.323		88.8922	1.51805	49.2901	99.2017	99.6365	21.1963
5089	5151	WBGene00008557	idpa-2	new	special interest	F07H5.6	Q19176	Q19176	MNSSLLVAILLIIPTIVQSCGFGGFGGYGLGLGLGCGGGFGGFSGGYGLGYGGGFGGYGGGFGGYGLGGYGLGYGGYGMFGSGYGGGCGYSMIGGCFGKKKK	102				osc	1.54	205.82	5		2.45039	2.90945	0.00149576	0		P			SS	1		78.4314		1	99	84	102	14.7059	82.3529	97.0588		0.991		9.468		70.42	6.17784	32.0757	97.3176	97.5092	59.7765
12681	12709	WBGene00011103	idpa-3	new	special interest	R07E3.2	Q21814	Q21814	MRRSVLILSTCALIALGQDWGGGGGYGGGGDMGGYGGGGYGGGGDMGGGYGGGGDMGGGGYGGGGDMGGGYGGGGDGGYGGYGGGGYGGGGDMGGGYGMGGGGGGDGGYGGGGYGGNMGGGNMGGGGGYGSYQGGPQQPMGGQQGGYGGQPYGGGGQGGWPPMPN	165				osc	1.87	211.66	5		1.56539	1.55667	0.00361203	0.001293		P			SS	1		84.2424		1	163	150	165	7.87879	90.9091	98.7879		0.9885		31.5		85.043	3.36035	43.1516	98.9659	99.4301	32.9108
1153	1220	WBGene00015458	idpb-1	new	special interest	C04G6.10	Q95QY1	Q95QY1	MFKLFIFSTLILALGAYYGQVQAAVLPVSSTEVALVRSSASTTSSSETSIDTLGSSRVKRQGGCGCCGCGCGCCGCGGGGGGCGCCCCRPRCCCCCRRCCTCCRTCCCTRCCTCCRPCCCGCGCGCGCCGCGGGGRKRRSLQNLRIDEANRALGIKRRPTKGGDNC	166				osc	1.64	213.58	5							P			SS	1		52.4096		1	166	166	166	0	100	100		0.8945		-21.651		60.3807	11.8251	49.2901	89.8944	81.5181	52.7733
2001	2067	WBGene00016153	idpb-2	new	special interest	C27A2.5	Q18238	Q18238	MNKLVCSTFAILAIIAISQVQSAVLPVSSKEVALITSSASTTSSSETSIDTLGSSRVKRQGGCGCCGCGCGCCGCGGGGGGGCGCCCCRPKCCCCCRRCCTCCRTCCCTRCCTCCRPCCCGCGCGCGCCGCGGGGRKRRSLQNLRIALANKIEGIAKVVKGSAVEASVMNALAPVNDATVEEKKDVIN	188				osc	2.21	225.53	6		10.438	15.0716	4.55129e-05	0		P			SS	1		48.9362		2	183	181	188	1.06383	96.2766	97.3404		0.8964		-25.784		51.862	10.7713	41.6581	82.5129	80.3144	38.8013
1160	1227	WBGene00015457	idpb-3	new	special interest	C04G6.7	Q17641	Q17641	MSKIAYSTLAILAIIAISQVQSAVLPVSSKEVALVTSSTDASTTSSSETSIDTLGSSRVKRQGGCGCCGCGCGCCGCGGGGGGCGCCCCRPRCCCCCRRCCTCCRTCCCTRCCTCCRPCCCGCGCGCCGCGGGGHFLKSTAMARPKPLIEEKAKKQENDEKKNREASRNCCDLASVEVRRPNFADYNYRQELPTIQR	197				osc	1.46	227.77	6		7.21372	6.93114	4.55129e-05	0		P			SS	1		53.8071		1	197	197	197	0	100	100		0.9491		-24.557		56.48	14.5173	50.5625	79.9165	85.6915	47.2759
15354	15374	WBGene00011313	idpb-4	new	special interest	T01B7.8	Q22048	Q22048	MTTSTLAILLAIGTFIAVSQVQSAVLPVSSTELATVGTDVSTASTAIDTLGNSSSRVKRQGGCGCCGCGCGCCGCGGGGGGCGCCCCRPRCCCCCRRCCTCCRTCCCTRCCTCCRPCCCGCGCGCGCCGCGGGGRKRRSLQNLRIDDANRALGIKRKSSKADRC	164		n3		osc	2.63	230.55	6		20.1846	21.8604	4.55129e-05	0		P			SS	1		45.7317		1	164	164	164	0	100	100		0.8971		-22.369		57.7696	11.4542	46.7207	89.8944	88.17	47.8482
12895	12923	WBGene00011266	idpb-5	new	special interest	R13H4.8	Q7YWV7	Q7YWV7	MQSIRFTLSLIAILGLSYLVQAHPLSSREALKSSETTDLALPGSHETTEVALPDVKTTDIDTLGESNGRVKRQGGGCGCCGCGCGCCCCRPRCCCCCRRCCTCCRTCCCTRCCTCCRPCCCGCGCGCGCGCCGCGGGGRKRRSLQTLKIKLAEKVQREARQIEQIPETIAPVEITENVETPETVEENKPEEVETATQWPEPVYELVTETWAH	212				osc	2.58	232.65	6							P			SS	1		42.4528		2	174	156	212	8.49057	73.5849	82.0755		0.9257		-31.053		50.5871	8.59985	46.7207	75.8217	61.1373	58.2756
18507	18514	WBGene00012942	idpc-1	new	special interest	Y47D3B.6	Q9U2B8	Q9U2B8	MFRLTICATLLAFTAAQVPVAPLYSACSAAVPCAAPAVCQASVCIPTAAAPPMMMAPPAPLPAYAPAPLPAYAPAPLPAPVFAAPAPAPVFAAPFAAPPAPVIAAQPALGCAAPCLGAAQCVAGACACANPAVVYSPVIGCQPAIPVAPAPVVAGRLIPQALPGSPCEPGVECTGGSVCSVGVCLCPPELIQEGTVCVARTIYGVVPPPVIPVAPVIPVALGAPCAAPVAPVYASAAPACVPGAVCSAGVCQCAGAYEPLQGACVRRRL	269				osc	2.8	215.31	5		9.96481	14.4905	0.000139134	0		P			SS	1		56.5056		0	0	0	269	0	0	0		0.7764		-5.845		48.622	54.7949	28.2682	16.2122	70.8843	24.2741
6587	6648	WBGene00018292	idpc-2	new	special interest	F41E6.11	O16463	O16463	MHSAIGLLLVIASASQAQVLSLNCATPPCPEPMPVCATPPCPPQYAPLPPPPMPAPAPAYNPYPCANPPCIVVEPMPVAPPAPAPAYNPYPCATPPCPLPYIPEPVAPVPAPAPVYEPYACAAPPCPPPTPVYEPYACAAPPCPAPVAPQPVIQHVPVPVPVQVPVPIRVPVPVPVPTPVYQPTYCAVPPCPAPAATPVYAQPAPRPMPVYAPAPACAQPPCPAYNPYGYQGTPGYAPAYNPYSYVLRSPVAAAPGYAQGYAPAYAQGYAPAYAPSYAPAYAPSPFRRAMYLLGSNKGKKAAAAAAAATEEKKKTA	316				osc	2.8	227.66	6		39.3546	90.5309	0	0		P			SS	1		75.6329		1	316	316	316	0	100	100		0.9077		12.952		90.4913	87.3004	36.6372	96.5856	91.1275	85.1437
15611	15631	WBGene00044011	idpc-3	new	special interest	T06E4.12	Q5FC67	Q5FC67	MSSSVFALLFAGLALSSAQVAVNGPFMGRYYVAAKPVLAPGVAPVAAPVLAAAPTVLAAPAPLLAPPAPLLAPPAPVLAAAPAFAAPAPVFAAPPAPVLAAPAPFLAPPVPPVAPIVSAFAPRPVLAAPAFAPAPILAPRPVLAAPAIPAFAPAPLLAPRPVLAAPAIPAFAPAPIIAPRPVLAAPAIPAFAPAVPAAIPAYAPFARSAFLIGGNKAKTVKA	222				osc	3.15	233	6							P			SS	1		86.4865		1	222	222	222	0	100	100		0.8378		-14.636		36.2	82.1076	17.9317	7.13338	84.6794	33.8909
15612	15632	WBGene00077691	idpc-4	new	special interest	T06E4.14	B2D6L8	B2D6L8	MNTVISLLFAGLALSSAQVAINGPFLGRYYVAAKPVLAPGVAPLAAPVLAAAPPVFAAPAPLMAPPAPVLASSPAFAAPAPVFAAPPAPVFAAPPAPLLAPPAPVMAAPAPLLAPPVPPVAPIVPAFAPRPVLAAPAFAPALAPAPAFAPAFAPAFAPAPAFAPAFAPAPVLAPRPVLAAPAFAPAVPAFAPAPLVPAYAPFARSAFLIGGNKSKKVSV	219				osc	3.12	234.13	6							P			SS	1		84.4749		1	219	219	219	0	100	100		0.8505		-10.781		41.1152	82.8666	16.0919	8.83567	83.6527	44.8514
15616	15636	WBGene00011535	idpc-5	new	special interest	T06E4.8	Q22262	Q22262	MERRSHQTIITGLLIIMQTFSALLLALSLFSGASAQLAAWPSQSYSPFYQALFGGASTPVLSAPVAKTAPSAIPLAAPALPVPIAAAPFFTPPAPVLAAPAPLLAPPAPVFAAPRPVFASPALAPVAPMAPILRGPAFAYAPSPVLAPVGVAPVAPAPVFAAPALAPVAPVLAAPRFVPAYAPFARAAMFIGSNKAKTA	199				osc	2.95	235.78	6		27.0722	28.5495	0	0		P			SS	1		56.7839		1	192	175	199	8.54271	87.9397	96.4824		0.7289		-10.789		43.5962	72.0953	18.8578	22.1518	90.6411	43.5077
15617	15637	WBGene00011536	idpc-6	new	special interest	T06E4.9	Q22263	Q22263	MQTFSSLLLALGLFSEASAQLAAWPSQSYSPFYQALFGGASTPVLSAPVAKTAPSAIPLAAPALPVPVAAAPFFASPAPVLAAPAPLLAPPAPVFAAPRPVFAAPALAPVAPMAPVLRGPAFAYAPSPVLAPVGVAPVAPAPVFAAPAFAPVAPVLAAPRFVPAYAPFARAAMFIGSNKAKTA	183				osc	2.99	240.27	6		33.0633	37.0718	0	0		P			SS	1		65.5738		1	172	158	183	7.65027	86.3388	93.9891		0.659		-10.914		49.3368	74.9742	21.5328	18.0128	94.6819	43.5077
15610	15630	WBGene00011537	idpc-7	new	special interest	T06E4.10	Q22264	Q22264	MKSVAIFCALFAVSTAQLAAWPSTSYSPFYQALFGGAAAPAVAAAPAFAAPAYAPALGAPAYAPALAAPAYAPGLAAPAFAPAPVVAAAPALAPAYAPAPVVAAAPAFAPAYAPAPVASPMIAAAPALAAASINGLPVAAAPAFAPAFAPAAVPAAVPAYAPFQTAAYWIGSNKAKTVKA	180				osc	2.98	252.76	6		3.25509	2.87708	0.000315418	0		P			SS	1		70.5556		1	130	103	180	15	57.2222	72.2222		0.6793		-3.792		18.8848	73.434	0.776222	7.26112	96.8755	20.0516
15960	15980	WBGene00020550	idpp-1	new	special interest	T17H7.1	Q22537	Q22537	MRLLIVLSALLIPCLAQLSEDSSELEFGGQQAQRPSPDGPLFPRFLMHVPRFARKEFFDIVSNDQLSQDQQNEQLTIWAKAFNVTDEFNAWTKKIQEQKEAVSKNVEAVASNITTVYTQLEEILSNSNLTRRDQHDQIRKLATTFPREVRALFFIARNYRPEGRSPIFGQGIGMGKKPQSSMVPFIFQQQQPPMMMFGQQPFMPAGPMMMNRFQQTGSQQNFQSRRGGRGDGPGFVPGTQDNNQRGSGERGQRQNFGPSDNLTNGNQFSKKQFARGPSSMNSDLSENSQHSDSNSQFDFPRGPGGRGGRGQGPDFGPGGQGGRGQGPDFGPQDDFPGRRGSGGPGGRGGRGQGPDFEPQDDFPGRRGSGGPGRRGGRGQGPDFGPQDDFPGRRGSGGPG…	682				osc	2.91	71.68	2							P			SS			50.1466		2	570	560	682	1.46628	82.1114	83.5777		0.992		21.485		99.1353	93.5642	88.7767	99.7396	99.7494	99.72
2871	2937	WBGene00016915	idpp-11	new	special interest	C54D2.1	N.A.	Q8MQ96	MKQYCCIALISLIVFTNGASVHRAKRQFGVVPLYSSCNEYLTCAAPAVCAAGTCQCAQAYHPSGTQCLPSAASAAAVNGVYQVPAGVAPATFRTVYTDALTAVRPVYQPVVYYPQVVRTPIACALPPCHEVPVPVPVPTAPATVAPTAPTDLPTPAPEATTTPRRLFDSPSIAYPGDYCETTNIICVGGSFCVNNVCVCREGEIIENRQCVPVATTTTTTTTTTAAPTTVITTEPTTTTTTTEPTTTTTTTTTTTTPAPTTASTTTTTTTTTEAQTTTTTELATTTTTTTEAPTTTFSTTTTPAPTTTFIIPTTVAPSREEPGCTPYNCACNPMGCGQGQIVRINFVIPGQQCNSNNQCLAGSYCNSGTCRCANSFEQRGTMCVRRRK	388				osc	2.83	244.79	6		9.42154	8.15445	0	0		P			SS			39.8438		1	332	329	388	0.773196	84.7938	85.567		0.7413		-3.278		25.3132	41.2479	5.77254	16.6175	12.7806	48.4476
17531	17538	WBGene00021084	idpp-12	new	special interest	W08E12.3	Q9N5B1	Q9N5B1	MQSACLIALLALIAGASAQCFGGGCGGGPIFLPPPPCFGGNCGGCSGNNCGCNGNNCGPQVTVVQVPNNNNGCSCSPCNGPVCAPMCNSCPPQPIFIQPSQCCNNNNFSCCPFRFRRHNSAAAASAENTEEATTAAPTQE	140				osc	2.48	248.66	6		64.5586	58.1266	0	0		P			SS	1		80		1	140	140	140	0	100	100		0.9505		5.086		77.2709	44.6156	28.2682	93.9818	95.9789	68.4107
5845	5906	WBGene00017761	idpp-13	new	special interest	F23H11.6	O01919	O01919	MICSQFILLISIICISAQKISGDAGMEDDTVNQNPFNIPTINWEDILKNIPTVEPIALPTLDPNFWQNLPTIPPIVLPTIDPMFWNNLPTIPPIVLPTINPDFWKNFPTISPIQWPTLDANFWKNLNLPTLPPLQIPTLDPNFWKNLPTIPPFVFPTPAPRESQCTYKLSQELQNNATMAARLNYMQVEQVLNRLLLESTWICNGFQTQKLTDLTKKYAVLQSDMQTVTSYFSTSDLQQLLLSILQGDTSQVFRLFFSKTMENLANSTITGELSKASTQLSMLQFDLAINTI	292				osc	1.46	254.39	6		3.49686	2.81352	0.000139134	0		P			SS	1		19.5205		1	292	292	292	0	100	100		0.0324		-13.371		33.7583	55.7062	12.3164	89.462	22.1125	89.4989
2121	2187	WBGene00007817	idpp-14	new	special interest	C30F2.3	Q18329	Q18329	MLSTLLLVCLSAFIAIVQCQNAYGNIYGYDTSNTGNSNNGPFLVQNPNYQFLNDQLANEYSQTYLEELRNYEQQTNPSSSGGVITSSSSVPANGYYTGPALSNDQQNSVNYQQIVQRNPSAYSNTGSSSSNIYGYNYNSGSSGSQATGSNSYSNNAQYSAPTNPQPYIYPFGQFAPAGSSSSNPVLRDQNSNIYTSTMSPTSSGTNNIGTGNAYTGRTYTLFDQPQNSQTGYVSASDLKTTRLRDQPPPANLNLRGTGPLPGPMLTSANANSQLFRDAGSNDIYYGNANTNNYNNNNNYNNNGQQTYSTSTNWQNNQLGVSNSGAPGSGVQFDQSLSSTTMSPTARCALSDPYWCQEYVQIYLSSRQQYQGISTQQSCPSLIASLTESYNGCCTAVRAA…	403				osc	2.8	307.16	7							P			SS	1		18.3623		1	349	345	403	0.992556	85.6079	86.6005		0.9901		28.129		90.4397	88.6121	61.9234	97.9735	99.1869	50.2899
6245	6306	WBGene00009383	idpp-16	new	special interest	F35B12.3	Q20013	Q20013	MFSVTLLVVSCGILAAAYPYSQQYGNYDQQYSQQSQYYPSSGQQGYRGGYQSNPGMQGGYQGNGQDSYQDFQGYQGYQRGQGGQRGYQGYQSNQRSQGSYPERYDSSMYSPVMDLTNYYGSQGTPQYYGYPSSASYQMTPYYQNQNQGYMQQQQYNTPSQSSWSPMYYGNGYQSQQSQQQQSSMGIRPYQSSWGQTQGTNTWGSPYQFTKVDAQVTDDDNVDGSGMDSSEQTSSPASTDDSQMTSNDD	248				osc	2.07	356.99	8							P			SS	1		35.8871		1	248	248	248	0	100	100		0.9983		38.059		90.3758	78.3616	53.6649	98.3419	98.3812	82.2574
668	735	WBGene00015153	idpp-2	new	special interest	B0348.5	A0A0K3AUN6, A0A0K3AV61	A0A0K3AV61	MRTDVGSIPLMCILSTLTTGVFGYLPTEDLTNSIISGNGGYPVPPDTIIPADGDEEGSPDEESDVDSGDSIYRKKVTTFRRRNINAPFGVRVPFSRMAYKAGYGSNRMGYRNTGSPPPPQIGGLYGDRNPNPYGTVNLGGGSPYPGGLEEYNIRPAAPFSGLVGGSRSGYYGSTVGMRRGAVVPPMSSRKTKIPQTEYPPDYASNDLMNSFNGATNSAIPSLRELATYASRYGPAYLRERFGSHDSQLERMLYGGSGPQIPSRGGGIPIDYNMNIASNHWNRGIGSPMGIMSRDVDSYQHDDAAKANKKTTTGSPSTTSTRKPRKARKPTKKTVAAAPSSSSNTSTTAKPAKTVKTSEKSA	361				osc	2.39	138.26	4							P			SS	1		18.0055		2	356	342	361	3.87812	94.7368	98.615		0.9764		6.234		88.8234	76.2122	49.9312	97.6591	96.2417	65.9175
6765	6826	WBGene00009720	idpp-3	new	special interest	F45B8.3	O45522	O45522	MNSFSLILSCSFLISGILAQETSLSPVVHRFKRHCGYNGCGRSVCQECPSCCGNDGPQPFNPVFNIHFNCCGAPRPSPSCCPYVPPAPLPPPPPPASPCCGPSPVPAPCCPPPPAPAAPCCPPPPPPTPSPLVCCKQAPVPENPCCQIVAAAMPPPPSAPACCVAAPVPTNPCCQPAPRPAPCVCSAPRPVPCRCGAPPMECPNCDMPAPRCSMMAPMECSMRRMRRDVHQQILQHLHRTQ	241		n4		osc	2.55	168.04	4							P			SS	1		47.7178		1	236	222	241	5.80913	92.1162	97.9253		0.8985		-9.979		90.226	75.3893	67.9686	97.9735	51.0366	98.6293
10455	10513	WBGene00010831	idpp-4	new	special interest	M02G9.2	O17969	O17969	MRSSWILVAFFVIASVQAIPQRTKRQNCDCTPGEAPKCGCQVMPTPEIGGGQMICTCSPPVPPKCVCTEGNVRNIITGPSLPALFKPYNCVSTCESSCLESCNRLNFNMKCSSVCSEACEFTCAKQGTSTTPTTTQAPATTAMVPLPSNIQEYRFIIPAGSMLTKPTTSTSAPVILSQKIQITCPTECQPACSFVCTKLRPTLKVITQMFDSKTDETTCRTSCSSACLSVCASSGVPGNECQSNCAPACEDTCTIVKPVAVATTTQIQSTSSSGGQCVSVCMPACTQQCMFTVQMQIALSQAVPQTTEKPTQAVLIPIAPVSIVVSDPPTTTAAPTVITLGTICRNECLVQCEHQCLPNNPNCMAACQTTCYPVCQSKMRRRMKETKNQRTEDFAHRQ	398				osc	2.86	192.63	5		4.03033	7.22809	0.00121884	0		P			SS	1		12.8141		1	360	339	398	5.27638	85.1759	90.4523		0.8684		-11.605		68.2289	34.2913	68.6735	41.4616	30.2235	42.3753
6242	6303	WBGene00018026	idpp-5	new	special interest	F35A5.4	Q20000	Q20000	MQYLIAAFAVFQLSLGDEFSTSALTSPYLKMNGSLITRVRSKRQCCAMCPSGNCGCGSCSGFVTCPDRCQPMCTQACVMAKTSVCVDQCMPKCDSACINLVRSGPSCDQQCMPLCLPACINAIQGPTECAPQCMPSCSSNCIQQVFPSCPQQCQPVCTPQCIQSIQVAIQRPTCASSCMPSCSQSCIQKYEITVEQETCVPACMPACSSACVQAVTCSTCTNNCPSICSQANCIPQCMPRCLPTCIQQIQISVPLPPPAPRCDSMCMPSCSPSCVQQYSLCPQQCRPMCTNACVTNLQVSRPVSQCLPACMPSCTSSCVQSMCPQQCYPSCDMNCIQQYAVQMAPTPCAAQCMPLCESSCIARLSCVQTCMPACSPTCVQNYAAGPIQCAPACMPLCQP…	524				osc	2.43	197.02	5		3.43046	3.91662	0.001873	0		P			SS	1		17.7481		1	524	524	524	0	100	100		0.9502		4.985		90.1498	73.434	85.2862	78.0226	90.6411	42.3753
8766	8825	WBGene00019226	idpp-6	new	special interest	H22K11.3	O76631	O76631	MKFMTLGTLFLLIQFVYSVRQEEPPKTQKSSEAQNFKATHDRLKRQNGYGMWNNGGEGGGAGEGGNFPMGNWNGPNSNGYSGPQQPPPDNSIKGSVGNKNSKPAEETENQNKEDGQTPWMPNEANGPSGYNNGPHPNGNFPNLNGYNNGPSSFNGGNTNVDDGIKGSVGAAVEPTKSPYPNNGYGYGNRNGYGNNFGFNRMAGGNGYGNSFGRPILPRGERFFRGRQAWRY	231				osc	0.76	199.38	5		1.86461	1.45676	0.0315596	0.0496129		P			SS	1		32.0346		1	231	231	231	0	100	100		0.9058		15.341		92.6013	74.2103	55.974	98.2117	98.7939	98.1552
16170	16188	WBGene00011949	idpp-7	new	special interest	T23F6.1	Q9XU68	Q9XU68	MQHPTTKYVKLSFALIFLFNIASASIFSDDVTEATSSPDTTTTAVAIRAKRQCGGMGGCCGGMSGCGCGSMGMCGQTCCPSAPPPCSCGTPGCMQCVQQTVLVPVTTTTCCKCCQPVCTNACTNGGGCSCGCTRGGCSRKRRSLLAIASEEMSKRGDVMV	160				osc	2.54	206.74	5		3.8164	5.55515	0.0036034	9.17865e-06		P			SS	1		63.125		1	155	139	160	10	86.875	96.875		0.8948		-14.355		69.3491	16.8632	37.5289	88.9511	91.5942	72.6971
10456	10514	WBGene00010832	idpp-8	new	special interest	M02G9.3	Q9XUS0	Q9XUS0	MRCSIMWTFVLLAIPMVTSELFALTPVSRVRRQCCGRSSSSCCSSSSSNSYCIPVCMAQCQSSCTTPICQQQCSNQCNQQCTSITISSGPSCSSCQSACSSACTTPTCIRTCQRNSCSNLCNTGSNSCTNRCNSQCLQICTTPSCTNTCSNSCSNACSNGGNQPIVIVIPSSSRNCQNSCQNQCSSACTTMTCRQTCQNTCLGSCNSCSGGGCNSNNSNLVVVTPCERSCNSGCRSTCSSTSTLSVCIPACQQTCRSTCSTAKTFVIPCTSGTSGNSCSCSTGYSICGSQCCRS	294				osc	2.32	216.79	5		20.9588	21.8737	0.000139134	0		P			SS	1		52.0408		1	294	294	294	0	100	100		0.9086		0.045		73.6109	26.8902	75.2935	86.8435	95.0504	26.7453
16089	16108	WBGene00020670	idpp-9	new	special interest	T22B2.6	O45192	O45192	MIHNLLLICLPLAAAQIPVYLRAPALSAVAPIAQLQCSQQCMPSCLPSCLVAHYPSASGYQPYGSAVEEYPYQIRSSVAVAPVAPQPVVAPAPVAVSGYQPYGIAYYPVVPSCTAQCMPTCAPTCVDTPASSPVPQRDDLPTPPPETVPTPVPEVPTTTTPTDVVPCKCLIKITITQGDKVISKCGPNSCMCPPSYSQCGSNCCKA	206				osc	2.97	220.54	5		12.8472	17.7827	0.000139134	0		P			SS	1		21.8447		1	191	163	206	13.5922	79.1262	92.7184		0.4629		-4.011		74.93	61.5279	53.6649	70.985	68.1037	69.2459
10223	10281	WBGene00002983	lgx-1		special interest	C54G7.3	H2KZ94, D7SFK4	H2KZ94	MRVLLAISVIYHITIAQQVGINVPCNKELDGLLTADPDGDERAFMSCQGVGVGTIGFWERKLCPNNMVFDFINQHCKEQKKKARKQQNLSIAILNNSCANGETCIGGSVCDLDTLRCMCPYGTTPKLDTLSCESSQPPFVSATVDGPAQFFNSFSGGNGNRNNQNNGFMPFGQPSELPDFQPNNNFKYGNNFGQNQNSNNNNNDFNWNPNFNWNNNQNNNNNNAPNKQAPMNNAGVGATTTPDFNPFQPNPNQQFVFNFNKNQGGQNNQNNHVNNNNHNQNIPVLESKPKVATLVGIGALCSDLAECDHGSTCVMGRCTCVSPLVQHEGKCVLRQQQKIVVQVMTPPPTLPPVQVPIQTLPPQTRPPQLPPVQITQPPIQTPVQPIFFQTTRPPMPTYA…	1554				osc	2.36	150.65	4		3.36166	6.66508	0.00248428	0		P			SS			15.6371		0	116	0	1231	9.42323	0	9.42323		0.8864		37.705		97.1285	94.365	93.4979	94.8858	4.65733	16.5586
10476	10534	WBGene00019756	lrpc-1	new	special interest	M03E7.4	Q21496	Q21496	MINPIVFSFLISGALLLVVSGNGIEQLMVAEGPIPQNFCNSSDLLEEAGLIKSTLGQFLGYECSEEFYHCRWQSDGFRTYRKKCKPGLVYDVLGTQNCNYDYNVKSCGVRSGGPVQCNGTDFHCPLSEQCVPMSSRCDGHYDCSMEEDEQNCPLCTAGEFACKVSEQCISLDRRCNGLIECDDGTDERDCDVCGHGLFHCGKSNECIPMDERCDGRRQCPHGEDEMLCKKPETEKKFTCQSRDYEIPTNQVCDGMPQCPDGSDEAYCEYPGSPKSQAAISFSSNLTPASESRPAPPPPTPAPEQPDQEEEAEEDYDYEQIKDENAPAAFPMISLGPLPPIATTTTTYTPPTTRVMTRPPQVATRVAKPAFSRPRPKISATDDNRPTISSKASQTNSVRV…	542				osc	2.52	188.23	5		1.50477	1.50636	0.0326572	0.00899784		P			SS			14.7601		1	53	36	542	3.13653	6.64207	9.7786		0.5551		-10.823		91.7244	87.0032	86.3572	87.9268	20.2506	91.5598
10366	10424	WBGene00003075	lrx-1		special interest	T04H1.6	Q22179	Q22179	MAWLTSIFFILLAVQPVLPQDLYGTATQQQPYPYVQPSASSGSGGYVPNPQSSIHTVQQPYPNIDVVEPDVDSVDIYETEEPQFKVVNPVFPLGGSGIVEPGTIPPPMPQTQAPEKPDNSYAINYCDKREFPDDVLAQYGLERIDYFVYNTSCSHVFFQCSIGQTFPLACMSEDQAFDKSTENCNHKNAIKFCPEYDHVMHCTIKDTCTENEFACCAMPQSCIHVSKRCDGHPDCADGEDENNCPSCARDEFACVKSEHCIPANKRCDGVADDCEDGSNLDEIGCSKNTTCIGKFVCGTSRGGVSCVDLDMHCDGKKDCLNGEDEMNCKQEGRQKYLLCENQKQSVTRLQWCNGETDCADGSDEKYCY	368				osc	2.28	166.4	4							P			SS			0		1	117	117	368	0	31.7935	31.7935		0.2734		2.371		73.3923	61.5279	53.0386	89.462	36.7109	71.7612
11177	11227	WBGene00003525	nas-6		special interest	4R79.1	Q9U3S9, Q2HQL9	Q9U3S9	MLDHVLLLTYCLVSTVVRSQPSADVFRSFAGYIPEDHRVTHHEWQNSGKFQGDIDGVDPNLLKLPEGPVLFNALKNKQLTWEGGVIPYEMDTAFSPNEIKILEKAFDSYRRTTCIRFEKREGQTDYLNIVKGYGCYSQVGRTGGKQEISLGRGCFFHEIIVHELMHSVGFWHEHSRADRDDHIKINWDNILPGMKSQFDKISAVLQDLQGENYDYKSIMHYDSTAFSRNGRNTIETVENGFTQVIGTAMDLSPLDIVKINKLYSCKTKKKEKVKPATTEEPHQLIPQVVDKNSVDSGEKCVDHFADCPHFAQYCTRASFFFVMKSYCPFTCKHCPGDRKLKKSG	344				osc	2.4	164.44	4							P			SS			8.33333		0	56	0	344	16.2791	0	16.2791		0.0485		-16.223		36.2	37.8728	9.85753	47.2366	22.7684	70.9064
11242	11291	WBGene00013926	nep-1		special interest	ZK20.6	Q18673	Q18673	MYTRFGPPIVFLISCYALILCGTVDALPRAPYFNDDINKTTTTSEDKTVGNTVVEEEKKTYTVGDSEGYQEASRLLQKSLNLSLDPCDDFFEYACRAWVDSHPIPDDLTSYSQFTATREKVLAEMRKLYEDNTSIPTSKSIALIKQIYNTCMDTEKHNAVGARDLLEKIKTYGYWPMVHNEKWRESTFDLTKLLSNTIQSRDVSVFFDFGPAEDSRNVSRRLLSFDQGSLGLGYSTRDYYLDEKKYEKQMKAYRKYTIGKVRYYTEDAGMAVNESKIESDVDEIIAFEKEWAQILVAEEDRRNYTKLYNVRRFDDLKEYMSIIDWKKLTLSTTPFLVHSYLKTNPSIIISDVEYLQKMNTLLQNTDPRIVTNYILLRWAGSWSQEIGKKYEDLQQEFAF…	754				osc	2.27	143.47	4							P			SS			1.59151		1	61	61	754	0	8.09019	8.09019		0.0918		-10.894		7.45517	75.8168	11.0391	11.2822	25.5859	12.9231
11750	11794	WBGene00007246	nspb-10		special interest	C01G12.6	O45237	O45237	MFAKCFAAVLLCATIMGSHQQVVVPAYSAAYYPSAYAYPSVYSPYVSAYPSVWAWGSNKNKDDAPRVFSRPSLINKPSA	79				osc	1.38	274.37	7		31.5664	29.351	4.55129e-05	0		P			SS	1		39.2405		0	21	0	79	26.5823	0	26.5823		0.218		-6.489		44.0948	35.5072	7.33972	67.1408	82.6333	68.4107
11751	11795	WBGene00009398	nspb-11		special interest	F35C5.10	O45446	O45446	MFAKCFAAVLLCAMIIGSQQQVVVPAYYPSYYPSVYSPYVAAAAYPSVWAWGSNKNKDDSEAPRAFSRPTLLNNQKPTSA	80				osc	2.98	272.04	7		21.7234	19.063	4.55129e-05	0		P			SS	1		37.5		0	27	0	80	33.75	0	33.75		0.1275		-6.26		45.9764	39.0248	6.95407	68.3911	84.6794	70.9064
11752	11796	WBGene00017305	nspb-12		special interest	F09F7.8	Q19279	Q19279	MFAKCFVAVLLCAMIVGSHQQYVVPSYSAAYVPSAYAYPSVYSPYVAAAAYPSVWAWGSNKNKDDAAPRAFARPSALLNNQKPTTA	86				osc	2.89	273.82	7		9.2955	8.22912	0.000139134	0		P			SS	1		38.3721		0	26	0	86	30.2326	0	30.2326		0.0461		-5.731		38.4083	40.1646	4.98649	51.663	82.6333	64.2938
11757	11801	WBGene00019152	nspb-6		special interest	H04M03.2	Q9TYQ9	Q9TYQ9	MFQKSLIVLALALFCISSSQVVYSPEVVASPYYYGAAPVAASAYPYAYAYGATAYPTAFYGWGSNKGQQARASAVPTQKLTNNQ	84				osc	3.14	284.44	7		12.5018	7.44327	0.000139134	0		P			SS	1		36.9048		0	23	0	84	27.381	0	27.381		0.1898		1.148		47.8752	34.2913	6.33751	69.6536	94.6819	63.5004
11759	11803	WBGene00007250	nspb-8		special interest	C01G12.10	Q7YX80	Q7YX80	MFAKCFAAVLLCAMIMESHQQVVVPAYSAAYYPSAYAYPSVYSPYVSAYPSVWAWGSNKNKDDAPRAFSRQSLINNPST	79				osc	2.93	274.95	7							P			SS	1		39.2405		0	21	0	79	26.5823	0	26.5823		0.081		-3.58		44.0948	36.6863	6.0452	67.1408	87.4011	70.0639
12167	12197	WBGene00020237	phat-4		special interest	T05B4.3	O16424	O16424	MYFLISLFFVPFSSAVIGGDLNCTTYNGTAFVYTPSATACSNSISDSSCAALYPPADAAIGYPAAGNDAERPFACYTTATPTPAPVVADMKTAALANCAKTCGFCCSTDAYNCPNVAFPRLNCNTITKAQCDSVTWRTIIAADCPSACGFCNQGGCVDAVTNCGNDLSICQTVGMQDFVNQYCQRTCGRCPSTTGSGTVTTASSGSCTSFAADSSSSCSAWAANGFCTNTFYTAAQRKSRCATSCRLC	248		n4		osc	0.95	209.14	5		2.36308	3.39936	0.00707882	0		P			SS			17.7419		0	21	0	248	8.46774	0	8.46774		0.9489		-10.447		36.4112	54.7949	6.95407	49.4154	96.8755	32.9108
12311	12341	WBGene00004102	pqn-10		special interest	C09E7.2	Q95YE5	Q95YE5	MGMMSSNFIILIPILLSLIGNVITQFIGYPYDYSSMYSGYSGYNPMMSMSNTMGSMGSMGSLGTLGSMGSMGMNTMGMNTGFGTFGTGMESLYGGATQQAFGAYNPYGNGLFNFGSNGMFGQNAFGTGFNNNLFGASTNGLLGGQQQQQLTTNAFQNSQPMSLNNGNTMKAYGRRSTAQNFNNNNNNMNNNQNHNYAPTRAGQNGGCNGFGGDCQQVILIVFHLDLPSFNSVSLRLILIQLQIYDKMASIKRLPIIESTERQVKTLAFLLEIEDQQASQIAVDTLLHFYVFKLHRDEGDLEVAELSTPTKEDYSKAYWQLFECQWHLLSSEHQDAEEFTRPLEIIRKWHSVPHTPMPTTETFNEMSDGERRRFNIDREKRKKASRRLIFLPKQEYPELI…	408				osc	1.48	160.21	4							P			SS	1		27.9412		1	233	209	408	5.88235	51.2255	57.1078		0.9712		33.763		80.6559	40.1646	57.5633	97.1555	98.2682	45.4729
12313	12343	WBGene00004104	pqn-13		special interest	C14C11.8	H2KYR7, Q17982	H2KYR7	MVRWQPLLFALLVAFAYAADGTTKSEASSTTVATSESTTESTKTTTASAIKETVKEEVKEKEGPETRNETAAVSRAKRQCCFAAQNSCCPQQVQSQCNCAALQIQVQQCDCANMLQTQCGCPSISSPSCDCGTLQNQYSSCGCGSLSYQVSCNQCQQQSQPQIIVVQQPQQQQCSSQCMPACLPSCVQSSCAPACQPMCSSSCVQQQQQQIIVVQQPQQQCASSCMPSCQPSCVQQACAPACQPMCSSQCVEQQQAQIVVVQQPQQQCTSSCMPACQSSCVQQACAPACQPKCSSQCVEQQQAQIVVVQPPTSSSNNCASSCMPQCTPQCVQQQTICAAACQPSCQSSCSSNAQCVQACLPSCESSCVQQQQPSVVVVQDSQSSCPSACQPSCSQQCIQ…	572		n3		osc	2.86	159.86	4							P			SS	1		62.5874		1	653	645	661	1.21029	97.5794	98.7897		0.993		15.225		94.7286	84.9324	89.155	39.7568	98.5802	14.8612
12323	12353	WBGene00004115	pqn-26		special interest	DY3.5	O45322	O45322	MAHRQRRLLLVTSILLHVASTLANIYGTAEIQQQQYQQQQQPQYSQSYGESPSSFPTSFTYTQPETQSYQPSQQSSASSSNLQFHSYNSQPGIQYGSQDSFYPNQAALTAAATSFATSAAQQYAQTYSQQQQQQQVQAPAQIDQANLAKYSQYLDILQKAYGIQLPGEMSMQPNTAATNAGGYQTSQQQQVANQVPQTYGQSQQPPPTQTYSGYPQNVAQPQPQVNTQSQAEITYQQQLAAYQQQQQQIAQQQQLQQQQQLAAEQQKQQQQQQQIAQQQQLAEQIAAQQAQQREAARLAQQQAQQAQQAQQLQQQIRQQQLQQQQQQQQQNQYGGMQPNPYVQPQAPVQQQIAQPPPQQPAPQQPMNFLPAPQAPIIQAPAPQAPAPMQPQQPPKQYVT…	664				osc	2.63	167.35	4							P			SS	1		55.2711		1	589	575	664	2.10843	86.5964	88.7048		0.9981		43.72		96.3228	97.0474	89.9975	14.6942	86.5831	42.3753
12325	12355	WBGene00004118	pqn-29		special interest	F10F2.9	K8F812	K8F812	MNIKYFTFLVASVLCEFNLTETLAKNESSPLVDLSKVARDQGAIVVAAFPAVSTIKAKSKKKFGLGAFERGYTNTGATFSRRGRSGASTGNPYASGYQGLPESQSSLPGDRVGGMTRTGKRTFGSYGSVDTAKGQSSAHRAGTGSGWRGSSRNDGENDDWNNGDQNNNNNFNSKNNRMNKYGNRNDGDDYNGNGNNQDNWNSGSNSGGYNGGGGGSGGGSNWNNGDNENDGWNNNNNNRKSNNNNNNNYGNSWGTNDNDGNSWKGSGNSNGNSDNWGGSSGSGSNGGNDGDSNYGNEGSWKPSGNSYGRNRGGGNEGGDQWGSNNNGGDNYGSELSNNWGGSNGGSGSNGGSGGGNTDNDNWGSNNGNSGGSWGNGGTGGSGGSGGGNWGDNDNYGSSN…	549				osc	2.61	201.54	5		2.00032	1.77559	0.00676941	0.00142386		P			SS	1		63.2058		1	506	474	549	5.82878	86.3388	92.1676		0.9867		41.276		97.1751	91.5991	86.7183	99.1845	99.6733	37.6738
12326	12356	WBGene00004119	pqn-31		special interest	F21C10.8	Q7JNW7, H2KY72	H2KY72	MQFLTILSVCVLAVAAQQQYDNNGQTFTTNQFAAAYSTNQQYQPSQGAQYDQYGSSTLQYNNGATAQPIQYNQNQQYGSTAQYNQNQMQNQQNSNQYSTTSNMNNQQNSNQYQQGQQNNYGTQAQYDAGQNQMGQSGQVQGYSNNGYSNQNSQMSQSQASSGSSSVSLMDYSFNNGNCQYKDGQVIENGQTRQATQQELQQIQQYRNSVDQYMNQVNGYVGQWINSVFQTLPSVNNSFPNIPTMPTMPTAPCLCNAQNCGNTTNTNAIGNTPQRDAYGNQMGSNSQFQQANQNGQYQNTQYQQQNGQNGQNQFQQSNGQNQNSQYQQTSNQQMNNQQYQTGDYQQTNTQSMGSPNTGTQQSNNQQMNAQQTQQQQQYYGRKK	382				osc	2.69	324.69	8							P			SS	1		46.8586		1	382	382	382	0	100	100		0.9935		57.517		94.5787	93.6256	76.3965	93.2007	99.4129	41.098
12339	12368	WBGene00004139	pqn-54		special interest	R09B5.5	O44606	O44606	MRFTSLAIAFFACALVVSGNVLREKRQCGCAQPQQSQCSCQQVQQTQSCSCQSAPVQQQSPSCSCAQPQQTQNVQVQTTQCAPACQQSCTQQCQAAPSVAQCQPQCQQQCQSQCAPMYNPPATTTPAPVVQCQPMCQQQCQSTCVQQQQPASQCQPQCQQQCNVACDAPATSTQAPQVVHIQLEIQQAQAQCQPQCQQQCQSSCTQQQQPANQCNSACNSQCSNICQQTAQATQQVYNQNSNTNTQMYNPYNNNNQGSGSANCAPACQPACDNSCTSQTPAPMYNPYDASTSAPASSQAVIQIVLQSSVAQSSQCTPQCEQSCQQQCVQQQQPAAQCQSACQDSCSSSCQAAQPATTACQQSPQSPQNSCSCQANYSPCGNGQCCRRK	388		n40		osc	3.2	242.67	6		46.0327	37.5074	0	0		P			SS	1		64.1753		1	380	375	388	1.28866	96.6495	97.9381		0.9949		30.927		92.0757	90.5208	76.927	34.6475	98.7128	37.0818
12344	12373	WBGene00004146	pqn-63		special interest	T06E4.11	Q22265	Q22265	MRYHLAPIGLLLCLFLADAQVEQLNPGRYYAKAAPVLTPDLLRPCLSPPCPIAANPLAPGPVAPAPGPAPGPAPGPAPEENLPTPPPEQYPPQDYSVQSPPAPQGQQPIYPGGQTPQGYPAHRPVYPQQPLQNPQGYPQGYPNAAQSPSQPPGYPQQQASQGYPQPPQAQQTPQGYPGPAQIPQGYPQNQQAPQMSQGYSQASQQAPQGHPSGPQQPLMTGQYPPSQQKPQGYTQGYQDSAQVPQGYPQSQQAPQAPQGYPQQPPQDPTQYAQPPQQQQPYPYPSQQQLQSQASQGYPQNYPQQQPMPSQYSPQQAQQQLPPSQYPEQGPGPIQQQFPQQYPQGPAQQQAPGPQQYPQGLQGSPQGSQQQQMPPQPQQQMPSYNQPEALRQEIDQIQEG…	469				osc	3.17	223.06	5		28.8027	31.6926	4.55129e-05	0		P			SS	1		51.8124		1	452	430	469	4.69083	91.6844	96.3753		0.9978		39.254		97.9907	95.861	85.9224	99.1157	98.7792	99.6217
12349	12378	WBGene00004153	pqn-71		special interest	T23F1.6	O18118	O18118	MRCVIILFAVALAVAQASSIRETRQASCGCAQSVQPTCSCQQASQQYSCSCQPSTPCSCASSQQYQLQTSQCMPACQQSCSQQCQSNTNTQCQPTCQQSCQTSSCNPMTSTPIPASQSCLPECENRCMQQCTQQQTAQQCQPICQQQCQQECGSTGNMMYNNQDPYNQMQYGGYNQQGNQYQNQNQYQNPNQIQNQYNQNQYQNQNYYNPYQQTQCQQQCAPQCSQQTSTNCQQCQNSCQNSNTQTITIYVQASPQTSQCVPQCQQQCQQQCQTRTTASQQCAPACSTSCNQSCNQPAQMACQPMQNSQCGCQQNYSPCGNVSGQCCLKK	330		n54		osc	2.69	274.96	7		17.1823	13.2862	0.000139134	0		P			SS	1		65.7576		1	330	330	330	0	100	100		0.9295		55.875		90.7148	84.9324	71.8939	76.9418	97.9735	61.3142
12352	12381	WBGene00004156	pqn-74		special interest	W02A2.3	Q9XUB6, A0A061AKS9	Q9XUB6	MARFLLIIGCATLAALASCESKSGEETPQYWRAILGDICQLPSFPRATGDPTRYVECVRQSSFAADRKDLGIWLLRECLPGYEFVASARRCKTVRSVNKQQELCESANATEYNFCPTASAMQFLVEETREAPRQCACPNGEQNCVCPSPEILEPISAVKKVRRSAQQQPLRFSQYPSCPCPQNQPACTCSTNNQQNEQILVSISCCQQQETTTQAPVQMQPCQCTPTQIQQNCQTTTTQQQYCPQQSAPVVQPQPCPLVQGSGVQNAQYQGICSWMIDPLATDPQSRTHYLQCQPAPNNLFCGRWQRMPCAPGTVFDVQSQVCVWDTNSQPGTLPTPAPYVSTQAPQNAQCGCTGGVQIGSCNQNYQCPGQSVCQVGQNAGQQCMVCCYFRKKARRF	397		n3		osc	2.84	232.47	6		43.4776	37.6694	0.000139134	0		P			SS	1		11.335		0	38	0	397	9.57179	0	9.57179		0.5936		12.507		87.3422	80.307	67.1457	91.1226	88.843	56.8583
12353	12382	WBGene00004157	pqn-75		special interest	W03D2.1	Q8MQG9, U4PBP8, Q8MQG8, H2KZ77	Q8MQG9	MEIIHLMVKHLFIILAATAAVVAQQSNFGGQQQEQSGFGSQSGFGNNQGSQGGFGGNQGGFSGSPQQGGFGGRTGSPPPFGGFSGAPQGFGGNQGGFGGQTGFSGAPQGFGNNQQGGFGGNQGNQGGFGGRTGSPPPFGGFSGAPQGFGGNQGGFGGQTGFSEAPQGFGNNQQGGFGGNQGNQGGFGGQNGQNGQNTGNNGGFGGNQGVTASGFGGQQQGFGQQQQTQNGFRGKRQAPPAGSPPPPPPPKGSPPLAGSGSPPPPPAAGSPPPPRTGSPPPPPTGSPPPPPAGGSPPPPRAGSPPPPPPPRGSPPTGSLPPPQAGGSPPPAGTGSPPPPPRQKRQAPERSPPTGSPPTGSPPTGRPPRGGPGKSSEESSESREGPRGGPRGGPRGGPRKS…	524				osc	0.63	345.44	8							P			SS	1		89.2393		1	531	496	539	6.49351	92.0223	98.5158		0.9995		41.601		98.9683	89.3662	94.591	99.7396	99.5922	99.3122
12369	12398	WBGene00004173	pqn-94		special interest	ZC15.8	O18271	O18271	MQSFLIASLLVASVFAQYQQQQYQQQPYNNQQYSNNQYQTTRGYNQQQQYGQTNQFGQTTTPRYTSQSMYGTTQSGRQFDQAGNQVFFNSVGQSSAVLSLVGAAAYALL	109				osc	2.49	316.05	8							P			SS	1		55.9633		1	89	76	109	11.9266	69.7248	81.6514		0.809		39.455		67.4748	60.0197	19.7494	65.9224	94.6819	77.6026
12539	12568	WBGene00019839	R02F11.1		special interest	R02F11.1	O16364	O16364	MKQLAISFCIILPLACFWVLNAEDAKEAPEIREANSTVFRQKRQFGCPSNCYSSCSSSSQCQRYSVASVCVQGCCCPGNNNLDTACSGGPAVAACLGGLCGQGFFCSSNNYCCRCQSGNSTGPCVNQVCPTGFMCNTNNYCCPLGSGGVLGSCVNGVCPTGYTCGAGNLCYLSSGK	176				osc	1.9	160.13	4							P			SS			21.5909		1	38	37	176	0.568182	21.0227	21.5909		0.9796		-6.791		70.2407	14.5173	32.0757	94.5615	97.1948	66.7281
53	38	WBGene00000016	abf-5			T22H6.5	G5EFQ2	G5EFQ2	MNYNFLLLSACIIFLIPEKSESICVTRRTDWGQFGSFFTDPLCDVWCRIRRCGKGQCREDPATSNTANCVCEKCYRDDDGNVIFPDNDGFQQSRLNFDNSPTSSSPWTMNQRNEDDLYPSQDRYDTDRN	129				osc	1.83	351.45	8							P			SS	1		0		1	43	42	129	0.775194	32.5581	33.3333		0.1874		-13.109		52.1469	47.9833	21.5328	85.5809	47.5215	91.0931
1001	1068	WBGene00007240	C01G10.15			C01G10.15	Q7YX84	Q7YX84	MRFLTLIATLLVLFSTANAYYLYYYYPNNGYNNNNNNGYTTYYYYPNNNNNNNNGQTYYYYDNNGYNNGCSGCSNNNGYTYYYPSNSNGYTTYYLTYGKK	100				osc	2.11	350.34	8							P			SS	1		69		0	0	0	100	0	0	0		0.2904		41.1		28.8578	28.0619	16.0919	67.1408	70.8843	54.0604
8539	8598	WBGene00007517	gpx-3			C11E4.2	Q95003	Q95003	MAPGSVLSLAVALATIIGISCTATVDETMRWKECLNTNQSIFDFQIETLQGEYTDLSQYRGKVILLVNVATFCAYTQQYTDFNPMLEKYQAQGLTLVAFPCNQFYLQEPAENHELMNGLTYVRPGNGWTPHQELHIYGKIDVNGDNHHPLYEFVKESCPQTVDKIGKTDELMYNPVRPSDITWNFEKFLIDRNGQPRFRFHPTAWSHGDVVTPFIEQLLAEPAN	224				osc	2.26	322.26	8							P			SS			0		0	27	0	224	12.0536	0	12.0536		0.0465		-9.01		29.973	17.6247	6.61263	61.3854	40.7369	76.0771
16827	16838	WBGene00008628	ttr-21			F09F3.6	O17776	O17776	MTLISLTLLVAFLVFAQLSDAVLNVVGSTQTITVTGRLVCQGQPARNVLVKMYEDGTIWDSKLDSTKSANDGTFRVAGTYTKIFTLDPKVNIYHQCNYNGLCSKKLTINIPDYAVASGSGSSTNYDIGTLNLANQFSGETTDCIH	145				osc	2.2	321.13	8							P			SS			0		0	26	0	145	17.931	0	17.931		0.0065		-12.987		28.3075	21.0685	7.33972	58.9732	52.2034	54.6966
10559	10617	WBGene00010940	M163.8			M163.8	Q6BES2	Q6BES2	MSSTSLCVLAVLIIFSTVEMCMDVNPNCANWVSNGFCTSSFYSDAQKTEYCPASCRLCSGASSTTSSSASSSSSTCGDSNSNCASWASNGFCNSTFYTPAQKSQYCGATCNLCGGASVETSSGVAASTTAATATTSA	137				osc	1.66	343.31	8							P			SS			36.4964		0	47	0	137	34.3066	0	34.3066		0.5152		-4.829		56.48	48.9266	28.2682	58.9732	95.8266	51.5033
16833	16844	WBGene00011284	ttr-27			R90.2	Q22032	Q22032	MCSSPTTLFLLFALVSTSYALLGVGRTQSVAVSGRVICNGQPASGVKLKLYEKESTFDVLLEEATSDANGQFRLSGSKTEISTIDPKLNIYHKCNYNGLCYKKIGITIPDNYVSSGKTPSKTYDIGTLNLANQYTGQTTDCIN	143				osc	1.54	335.57	8		2.06196	2.08943	0.0485976	0.000998683		P			SS			0		0	27	0	143	18.8811	0	18.8811		0.0119		-17.981		34.7237	25.6988	20.6436	50.4888	55.9445	58.9929
16835	16846	WBGene00011286	ttr-29			R90.4	Q22034	Q22034	MVIRLASLLVALTLVFCQEDNEIVTKNFLGIGRMQAVAVSGRLICNGRPATNIKIKLYENEILFDRLMEESRTDSNGQFRVSGSKREISRIDPKVNVYHKCNYNGLCSKKFTIKIPKDYINRGSQAERTYDIGTLNLANKYPGESTDCIN	150				osc	1.41	354.49	8							P			SS			0		0	28	0	150	18.6667	0	18.6667		0.0107		-23.159		38.988	25.6988	9.35888	65.9224	46.2786	64.2938
16828	16839	WBGene00011450	ttr-22			T04H1.3	Q22176	Q22176	MFSITYIALSVFFLIHCSDALLNVIGSTQSVTVTGKLVCEGQPASGVLVKMYDDGTIYDSKLGSTTTSSDGTFSVSGTYTDILTLDPKVNIYHSCNYNGPCSKKVTINIPDYAVASGSSSTDNYDIGTLNLANQFSGETTDCIH	144				osc	1.64	338.38	8							P			SS			11.1111		0	26	0	144	18.0556	0	18.0556		0.0114		-14.649		34.5247	23.1565	17.9317	56.5291	54.7015	58.2756
16829	16840	WBGene00011894	ttr-23			T21C9.8	Q22643	Q22643	MIRILFFALFLTSANAIFNLIGSDQYVTVTGRLICDGQPASDVLVKLYEDGTIYDTKLDSTRTSYDGTFRVSGHYTKVFDMDPKVNIYHSCNHYGMCDKKLRIDIPHYAINSGQNFGVDNYDIGTLNLADQFSGETTDCIH	141				osc	1.24	354.97	8		2.05334	2.02396	0.00593577	0		P			SS			0		0	17	0	141	12.0567	0	12.0567		0.0034		-17.14		29.0838	20.1204	6.95407	69.6536	48.703	65.1363
18434	18441	WBGene00012883	Y45F10D.2			Y45F10D.2	O45945	O45945	MLGFIVFALFANIQSAPVVGLNYDNIQYLHNLSLTYSNNSLEGLGAIDNFTDVNSQMAQSLKSAINSALPGYLVSSRSSTPPASSASSSASSMTPTGNGAQASTIPMNQGSSTSMPVRQKRQAVSTTTTTASPMSTSSPTPSQQPSTTQPYGTDEEFYARTDLVHFHVDINDLEGSGTI	179				osc	1.7	330.64	8							P			SS			26.8156		1	92	78	179	7.82123	43.5754	51.3966		0.639		7.394		70.5601	69.7396	43.1516	69.6536	81.5181	65.9175
3955	4017	WBGene00013180	cutl-10			Y53H1B.1	Q9U250	Q9U250	MSKLCYLLVLLIIQVWAADPPTLDNGISELPEVDCMEDRVKLSFKTQRPFHGRIFVKGMVDKQACVRDFVTSQAKDVTFELENGACNMRRQRMLGPEKRGMEMSMTVIISFHSTFITKVDRAYRCTCFYMEADKVVTNKFDVSMLPTTDLIDTARMPLCTYSVRRDSITGPIVEFAKVGETVYHVWNCESDMFSMLVHSCFVDDGNGDERKPLLDEHGCAIDPLILPDLTYNKDNNVAYAQVNTFKFADKVSTYFQCAVSTCMNTEGMCDGKTPPRCGPAGSFRSSSSSNDNGFNRRSRRATLSNRTAVNWVHLADTMDLAANKITVFELEEKQNSEDKDEPPAHSHLAILQGSHPSTVVCLNQSRIQIFFVLSFLMLTVVTVLTIFTVRRSMTAPTKC…	403				osc	0.83	338.57	8							P			SS			9.92556		2	134	113	403	5.21092	28.0397	33.2506		0.036		-10.523		29.5014	49.9312	27.2144	43.2302	25.5859	54.6966
19399	19406	WBGene00013515	Y73F4A.2			Y73F4A.2	Q9XWC3	Q9XWC3	MFRSIAVLSALLFAFASAKTCKYDSSDFEVYWRFANNSINMQFMNTDIKNNEWTGVGFGDDKNNFVGVFFMVSNNQVTVRTGSTTQHGPPTFTQSGTNTASVSTQALNYFPEDKTMSAVVQIPIQFNGRSLQSCQKWRFVKSGKIENGQLTRNDKSPKEKKVCPMECN	168				osc	2.47	323.47	8							P			SS			6.54762		0	11	0	168	6.54762	0	6.54762		0.0162		-1.481		71.012	60.8008	25.3918	72.2132	91.1275	78.3616
19400	19407	WBGene00013516	Y73F4A.3			Y73F4A.3	Q9XWC1	Q9XWC1	MLSQTIILLLISIGTVASQTCKFSKSAVKANWKIQNGALQIQYQNNRITNNQWTAIGFGPGMSNLNVIVFIVQNSQVTVRTGRTSGYGPPSFDNQSSVSVQMANHSGSTLNALVNVPLNFNGMNIQNCQTWNFVQSGPINNGNMGVHTSRPDQVNNVCASQCR	163				osc	2.25	342.39	8							P			SS			7.36196		0	14	0	163	8.58896	0	8.58896		0.0176		11.321		67.4748	47.9833	25.3918	91.4616	92.8126	51.5033
19955	19962	WBGene00013949	ZK262.2			ZK262.2	Q9XTR7	Q9XTR7	MQKNIQFFGFLIILLCENPVFAIFGPQDAQYNETEARMLLNLCAAAYSDDATPCIGRTFSAAENQMVISQFSVKCDFIGNPCAGYIVVSEALQQITVVFRGTKTNSQLLLEGWTTLHPSADFYGMGLVNTYFRSGHEKTWQYVQDALSIPQYRNYDVYVTGHSLGGALAGLCAPRIVHDGLRQSHQVKVLTFGEPRVGNLDFANSYDQLVPYSFRVVHAIDVVPHLPGCVKDLSYTPPAGSDGSMPCDPGSRNGGYHHAIEVFYPGNMAPGDPYMICTGLPRNEDFGCSNAPKVDLDDTNQGVWDHRNYFGVEVPAYGKGGCDPTMTFKGPPTETGILSLISSVFGRKRRSIR	353				osc	1.42	327.26	8							P			SS			0		0	31	0	353	8.78187	0	8.78187		0.032		-9.404		48.622	35.5072	10.4274	90.2972	62.5817	52.1322
578	645	WBGene00015056	B0222.5			B0222.5	Q17457	Q17457	MRAFCIILLVGFTQVNALFGDRLLRARNPKTGPCTLNDDGLKCNENGYYETVQCNSESCYCVTPHTALVAYDTRTNNPKTAPKCGTCLVYLQKLFADGDPPENSFVPKCDVGKGDFEPVQCDSKKNQCYCVDTNTGREIQGTRKPLSNTTKMNCMQIDFSIDSSAFPAFEKPDPAKPKNDQPIGKPWCASNRNAGHTCNQNKTSIRYWFDVETFQCFPFEHKGCGGNQNSYRTSSECYFDCVLQDYFSCAMQSQPARKSNGQWYSCPEGPDGPPGFKTTTTPGPKLTSDGCPKGYICSMGAFFGICCEENLTNRYQAAFKPLCKNKKEALQTKQDDWSSAMLGKSCSDRFCPSSHTCEHNEFFAYCCPR	369				osc	2.12	319.63	8							P			SS			4.33604		1	32	32	369	0	8.67209	8.67209		0.5231		-8.579		77.4404	73.434	53.0386	52.9452	93.1589	90.5871
1628	1695	WBGene00015805	C15H9.11			C15H9.11	Q95QW3	Q95QW3	MFSVKVLAILIVVPVLVISFKCPQTDLSTNTAYSDCSANNYCTTIIEFNSDGTFKDEKKGCDNANCQGTGRFSSVNQYAIGGPTATFYNCCTGEHCNSATSKGLLALPIMILSYVIFK	118				osc	1.2	334.8	8							P			SS	1		12.7119		1	35	35	118	0	29.661	29.661		0.048		-11.901		36.7477	19.2041	8.91427	57.7598	80.3144	65.1363
2398	2464	WBGene00016504	C37C3.12			C37C3.12	Q8I7H8	Q8I7H8	MIHRLLLFFSIVLVSVCADNMTWSEKQEYCRIGSNDLNTCETCVGKGSNCFWCGGKTKRCMPFDWYYPDCNIKHVKYNVCWVSTSAAAIVIAICAGIIAVILIACFCYCCCKCKEYNRIHKKAKAQKWNEKRMTAQQEMDERHSVRSDQRKAELEAYRMKYNIPAKGDDGKV	172				osc	1.61	319.65	8							P			SS			23.8372		2	100	80	172	11.6279	46.5116	58.1395		0.0151		-32.245		34.1464	22.0437	6.0452	52.9452	53.4095	64.2938
2833	2899	WBGene00016894	C53B7.3			C53B7.3	H2KZE4, H2KZE2, A8WFK2, H2KZE3	H2KZE4	MQFTILLALFGLASAATYYSSTPSYSNSYRSCSSSYECSSGQTCSNGQCMSSLGYNGGLYSNTYNNNNQYDMNSQYGNQMGTTGSGTYCTTSYSCRSGETCMNNRCQSSYSNNMYNSNSQYSNSGSTCRYSTDCYSGQMCSNGVCVAQYGTSYNNAMYSSSTGNYCTYDNTCGLNQRCVNNMCQSTGSNSMYGSGSSGYNTYGSGNTYGSSNSRCTYNSDCGSNRYCSSGYCTSYVLRQKRSS	243				osc	2.4	326.04	8							P			SS			50.6173		0	6	0	243	2.46914	0	2.46914		0.9861		21.137		84.1857	74.9742	56.4775	96.3817	99.2361	39.3196
5104	5166	WBGene00017247	F08D12.3			F08D12.3	P91237	P91237	MSRTFLTIFFCSAVAPGATSSASTCKSPTGPAIGGACAAGQVVIQDYCCWEDDVYKLPAESCKNAFGPAIMGYCSDGQVVVGDICCEAQDVYDSSTATCQEGKSVGPAGAGGSCPQGASITKGSVCCWNEGIQDAPASACKSSASPAILGICPSGQVLIGNYCCEAKDVYDPSTATCQRGYEAGPYGTGLTCPEGTSPTTKEAVCCYFDGIQVLSACKSSAGPAVFGSCPPGQVVVGSDCCEAKDVYDPSTATCQKNEDVGPAAVDGACPAGTSLTKGSVCCWNEGIHF	289				osc	1.16	350.12	8							P			SS	1		4.49827		0	20	0	289	6.92042	0	6.92042		0.6537		-17.261		64.0236	41.2479	51.1349	61.3854	95.2346	25.0504
6241	6302	WBGene00018025	F35A5.2			F35A5.2	Q20006	Q20006	MNAVSLALFLILAVSMIQGLTLVIKKNRKYNNPPFCFAYNREYNDNDVTSSCSGYQFDCFDSAGSQIGDVKTFASSDCESMSVFRSFSDADFQKRLDEASKYATTIEASGN	111				osc	0.84	345.73	8							P			SS	1		0		0	14	0	111	12.6126	0	12.6126		0.0712		-15.136		49.8428	46.9909	12.3164	67.1408	85.6915	73.5986
6604	6665	WBGene00018303	F41G3.10			F41G3.10	Q20289	Q20289	MLFQLLIVAASIGISVQQLGCNSVPMPDLNGACPPGTTLIAGSGCCPDGDVFTITTTSTAAAAVTTTRTSVTSGTCVDLTNPSTGTSDCTRMASYCFNSFYLTLMRQQCPRTCGYCTGTATTTRTSTTCVDLTNPTTGVSDCTRMASYCNNSAYITLMRQQCPRTCGYCSGSGVVTTTRTSTTCADLVNPNTGTSDCTAMRSYCNNSAYATLMRQQCPRTCGYCTSG	227				osc	1.84	350.4	8							P			SS			26.8722		0	53	0	227	23.348	0	23.348		0.1821		-9.941		58.0201	41.2479	37.5289	80.7738	94.2127	52.1322
9059	9118	WBGene00018492	hpo-26			F46E10.11	Q9UAV9	Q9UAV9	MKLAILFVLIPLISANMRDTASVSQESTEVARPRPKRQIYYLCGNFPNQYLSLTPCNSGCSTCNCNTATCSTSSYCQQIRSNWRCINGCCRVPNYEPTLPPTTTRSPVNPNPVCGGRETSGGYCRSGNVCGSGYMCNDNNVCCRCSYGTSIGPCVNGQCPDNTYCSPTNNCCPYLVSG	178				osc	1.85	330.03	8							P			SS			11.7978		1	35	34	178	0.561798	19.1011	19.6629		0.6141		-8.188		72.5915	41.2479	49.2901	92.6848	94.8858	66.7281
16084	16103	WBGene00020678	T22B11.4			T22B11.4	O44561, H2KZW6, A0A1I6CMA1	A0A1I6CMA1	MGFKLVALSSFLLTVSALSIEHNTVGGGCVDLLCPDTATHHGLRNLVNDETLKTDACTACSQCTENGYSVCLRPKDSRASRTAGGCTCAHTLAANCHTDLAQTQHPANLSMKTYSACYADALQRPPQPLAVNENSSVVVTIEPFWLEPYWRHLKIENVTLHYKFQVKAPEHCEGEVESTPTGVHTCVASVLVDLSESKEDQPQVKDDDDEYDHSDNYDQYDDDLPPEVQFDRDVFSGAKELESYYTATIRRARQIKASASKDQQIYDGETIIESEHLKFDLKPEVYTADGSEIVDGPPQEDALPGPVKDAEETATVVQVDKDEGDVSEETGGTNFFEEEEKKEEGETKKEESSEEEDGVLKVNLEDIEPTKLKSQEDAKKKEGDEEEEKDEEEAETTTV…	553				osc	0.63	318.76	8							P			SS	1		24.774		1	269	183	553	15.5515	33.0922	48.6438		0.7842		-11.629		58.6097	72.5473	79.0813	15.0454	20.8401	43.5077
10167	10225	WBGene00000061	lgc-11			F48E3.7	G5EGR1	G5EGR1	MYYKISYLLSISILLFFAKCEKVKNKAVEKKDDRNERELAKHLLDDYYQYTRPVRNYSSVLNVTVQPQIYNLVEVNEQNEQIKILLWFPQSWKDDYLTWDPKEWNGIERIIIPKSQIWIPDGYIFNTVEETEPLENHNARVRYDGRVEVDFNKLVDLTCPMSVLSFPFDVQLCALQFGSWSYQAHAISFNVLDTFVPKKSKNSEWDIVSFNATKMTTKYGDTLGGFNVYEEIFYYLELRRKPLYYIVVILLPSFLIVTVSNIGLFTPHGVHGDREEHVSLGLTTMLTMAVILDMVTGQMPRSSEGIPLLGMYVLIEFVISVIAVLVSVVIIFAHERMLYLDATPPYWVCKLFSDDCKMSLEEIEEDFCSKPADLVQELRFCMEEIKRYLDEQDSTEKNR…	434				osc	1.32	308	7		1.95291	1.70981	0.00994053	0.00987838		P			SS			7.14286		0	36	0	434	8.29493	0	8.29493		0.0066		-22.118		4.48538	5.55392	1.39769	17.5313	5.61287	36.5488
320	387	WBGene00000138	amx-2			B0019.1	Q9XXU5	Q9XXU5	MLRGWWIFIWAAVCVYAQNTLSQQSQQQQQPTSANISSSNIQQTIYDVIVVGAGLTGLTAARNIQQNRPGLSVLVLEARGQVGGRIRYATMQTRNGVEFVDTGSQFISPTDTQLLSLIQELNVRTTQQLTCGNNTVFQQTRKKRQLSLQQQWSTTLFTDLINSPETLGNLTNTSVSAMSQQMDTADADSVNRMMQTFFDAPGEQVPEIQLALTCSSQNATAVEILRRFGHGQSLLAQGGMNEVVRRLADGLLIEYSQRVVSVNDAAFPAVVQTSAGRRFSGRQVIVAVPIPTLENIELVPAPEAPFQQLIQNYGPTGHAYYFTMSFQRATWRLNGRSGKVIYTSATGPLVWLTTFDTTFAASCDNSTSASSTLWGIAHFSYDVPFETRRKLYTQAIMYS…	724				osc	1.48	279.22	7		5.15087	2.5448	0	0		P			SS			11.8785		1	122	42	724	11.0497	5.8011	16.8508		0.9536		11.846		38.4083	87.0032	49.9312	26.4309	85.6915	6.77475
4722	4784	WBGene00001133	eat-2			Y48B6A.4	Q9U298	Q9U298	MTLKIAFFTLILLVSIERVYSSDEEYRLLKDLREGYDPVERPVADHRKPVNVKLRLILQQLVDVDERNQVITLVVWNQYTWNDYKLRWSPEEYGNITTLQIPHGTLWKPDILLFNSANEHFDASFPVHMVVSSNGDVLFAPPGIVSFSCSLSMTWFPYDQQVCYLKFGSWTYGKKLDLQIDDSDLPDGHKMDLQYYIPNGEFDLLATPAFRKSTTFLDETYVELYFHMHLKRRTMYYGLNWIVPSILISLSNILGFTMPPECGEKITLQITNFLSVMVFLAMVSEVAPPTSESIPIIAAFFSLSIVILGLSICASLIIVNIFFRHPKTHRMGDWTRYVFLEWLPWFLLMSRPEHTFCRPRREEEKNDEEAGGDGTKLLENQQHQPRPRLLVNSQLVMDS…	474				osc	0.94	294.9	7							P			SS			1.89873		1	66	46	474	4.21941	9.70464	13.9241		0.0086		-18.039		9.54802	8.82093	14.4461	26.4309	6.37436	52.1322
11176	11226	WBGene00003524	nas-5			T23H4.3	P91828	P91828	MDIKQLLLSIILTVSVVNGRGRRINIYGAENGKSDIVQLRGPAEQLVYSSPIRERRPIFRNALLSNSPLRWSKMQDLDGNYLIPYVISGNYDTVERDTIKTAMEKIANNTCIRLIPRTNQPDYAEINNKKGQGCYASIGRFPGKNVVMLESNDDQSCIQEDTVIHELFHVIGLWHEHMRADRDAFINVLYKNIEPAQYPQFEKLSSRDATTYSVPYDYNSVMHYDENAFAKPGKISMMTKDSKFQKVIGHPKDASSNDYKKVCAIYHCSKCMHQDFQQIVEQEHIELNNPIITNAPVQQGDSCTDRLGICPMLKSREMLNCKVMATFCCSSCSAPTSTTTTTSGTPSDGSLWQRIKSIFQ	360				osc	0.88	297.88	7		15.254	10.5338	0	0		P			SS			9.44444		0	62	0	360	17.2222	0	17.2222		0.0392		-17.67		42.8814	61.5279	39.9975	47.2366	22.7684	37.6738
1200	1267	WBGene00007340	C05D12.2			C05D12.2	Q17657	Q17657	MTTKQWCSIIFIVVLVFLQEITCQSAKCQNFGTPLNSTDCKCPAYVDGKLCENIKCQRWSVPDKNRCACAPGWYDRYCGLRGCRPPNEEQMDLEKRSFIIVFNTKTTMKMQLDTLMKNFKEMISRVSKNPKGVMDNWIENFIIYGFVQSQSNTKIQKLFTENPDDVISFFNNMTLSDGDDTQPVLTAIQNAQQTYPKMKSHALVLVFTDSTSSDATAWSHRFTDKNSEQSVLQISLLWRSKYSFFLSLPSPANFSSNGVDVYRRLSLTNHGDTFFIKDSKDLSNALLNVIGVQYFPENVQVGYGKTADEQLNTYVDNDGDLAYILLTIRPSSQAEIPSIDEATTVAEGDSYRLYSRASKIGDTVTIFCQNGTTYNYRMFIQSKNTLLFNYNDDMHIDVG…	1036				osc	0.71	311.73	7							P			SS			0.965251		0	3	0	1036	0.289575	0	0.289575		0.2756		-2.003		7.45517	64.7187	49.9312	8.31737	2.16163	8.79882
2519	2585	WBGene00008073	C43F9.5			C43F9.5	Q9XUG6	Q9XUG6	MQHRIMMFLVLFSVIPSIFGLTELGIRSKRQTHICGTYPNQFYSMFPCEYWTSQTVRNPYTCANGGRKIGVGCYYNYQCTPYAANSVCLNNCCCTNPVVTTRAPIIPTTTTRSVSALAYCYNGQRTQVRCTTSVDCAAGQTCMNGICCTTTGNEYTGSCGGLPAISACGTGQTCGSFRCTSSNYCCECQYGRTAGLCSNGCPTGYSCNSNTGNGYCCATCASGRPPFGSCFNGLCASGYTCQAGNICC	248				osc	1.4	291.85	7							P			SS			6.04839		0	22	0	248	8.87097	0	8.87097		0.9825		-6.164		56.76	9.91894	29.2606	91.4616	92.8126	44.8514
12207	12237	WBGene00009384	piit-1			F35B12.4	Q20008	Q20008	MALRLAVILSLLSFTAAQSTSVDCFAARDSGNTCAENSSSRMFYYLPRLGTCQPFMYQGCGGNSNRFSSAQECRSACTNAQAQRDSESSDETVQMKSACSATYDTDHLTPVRCSAGANTCPQGHNCIQSFCCPTSNYLCNLTYDSGKFAVGGEKSDKYFWVPKYTTCMRFSFYGTLGNANNFPNYNSCMATCGNQTRTSQ	200				osc	2.79	280.9	7							P			SS			0		0	21	0	200	10.5	0	10.5		0.4785		-4.44		63.1123	51.8226	16.9934	79.9165	95.8266	60.5625
20194	20200	WBGene00014125	ZK863.8			ZK863.8	Q8I4A6	Q8I4A6	MTSSFAIFTISALFCIFPYADTLRCHDYTSTNLMKNPMKTWVDCPADAQYCYKSYLESRDFNNDKTFVSGRACGSSNLCIQNGCVGTNTDKACCCRGDLCNSSSLVKLTVSIMTLFAVYFFKN	123				osc	1.85	304.32	7							P			SS	1		0		0	5	0	123	4.06504	0	4.06504		0.0153		-18.548		28.4525	19.2041	6.61263	57.7598	61.1373	65.9175
16840	16851	WBGene00016505	ttr-33			C37C3.13	Q8I7H9	Q8I7H9	MSRLACISSLFILCAIGSEAVFTQSAGVKGVLMCGDKPLANTKVKLYDDDTGPDLDDLLAEGTTDSLGQFLLTGHTSEVMTIDPKLNIYHDCDDGLKPCQRRVTFNIPKSFVSSGENPKTFFNIGTINMQIEFESESRDCLHR	143				osc	1.53	277.06	7							P			SS			9.79021		0	21	0	143	14.6853	0	14.6853		0.005		-24.938		45.7431	29.2533	27.2144	68.3911	54.7015	76.8558
2575	2641	WBGene00016667	C45E5.4			C45E5.4	Q18642	Q18642	MLRFLASCTLIFSITLVSARSSRFTRQADETLTDSEGSGLQFINFDEGSASNPIIARDQEGSGQMYDEEGSGNTLLFDSETPIQVMNVTGTEAEPTDSKVFNQSINITDSDVETLVIKVHLPQKTTSQLLDDLKDDTAQQTNPINTLDTAVSLTSMLNELLGKIQDATTQ	170				osc	2.32	314.37	7							P			SS	1		0		1	42	39	170	1.76471	22.9412	24.7059		0.0458		-16.892		44.7875	49.9312	32.0757	61.3854	62.5817	62.0437
4142	4204	WBGene00017032	D1044.7			D1044.7	Q95QP8	Q95QP8	MILLLTLWTTFVITAFSQCPPGLIPLTSNNNFNQPLTCTPQDPCSCFSVSARYGAICHYSSNYNNYLCCHSQNTQCGTNSSPQVSASGQVVTCFTNSQCASGYICSNGACCPNTNSNTCSTTGTPCFTGQISVGGQCFNSVNIGDRCQRSEQCLGGSQCQNNLCQCPNGFANVNQKCACQLGTVLFNSQCITLASPGQNCQISSQCIDNSVCNNQMCSCNGNYRLVFGYCVPFTNSKCQQTQTLVNNQCVLLSIVGETCIANQQCVGGAMCNSGTCRCTNGATAMYGYCISSQSTVNPCNSNQVYYNGQCYNTVNIGFQCQITQQCLGNSQCQNSFCQCTSGSPNNGICPTSPNTSNLCSSGQTVQLDNNNQPINCLVTVCPNTSFCQYSSSGQRYVCCR	400				osc	1.1	314.56	7							P			SS			4.25		0	3	0	400	0.75	0	0.75		0.8892		9.441		82.083	49.9312	65.9961	96.114	98.084	32.9108
5103	5165	WBGene00017246	F08D12.2			F08D12.2	P91238	P91238	MSRTVLLTIVFFAAVAVDVTASSSACKSPTGPAILDACPAGQVHIMNYCCLEEDVYELPAKSCKHAVGPVVSGTCSAGQVVVGNVCCKVKYVYDPSTATCQEDKDVGFALADGSCPRGTSLTKGGFCCENEGVQILPTSVCKSAVGPVVGKSCPHRQVVVGDVCCKAKDVYDPSTATCQKDKDVGLAIKGSCPEGTSLTKGSVCCWNEGVQFSTTNA	217				osc	0.99	297.85	7							P			SS	1		5.99078		0	27	0	217	12.4424	0	12.4424		0.0425		-28.116		49.5898	24.4461	43.9032	47.2366	61.1373	42.3753
5444	5506	WBGene00017471	F14H12.3			F14H12.3	Q966K7	Q966K7	MFALILSLCLFQGTLSYVIGGGVQANPSGCNVCGDSPQWSGWTEWSSCSAAFGTPVQTRTRLCPSGNCQGGSTTESKPCVLYDPQPTQPQWGAWGGWSSCSATCGGGTMTRSRVCNNGCSTCQCVGAAAESQACNAQPCCTWTAWSSWSACSVTCGSGGSITRSRQCSCGSGCTGGSVEQEPCPQQAACPCTTCNQPPPPCNTCNTQPVVIVTPAPCTTCYQPPACSTCGHAQPFYDPYGNGRKKRMITVSGNSTSA	257				osc	2.14	305.05	7							P			SS			18.677		0	18	0	257	7.00389	0	7.00389		0.9761		-7.825		84.7433	43.4169	62.3999	95.9887	97.1285	72.6971
16064	16083	WBGene00020651	T21D12.12			T21D12.12	O16784	O16784	MLTAITISTIFITFCFAQQQTDCFSARDTGNSGCGQQGARSFYFHKNTRTCQPFFYQGCDGNSNRFQSKEACESACRNATASDDLAYAVCPSGAYPAGATSGQTVGCSNCPHGYECQNQQCCPTKENTCSLQYDAGKFGSSGKHTPRYFFSKSYKNCMLFTFYGRDGNANNFATYNECKNFCM	183				osc	1.5	311.8	7		4.98956	1.61494	0.000233896	0.00577595		P			SS			7.65027		0	0	0	183	0	0	0		0.3102		-5.618		61.0906	47.9833	8.11594	70.985	95.6399	83.7386
17390	17399	WBGene00020995	W03F8.6			W03F8.6	V6CK23, V6CLG7, A7DT39, H2KZ04	H2KZ04	MTQISAIRLAVFFVLVPTTLAAIQCWVGQETVSNGRRLPTEIGGPYQSVQCNDADFCFNSYVRRHKKGDDSYTITKSCGEVGKCFEDGCIGPGDEKNCCCSDNMCNSSNGLIYPTAGILIILSLVFRP	128				osc	2.47	277.52	7		6.36282	3.96967	0.000332684	4.80581e-05		P			SS	1		10.1562		0	16	0	128	12.5	0	12.5		0.0307		-21.673		40.0688	13.1147	11.6581	74.65	73.6699	67.5682
6609	6670	WBGene00044316	F41G3.21			F41G3.21	Q4TTB3	Q4TTB3	MQQITLVVLAVLCSYSWGCVDLTNPRTGTSDCARLASYCTNSVYLSLMRQQCPRTCGYCNSSSSTATSVSSTTSSSSTCVDLTNPRTGTSDCTRLASYCTNSVYIPLMRTQCPRTCGFCTSG	122				osc	1.29	306.61	7							P			SS			14.7541		0	18	0	122	14.7541	0	14.7541		0.7187		-14.341		53.0091	28.0619	39.9975	74.65	87.4011	73.5986
8593	8652	WBGene00001715	grl-6			K10C2.5	Q94273	Q94273	MSTLSVAVFLISFHFAFAQYPFGRGGCGGCPTPMCQPRMPCAAPMPMPMPMPVCPPPPPCPAQFCPPPPICPPPPPPPMPCPPPPPPMPRPSCPCMMQRPSFYPSYVPQYYQPMMPQPMPTAGGCGGGAVVPSVRIPAQNDCCCGCSSPCKYKSVRRAAFAAKTIDPSCNSSELKNIILDNISEDASESKRNIQKIAEETLGHEVNVICGTGEFSYIAHTDTFCQAFKEDVTCYAFKPLQ	240				osc	2.07	252.4	6		2.49117	2.27318	0.000417178	9.17865e-06		P			SS			36.6667		1	168	168	240	0	70	70		0.5314		4.016		81.1349	60.8008	38.3616	95.7062	55.9445	94.4928
11145	11195	WBGene00003520	nas-1			F45G2.1	O62243	O62243	MLPIVVSILLATPLALCQAPFWMPNMQQFSFLTETDFRNALLLPTTNTRRVRSLYHDMRIPFQRFKRGGGVAVAAEKDKWPNGRVPYILSAAYTSAQRAVLARAFDTYAKRTCIRFVPKSPADKDYIVIQKLDGCYADFSRVGGRQQVSLADECIDYATIIHELMHVIGFIHEHQREDRDSYVSILYQNVIQGANTDFDKLSNLGLSYYGEHYDYSSIMHYEANEGSRNGKNTIEAKNSHFTAIMGKASDFSTSDLRRVNRAYKCSIFAF	270				osc	2.91	259.22	6		13.3868	9.86556	4.55129e-05	0		P			SS			0		0	19	0	270	7.03704	0	7.03704		0.0105		-10.125		24.5763	46.9909	4.98649	43.2302	48.703	47.2759
2265	2331	WBGene00007911	C34B7.1			C34B7.1	P90769	P90769	MLRFLFLLNFAFLFSEAIRCRSCYSYNGQACVNAPDCESDVCLYEQLNAANGITHVLRTCYTKGKAYQFDDGVTMSNLNQCVTRTTRQGQYYVALCTTQDMCNNDCKTQTQPTLPPVNPTPLLGSVTCYECSTNDGTDCQTNTCEGAYCLYERRLFNNQMYLRKSCLIEPTIQLDDETTVASVGLCEVRNTVNSRYFVKICNDVNLCNNYCNPGQTPPIPQRQPLVRCYDCESSDSDCFTGSCEGNFCIFERQLRVGTTKTYYRKSCSALAYAQYPDGTYTGVPNVCNFRVINDVEYNVKVCNTGNLCNSQCTQDTSAVTCTECSAVNSDDCSGGTCQGRFCTFVRSKNQLDPTKSTVKKSCATTSILSFPDNSAYTNINHCQYKMAGSIQTAIKACNT…	440				osc	1.4	234.39	6							P			SS	1		8.86364		0	19	0	440	4.31818	0	4.31818		0.7199		-9.104		43.3898	66.4456	25.3918	63.6281	70.8843	46.674
5656	5718	WBGene00008967	F20B10.3			F20B10.3	Q19618	Q19618	MTRRFALIALLFALTSAQTTTQSKQISLDPNAGPLKLRIVFQSEQPPQVQQTPCSTGNCQPTPTLSPCASGNCGSVQPVQASPCSTGNCGVTQQASACSTGNCNGPVAGSANVVPVFDASIYTTTTPMPIPIRTISSNTAPIKVIRVPSYSNSNNGCFSPPCGAPRFIFAQPPCFGNSCGPRFMFPRRRHFFGPRPIIIGNRNNGNINAGGNVAVPDTIYKNGMAIRAPIRVPSSYQDGNPVFNSGK	247				osc	2.8	234.26	6		4.59421	3.5114	0.000315418	9.17865e-06		P			SS	1		27.9352		1	54	35	247	7.69231	14.17	21.8623		0.8114		1.743		84.8637	63.4807	39.9975	92.9526	88.17	81.4419
7043	7104	WBGene00009916	F52A8.3			F52A8.3	Q20635, Q6A4I6	Q6A4I6	MWRFNSSSSIKSIMLLLTVFIMMANCEQSEEVLTRSKRSYYGGYDMYGLVSSPIIAQSAPVPIPVNYDNIPGNANYIQHTRQAPRQIHVDSSPRDSEISRVMVPGDQVMFSAEDRYYTSSTAPATAHRPDAYNVSRY	137				osc	1	231.45	6		1.95638	9.45651	0.00213796	0		P			SS	1		5.83942		0	16	0	137	11.6788	0	11.6788		0.0215		-3.067		65.1928	62.8224	13.7141	85.5809	68.1037	63.5004
8677	8736	WBGene00010348	H01G02.1			H01G02.1	O17902, E3W759	O17902	MPSTVPSLLLFSLLMFNMAGACHSFLPYAQYVGARAYILQQRMECKGGKVYDIDNVQDIEQCKEACRQFDCDAVNLFQVGEFAFKCEILSFVSNLQPANGAACYYAQDAVGAGGNNNYNGGFGYPGYGRRK	131				osc	1.54	269.02	6							P			SS	1		23.8095		0	24	0	131	18.3206	0	18.3206		0.0818		-5.751		42.8814	26.8902	10.4274	63.6281	93.7436	59.7765
12554	7	WBGene00010987	R03C1.1			R03C1.1	O17977, B7WNA3	B7WNA3	MSRLSSLLILVCIGALLVETFAAPDEPIIVRSKRQQCRCVKNPNGGLTCSCAKGPADGSSSSIGSGVQYDAPQSADIANQLTAMSQQTTGMSGARCGCIQIVIQGAPQYNCQCGDQSGNPLPTTTTMAPTTSSTTTTTTTTTQAPTTTSTTTTQSPVSYPQVPTQTQGSNGACNCIMISITSPQTAQYQCQCAQPQQQQQQQVQYDTYEYAPVQTTPTPMPTTQVPTTQAPTTQAPTMPTSSSPVQYADTAATQYPLTTTCVMYVNVPTTACSCLPQYDQCAQNVCCLKSKFRSYKKAEETQPSTLDVLMNVLQTIKTKLE	321				osc	3.25	248.22	6		37.4979	30.5355	0	0		P			SS	1		28.3105		2	139	122	321	5.29595	38.0062	43.3022		0.949		12.25		74.8072	70.7566	39.9975	51.663	90.0909	58.9929
12815	12843	WBGene00011227	R11.2			R11.2	O62346	O62346	MRVLTFLLVTLFALANVMQAQRYDRAIYEALLNDLEREFVERELAQHVLEKRELLRQDRQELDRVRRASEKKSYPRNCYFSPIQCLFTRN	90				osc	1.77	263.93	6		21.3746	20.8316	0	0		P			SS	1		14.4444		0	26	0	90	28.8889	0	28.8889		0.0062		-38.61		38.988	30.5036	15.2395	70.985	65.2837	77.6026
7395	7456	WBGene00018937	F56B6.6			F56B6.6	Q22996	Q22996	MTRTLSTFLLFSVLVFKAYSDCYFAFLQASGACSSDSDCGGAPCVMDVKAGSHVCCKPKPGTTAPQCPGGMTYSGIPVLCDPADGDDGCPAGSTCSTSTTDFTKDSASPNSLCCKS	116				osc	2.14	260.25	6		7.51886	4.17334	4.55129e-05	0		P			SS			34.4828		0	8	0	116	6.89655	0	6.89655		0.1547		-20.168		63.2793	30.5036	32.0757	86.8435	91.1275	91.0931
10437	10495	WBGene00019721	M01H9.5			M01H9.5	Q8MPT9	Q8MPT9	MRRLLIVLTTCAFTDAIGTMLVQGRADTIRTLRDIVRNSAHPPTSLHRPLHKETPERLSTPPGMIINTENPIPHLSKKLKNAKRHVKFVGKARARRHIGNVVVESGQCDHVDLMDCSDFETDEMTCMLTATGMTCCVCTGLLRAAKRSLF	150				osc	2.01	225.34	6							P			SS	1		0		1	61	57	150	2.66667	38	40.6667		0.0129		-24.971		41.9258	25.6988	22.4662	75.8217	36.7109	76.8558
12168	12198	WBGene00020242	phat-5			T05B4.11	O16420	O16420	MIAIISILFASFLAPEVSAAIGGDLNCTVYNGTMFVWTPAAVACQNTISDASCAILYPTTDTLGLPAAGNAAGRPLACYTTATVTPAAVVLDMKTAALASCPKTCGFCCNTDAFNCKNADYPRLNCATITNSQCNSPAWRNIIAADCPSACGFCGQGGCVDAVTNCGNDLSICQNIGMQSFVNTYCQKSCGRCPSTTTSGYNNGGGSCTSYVADSSSNCASWAKNGFCTNNFYTVDQRRARCGSTCRIC	249				osc	0.74	229.32	6							P			SS			11.245		0	30	0	249	12.0482	0	12.0482		0.8189		-2.038		25.1781	34.2913	5.52198	46.2073	93.1589	24.6622
16269	16287	WBGene00020803	T25E4.1			T25E4.1	Q10014	Q10014	MFGKILTTSLLIAMTFAAPSTEEGKSSKRRQYIAPLAGAAQVPRNPLFFAAPALPVAAAPALVRPAFAPVPVAAAPAFAPVPVAAPMVRPMLQQPAIVAPVAPVVAPVGQCPGGPSLPIECDPKRPWPQCPPQSYCYATNSVDIGPYFCCPIWSTYGAAWRPATPFYNYVPPVPANWPDVARMTANWPAAAVAMPLKARKQQKNEGDDEETEDEQKIGSAIDGWVERQAKL	231				osc	3	230.73	6		19.556	30.8041	7.79487e-05	0		P			SS			30.303		1	120	100	231	8.65801	43.29	51.9481		0.0909		-10.979		71.3412	77.3274	11.6581	52.9452	92.056	67.5682
16398	16416	WBGene00020893	T28C12.6			T28C12.6	O16699	O16699	MIQLLLVGITVVGSQHMTLCDYYEKLGIAKSECGHIIKPQKDIGFFNPPSYDTPNNFRFNSYNPSSNNVNPQFNVFRSYSNDLVGSLPLCRNYFHSCMTSTSCESGTICTNGLEQGSCCTNPSQASCPSVTSMNINCRKLRSVNWCNNDFDCRGGSTTASMCCPTGCNYNMCVHVGAQVYHPRRSVVFKSLSTAATTPDQCPDPYQLGVKCVAARGSNWCYTDSDCRSGLYTRKCCATNCGYNTCVMKFNDKWIIA	256				osc	2.41	225.59	6		13.8629	5.75606	4.55129e-05	0		P			SS			4.6875		1	44	31	256	5.07812	12.1094	17.1875		0.416		2.116		67.772	57.3888	39.9975	79.9165	85.6915	80.6706
17530	17537	WBGene00021083	W08E12.2			W08E12.2	Q9N5B0	Q9N5B0	MNSISLIALLVLVAGASAQCFGGGCGGGCFGGNCGGCSGNNCGCNGNNCGPQVTVVQVPNNNNGCSCNPCNGGGCAPRCSYCPNNFGYSSCCNSNNFSCCGYRFRRNIVKAIETSAEPTN	120				osc	2.02	247.1	6		43.9817	47.5278	0	0		P			SS	1		62.5		2	95	78	120	14.1667	65	79.1667		0.9811		6.883		71.3412	32.9894	27.2144	91.4616	96.7158	60.5625
19063	19070	WBGene00021984	Y59C2A.1			Y59C2A.1	Q9TZC6	Q9TZC6	MWSHTLVPILILVTTYGVNCHENSGEKRADYSGYTLHRFKVDTSSDTMEKLEGYDMQLDKTTQTARLLIDIWAEPSKQNPYADILVAPEFLQKFKSLLTSAELSTLKMLEGDIQSQINAERHAMIRNSVRRRKRAMKTWQEFDTNAYHSYNEMVEFMKLLSEQKSDMVEMVKVATSSEGRSIYGVKIHPPGPSPPEKPSIIVDAGVHAREWIAPAVGLFMIRKIVEEYGRNPQVTANLQKFDWYIMPQVNPDGYEYSRTTDRLWRKTRSKNVTVNRWCVGADANRNWGYRWGEAGANRTPCSNIYMGSHPYSEPEIRGLKEFFTWQITNPMVYISLHSYGQLLLSPWGYTNERTENYQDQQNAAKEAAQAIKNTTGVSYSYGTISEMMYPASGTSIDFM…	454				osc	0.89	264.78	6		1.69016	3.08317	0.000139134	0		P			SS			2.20264		0	36	0	454	7.92952	0	7.92952		0.016		-5.885		29.0838	67.5215	7.33972	54.1341	65.2837	31.3731
2314	2380	WBGene00044016	C35A5.10			C35A5.10	Q5FC62	Q5FC62	MAKIFCMLVVLLVSSSFCSAKDLKRSKRQMQVYYMCNGGVSQYPCNSNNNCNNNNCNFNNYGNQVILPSSFYNPNMNCNSNCNNLNCNQYSGSWLNGQYVAYNMGSNAYSPCASSCCSNNNNNYNPYINNNYNGNYNPYGTSNGGYNAYGTIPVNVNVPSSSTNTNVNQYLPYGAQQFTGTYQNGQFFCGATEPSGGVCRNNGVCPSGHSCVAGNVCCRCPVGSSAGNCILQSDCSAGYECMGTGYCCPSQVLSTTKLGPCVDGACPLPGYTCGVGDLCYPDSYFL	286				osc	2.67	226.46	6							P			SS			34.6154		0	25	0	286	8.74126	0	8.74126		0.986		30.525		83.7829	66.4456	55.3967	97.5117	97.7106	55.4041
11148	11198	WBGene00003531	nas-12			C24F3.3	Q9XTD6	Q9XTD6	MLYIPQFSIYFCLGYLLLFCKISNAVKQSWEINQELITEANKEHTVFGDMLLTPAQLIRYENSKDSDLSIRGVSIKGSSMNRWSNNIVPYVISPQYSPAQKQILVSSLRYFERVSCFKFVERTTQNDYLFIVPLDGCYSYVGKIGGRQTLSLAADCIADYIIWHEMMHAIGFEHEHQRPDRDSFIRVDYANVIPGQMINFDKLKTSHVEYPDIYDFKSIMHYDGYAFGRVDTARRVRLATMTPLKPGVTLEDNMKFTATDIEKLNRLGQCGARGGQYSNQGVVASTCQDVATAVSCEGNRRRGMCKNPFYKQMMIKSCQKTCRLCSYTRMIDEDDDLTPNTTVKSVKCEDKHPRCDIYSHNGFCTLPFYDDVRYQLCAKTCNLC	384				osc	2.11	209.68	5		2.59929	2.15616	0.00997393	0.00512903		P			SS			0		0	73	0	384	19.0104	0	19.0104		0.1672		-13.717		26.6446	48.9266	7.33972	54.1341	31.9725	39.9067
11942	11986	WBGene00003879	ora-1			F57H12.3	O45098	O45098	MISNIFKISAALLLLTIVSEAKPCFGRCGGRPPPPCGLPPFLEDLPSDVQTKITEIWKDYKEGDKCYEEQGLTREIMESLPKDVRKSIHKRPPLPFLRGLPKDILAKFDAIFKDKSIPFSEKPEKIDALAQEVLTGDNLKKFQEFKEKKEKEMQEYKDKESKLSAAAKVANEKLEALGKQKFAILEELDENVKDELFDLWKSRPHGPPRHH	211				osc	2.93	184.18	5		5.8101	21.7022	0.000644843	0		P			SS	1		19.4313		1	42	34	211	3.79147	16.1137	19.9052		0.2264		-38.495		59.0518	42.3041	46.0599	50.4888	55.9445	93.859
1817	1884	WBGene00007687	C18E9.7			C18E9.7	Q18096	Q18096	MFLLIFLLASYNSIASSSSILVDFTSHAIQPTPQAYIIEYSPPVGYPPSGSAVEGTTFYSLINGTISATDYTVSISAILMDGTRQNIGELTVFSSPDAPTLDSIETTEHEATISYFPPQGQNITYHMEYYPEEHKEYTNPIDTKTALVKLRGLDSGTTFRLRIRSVYQGVLSQEFIDTTFTTQGTANYDYSSSAEQYSVKTLPPNFNIGLQTTTEMTSYEYSREVEEDPTITTPLVAVTTTFTPPVRETVMVSTTTAESSTTSTIPEVTETEVSTTEVTLQKETTTPRRPTTTKPKASPMEVNSGDLGEDHPSENTNVLVDLPEMIKEYGEPSEIWLSDENEMLRLDWEAPENANCEAFFVNYTILTLSRPRSFSLATSDENANIKMFPEHTLDIRVFC…	893				osc	1.81	182.22	5		3.76585	7.24226	0.00310996	0		P			SS			14.2217		0	39	0	893	4.3673	0	4.3673		0.3739		-10.449		10.0319	71.1938	38.3616	4.97175	1.9774	10.7566
10074	10133	WBGene00008047	lact-7			C40H5.4	Q9U3M7	Q9U3M7	MRLPLLPLSPTIGVLIFVFLSIKAGTAEQLDLNAHYHGFASSKRINAYPYTAPERVVEKAISRKHKKPQATSPRQPHEASSTVPSGAAADPANTAADFGMQGGMQGGPMNPGMMSNRLPPLQTVHPPAPNEKDWVLTAGNESLVDNVLAISLQYGGRLVSMGYYLRGQDVNYYAIMHKYTGPVFIKPAPMTFDELIKAVRENEARDLALTQVCGQEGKPGEITFTTYWERVPGVEFHIWFPGQPHADEQKEHFENNGYRLTYLCGYSEAGKGKYVGVWQKPVKSEAQYEAHYGLTMEACMQKDKILVQKGFVATSLRVFNNKNQVLCTGIWENRNGRSSVQVGQNLETMYRNMQRNPNMIPRQMSHYFDNYQNIVYVVLWSDVDINRYPNPAPLWDEAP…	808				osc	2.5	214.04	5		2.7283	2.31925	0.00046312	4.90347e-05		P			SS			4.9505		1	67	49	808	2.22772	6.06436	8.29208		0.2139		4.554		47.1334	73.8172	43.9032	45.1511	34.8219	24.6622
4658	4720	WBGene00008449	E01G6.1			E01G6.1	Q19021	Q19021	MRWCTLRHLFSISTLVILANAGLECDPTSNVKKPDPGSPESYLYCNLEGSFSKRKCASGKIFNSETGECDSLMQADDPIDDIFSQPFFQAPDDLCGEGIPLTILSAPVTCNPSISSCPDGYSCQFYERTGSSYCCQNPTPTAKSSTDKINCGEGRVTYIEMATGKPRSCVLTGDNSCPAGFGCTLVAGTTTRCCAKDLGCATNSAPQLRGSNPVECSPTDGSACKNGYVCSKSQYLNKFICCSNPDGEIMGSCPGGETPLENIQCSATKPCPNGFSCNDKKCCPYASACPAGAPLNNGPMKCSENAPCPEGHSCVSNAGIQYCCPAKEKVCNMPRNSGVQCASSMKSSNRYYFDIGTATCRSFKFTQCGGNANNFGSLEECEGFCVDTQCPNGQAHRVG…	1467				osc	2.85	198.73	5		6.54678	11.1526	0.0010468	0		P			SS			5.8623		0	4	0	1467	0.272665	0	0.272665		0.9749		13.088		98.5753	96.4677	95.4999	99.1845	97.9735	77.6026
5851	5912	WBGene00009099	F25B3.2			F25B3.2	Q19769	Q19769	MVFATLLFNLFLLISADLDQGYGFQTGHISMNDSEITILINSTFEIIEDFDNETEISLSKSTESSETPSTTPLPPLNITEKSVKLPVRMKKLRPSTNVQCQKYTEAEKYKLLEDAGGRNQLFMADSVDEASQNFAESYTPNPLGNTLGDAVFVAHFQQTNPCDSRCQMIKAALNGEISRRSSSPSNNTTNPFVRVFGRLRASVFSDAHPTVPGNCALGNFIPVGTCSDLGETIDGGTHESLCSECRGLYMLGANCFPKIFNTVQCNSQEMGCIFDTFTDKAHGQCGIQTLSFKVLRNTGDDNCEDWIVEQIQLPVACQCSLSKSSFLRAKPSKEL	335				osc	1.29	208.04	5		2.4069	2.40539	0.000908033	3.05729e-05		P			SS			11.3433		2	104	80	335	7.16418	23.8806	31.0448		0.3964		-5.149		62.4146	60.0197	46.7207	68.3911	49.8624	68.4107
10530	10588	WBGene00010917	M110.9			M110.9	Q7YTL9	Q7YTL9	MIKNIAIVSVVFCAFVSTQRAPSTEVIDKILGSAETKTIEQINKEIDKLVEKLDEKTKQEHKAWKLRVEKDERERKSRIFKVLPKLSTRTQQKLIRIVMTQQNQTLSVGEKERILRHISTSMDNNTKNELARFLSDKDLFSLIY	144				osc	2.47	186.16	5							P			SS	1		0		0	0	0	144	0	0	0		0.014		-26.85		36.4112	26.8902	26.2442	49.4154	58.3296	61.3142
10547	10605	WBGene00010926	M153.3			M153.3	Q21546	Q21546	MHKIILITALIALVSTEMTMQMIAYKATKTPCCMDTLMPNVCKSLYNRDHEKFTKQCRTNPDFSFIQCCHSCHFNMDMFTSDTIPVPADLYQHDVEELLLRHHPQNCFDRHGTQFCEAFVTRSGMWGRKSLTCQHSVFAFRVCRKTCGFCASVNKTATVRYDSNLAKNPKACERLF	176				osc	2.32	200.47	5							P			SS			0		0	16	0	176	9.09091	0	9.09091		0.1013		-24.25		35.7652	25.6988	9.35888	55.2788	53.4095	82.2574
15624	15644	WBGene00011551	T06G6.12			T06G6.12	Q7YWV1	Q7YWV1	MRQFTLILTTLFAIFLTFHSAHARFERVGFVSDPVQLLLRDSYSSLRNKMYSQKLAGWKKPASFRQIRKRKYTAFPPTFYSSFDIGAIPFNSRRSVLLPYNDLLFSGRK	109				osc	1.3	197.78	5							P			SS	1		13.7615		0	4	0	109	3.66972	0	3.66972		0.0071		-16.053		53.4537	26.8902	15.2395	79.0494	68.1037	93.439
20085	20092	WBGene00014039	ZK662.2			ZK662.2	Q94406	Q94406	MKLTAAILCSIAFATTFAADVSEGHTVVAQCKCSDLDECADAIATKTNNCKKKAECTNFLKEIGDATKIMACLDADHEQMMKVEACAKKKLNGELGCTNSATPVNLTIPLIPVIEIPSLEESGAVAVGEQASGQAEPPLQLRQYLMCIDECTHDDMEVIPGRKKRSPATCAFKLKCALAPPSDSTQSAYTECQKELGYDPVKGAADSCKCLKSAGVNMTCPN	222				osc	2.33	200.38	5		6.32142	88.1703	0.00193098	0		P			SS	1		0		0	39	0	222	17.5676	0	17.5676		0.0138		-26.274		30.6706	49.9312	15.2395	35.3918	75.0725	41.7416
652	719	WBGene00015142	B0310.6			B0310.6	Q10942	Q10942	MLRVVLFAAILVFSIANSEIIDKSLEQSGPIQDSSNFALAVNGEELPTDIALEGQSEVMIRAKRYYGCGCGCGCATVAAVSPVPCGGCCGCGYGK	95				osc	1.16	224.48	5		5.79734	13.5168	0.000270166	0		P			SS	1		16.8421		1	53	36	95	17.8947	37.8947	55.7895		0.0715		-23.961		53.4537	18.3837	15.2395	79.9165	90.0909	65.1363
1971	2037	WBGene00016130	C26B2.8			C26B2.8	Q18197	Q18197	MLNTVFIMLLLPAAGLCARYNSHLVKGWSNSDCVRPWQQPLMSKPTLRIPSRAIECHPEEHDCPTGRNAVCQYSLRSQKYVCCEDKKDADIPTCPKFYETLLLPCGNSVDSQCPRGYRCLGSLGDDSVKLCCKPNRTLEYREPEHTFRENRIVPRLLPVAPAYELIATFSDEQISMGQLFDADILDKLADPPVMSAGVELQDEKLYTIILADATSKAVTWLVANIAAFDGQLEIHRRTKSAVSYQPPDSTDRPVGMHTMILALYEQNDTWTQKDLARIAMDDFNFTEWLEEYAHVLPAQALAATFYGYSTKKDDRKRI	318				osc	2.83	211.91	5		9.1975	6.8023	0.000417178	0		P			SS			0		0	19	0	318	5.97484	0	5.97484		0.1582		-23.329		36.5831	58.2486	40.8622	55.2788	38.6441	61.3142
12165	12195	WBGene00016733	phat-2			C46H11.9	Q9GYJ2	Q9GYJ2	MNKSIFLVGAFLAVAFGQTCSPDRITAPCDVGLPCETGSTCDLTLLSCCLNADLITTVVPSNVVTDASGSTVTVATTIRSGSTVTSRTSSGTGCVDRVNSATGTSDCANRRALCNDANYFDVMTQQCPKTCGRCSSFSSTPTTGTCTDLKNPKTGTSDCASLRSFCNDSNYIDLMRTQCPRTCGFCGSSGSSSTTRSSATVSSGTCVDRVNPATGRSDCASNIGLCNNSAYQSVMRAQCPRTCGFCTSG	249				osc	1.69	190.5	5		2.44064	3.82889	0.00268282	0		P			SS			19.6787		1	95	35	249	24.0964	14.0562	38.1526		0.2084		-11.507		66.3031	61.5279	53.0386	79.9165	79.0027	41.7416
4240	4302	WBGene00017073	D2096.6			D2096.6	Q19005	Q19005	MFSKLFTTSCLVAIALTTAQEEVSGKVSSTKRRQYVAAQQPAVPVVAPVGQCPGGPSLPIECDPKRPWPQCPPQSYCYATNSVDIGPYFCCPVWSTYGAAWRPATPFYNYVPPVPANWPDVAKMTANWPAAAVSVPVKARKPTKSDDEEEEVGKMGGISSSINSWVQRQKL	171				osc	3	221.4	5		24.7765	42.6609	4.55129e-05	0		P			SS			12.2807		0	60	0	171	35.0877	0	35.0877		0.0613		-13.682		75.3378	59.1697	17.9317	87.4159	90.6411	80.6706
10355	10413	WBGene00022789	lron-2			ZK682.5	Q23580	Q23580	MGLRAIILATLVVTVYGQCPALSGACRCAPSVYEPVAIICQNAGSLQNAIQAIQAARDIPIDSLTILDTAIPTIPANAFQSFTILRLVLNRNTLQNIDDQAFNGPLLDSLIELDLNDNNLGQIPQTGIPRLRNLRKLYLNRNRINQLSSTAFNAFESRDLLLKLELAGNRLTDATLGDATVFRPLTLLQELSLETNSLTSIPSSALVNQRNTLTNLNLGLNSINEVPVGALDFPVLSSLSLEFNGITVIPPQAFQGVPNLQFLYMTGNKFPSWAPEMFRYITQLKTLGIGETPISVIPNNAFMHIPNLIRLEMSEAAVDTIERGAFQRTPQIQAIVLNKNRLSQVRADFFEGLNDLYSIDLQGNRIDNVQPLGFANLPAISHLDISYNLLQTMPSNVFQ…	575				osc	1.83	220.45	5		5.12308	22.9008	0.000233896	0		P			SS			5.56522		0	23	0	575	4	0	4		0.0231		-5.477		14.5198	60.0197	4.73594	67.1408	27.8261	16.5586
15897	15917	WBGene00043981	T14E8.4			T14E8.4	Q5WRS0	Q5WRS0	MRLLFFFSILYTASLCCQLKDFLPCVMQLSAQKVDFNMNPIEVIFNITTEAKLMHTCRTYSRILPCFDQKMVQCGKPSEKTQLERGKRLHSYLCAPFSLQRQKIFLRRSKCIQDVLAEPQSSVCNRNDTVFADKLQSCREMCTRPDCVSKIELSEVSTCTYINIGKKCTAEAAQFFAQMQQVLTNKEYPMQCQYDLRKKPESELKKGLPIESLVAQTTSSTTYVTVHPPALPSVIDGVVTRTSLPIMRRTDPNSKFKPRPTTSQSNGPVIKTVIVDERGAPMNQPTSTQKPKVVHKFLPNPYTTKNPNTLKNDIIRTTRTIIPVVDKHTYVPWNYKVDAVQVSTLTSALAPVKPTETVISSPPVAFNFKLPAEQTSTQPFRVEINWHDDEVKQEPTKAP…	515				osc	1.71	186.95	5		3.70876	6.24169	0.000270166	0		P			SS	1		4.07767		2	282	218	515	12.4272	42.3301	54.7573		0.0094		-13.475		47.3692	72.5473	59.1575	16.6175	6.53402	56.8583
50	120	WBGene00000013	abf-2			C50F2.10	G5EC68	G5EC68	MFVRSLFLALLLATIVAADIDFSTCARMDVPILKKAAQGLCITSCSMQNCGTGSCKKRSGRPTCVCYRCANGGGDIPLGALIKRG	85				osc	1.32	139.86	4							P			SS			0		0	10	0	85	11.7647	0	11.7647		0.0814		-26.796		52.1469	21.0685	15.2395	79.0494	81.5181	77.6026
3081	3147	WBGene00000401	cdh-9			F59C12.1	Q21035	Q21035	MIPYLGRSLLLLALLAQYSNTCLLKNGMSSVYLSAFEDLKPGNVIGTLPFESQTSKETDVELRVVKGNELVDVKPGSHDLILKKTLDRDEGVGKFEAVVECRSSNLDTDFSQLNISVFVTVKDINDNAPVFDSAEYFVDIKEELPTGTIVFTDFEATDNDQPGPNSFVQYTIVAGPHSHFLEIPDPFKPVITIKDRINYEEIKKFSVEIEARDQGEPSLASTVPLHVTIVDVNDLLPRFKHSHYTAKSQKNGVLVFEPEAISAQDGDRLNASLIFSLSGELSEHFAIDNDGSIRSITPNPPQRATFFVTASEREDTERNSTAILSIRLQSSLAFQHNTYSTTISPTTPIGSTVITVVANSENNTPLTYSLLADTNTVSIDEVSGNVVLRKKLEKPETLN…	623				osc	1.11	141.62	4							P			SS			11.0754		0	0	0	623	0	0	0		0.0638		-12.865		17.0081	54.7949	65.1069	7.39622	4.9128	19.4743
4016	4078	WBGene00000893	cyn-17			ZC250.1	H2L037, A9D417	A9D417	MWLSVQLILLTTAIYTTNAGQASRQAAVNRAIEQTKSRLTPAATPNRVPQRANSSPGKTENLDVDKLNRLIRALDKTWIMPKAGAKEPVGSNFQYKKTCASIYKARHGACQQLGFGVMCFNYCHERGEKLAFKCQDTSDSTYCKQSGTFDTFLAKYRKDGYKAKAYIHQMISRCYATTVCNTQTGILNSTIIDEDPEPVEKTTKANRLKLLTRKPGNSLSLMKLKTRITTTTMAPEEVPEEEVIPEEEEEITTTTRKTRPVKKVVNTFRQKPTPAPEVTTTKANIWDKFTVGNKAKPTPKYIPFWQRLMSTTSKPIEDEATEETELNTDAPEEVEEASTQAEVLEKETEETTPEEPEITTVPEEDVVVTKSKVHKTNTEESTESPKHTFKPIPITVPST…	438				osc	2.6	146.54	4							P			SS	1		14.9554		2	279	276	438	0.684932	63.0137	63.6986		0.7822		-12.103		53.2179	60.8008	43.1516	16.6175	40.7369	53.4463
11150	11200	WBGene00003533	nas-14			F09E8.6	Q19269	Q19269	MRLLYSLFHCSAFLVGFTLSVGVLPIPNEHAASIKAKFDDYAEHYLLPEDFHNAETAPVKKPTDAEIESMQNSLLFEGDIMGVPEIEKSDILKRLRDDPLLDEDEIFRKPFHSALNLVTYPDKLWPEGQVPYMLEEGMTNDQRTAIAQAFDEYKTKTCVRFVPKTDDDFDYIYVKRNVAFGCSSYVGRAGGNQTVSLEVDKCFSKGIIAHELMHALGFFHEHSRTDRDDFVDINEDNIRPGMMRNFEKYPRKIIDSLGMPYDYESVMHYHKLAFSRNGKPTIIPKDNEADVGQRYKLSEMDSKKVNKLYQCGEYSKTSSTTTTTTTTTTTTTTEEPTTTTEVEEKPKDKKVSSTTTTTKKPTTTTTTTPKPVERSRNKKCEDLNAHCGMWEQLGHCQHS…	503				osc	2.84	162.71	4							P			SS			21.2724		2	142	121	503	4.17495	24.0557	28.2306		0.0628		-21.591		56.48	73.0066	65.5736	12.4048	23.4586	86.4603
11151	11201	WBGene00003534	nas-15			T04G9.2	P55115	P55115	MREYVLIFLVAPVFAAILGPYDIPPELPPLNDENFFDRSHSEYETVLTPEDFELGTRITAAMAHDNGDDIWDSDAMYSKDRFEGDIANDNLNASTAELFANGGSGKSEDGKWYNAIKNRLQLWPEGRIPYTISSQYSSYSRSLIAASMQEYASHTCIRWVPKEAADVNYVHIYPDRGCYSMVGKMGGKQSLSLGSGCIQKGIILHELMHAVGFFHEQSRTDRDDHITIMWNNIQAGMQGQFEKYGHGTIQSLGTGYDYGSIMHYGTKAFSRNGQPTMIPKKNGATIGQRNGFSKVDKFKINTLYGCPVEGEKPTTSAPTSGPIVITVKPVVITTGKPPVIQTVSPAVPLKPSECRNLRGDCDDLAKQGWCIRNPGWMRANCPISCGMCIPTKETQKPYV…	571				osc	2.81	146.88	4							P			SS			19.0893		3	178	157	571	3.67776	27.4956	31.1734		0.0934		2.249		72.9845	73.434	64.2127	63.6281	14.3577	53.4463
12181	12211	WBGene00004017	phg-1			F27E5.4	Q09553	Q09553	MRRVILPLVMTVTLCLAQEASEACTKALTDCENDLECQNRLAPLMAACSTNTCQPQCRSAVLNVYQNKLGRILLRSDATCIPGRDELRTCNFLPAESTVHCSLGKLACEGDLQCNSKFGVFMSECEADAARGACTDKCKTLLNQTIETSVGSVFSNCTCTARDDQLCTNLKDNLLGVCLKNTPGVTLSPSDNSITDAPGGNDLADSSVGHGFNILSAISVYLLTVLVF	228				osc	1.99	152.02	4							P			SS			0		1	63	46	228	7.45614	20.1754	27.6316		0.0751		-21.374		40.2899	37.8728	41.6581	81.6532	73.6699	54.0604
12346	12375	WBGene00004150	pqn-67			T16G1.1	Q9XUQ0	Q9XUQ0	MQRIFLCWLAIATVSQTVSAKKFMKIFADAGIGIHCPSGNKVYIHPISGDLQLCTQQLGVYNETSCPGGTACERFPILIPGFQDYCCWSESNPESELSSELEIVKPPMSKRKPGVTVAPIDEEDNEKIFPIDEEEEEDLKIEEKKSVRKLSSDEDEEEEIEWEFETTTVKPRKTKSRKVPIITTTEPPMLITTTIKSAPSRRPQCNDPDKTVLIDYGNRLRDCYFTQCLRGFKCEFNREIRRFICCGNEIDVPPAGLPRIPEPSPVIKSRPFRPNRPFGRLNDGEEDEGNTDGENRGPRNPIVPFNQAGPFQGPIVSPKVESMIENSLGSTSMPNPNRKSKYDEDDDYEDGDGNGCNGNGCSYGRRGGGNQNSGGGCEMNCRRNGGGNNDGCGCNRRGG…	695				osc	2.49	172.52	4							P			SS	1		44.8921		2	519	508	695	1.58273	73.0935	74.6763		0.9986		32.76		97.7843	89.7519	89.4006	99.1624	95.8266	98.2289
2204	2270	WBGene00007868	C32H11.5			C32H11.5	Q9XUH6	Q9XUH6	MLFYLISAIIFTTVAFAAPTPAPTLTVAEEMEAIFQNLTEEAQNDYFQILFDHTLTLAELDQKWDEWAEKHGIADKWAVYTSKWQARKEKFNETTVSVIERLPSTYKMLSEITANRNQTLSQVETALEELKEKFNLEVQLILILSKTLILNEEIVLGGGPIEVGNEVTGNSFRRMRDFKNKNRDVKSLLIPGPL	194				osc	2.72	143.52	4							P			SS			10.8247		1	66	40	194	13.4021	20.6186	34.0206		0.0081		-31.243		25.9519	26.8902	13.0115	41.4616	62.5817	58.9929
2657	2723	WBGene00008146	C47E8.9			C47E8.9	Q7JLG5, K8FDY5	Q7JLG5	MGAVEFVRATTLHLLTTLYLVDCAPILPNVQTGYVPIFGNRVTLEPITFTFTTPPPKTKSQWKSFPTLRPFPSSAEFLNSLPGPEIQNNVPHSNHIKEWKYEVQMPTHARPFAATTPEYSQALIYKAMQNSLKQDVYSTYRTMWKQMMDTWLRLRSHLLSDGVEQDWHMFWRKFTGTVEPYMTTISTQIGKFLNVFLRHQHEKEVEESTSWGG	213				osc	0.64	153.03	4							P			SS	1		10.7981		0	29	0	213	13.615	0	13.615		0.0422		-12.672		45.5097	41.2479	27.2144	62.5522	45.1904	83.7386
6513	6574	WBGene00009573	F40E10.5			F40E10.5	Q20202	Q20202	MQTLILAIFLPCIVLAFPPRHSDPFNPLGPWHKRTKPCGIPKFINELPSEAAEKITKIWEKYVEGNTCEKEHEETRNIIRGLTTEERDKVFAGRCGPSFLKNVSSTVREEFKNVWFDYKLSVVEKELALQKLAYSLLTGESLALFNKWEEELKTRKVEVARRLSELSPDARKAFEEWKELRLNEKKFLAGLSKEIRDELKKMFISSKDKEVEATTTTTTTTTTTTTTTEAPTMPEAVSSTTEQSTTTTAAAIIAEETKEKEFSAFLYSQTPEELNNEDQCSFLA	284				osc	2.96	165.29	4							P			SS	1		14.7887		2	96	86	284	3.52113	30.2817	33.8028		0.0329		-31.2		25.1781	31.7367	37.5289	33.9008	49.8624	49.6684
7261	7322	WBGene00010069	F54F11.1			F54F11.1	O45568	O45568	MSNLLLFLIFFTIFANFEARILHRPRDFRCGRLIVFGDSLSDDGVEAEGESHGFLRNCNGKVWPEYVNAMLECDRYVNYAYSGAKSGPGNFYFDSFSGIQWQINQFLSNNKFLSDDPLVILQTGGTIDFFGGDTNSTEVVENIQQTIQNITQTMSTGTLVILSLLDVSNSPGVQAAEDSDILQERLGHLIAETNRQLHHIVLDSDLGTRRLNPFLRVRLIDINTVALAAMQSLNTTEPFTHHSPDLIPQAIYKYAYHDLWNPSTIVHYHIAKEIVRNLQQF	281				osc	1.73	140.02	4							P			SS			12.4555		0	22	0	281	7.82918	0	7.82918		0.0434		-7.333		26.0747	17.6247	13.0115	70.985	48.703	52.1322
9431	9490	WBGene00010457	K01C8.2			K01C8.2	Q21081	Q21081	MYDKILFILSFYFSFICAQQPRFTCPNNANPLVSNGGTNLFCTSVGSNTDCPASSICVTAANGQGVLICCSQPSGVTPICPNNAVSQPSTIGYVECSQNNPTNCITGYQCVQSSNVASTFLCCSSSISTSSCPSDFTPAVGSNGGTVSCSPSVSTCPSGSSCMQSTLNSAFICCRSSSSQRICSNNQIALITNGALEMCTTPGTQCSSAGYTCQLSVLLATYVCCGQGSTGSTIGCADGRPVYQQIAGQTYTCEITSAITSCPSGYDCAPSDDPFVDVCCLTGSTPIPENLSCPTGWNSYKNEVDNAVRTCTAVLDTSCPIGYSCAPSNQVSQFLCCRLASSLICINGKTLLVNGAPKLCTPTTYSQCPYNYSCQQSVNPTVTVCCSNT	389				osc	1.54	150.49	4							P			SS			15.6812		0	3	0	389	0.771208	0	0.771208		0.8638		-3.826		65.0233	36.6863	61.9234	79.9165	77.7499	33.4046
12506	12535	WBGene00010968	R01E6.2			R01E6.2	Q21619	Q21619	MIRILASLALLFPFVLPFNYNNGASAACIVTKNLLFSHGNLIRQLKKDEVDSFKKYKKELHVFNTKINEAFDKAEENEAKNSTVPPMPIRPTLPSFCTGADTTMYIFGACTVQNNKVYIGTVLARELEEKEKGKLADFAKKLAAVTPGTTPPTDIYKGLEFCTEL	165				osc	2.78	157.88	4							P			SS			0		0	27	0	165	16.3636	0	16.3636		0.0049		-23.108		40.9433	37.8728	11.6581	57.7598	66.5979	78.3616
12748	12776	WBGene00011175	R09E10.5			R09E10.5	Q21874	Q21874	MRRGCRHHLAAVVLLIATFPPLAYNQNIGGINQNIGGTPQNPTINQVSPGQIFSGTGNNPFYGVNLVPFGPEAGDLMVNPSMLTSGMTIDLYMFFPYYGGLYNYTTISVNGYLGFATVLDQGPTINVGPETTDWPRQEDPAMIAPYLCKQQVPQQGNPARRAGVYYRLLLRQSLFGRESNSNLNLGGTLQQNAFFGQQASQACPGTADSYVRCDSNSDYFLDQMMIWVQEGVAGGAMFRADAAVVVTWYNTASAISGRSDIDAGQTGTYQVIWLTDSTARLSYVIINYDRLGFDAQDFRGNSRSGRCRAVFNGGNHTGTVEVDPTQPYKNTPKVLAQRSGVPHMVRGRYMFRVDDVVRPAGCSNKTGGTYPIMIYPNIVNMLGDMTVDVNACCLDRTQT…	1437				osc	2.38	144.18	4							P			SS			2.36604		1	127	89	1437	2.6444	6.19346	8.83786		0.4569		9.585		28.7423	87.3004	15.2395	64.758	11.0857	7.13584
959	1026	WBGene00011590	bus-19			T07F10.4	Q22316	Q22316	MTRLFILPAIFGISSLSLWYMICSAPGWPESEGGVFEIPKQFDNFTVLADKFRAYKEDHFGYITTLFICAYLYKQTFAIPGSFLLNVIAGVVYDLWSGFILCCCLTTLGSTLCYMFSELFGREYVFYYFGQKLTYLQQKIDDNSNRLLPFLLFARMFPISPSWLLNIVAPFLNIPLPIFVVSALFGLAPYNFICVQAGYILRDLRSWDDVFSTTTMLKLFSFALIPLAYAIYIRPRANKHQLVSSSDEMDEKVKKMEIV	259				osc	1.27	177.41	4							P			SS			5.01931		0	38	0	259	14.6718	0	14.6718		0.0807		-21.575		13.2081	9.11078	3.8762	30.8057	32.8764	62.0437
18302	18309	WBGene00012755	Y41C4A.8			Y41C4A.8	Q9XWU5	Q9XWU5	MRLLIILSILPHITFGYMGAVMGKLTTCDDGITNLIKDWDSKDFSAFTCLNSIHYAVQKDIDSEFFDMVQQNSSYDPKKDQVMHRCMDETIDYEDRIPIRGDHRPNWARFGEYLYVPVQRWLHNLEHGSIVLLYHPCVDLDELNKLRQLVTSCIYRHVITPYIKLTAERPLALVGWGSRLEMNSVDEKKVVEFMKKYGNRAPEEITRDGLYDEYLLKEAKPVSENDKTICPNY	233				osc	0.78	147.95	4							P			SS			0		0	11	0	233	4.72103	0	4.72103		0.0065		-25.472		29.3491	34.2913	16.0919	69.6536	37.6345	70.9064
18390	18397	WBGene00012814	Y43F8B.3			Y43F8B.3	A5HW96, H2KMJ9, C0Z3L5, H2KMJ7, C0Z3L4, Q9XWX5, H2KMJ6, K8FDZ2	C0Z3L5	MPPLRWLFLVLCAVVAVRAADDSLIGSFKTMFFGNEPEKTNDSATSSQNNPPISYHQYATASSPSSRSQPPSGQSCTLPRQIGTGPYRIPRWYYNPVRGRCELFYWSGCCGNGNNFQTFQTCQSTCEVDPCSQDKEPGVGAVQLPRFFFNKDSRICEQFQYFGTGGNRNNFQTLEECQAQCPESPNPCAVTGGATLSPCAPGQGCGTGSYCHVGAQTQTTVCCPKPAAVDRCQQPLNVGIGNSNLQRWYFNPLTQQCSTCTYRGLQGNENNFLSQNECEQSCLVNPCKIGSPYRSQGITVQCSAMSPTVCPAGHYCHLGADATTSVCCQALGNSPCEEEMTQGEGPSALTRFYYDASQRKCLAFNYLGLKGNRNNFQSKEHCESTCPVWTNPCAIGQPI…	1178				osc	0.66	156.83	4							P			SS			2.71647		0	3	0	1658	0.180941	0	0.180941		0.9712		4.001		97.0376	86.3277	75.0233	99.4252	99.3441	75.2665
18441	18448	WBGene00012863	Y45F3A.8			Y45F3A.8	Q9XWZ0	Q9XWZ0	MFLFFLIFLFSFVTANENYNDKNVTELCSNGVKPGNSCHLVPSSGYECANSNSSTSWCESFDGKYKCCEKSITKCKDRSSFCRLTKHLCTSKSDFKTMKSKCEATCGFCGLRTFEEAEKTRQRMDELARGQECDLPRKCVFPKEKMLNSTSTAGNSTATPLKFQSINTNSSFTGNATAASNQNSTESTNPSTIIDLKAILQSTGRTSPQTTTSRPRSRSPRSSESRHNETTSITLPSSFNSTVRKLTLKELMTTRDTMPKITTAEPSSLTTSLSKTVIQGTCFDEYTYCREFTSLCSHPAFSEVMASHCSLTCGRCDEVERVEEGTEDCEDMTPDCRNYRDLCEHSRYKTLMENYCPKACGHCIPMCRDRHQNCPQFHEDGFCNDTMYTFDERKYLCGA…	404				osc	2.71	150.19	4							P			SS			11.8812		2	225	203	404	5.44554	50.2475	55.6931		0.3838		-2.554		59.914	65.3844	72.5866	41.4616	44.1538	65.9175
18620	18627	WBGene00013027	Y49A3A.4			Y49A3A.4	Q9XW91	Q9XW91	MLQLFLSISLVFIHTVLSEKCADAHHDCRLIAVKCLSPNRIEQKLMEIACPLTCGYCINSKTGGTTTSTVPTDEIIKPFKCIDEADDCADRANFCQRKFYKRMMSLQCAKTCKFCVDDDEYEEEETEDSREIHISHLKSKMGEKTVQKLEELKIVDNVIDLLRNATTPTTFMEKKPRRFSKRIENISSEMTDTAECVDRASDCERNQKLCTHRAYSPLFRKICAKTCEYCTSADDIESSGEFL	243				osc	0.85	140.92	4							P			SS			10.6996		0	56	0	243	23.0453	0	23.0453		0.0661		-35.342		31.3952	23.1565	26.2442	39.7568	40.7369	68.4107
19685	19692	WBGene00013865	ZC334.7			ZC334.7	Q7YTG3	Q7YTG3	MHYIHTFLATFLLPILADTLLTADLTTGHQASAAAVFQSEPSSDYFSTSDFSTTSPRQYPTDEADEELYALQKAAKPQFYPRPQNNYGGYGGYRPNPPQPFGYSYVGYINRQARRYPVMMYTLIQCVPCQRAKHLLATTYGDIPSHFLELVGDEDWQRQLQVDLLKVTRQATFPYVFVCGNFIGGSSDLFNMHHSGQLRQALNNCMSRNG	210				osc	1.85	179.96	4							P			SS			22.381		1	86	81	210	2.38095	38.5714	40.9524		0.0228		6.143		55.6104	49.9312	17.9317	86.2343	83.6527	83.7386
19967	19974	WBGene00013965	ZK287.4			ZK287.4	Q23456, G3MU07, G3MU06	Q23456	MSILYLNCLKLLCVLQIVHLITADKIVKSPQTVRSVNYEDFSLLCADGIPLLMEDHKPRPCQPRPWLKEQKCPTGFWCHEGQSEHSFYCCPSSRKFANRCHLPPAVGYGKQRMRRFYFDWKTDACHELQYSGIGGNENIFMDYEQCERVCRGAGEPPILLPSNMKVLPKETTKDFKKMEKPEMEKKMVYPKEVAAPVSLQPPSLRTTKPADVHESFYTVSPQTSSVPHPTTLSTTHSKQKPTTTEAEIPEVFDPNPCSLSPDKGFPGSVTVNMWYYDPTSTTCSPFMYLGKGGNSNRFETSEECLETCGIGKPTRKSCELPPAIGNGPFNIPRYYFDRVTKKCERFFYSGRDGNDNRFYKKNKCERLCLRKKPKKKENIYEFTTTPSTPSVIYESTPLR…	1285				osc	2.54	137.58	4							P			SS			16.0311		2	273	183	1285	7.00389	14.2412	21.2451		0.9863		5.153		97.8138	95.4483	93.2081	98.8013	7.28568	99.3122
620	687	WBGene00015103	B0280.7			B0280.7	P41998	P41998	MKNLGAAILAVICLQYADSAAVFDRNFTKPYVLKKTWVQNFIKFQYIFEGNQGKAKIVPLGCAPTNVDGDNYLKPGERTFQHDFVFSCEEGEDGVLNYEAIACIDTQGEIMHPGETRSLSNGTVILHCNLYGGALKKVVERAAGCYFNETIYPEEEKWVEPQVNPNDTSIDGRLMQCFRPHYSYYESHVVGCVIGKLGVLIDEFGQLLDGSYVKCVESEFGHVSLKSANVDELACTMDNKTYAHASQWTDVKKGANMRCNYRHIVKESCVLGTEILPIGQEVPVSRDCIFLCHPQTNVYICDNSLEEFKIVESNGDDLGPVEENKIVEKLPENKKKSLKSVFKF	344				osc	2.67	152.62	4							P			SS	1		0		0	18	0	344	5.23256	0	5.23256		0.1344		-21.968		33.4218	39.0248	16.9934	42.3409	29.3712	45.4729
1284	1351	WBGene00015546	C06G1.2			C06G1.2	Q17742	Q17742	MNFALNSALFFVLLASASCQFMQYDDVLGAVVEGSGVEIEKASTTEATTTTVVETTTTVDSTTTEVETTPTTEATTTVAETTTEAETTTTTVESTTTTTEATTTEAATTTTTTTEEPATTTKEITTTEIVIAETTPTEEVDEESFLGFKKPDLATIYRRLFPFQHHPGQKHYQGQFGQQGGF	182				osc	2.88	164.09	4							P			SS	1		59.8901		1	129	110	182	10.4396	60.4396	70.8791		0.9682		-28.364		28.3075	46.9909	27.2144	23.4463	34.8219	54.0604
2102	2168	WBGene00016242	C30A5.10			C30A5.10	P34352	P34352	MIRLVFLFLLVVLSVELLDFRSNNYRQIINNALPTIDPQMISQAQAAINPYTDIFVNPPNSFVDFPMANIASSGAFWQQPQSTVSQVAWNPPVSTNPSSSPAASTISFQSYQNPSTFPSTTTASTTTSTTTMPPTYQTTTKSVKKNTETLWTTSKSPMKLSKNPKPSKLNQKSSKSSATSFDSAQLSVLSHRLLNDVLIIPSSRRLYILAIIPIHQSSGQQNFECGEIDVNAIVRMAAFLEAQKTINESNLLKEIGVDIGAIIVDSCSTDLRSVADLYELLSGTNIQKSDLIAIIRDDSTFMPNTEQIIRQLNLPVVNTFFTTRSAVQTSGTLPSMFLPIQSIISALRHYQSTCVNIIFDEKYSESVSEFQQVALTEGICVEVAIHVKNASSTVSEMVV…	988				osc	2.24	151.06	4							P			SS			10.2227		1	187	187	466	0	40.1288	40.1288		0.9454		5.779		2.08794	13.5593	55.974	3.66986	2.7045	3.21297
2628	2694	WBGene00016731	C46H11.7			C46H11.7	Q9GYJ4	Q9GYJ4	MFRQFIISFAIFSVAFACEASESEGPCDGGILVCQTQVCDVAAGQCCPVTTVPLVTSTTAAVVTDSDGSTVTTTASAVTVTSTSTTSCADRLNPSTGVSDCPALAYLCNDTTYYTVMTQQCPRTCGRCNSTTTSSTSCADLVNPSTGVSDCTARASLCNDSVYYAVMTQQCPRTCGRCNSSSTVTSSSSTTASTTCVDQVNAATGVSDCPNRRAFCTNSAYATLMRAQCPLTCGFCTSG	239				osc	2.47	175.59	4							P			SS			32.2176		1	140	87	239	22.1757	36.4017	58.5774		0.4353		-11.413		37.5166	52.8519	30.2456	38.8406	80.3144	31.3731
12164	12194	WBGene00016732	phat-1			C46H11.8	Q9GYJ3	Q9GYJ3	MFRQFIISFAIFSVAFACEASESEGPCDGGILVCQTQVCDVAAGQCCPITTAAAVTSTTAAVVTDSDGSTVTTTASSVTVTSTSTTTCADRVNPSTGVSDCSALAYLCNDSTYYTVMTQQCPRTCGRCNSTSTSSTSCVDRVNPSTGVSDCPARAALCNDSNYYTLMTTQCPRTCGRCSTSSSTTSSSTTCADRVNPTTGVSDCPARASLCNNSVYYDIMTTQCPRTCGRCTSSSTISATSSASTTVSSTCVDQVNAATGTSDCPNRRAFCTNSAYISLMRTQCPLTCGFCTAG	294				osc	1.99	171.42	4		1.98838	2.49795	0.0218468	0.000192081		P			SS			30.6122		2	121	69	294	17.6871	23.4694	41.1565		0.7026		-12.77		53.4537	64.7187	48.6883	51.663	90.6411	27.9833
7088	7149	WBGene00018713	F52G3.5			F52G3.5	Q9GZH9	Q9GZH9	MRIWYVLSILIVSATARFFDVCPGRRQSIGACLVGLCPAGSECINSYCCKNRKSGSLSPLEQVEVEAEETTDYPACLNGGKSIGECIANSCPLGYQCSAGLCCDSETLGFKKWSLKSRKEEEIPMKSSPISLITVAPDENSENEARKKMKGSEEDSEERNSTFAPDKEIVDEEDSELEEEEEQTTSSTTTTTTTTTTTEEPSTTSEYRKKSKKNRSKRPKTTKTTTTSTTTTEAPTTTTEEYTTTTEEDVTDLETQAPNVEEVTEPHFVCPVGAPIGECIANKCPEGHGCVEGQCCILTPQINCTDVLTGCLTHLCDRKGYRQFMTNNCAKTCARCHLVNITPSEIHDCRDRRSDCEEWAAEGFCESSLYTTRQKLKFCGKSCKLC	386				osc	2.22	153.14	4							P			SS			21.5026		3	255	252	386	0.777202	65.285	66.0622		0.1725		-30.939		61.2872	41.2479	75.0233	37.1064	27.0376	46.0255
12848	12876	WBGene00020014	R11G11.6			R11G11.6	O16949	O16949	MASYFILAVLIAVTAAASYNKPNFVKDLPDNMQKSYATIVRNSQLTKLQKDEQLQQWAQTNNLSDQYTAYTKKQQDNENFMSKNTTQIISQLSSVQAQLEAILSNKNLTRDQEEEAIDSLEEQYWQEVPVLLFIRKMWKKAMGMKV	146				osc	2.77	149.19	4							P			SS			8.21918		0	19	0	146	13.0137	0	13.0137		0.0045		-3.647		48.1749	60.0197	23.4439	44.1562	88.843	59.7765
3438	3500	WBGene00020327	clec-21			T07H3.4	O76608	O76608	MQHSLILLLVFIFLASASKDPICTHGYKLVKNRCLKLFSEPSNYENAQRQCYQHGGPLVTIRSKEENLDVLALAGKGHNLWIGLYCFTVLDQNGSLSNCIWDDSLGTAEQYHAFESFAGSGSRETPCVTVNTTTGYWISTKYENGMYPFVCEMPTTIEDDCQNNYNGYCYIPHSEAKSFENAQKSCEEECGNLVSIHSANENLYLNILAYNFLPGEYIYIGGMVQDFGFSRWTDGSRWSYEKFDRILKRKNGECVVVAGDWEDVIPIDQWVTTPCNRIRQYFCKRPAGEKCLGGRPKEIGPLVSYTCNSTLLQTPGIIVSPQSQERQYCEYQMHTPGFYSILLTFTTFDLDPKSDELKVYDGDSEQNRLIGTFKGNNEISVTSSGSAMFVTYRSNGTGS…	421				osc	1.7	179.55	4							P			SS			0		0	7	0	421	1.66271	0	1.66271		0.0132		-6.349		49.5898	24.4461	26.2442	72.2132	66.5979	41.7416
16353	16371	WBGene00020863	T27E4.5			T27E4.5	Q23053	Q23053	MQCSTLLPLLLLIFSNWKGEASSSPRTLKLCLYLKAIRRSTAECDQVTLDNLTSVEENQPNSTMSPLAKIIANIEKRNEKVKMTKKFKKFGVPLPMCSSNLESGYKQCRMDITCSSGYSCENNSKTRCCMEANHSPEIERKTEEFKTCPSQLQMAYFCQKTSTARKTVKPCKTDQDCMFSNVQKCCDAGCGFNVCVVASGNYTQNTLIFLGSK	213				osc	1.71	157.29	4							P			SS			7.98122		1	42	38	213	1.87793	17.8404	19.7183		0.0211		-19.582		63.66	43.4169	48.0496	65.9224	82.6333	65.9175
19108	19115	WBGene00022018	Y61A9LA.7			Y61A9LA.7	A0A0K3AW52, A0A0K3ASI8	A0A0K3ASI8	MLFLLISCALYLSHVSGAPCKMSPLTTFLTDAQQQTLHQLIVSARDSGANEEMVKESMDEYLAQILSPDRLQELKTAHDEFEAQRRGKRAAISASDKPEPKKVFDIIDQFTSDYQKFYEESSAVRNRNNIN	131				osc	1.8	148.2	4							P			SS	1		0		0	40	0	131	30.5344	0	30.5344		0.025		-23.354		41.4861	44.6156	16.9934	61.3854	76.4849	68.4107
10183	10241	WBGene00022283	lgc-27			Y74E4A.1	H2KZY7, Q8TA50	H2KZY7	MVEARWISLLLSLVTLSVAAYDIDCKWKSNITDIEDVAHHKYQVLEECLFYKLTSDADRMQDKSNALMMLPPTVAAGETLEVQVLDGSITEMWMNEVFKEMNINGFLKLSWKDRRLRWNPEEWKTEVLRLKSMGRLWSPDINSDKLQTGSQSTDFVNYHDIQSNYNGNVTARLEFRMKAQCQIDYTEYPNDRKHCCFNLQSNLYKRYVRFIMEHEGAHEMLNTKNTKTNWHIDPMYTWISKMNQENDNRAERLEVCVGVVRKSSTLAVELTLPVLISALILLLAPFFGKFNQQIYVKMFALLLQFLSFQFLAEKTPQLGFGDNIPKIYVFYAFTIGMTVLSLIATVMISAMSRVKRKVPPAHRYTLLASLLNANLCCGSEEEPTTDGTSSKDATSDWLQ…	425				osc	1.87	146.63	4							P			SS			17.757		1	60	35	425	5.88235	8.23529	14.1176		0.0722		-10.801		12.4171	28.0619	5.25424	24.6401	33.8467	36.0206
20017	20024	WBGene00022747	ZK470.6			ZK470.6	Q23509	Q23509	MNFRFILLFLIFPFVFASLEEFEQDSAEIKKEVPARFRSFKNFGSHQDASNQAAEVAGSNEDNTDDPEVAPDAPYLMADSSLEQEEECVALPNRTRVRPSFFQCKEDTKFELHGGAITNGNGDDTYPVSFNSPIRIFLDITSNSNKRYDNLGVEVSIFKRSTGWFGCGWMFLPSFGLLSNYDMCDDNPSCPVTPGRQVIEFEIDPTKLFTNLFRMIHYDLSAYQMMVRVRDNRDPYRELLCATIQTRITL	250				osc	2.55	172.52	4							P			SS	1		5.6		0	45	0	250	18	0	18		0.2791		-19.572		61.4763	61.5279	13.7141	83.3579	48.703	88.9364
4546	4608	WBGene00001059	dpf-6			F44B9.1	P34422	P34422	MLFLPILILNLLIITHAIDIIPREVLFQDPKYSSVSLSPDAKQVGYVAPDENGIRNVFTRCSSCSYSRQVTFETEHPILNYVWTAIPDVILFTQDNHGDENTRIYKKNISATAIAADKTQRVVISEKPMVKAMILSNNLISETVLIGMNDENPALHNIYAFNCQTDELKLVLQNRRFSIFFFDNDLNVRLASEEGPDGEMIYYRPRSNEGARTTEQNTWVEYLRIQHDDKAITMPITFDKSNNFMYWIMGDGSDLGNLVVFPFEDPQQKEILYTAQRAQIGNVLIHPTDKTLLAVTEVYHKPELFVANETFMEDLQYLVNMKPSGSMNIVSMSIDMSTWLVTYSSSDEPYDIYLYRRWNKKAELFMSTRPELKKYTLNKQIGFDFRARDEMTIQAYLSL…	740				osc	2.18	104.34	3							P			SS			2.73973		0	52	0	740	7.02703	0	7.02703		0.8098		0.394		24.1169	71.1938	5.52198	22.1518	34.8219	14.1145
1189	1256	WBGene00007325	C05C9.1			C05C9.1	Q17654	Q17654	MLLKLAGLLLIVQISESLLLRVNEFGLHEAANFTRQWLSMAGPHMKMPEIRQSFYNSFAGGEMTVTNITIKRFVPPLIRFRPSDHSFLYMSTLSGYAQVSAEWAVESQFLHMLKIPLEGQIHAQMTGLISEIAMQITQDNEVEVHHCVAQIRDLRVAFEGSVAADVIHWFRQSITRAIRRTLEEEYCDMMRNHWLPWVEAQLYQFPTNLTISHNPDVTLIQTMQSIAMTQHHVDVRMRSDLIWDDEFVESGMVENSTLASVEALPRSTRMIDMFIDEHTVQSIIAAAHFAGHLKTKIESPFLKTSCDVLCIGTVLPELAEQVPNRTLSVEAATLSPPVIDLQQGRALVYLNASLNVFAAPPLKTVEGSMLTINVETEFTLTMEMRNKRVKGYINMINAQ…	478				osc	2.72	128.38	3							P			SS			0		0	10	0	478	2.09205	0	2.09205		0.0031		-13.868		14.0162	42.3041	11.6581	26.4309	14.844	19.774
10348	10406	WBGene00008093	lron-1			C44H4.1	Q93377	Q93377	MRLLLFNLLIAGWVYSQCPTLQLQEPCTCTSTRYEAVSINCDGGSSLDAVLESLSNSPQAIDSLTISNTPIEKMPGYAFQGFQIKKLFLRNNGLRSFHPNTFTGNLENSLEELEIRGNYIDGIPQSGVSILKQLKILSLPDNLIEYVQDNAFLSYHSRDSLLKLDLSANNLTAIHPTGLLGLENLSQLSLDKNLLSEIPSQALENIPSLEDLSLGVNRIHTISRNSLPLPNLKSLSLEVNQIRLIPSDSFSETPLLSYLYLGNNLLTSIDASMFLHIGGLKVLSMSNNKDITSIQANGKLSVQQFKLCICILAFQHAPSLIRLELFDCSISRIEPKSLQKVQHIQVILLSRNQITRISHDTFSNLPELSELDLSGNSINAVDDFAFSQLPMLTSLDLSS…	607				osc	2.38	130.56	3							P			SS			9.39044		1	115	95	607	3.29489	15.6507	18.9456		0.2686		-4.754		64.0236	68.6711	79.9558	86.2343	46.2786	32.9108
4159	4221	WBGene00008376	D1054.9			D1054.9	H9G2X5, Q18951, Q9XVV1, H9G2X4, Q564Z7, Q564Z6, H9G2X7, Q8I4L9, H9G2X6	Q9XVV1	MIRSLLAITLVLGFTASQQYVQQQRTGAVQQQPVQSVQAAQPDAIDQIPAWYQMAKPVASRAQQLPQASPSYYERIEPTYEQRRGEQPTYERPGIQTNQYANYPSYQNRQPYENLNALTSGASLSNLQASRRYPSGASGAAGGSDVPYDSALKRYHKLLLKRRQWTTKIGRILASTTPMTPSTVVPTTTTTTTQAPTTTTKKMPKSLKSIYSTIVAKTTTTTEEPTKAPATTTQATSRVTGRLVGKPRGTFKPHGTRKGWRMWKKVTPKYAGKSSVTTTEVPVTSTTIPTEPSTSVSSSSTSASTTPELPIIEETEEREVTEASTSTTTTTAEPSTTATTTTTTTTEEPTTTTKGSEEQLGGKGPSPLRYICRHKAGSNEHDPFSERRASTIGPFRPIT…	560				osc	2.84	134.16	3							P			SS	1		40.1786		1	157	144	234	5.55556	61.5385	67.094		0.8971		7.991		84.4363	88.7865	83.7337	16.2122	28.5876	30.8622
5393	5455	WBGene00008779	F14B4.1			F14B4.1	G5EFK8	G5EFK8	MKLLLLLLFSFPVFIYSEVNHATPLILPHRNEDPVFVLLSSTPSTLPTTSAPPPPSIPILKPDASPCDLIEEAAALHCIGPLVDYAADLTNNVLHPPLSDVVETCAKYNQYMMCTQGVRPDCRQSRAPNIEFMYETICEPKFAAIMKEEQACLLEVENDKNVKECFVNKTNTLRDETPDTVSNPTQNYECTVIQAYVDCLIEREETSCRDAEKIEISFLSMLAKRNSESRCELNTNAIKSRPKAQPLEECDTQGNCKCRLPGYYYEAARKKCLDVDECESLSSACSQKCVNLPGTFECTCDPRTYKLATDNKTCERIDQSPMWLFFAHGQSVWNISTDGKSFQLQRAGLQKTAMIDIDVKENRLYYADIGANVIERMNIEGTFPQAVQRFDVDGLEGIA…	722				osc	0.83	131.44	3							P			SS			4.01662		0	8	0	722	1.10803	0	1.10803		0.2209		-19.211		15.269	64.0776	51.1349	21.4665	9.19921	15.861
13358	13385	WBGene00009891	scl-10			F49E11.5	Q20609	Q20609	MNCYFRLICLLIFSFCETLCEFSETGKNYILSRHNYLRSQIALGKYVAGNSTKPSASNMMKLIWDTTLETTAQDYSTGCPTGHSASRANIGENMYWWTSPVVTQTDAELLGNRSANLWESEFQRFGWNGNLLTEELFNSGIGHATQMAWATTNKIGCGISKCSSDSFGTQYVVVCLYSPAGNYIGMDIYKSGETCSNCPDGTNCESSTGLCV	212				osc	2.1	99.37	3							P			SS			0		0	12	0	212	5.66038	0	5.66038		0.2941		-13.384		38.988	25.6988	16.9934	75.8217	86.5831	55.4041
15436	15456	WBGene00011393	T03D8.6			T03D8.6	B5BM47, Q9XTY7	B5BM47	MATLLTLLLLFATPIAIRAEEFVWPEPSNAIERKFEKAALTSDNAACSKIGGEILRKGGNSIDASIASMFCLGVVNPQSSGIGGGFLMTYFDQKSGDCYSIDARETAPAAASRDMFLNDSDGSKYGFKAAGTPGEIAGYWHIFKKFGSGKVTWKELVQPSVKLAREGHPVSPYLATVMKVKERHFRLFPSVKHWINPETNDTYQSGDLLKRPKLAKTLERLGNSPNPVQLFYHGEMAKTLAKEFQEGGGLITEQDLANYKVREYVNSNSNDHFRGTLTMCGGPPPSSFGVTQLIVSAMSKLFPEGHKDDIYNDPKVLHKYIEAMKFAYAQRTLLGDHDFVKGALELSKNLTTPEYTQWVIDRMTDKAQSSKNYGGIAQYVPPDHGTSHVSAMDQYGNGV…	578				osc	1.58	122.2	3							P			SS			3.2872		0	15	0	578	2.59516	0	2.59516		0.408		-9.764		55.8143	62.8224	45.3476	45.1511	80.3144	28.8873
18784	18791	WBGene00013166	Y53F4B.20			Y53F4B.20	Q9NAA0	Q9NAA0	MIPWLLLYLFGIVTSDLHQLLSTRPLYSDDRLPPILKPLSYDLQLQLPLSEVSDPDVPLFTGRCVMHFEINQQIGPESAFISDSTSNRARIKFDIIMLDHFENVSLVMNGHELEIFNVQLTDDSMELSVDQPVLFPGRYTLTIHRYKGLIGSAIYYRDAGEHAVFGSNLFPNRAPAVFPSYLASTEKVTFSITMVHPVGTLALTSGSNEGAPRKIDENWQMTTFSTTPSITPSMLCFLLLPHEYTHIESTYTGVNISVHYNRFRVQKEQTKHLLHTATQVLALLKDIFSSLIPVPKIDIITMNEVSSTACFGSIVVSEVQFFSADYANQVKMLATWLAKQWIGGYAAISEGSELCLQEDLVAFIADKVIKRMTNDEFTRLGHLAKIYLSETIFTAGDTL…	694				osc	1.09	111.2	3							P			SS			1.72911		0	22	0	694	3.17003	0	3.17003		0.0296		-14.552		9.9042	22.0437	22.4662	16.2122	6.25154	20.3341
19119	19126	WBGene00013387	Y62F5A.9			Y62F5A.9	Q8T3A5	Q8T3A5	MTILIVALFASIVVLCHGGTVETSHPASDKIIGKYIELSMNLTILLADTAIDEAKIHQLSKDMVSNDYDEDKVQRVLDKFMESLPADQKKDFGRLYFDKVKLDYITSKVHRVLGFYLTRHQIQRLRDVLDKKFVEGASRSQLVEAMVEELTKDVKREKAVKAIEQTMKDLKIFNRKNPGWVDKVEALFSHVLVHDEM	197				osc	1.34	118.96	3							P			SS	1		0		0	24	0	197	12.1827	0	12.1827		0.0104		-35.402		23.2916	41.2479	14.4461	44.1562	33.8467	56.1066
19758	19765	WBGene00013846	ZC84.1			ZC84.1	Q03610	Q03610	MMFHSLGLLYLFLYVTLAEDCIDRPCVECRHYIKQDDPCLHHGTKPMLFCDPQTNLIQESSTNFLECVQNRWVLRECVTGTIYESGRGCVDPTIQPFMQGFSVSGSGRVGDVCQYNTDCLSGMYCATGLCSCLSTYILRESYCYEKVNPNQPGCTYDVQCEAVWPGSKCRMDSSIGTCRCPEETHVARETRDGWVCISLRDLSSGGTAPLYFVCALPEGAGFKISLNDPSPSMGAFPVGCTVGSSATIEPVQGLHGGGACMWPSDGEYIGDVYDCIHTSPHINLAEKFPQSNYAPTADGVCCPSRALACIQPQLTGPNPSEPRWWYNSVTGTCQQFMWDSGATEAKYHSPNNFKTIQHCESYCRDTCQRGSPQYSTESAVHSERPITSCAASVSCANDF…	1561				osc	2.93	133.25	3							P			SS			2.24215		0	32	0	1561	2.04997	0	2.04997		0.9775		5.056		97.013	83.3063	89.4006	99.0813	98.9585	10.7566
1214	1281	WBGene00015496	C05E11.7			C05E11.7	Q17665	Q17665	MRLILILLFMSESSKVFARCPDHSFLGCMLRLKAQRVPIEKNILSLIFNIGTEARLLHTCKVYSSTLPCFQEKIRECGDDKQKRILNEVSKTIMYLCSPFSLKRQNLVIEHQKCISGVLSLPASTGCQLDDNEYGKQVISCKKECNSRGLICMMRTWISEQNTCTMKDIDQKCGAEAASLFQELQTTVFEPTYPVVCTPSNETIATVRPKISNLKEKKIKTQYRKPIQKSKTEIQEHPMVLTSPATPSTADNIYIALPEQTNVYLRPQRPTFAANLTNNNAAQLYPNQVELQEKSNIWNKGDYGQKVQYNKEHWRQKTSSGEFVFTTQHPLFTTTEYGATPRRHKVIDILKSLIPPNLPSQLTALLENSYDKEIFAETQSYNTPAVATPMSNIYATSQA…	463				osc	1.96	109.38	3							P			SS	1		4.9676		2	317	287	463	6.47948	61.987	68.4665		0.2543		-3.949		30.8696	43.4169	46.0599	20.2776	17.298	38.2633
1401	1468	WBGene00015622	C09B8.3			C09B8.3	Q17845	Q17845	MLSLLSLIIASGTVLRADTELWEPLTYPDPRTNSTECNVPHDGTLCDPDHILTDTWRQTILDNIEKQMAKLETAKIHYTDKANPECFLNSTGPPQIFLILAKRIHAASNQSYVRSDLTKFGDGIREAFGLNEMPCQNHVLISGVELAKEVYVWTGADLPIPKETLDNLQYKNLFNERNYMEELNRIVDEVSSLIMDPFKEHSTTLAPEETTEDGSGTTLDSSSPSNLTETVIPTWMYVVIVICVVVTVFVLVFFVFFIIKYIKNHSKSAQIYPIESNQKSGGPIFNVIQKHENNGDENYQLERGICMNRRPSIDSENSHQPMSEHSECTADASSIASGENETKRHGFENYSKEQSTNNTAKVTIDDGQLSTDRVIARRNSDMRLAPPNIDDQFSSL	396				osc	1.6	113.32	3							P			SS			5.55556		2	207	193	396	3.53535	48.7374	52.2727		0.4246		-7.843		24.6844	46.9909	39.9975	27.0572	20.8401	35.4827
1854	1921	WBGene00016022	C23H3.9			C23H3.9	Q6A5A0, A0A0K3ATW3, H2KYX5, A0A2C9C306, H2KYX6	H2KYX6	MKLFFIATVLLISGTHGATTEQLRQWILNNRESLNGQNDLAGSILRLFGWGSDKTTEATTTETTPEAPTTSEPRSHSRDVCPFFAEPLILANDFAFCRPASLGDCPVGYLCDQSVKLGRSICCKDTRRGIVPNGRPARPTQRLPLTWSTVTPTAAPSQPIPTATSRKAPWYIKDRTAWPTYNRISAEKALQKTSTTQETTTSTTAQPTTTTTATTTTTTTPLPTTTTTQPTTTTTEPTTTTTTTEPTTTTPKVNSWAKLWTSTAEPKSYVNVTVLQAGSVRPLRDGQVEAVGAITLVNDNGYIVLIDTGASSDTERLLHMKAFACVKNTLQSFIFQAFM	339				osc	2.45	118.45	3							P			SS			22.1239		2	142	104	339	11.2094	30.6785	41.8879		0.2709		-18.823		23.2916	60.0197	24.4436	20.2776	12.0216	76.8558
2125	2191	WBGene00016273	C30G12.1			C30G12.1	Q09255	Q09255	MVKSLHYFILPLIGNALILNTPPEYQPGYGYVGPACAVFDSTLFLHGVSKRKLNDHELHIFSSYQHDLSAFKDSSSSFDSFEASFPTIPKFCGGYDDSIEVVLDSCIVRNNHVYVGDHLIRPLTNFEKQKIQLVKMRRMYGESKRKRSKRSSKPLPGTRPQRDFSEMLHKLLNINSTVTSRFLPVVSQSPLFAMEGPWQNLFELGKDKDMIELLAASQFKPQLPPVASVPVAPVIDITKIDSPYRATFTTMKPRKSQKPEKKKEVFNVFTTKTNPQITTTTMTTTTRTSTAIPTTTTTPRQISLQTIPFSTTTRQPNFDKTKTPATMPSASSSSLSSIQTVVDPIILKLISKALEKNEMIDEYSLKQALSMRNVATTTTPLPLRFILPTPAAPNPFLPS…	453				osc	1.84	125.16	3							P			SS	1		20.5882		1	212	153	442	13.3484	34.6154	47.9638		0.4743		-10.745		69.209	75.3893	69.7396	48.3026	11.3707	85.1437
5336	5398	WBGene00017416	F13B6.1			F13B6.1	O44481	O44481	MLSFIVFALAFAASSALTIVPLSSADANGAAYRVNTTSRIYIVSNSPQDVLQRITIKTDLGSNANAYTLSVPQADGSLTPLIPSQNSDLLSVEVTGTNDATGWLYIDSITPNLNVFPILENSSISFKQGTNVFFKMSSPAGKIPVAQNVVIGKNQVLNGFVGLPDSKDMVQFFDSDSIEGLTNYDQLELPMDMFHFTSNSADIKYEITYAARKGITIGSSGLLMTDSFPTGTFGTNDYDLNNSKGVNVDSIFIPRVDKTHVYAGNITVFMTPATQDPTVFPMFSNADANYTSNSPMSRIVVEADGPYSIQYFLRDTSITSPSPVESTTKTSSIPQIIASLLVAAVLRF	348				osc	0.95	129.08	3							P			SS	1		4.5977		0	11	0	348	3.16092	0	3.16092		0.0129		-7.648		39.1796	66.4456	31.1815	35.3918	47.5215	30.8622
3547	3609	WBGene00018547	clec-78			F47C12.2	Q20531	Q20531	MLEKYGRCRKRRLLKEVVLILLVAAVQPVLSSSKSTPEAQLTDVELTCPDDWIRHGTKCYLPFNIHQSWPFAMTTCQRYGSTLAKIQTGSENQFIASLLSKPGKPTEGKEYWIGLTVEVLDDDELYLWSDGTPTSRYVGFWRQDQPNFLNGSCALGKVERKDLEWRLDTCNLLRRFVCERPACVQGSYFCSSGSCISESKKCNGHNDCDDGSDEQNCPSAFQPNCRTYEKGESGQLSSTNYPNSYDPNLNCRHVLEGPINSRIELTIEHFETEPDFDILTVLDGGPAENSTTVIKRLSGSMETVQTITSATNMMIVQFRTDAQSNARGWQLKWRAVPFTCGGHFTAQAYIQSFVSPGYPKTFANGAECVWTVESTPGQVVSLIFDDFSLRAEDSLIVYN…	3514				osc	1.52	100.02	3							P			SS			0.59761		1	88	33	3514	1.56517	0.939101	2.50427		0.5553		-8.573		97.3029	96.2049	98.7865	7.39622	4.65733	0.663228
7001	7062	WBGene00018640	F49E10.2			F49E10.2	H2L060, Q20599	H2L060	MSPIIALLLVGVPTILAQSFNQTHLGFPEAWDGDKYRELYCPSKNIPKWLDGYFLCQLSASYGNSSAPEGEKLNHMIDAIGAVGSFHVSNGQVVFSAQYYPARPYKIWEFYDRNMSKASVPWAGWSDYNLTAMSRWEQVPANPDSARFHPNLDFWKVGNRIVAGTEAPYWVGYEFDVRTLQKFKLFPFKEENDIFSTPRHTMIPISMAIHERNDADGTIWGSFSAMNFEEQRFFQGIFTVDTNGVRRVVGLYDYGVWDTNACGSNDEYIGDKTLLPGYIHSITSTENFIILPITSLLINPCKFKEPPLNNVRSAIQKGGLWGMDFYDMVPMRFLIFNKKTLEFTTSKPLEVFPSMFVTHQLNAFEADDGNFVADMVVYDSHDPYVKYFYTDFLTKQLYP…	790				osc	2.79	114.8	3							P			SS			14.557		1	223	200	790	2.91139	25.3165	28.2278		0.6427		-7.094		21.1938	70.7566	28.2682	9.4817	9.46942	51.5033
7419	7480	WBGene00018965	F56D2.3			F56D2.3	A0A2C9C301, A0A2C9C2U4	A0A2C9C2U4	MKRILLISLFSAVVNGFYYKRTLYGDANEGAAMPDYVNAYYGFPTIPTQEPRRRPSFNMNPPQGYFHREHPFDFGPFGYMRARIGEANFGEPMEKTDRERAMERAKPGFWRQNQRETMDRIKKIIGEQRMNMEQKQMHIRRVLANESDEIRSKFADIHKRLIMKNNKMTVSSPVPELSKQAKKLEKEAKKIMENKKMSVEKKQEKLDKLMLKAPENVKNELNAMNDSGSTPAPIQAPFPAPGQTEALNRANPSMASQVEVMTRNAPTQAVVEARQIRVSEDGKTVEI	287				osc	2.75	109.15	3							P			SS	1		5.22648		0	60	0	195	30.7692	0	30.7692		0.0312		-4.257		69.209	71.6384	30.2456	70.985	79.0027	58.9929
12630	12658	WBGene00019901	R05G6.9			R05G6.9	Q21756	Q21756	MDLSKHIILISVIFVAAVESGRYRRQGLPGLGGLDGFNDLLPCNAFTRCNGKGLCLGTAKQSTCMCFLGWSGDSCDSVANLMDPFNLFSNNNNNNNNNQLFPNLFPTASSLNLLNNPFGLDDDALEMCTASDCNGNGVCVGSKKAPLCLCNLGKTGFKCESEISGLLNMDPSAPITFCSPSDCNNKGLCLGTKNSFSCACQIGYTGSRCEKTPVALCDSRDCSSNGLCIGTKDSMTCACYLGYSGDKCEKITGTMCEASDCNSNGICIGTKNLKSCICAPGYYGSRCESRFALLPGTEGMFCEAKDCNGNGICIGNKLLPMCICAPGFTGLRCELEPLCTGALQCSGNGLCIGSLKSYSCTCNLGWTGPTCAQSTLIG	378				osc	2.62	119.42	3							P			SS			10.3175		0	1	0	378	0.26455	0	0.26455		0.909		0.527		55.6104	12.6701	69.7396	79.9165	86.5831	42.3753
15803	15823	WBGene00020426	T10H10.2			T10H10.2	P91442	P91442	MFLLILLITPVLADIATYGYHPKGANPTLYSPEDSVLQLDEATFNDTIFGAQSGAAGYLVEFYSDWCGHCRAFAPTYKNLAKDVDGWQNIVKIAAINCADPVNEPVCRSNGVRFFPLIKYFPRDSLNSTEGSQIKPYSTVSEMRGQLTKAVMDDYALNRYPEWPTFDFLKDVVTYGELWNESSSSANHIAIIFETNQASLTGAQLLLDLSGNRDRLVARRCLKSHPLAEALKITDFPSLAIFKRGERKPVLIAELRRLLLREIDQFLGKPTDNHLQTIHFSSRKNKTIDCNKNPELCKPNYFVSEVDMLKAMRYALFRESARTGAPLQAANLSALYEFTSLLADTFPTTTIEGASDNSTVLHLDRSSRAVRVFSRLRDFIAEKGLEAPISVEDWQKEFL…	574				osc	1.05	109.79	3							P			SS			1.21951		0	53	0	574	9.23345	0	9.23345		0.0838		-17.845		10.4004	60.8008	7.71801	16.2122	22.1125	26.3056
18944	18951	WBGene00021939	Y55F3BR.2			Y55F3BR.2	U4PRM5, U4PMC3, U4PER8	U4PMC3	MIPYLLLIWGALGASEALPECQINEICSNCSLKAELSTKCEISQDVKEAFLFCNPRTKKIDIEHSSYLTCTNGTWKQEICSEDGRVHFSLSTRDCVDPAMQVFHSQGTSGSGRVGDVCSFNTDCLGGMFCAIGQCRCLSTYVAVDAYCYEKISPSDSGCFYDTQCASVWPDSYCKNGQCMCPSEDMIAVKTKDGTLCVWSTSSEPSCPLPSLPPPDSPSSLVVLPAAAGKTSVTIAPCNPHSSDTPKREEDLLGKQHDFKCSVRGFLGDEPEPQDVSDLYDCIDNSKFWKDQGMDTSSHPIGVCCMNRAFTCMQPKKGESDALGSVPRWYFNSVMGSCQQFLFDPTGSEVSPNNFETLDHCESYCKDTCPRGNPAYLSTKGSPNSARLPQTGCSTANPC…	1549				osc	1.25	93.74	3							P			SS			5.93932		0	23	0	1549	1.48483	0	1.48483		0.9489		2.224		97.3078	92.1076	94.4461	93.7436	96.4923	25.4557
19428	19435	WBGene00022287	Y75B7AR.1			Y75B7AR.1	Q9N2X6	Q9N2X6	MISSTKLSILALALVGAVLARPQFPGGPPPGMSAVPPPIAAVLPPETLARLEAIHADSSLSELEKHKAIDTIMVNLPEEVHDRIPPPPGFAQLPAEVQAQLKTIHRDKNLDFQERQAAIHGVLENLAPEFKRLLPPPPPGFPQRRQ	146				osc	2.43	127.04	3							P			SS	1		26.7123		1	41	31	146	6.84932	21.2329	28.0822		0.047		-20.424		59.7126	52.8519	32.96	83.3579	69.5185	87.0965
11175	11225	WBGene00003523	nas-4			C05D11.6	P55112, D7SFI4, D7SFI5	P55112	MMTIQRYSLVFCAIFATCWTASVVNNKQVIDTSVPQTETTLNDADFHSDLHQRYDLQTLGIKVKDDPTIGNYSEGDILLESPKKFVEENNKLGRNAIKQIYRRWPNNEIPYTLSSQYGSYARSVIANAMNEYHTKTCVKFVARDPSKHHDYLWIHPDEGCYSLVGKTGGKQPVSLDSGCIQVGTIVHELMHAVGFFHEQSRQDRDSYIDVVWQNVMNGADDQFEKYNLNVISHLDEPYDYASIMHYGPYAFSGSGKKTLVPKKSGSERMGQRVKFSDIDVRKINKLYNCPGVSGNNNNNNNNQINSNSIVNHPQV	315				osc	1.67	79.69	2							P			SS			6.66667		1	57	33	315	7.61905	10.4762	18.0952		0.1307		-4.757		45.9764	62.8224	13.7141	55.2788	41.8718	46.0255
2300	2366	WBGene00007938	C34F6.1			C34F6.1	O17644	O17644	MRLLLFIVALVPLVLSQYYMQQQMRPVMQPQQQRTMYYPVRTNCQNRCNQQTRYRWNVRPTNIRPNVQVQIRTIPSAPGPIRPVVNPAPPLPTLPTPPPSTLPPITYPRPTVGAPITTQQVLITETTTQPPTTTTTLETPAPESTPSMAPSHTDPTPAPETTVAPTTKYLRPERKQTSKAKYFNPCAVGQPLLNEFSTPISCNYLNQPNGGCPEDHYCHTGASFSTTACCPLVSSEDRCAQRRDTGEGDELVARWYFDNQAKECRRFLYKGIRGNANNFVTKAQCVDACETETVTDEANPCKFSNAAKYKNGSRIICGPNDDSMCPNGYYCHIGENPELTACCENSGLTDPCLLSINVGQGKALLKRFYYNTFSKRCTEFMYKGTKGNENNFLSYTQCQ…	1043				osc	2.55	85.81	2							P			SS			10.163		1	182	176	1043	0.575264	16.8744	17.4497		0.9723		9.815		95.9445	82.6455	86.5021	99.0224	70.8843	95.6153
13376	13403	WBGene00008027	scl-5			C39E9.2	Q18543	Q18543	MHTSILLLTALCAGAYAQFSANGQAAILNVHNTLRSRIAKGTYVAKGTAKPAASDMLKMKWDATVAASAQAYANKCPTGHSGAAGLGENLYWYWTSATITNIDQFGATGSAAWEKEFQDYGWSSNTLSMSLFNTGIGHATQMAWAKTNLIGCGVKNCGKDTNGFNKVTVVCQYKPQGNYLNQNIYTSGTTCSKCPSGTSCEAATGLCA	208				osc	1.67	51.32	2							P			SS			0		0	0	0	208	0	0	0		0.1044		-8		40.0688	36.6863	16.0919	48.3026	95.9789	39.9067
9881	9940	WBGene00010738	K10D3.4			K10D3.4	Q21418	Q21418	MLKLAALLLLAAIAVRAQHGTVGRPCEVSTDCGTGNYCAGNKRCACLTTYVEIDSYCWRKINPGESGCTQNRQCEAVWPGAYCRSGECRCANNQPPFRTRDGLVCLNYGFCPLNGNNPKFRIENQVQQCYGGADATCEAIGALSYDCICDSDDCTVNNPISFCCPSRAFACIQPPNEGYTPPGGGTTLNHWYHDPITGECRELKYQGYGGNANNFQTKDHCESYCKQTCNRGLPLYRDRTTGVKQEPVYCQGNDNGCNNPNYQCTTMGTLQQCCPTYLFICSRNGGIPSEVYNTAGGLPTEYFDVGIPDGSGNTSPRFYYDSREGRCIQFSYLGQGGNFNNFLSQDHCEKFCSRILCSAGEPLKDSSGERNMECSPTGSGANSCPSTHSCESTSGSTTF…	922				osc	1.73	76.44	2							P			SS			3.03688		0	25	0	922	2.7115	0	2.7115		0.9867		-4.054		94.4068	82.395	71.2257	99.2041	99.3245	36.5488
16834	16845	WBGene00011285	ttr-28			R90.3	Q22035	Q22035	MFINMLVFSLLCVFVLGQNDPIATKDVLGIGSMQSAAVSGRLICNGRPAVDVKLKLYENEIFFDRLMEEGRTDSNGQFRVLGSKREITTIDPKLNVYHKCNYNGLCDQKFTIHIPKDYVTSGSQPSRTFDIGTLNLANNFPGQSTDCLN	149				osc	1.59	50.57	2							P			SS			0		0	32	0	149	21.4765	0	21.4765		0.0053		-16.93		39.8256	25.6988	14.4461	73.4169	43.0189	77.6026
19759	19766	WBGene00013849	ZC84.6			ZC84.6	O62504	O62504	MVTQDLFLLLLLLLLTSCAAQIDGLRDKRQTGSGRVGDACAFNTDCLAGMFCNGGLCSCLTTYIAAEGYCYQKIDPGQPGCVYNEQCASVWPDAFCDTSAGVGTCRCGENKVERATRDGHVCLDVLDANHNTLAITCPLPEGAGYTSALSDPKHPRQNDGPGPVLCNTDSTNTNQGDEQAGDGNSACLFPSNGQYIADQYDCVEFVSSLDLTSSGYSEKANGICCPNRAFTCVQPTATGPNPTEPRWWYNSITGMCQQFLWDPSASGSGEHSPNNFRTVEHCESFCRDTCSRGAPEYIHRTSFLEQTPITGCSQTSACSHNYECKSVGSTQWCCPTVASVCGPVGGRPLDPSVNNRGTVYHSGVEKQGTATSTRFFYDPQSGKCSPFTYLGAGGNYNNF…	1491				osc	2.32	77.54	2							P			SS			2.95104		1	72	33	1491	2.61569	2.21328	4.82897		0.9331		-3.648		96.7772	88.3984	91.6753	98.8136	97.045	20.3341
20050	20057	WBGene00014006	ZK596.1			ZK596.1	Q23545	Q23545	MALSYSFIFTLFAFSAVVLAGPGGRHGHGGGGFGGAPQLPPFLQNVTAEGRQAFFAIVSNTSLTISETESQISSWAQTYGVSSQVTEFQTKVEEKLNEIKQNVTAVINNLSTVETQLEAIFANKSQTIREQFQALGQLKDQYPQEVGVLLFLAKPKGEHGGQGPFGGFPGGHQGGFPGGNQGGFGGNQGGFGGNQGGFPFGNQGGNQGGFPFGNPGNQGGFGGNQGGNQGGFGGNRGGRGF	241				osc	1.21	85.61	2							P			SS			40.249		1	118	84	241	14.1079	34.8548	48.9627		0.9931		33.329		82.9993	16.8632	31.1815	96.6937	98.3812	56.1066
586	653	WBGene00015076	B0238.12			B0238.12	O16488	O16488	MKVFIVLAALIGCYVYAQDAQILPVGGQVGGGQRLPCRGRNEEYKTCGTACEPSCTNPNPMCTKQCINNVCQCRSGYVRNEITRQCVRQAQCSRPGTGFGSSTPFPSQSPQRCGRNETFRTCGSSCEPSCTTPRPQACTMQCIVNVCQCSEGFVRGPSGCVRQRDC	166				osc	1.34	49.48	2							P			SS			0		0	3	0	166	1.80723	0	1.80723		0.4803		-5.143		72.4441	23.1565	35.7013	89.8944	87.4011	79.8772
2050	2116	WBGene00016180	C28C12.4			C28C12.4	Q18280	Q18280	MSYYSTSLYIFAITMATMVLAGPRGGFGGGPGGPGGRGRHGPPMPPFLQNVTDEGRRAFFDIARNQNLTIAEMESQTSTWAQTYGVSDVYSEFEANITAHRNEVQQNVTQVVSQLSAAQTALEAVMNNKNQTRQQMKEAIDNLKTQYPQEIPALFFISGSFRRGPGGRHGGPGGPGGRRMGPGGRGGDSREGPMMGGMGRGGFGGQGMGGMGAGLGQGRRGGPDSMNESSDVNDF	235				osc	2.18	66.97	2							P			SS			36.5957		1	95	72	235	9.78723	30.6383	40.4255		0.6424		8.999		82.2451	37.8728	30.2456	97.4453	97.9268	59.7765
15851	15871	WBGene00020465	T12E12.6			T12E12.6	A5A631	A5A631	MKSSFFLVLLLFQTANSWPHNIIPLSYDLLFKLPIHEFNGFTGSMVLHFNLSSLSDNITLDAVDLHSFRNISLIRSADLTEPTLKSIKILKEKVELKFEKSLFPGQYLLTIGEYNGRIGNSSEALFERRNPLLYTTHLQPNHARRLFPCIDHPAVKALFRLSIVHPTDTVAQSNTIAMDVHVENRKWQRTIFQATPLLPAYLVAFSVMPDSNLQLSRQTSFGVTVRVNGESRGLVLRVLDCALASFEILAGLIDVPLPLNKIDFILVPEYDGGMENWGHITVSETLATSGDDAHLIYLIAHEIAHHWIGNRATIDSWNWICLQEDLTDWMALKAVKALLTDEIRLQRFQLAQYVEIQLVEDFLSPGHSLYMPSKINQELINRHCYLKGVVLLDTLESVV…	641				osc	2.72	68.42	2							P			SS			1.87207		0	5	0	641	0.780031	0	0.780031		0.017		-10.031		6.67404	12.2402	29.2606	11.7932	10.0049	15.6448
6689	6750	WBGene00044191	F43D2.6			F43D2.6	Q564S3	Q564S3	MKYLLIPFLLIGAFGIVESTVKCPKSTFGVELECAFECCTSFEGRDQGYYCCGLEEKQLLERGHHNVEGAPRADRFLAYGNTFQVDYTMLIIGLLVSIVLSVLLSFFCCLLCNGCWLHRRRNPQQYESVHNDNGWYPICCGFGIPMGTVVFSTHPPQYREESEMYGGSSMSSLPSSKQRVRFNPDGTPRGVLKNGHEGGQPQYYRD	206				osc	1	69.21	2							P			SS	1		19.4175		0	47	0	206	22.8155	0	22.8155		0.2146		-7.058		60.732	9.11078	39.9975	79.9165	79.0027	88.9364
54	39	WBGene00000017	abf-6			T22H6.7	G5EBS3	G5EBS3	MFRKLIIATFVLSLCDLANSVTICSSSSLLSTFTDPLCTSWCKVRFCSSGSCRSVMSGSDPTCECESCGFGSWFGSSSDSNSNQPVSGQYYAGGSGGEMATPNYGNNNGYNNGYNNGNNMRYNDNNGYNTNNGYRGQPTPGYGNSNSNFNSNQQYSYQQYYNNRNNQYGNSGYGNAGQAGQTGYPSGYQNLKKKR	195				osc	1.74	2.24	1							P			SS	1		58.9744		1	186	148	195	19.4872	75.8974	95.3846		0.9937		45.423		81.2307	65.3844	53.0386	95.3181	97.1948	62.7733
11211	11260	WBGene00003573	ncx-8			C13D9.7	O16241	O16241	MGKIIWLFGLLSISIVGTNSLLGYEYENYDYPTITMARNASMYDGMPFTAEMCAASECELHKGWTSEEKCAYIKCNQDSCEGGGYLTWSHYVKCQYNIGARVVLIIVGIIYLIFLFVVMSTIADDFFCPSISGIVTHLKMSESIAGVTFLAFGNGAPDVFGSISSVLSTPKPKAALALGDLFGTSIFVTTVVLAIIIFTKSFKVAIIPTLRDLIFYMITLAFITFCFLKFDKIEVWMPATFLGIYAVYLLTVIAFSIYRTRRKNLKKKKQLESEKDDESAISRPESVASNMPICEKLEKKTESMSVSTLFHVMVGLSRFMKKLNRTNKIQSIENKKQGFVNEGFSESLDADELTLKRNRMISLIFRNKTLDTDLESMKTLDEMESSDDEGREEEFAYAH…	703				osc	1.91	19.29	1							P			SS			5.6899		1	163	104	703	8.3926	14.7937	23.1863		0.0214		-21.293		1.08573	0.0687792	0.348809	2.63817	5.72587	9.16482
12342	12371	WBGene00004144	pqn-60			R11G11.7	O16948	O16948	MKSYLSIIALFAVVFADFDGPMFLRYQPRNIQQSYFAIAKNYQLSQMQKNQQLQQWAQMNNLSNEYSSYTQQRSQQEQQVSQQTSQIISQLSTVQNQLESILNNDNQTGAQKRQAIQSLRYQYPQEVSVLFHIREVSMKRMGIDDDHDDSYESF	154				osc	1.9	4.21	1							P			SS	1		33.1169		0	13	0	154	8.44156	0	8.44156		0.0073		20.732		61.2872	60.0197	28.2682	55.2788	76.4849	62.7733
13377	13404	WBGene00008028	scl-6			C39E9.4	Q18538	Q18538	MPSLLVFATSLLIVLVDAEFSSSTQQFIVDLHNSFRSKLATGTYSINGTLKPAGSNIRKMSWDSTLATSAQTYANTCPTGFSNTQGTGENLYWRTTSANISGLDIYGGAASVSWEQEFQKYGWATNYFSQELFDTGVGNGTQMAWAKTNLVGCGVKNCGKDSTGLNKVAVVCHYKPLGRYVDQMIYTAGFTCSQCPTGTSCDQTTGLCA	209				osc	1.2	20.13	1							P			SS			0		0	11	0	209	5.26316	0	5.26316		0.03		-8.034		48.1749	35.5072	30.2456	78.0226	91.5942	47.2759
5463	5525	WBGene00008841	F15A4.6			F15A4.6	O17815	O17815	MCKFLAILAFIVVSVGAQTTCNAIGLLGPSVGGLCPSGYTVVTSGDCCASDQVVTCADKTNANGVNECPGLKSYCNNSQYKTLMTQQCAKTCGFCTGTPSTCADLVNPSTGRSECAANKSRCNDSVYRDMMKTQCPKTCGYCK	143				osc	0.75	19.84	1							P			SS			0		0	33	0	143	23.0769	0	23.0769		0.0139		-14.867		47.1334	23.1565	28.2682	70.985	89.4719	54.0604
12657	12685	WBGene00011070	R06F6.7			R06F6.7	Q09416	Q09416	MRSWIPLLVLFAVLAVFAQAGKSSESDESRRRPSKSSESSDSDSKSSDSDSSSSEESSGDVPSEAPNTDSTPVEILAAAKPDSGILLGPGDNRVKRDGLPSFYDIRKKRGLPSAYDIRRK	120				osc	0.64	31.75	1							P			SS	1		40.8333		1	79	70	120	7.5	58.3333	65.8333		0.1608		-25.51		72.702	65.3844	46.0599	78.0226	65.2837	83.7386
18677	18684	WBGene00013048	Y50E8A.5			Y50E8A.5	Q9NAF3	Q9NAF3	MFLRSISILVVLYTYRLRTADGYMCHKCASTDAVWNWVKYGLPVNQGDSIVSDDKCLVENKLKKDGDSCAGYCMTINITRTDDEAAGKTIAIVRDCQVRTRNLPDLLESDAPLCTSYEKLVNRRNVNITTCYCRGHYCNGLGFAEATRHSKALELPVNSIDPKESSGFPWFLVHLSLISFLS	182				osc	0.68	17.93	1							P			SS	1		0		0	38	0	182	20.8791	0	20.8791		0.0062		-28.283		29.214	25.6988	16.0919	73.4169	45.1904	59.7765
16832	16843	WBGene00013079	ttr-26			Y51A2D.11	Q9XXR5	Q9XXR5	MISAQLFAIFSVLVISTDGLLGIIGSKQGVTVTGKLICNGQPASNVLVKMYEDGTFYDSKMGSVKTGSDGTFRVSGDQNKIRTIDPKVNIYHKCNYNGLCSKKVSINIPKNAVVSGSGQNARNYDIGTINLANKFSGESTDCIH	144				osc	1.69	17.94	1							P			SS			0		0	25	0	144	17.3611	0	17.3611		0.0057		-12.575		47.3692	20.1204	13.0115	62.5522	70.8843	53.4463
17016	17027	WBGene00016762	ugt-24			C49A9.8	O44149	O44149	MNLVTTFVFIFKLLNAALPYKILIYSNLYGHSHIKVLNTVADTLTDAGHNVTIFRPIIESSQLDKSSVKTKNVIYIEPDEEVVEKMSKIDQFSGSLWTFDSTHPSAMIAKSNALVGFFGTQCKKVMRQQKILDQLRDENFDLAITEPVDGCAYAIFEYLKIRDHVTVLSCVRFDHVSDILGQPIAPSYVPGTQSFFNDRMTMKERLLNFIQFYYGRFTFANILDQEYEMAKDILGIQRSWREVLPEASFIFSNHIPVLDFPSPTFDKIIPIGGFTVKTNEKSLKIDKKWDAILNIRKKNVLISFGSNAKSKDMPEEYKKTLLRVFSSMPDTTFIWKYEDPNVNIAKNLDNVFISSWLPQNELLADSRVTVFVTHGGLASVMELALMGKPAIMIPIFADQ…	528				osc	0.85	20.36	1							P			SS			2.65152		0	11	0	528	2.08333	0	2.08333		0.0235		-16.864		9.2901	43.4169	7.33972	15.0454	6.71088	28.8873
12166	12196	WBGene00016782	phat-3			C49G7.4	O16225	O16225	MIALFSVLIAFLTPQANAVISGELNCTTYNGTAFVYTPSATACSNAISDSSCAALYPASDPATGYPAPGNDVERPFACYTTATPTPAPVVPDMRSAALKNCARTCGLCCKTADFDCPNVQFPRLTCSTITNEQCRSSVWRTIIATDCPSACGFCNQGGCVDGVMDCANDLSICNSVGMQEFVNQYCQRTCNRCSSSTAATGTGGSCGGRYIADSSTACAAWKLNGFCTNTFYTAAQRRSYCATTCSLC	248				osc	0.66	10.1	1							P			SS			11.2903		0	28	0	248	11.2903	0	11.2903		0.974		-9.051		53.9523	59.1697	18.8578	78.0226	96.3719	44.1489
17784	17791	WBGene00022445	Y110A2AL.9			Y110A2AL.9	Q9N499	Q9N499	MMQLVAILLACALSVSSQINNKICIGLTELPTNGLCMGDTVMVNGNMCCESKNVAVSSLLSCKSDMTPAGYGLCRPGYTLMYGYRCCATKDVFDPTTATCYTGYGYSNSVMGSAVNGVCPTGYSVTKGNLCCKTAFVVVD	140				osc	1.43	23.93	1							P			SS	1		0		0	16	0	140	11.4286	0	11.4286		0.1018		-12.889		55.6104	18.3837	30.2456	86.2343	91.5942	57.5903
2564	2630	WBGene00045379	C45B11.6			C45B11.6	A4UVK7	A4UVK7	MSSWFFFSVVVISIFSILLSIYIHKPDFPPLEIDPDDYWKLDDPEKDDDTIYSFTIDIKESEVSNFKEKLESERFLPTLYDTNYDNYLNELKQVLLGFNWKQHQHFLNTFKQYKTEIEGLKIHFLRVSTPPKDKKSRVVPLLIFHGFPGSFWDFFKIIPILTNPSRHGFDFGVEEAIQFEVIVPSLPGFIFSDKPTKQGFNAIATARIIAKLMYRLNLNNYFVHGTEGYGSDVATLLSSLYPTRIAGLHLSNPFVNPTFSTFTLAKYALKAMGQKDEDRENQENRETGKDNRDQMTDLADYFKQDKFAYPTNSQAFGAAFLNSPSGTAKYIESRWKQLSTFFAETNLNELFTMDEIATEIYLYWLTDTLPSALTILDSSFNFESVWLSSQVRIPTAVSY…	457				osc	1.91	22.27	1							P			SS			3.71991		0	41	0	457	8.97155	0	8.97155		0.0584		-13.401		11.4444	15.6276	8.11594	28.4869	11.3707	57.5903
11162	11212	WBGene00003544	nas-25			F46C5.3	Q20459	Q20459	MQIYLGITICLVAFLTVIDCAIPYYRTHSNFGSLGRRKVRQVQRDLTYRWPNNTVPYYVGNVTSTIKKSVRLAIEELQAWTCIRFQNVNEKYSDGDSVRIVDLGSCSSPIGRQQIGTQDVSLTKNCWGMGTAIHELMHAIGIEHTQSRSDRNRYLDILAQNIDNRDLPNFELLSPRLWANLVPYDYGSVMHYSADSFSNKDDEQTMLPKDRSFIETMGSMIPNFYDFDQINQYYQCYDSCRNAGQLANCANGGIPNPNNCQVCNCPMGYGGDLCDQRPEGCGSTLVATDRWQKQKLSVRFSRNDDQYFTFCNSWIVGPSDRTLQVIYEITSDSIRRQICSFGCYEGGIEVKHLQDPRITNDRDCCLNTPLNLTTTVNPLPVILYTSGATVTYDFSYRYV	399				osc	1.38	322.18	8							P			yes, but by other			7.01754		1	33	33	399	0	8.27068	8.27068		0.0687		0.994		26.9148	42.3041	18.8578	84.8882	31.9725	33.4046
19644	19651	WBGene00022505	idpp-15	new	special interest	ZC21.3	P34587, U4PBK5, G4RUC0, U4PBY4, U4PME0	P34587	MNGSSSSTGQYNQQQYNSQQQQPQQQYNTQQYNPQQQQYNPQQQQQYGTTSFSSNGQAMYQTGTTNYPTLYQPSSSSPQYSNGAPSTTYSPTSTYGYSSQNYNPSSASSSNVYRNPSTSYGNTQQSNQNYVAYDTTNQNSPYYYQRVPSTAQYNSVLGVNAGFPQSSNQNQVLRDQSNNQGYMNNNQGMYNTQTTQGYGNNQGSYQNQMMYNNNNPQNTQTTTFLYASSIQPQQQQQQQQYNNQYNNQQMNSNGYNNQPMYDQSYSTQQYGSSTPSPQYSADSISCCSQVSSTCCYQTQQGYNTPSNNVQYSPSVYQYGRK	321				osc	2.11	338.72	8							P			yes, but by other			58.567		1	321	321	321	0	100	100		0.9987		48.87		90.0761	91.6949	65.5736	74.65	98.7939	53.4463
11126	11176	WBGene00002348	myo-1		special interest	R06C7.10	P02567	P02567	MSLEHEKDPGWQYLKRSREQQLADQSRPYDSKKNVWIPDAEEGYIEGVIKGPGPKADTVIVTAGGKDVTLKKDIVQEVNPPKFEKTEDMSNLTFLNDASVLWNLRSRYAAMLIYTYSGLFCVVINPYKRLPIYTDSVARMFMGKRRTEMPPHLFAVSDQAYRYMLQDHENQSMLITGESGAGKTENTKKVICYFATVGASQKAALKEGEKEVTLEDQIVQTNPVLEAFGNAKTVRNNNSSRFGKFIRIHFNKHGTLASCDIEHYLLEKSRVIRQAPGERCYHIFYQIYSDFKPQLRDELLLNHPISNYWFVAQAELLIDGIDDTEEFQLTDEAFDVLKFSPTEKMDCYRLMSAHMHMGNMKFKQRPREEQAEPDGQDEAERACNMYGIDVDQFLKALVS…	1938				osc	0.72	325.74	8							P						10.0103		0	127	0	1938	6.55315	0	6.55315		0.6094		-16.909		2.67256	97.7499	89.4006	0.658315	59.7028	0.643577
16669	16681	WBGene00006583	tnc-2		special interest	ZK673.7	Q09665	Q09665	MGDVVADALEKLSADQIEQFRKYFNMFDKEGKGYIRATQVGQILRTMGQAFEERDLKQLIKEFDADGSGEIEFEEFAAMVANFVVNNENDEGLEEELREAFRLYDKEGNGYINVSDLRDILRALDDNVSEEELDEMIAEIDADGSGTVDFDEFMEMMSGE	160				osc	0.66	337.49	8							P						8.75		0	6	0	160	3.75	0	3.75		0.036		-30.27		30.1253	50.8622	7.33972	49.4154	61.1373	58.9929
16672	16684	WBGene00006586	tni-4		special interest	W03F8.1	O44572	O44572	MSDVDADEARKMAERERKKEEVRKRLEEASRMKKAKKGFLTPERKKKLRKLLMMKAAEDLKQQQMLKEQERQRILQERIIPLPDLDNEDDLEAVYDEIRERLIDLESENYDVSYIVRQKDFEINELTIAVNDLRGKFVKPTLKKVSKTEGKFDKLKKKEATKVDFRAQLKVVDKNEFALDEEDTEKKEKAAWAK	194				osc	0.65	318.93	8							P						33.5052		2	100	100	194	0	51.5464	51.5464		0.0781		-40.673		58.8283	55.7062	47.379	44.1562	81.5181	76.0771
11127	11177	WBGene00003514	myo-2		special interest	T18D3.4	P12845	P12845	MDYENDPGWKYLRRSREEMLQDQSRAYDSKKNVWIPDSEDGYIEGVITKTAGDNVTVSIGQGAEKTVKKDVVQEMNPPKFEKTEDMSNLTFLNDASVLYNLKARYAAMLIYTYSGLFCVVINPYKRLPIYTDSVARMFMGKRRTEMPPHLFAVSDEAYRNMLQNHENQSMLITGESGAGKTENTKKVISYFAAVGAAQQETFGAKKAATEEDKNKKKVTLEDQIVQTNPVLEAFGNAKTVRNNNSSRFGKFIRIHFSKQGRVASCDIEHYLLEKSRVIRQAPGERCYHIFYQVFSDYLPNLKKDLLLNKPVKDYWFIAQAELIIDGINDKEEHQLTDEAFDILKFTPTEKMECYRLVAAMMHMGNMKFKQRPREEQAEPDGTDDAERAAKCFGIDSEEF…	1947				osc	0.75	301.02	7		1.80979	1.77604	0.0120668	0.00428346		P						5.8038		1	165	46	1947	6.11197	2.36261	8.47458		0.7941		-16.032		2.91329	98.3518	91.6753	0.417588	69.5185	0.663228
16676	16688	WBGene00006589	tnt-4		special interest	T08B1.2	O44556, K8ERV5	K8ERV5	MSDEEYSEYEDEEVEEEEVEEVEEAEAEEEEDTEQQEEESGEALNEGEKAMLAAKRRHENDEQAKLEDYEKARRSEREKEEEELEKLKEKQAQRKLAREQEEREAAERKRLDEERRQKEEQERRARAEEEKKRKEEEKLKKAQMMGGGFPGQQGGRNFVIQKKEESAGVGDRFGNIVQAKQEMGMTKEQQEEAKSVAMAGIRKSIAEASTILPNDMKAKIKELHQRICKLEAQKYDLEKRHERQEYDLKELNERSRQVARANNAKNGQVSGDDTGGRHPPKVQISSKYDRQIDRRNFKERRQVYENKIAFPCFPGVAPPPALYEKVIKKMDYEIQQELEAAEEEEDY	347				osc	1.02	307.11	7		2.54573	3.17557	0.00733542	2.51286e-05		P						41.2104		2	252	230	347	6.34006	66.2824	72.6225		0.8359		-12.514		87.1383	80.0442	73.7927	82.5129	94.6819	55.4041
11129	11179	WBGene00019064	myo-5		special interest	F58G4.1	Q21000	Q21000	MTHEADPGWQFLRQSPEQLLAATTKKFDSKKNVWVADPEEGFIAAEIKSSKGDTVVVVTSKGVEKTIKKDDAQQMNPPKYEKTEDMANLTFLNDASVLHNLRQRYYSMMIYTYSGLFCVVINPYKRLPIYSESVCQMYLGKRRNEMPPHLFAVSDEAYRNMTNDRENQSMLITGESGAGKTENTKKVISYFAMVGASQQSNKKKSKKDKAQVSLEDQIVQTNPVLEAFGNAKTVRNNNSSRFGKFIRIHFNTGGKVAGADIEHYLLEKSRVIKQAPGERSYHIFYQIYSDAVKGLREKLFLTRPIKEYTFVSQAEVTIDGVDDKEEMLITDEAFDIMKFTATEKSELFAITAGIMHMGELKFKQRPREEQAELEEGKEGELACKLYCVESEKFINALLK…	1974				osc	1.01	276.65	7							P						8.20669		1	153	58	1974	4.81256	2.9382	7.75076		0.6857		-13.276		26.9148	98.3518	95.6227	0.623925	91.1275	0.923606
8058	8119	WBGene00001410	feh-1		special interest	Y54F10AM.2	Q9BKZ9, A0A0K3ARY0	Q9BKZ9	MREGTPRVRIEVNKGSNRPSQFVSESEEQRLQRVQSRDSDTATMNFVTDDRMMEEHDEYSAFKEAYEEEESREYVIENGVKRLVNQHYDSRGYSSAGRGQKGRREEERRRNMAVDYSSQDFRQSLAAIDQASRDGAISRGEDGVRVRQIGDTTIMTEHRDPYSFYWQLDQARREAESPPRRPPPTDYVIDEEEEVLETVYSPEADDVMFENQYRRPVRHPLPPPPPIMEEEPKDLPPGWEKHEDPQGYSYYWHVDSGTIQRQPPPPVNRETQADAPPPQIIQLPPQQPVIEEHAFKQTTTKRRIEQDEMSEREIEDVAMIENGDTYHKPVRFAVRSLGWTDISEDELTAEKSSRAVNRAIVDLTTRSDIDSIPKWGDGRELIMELDDNELALLDPDSMN…	665				osc	1.24	249.26	6		2.20139	2.13892	0.001873	0.000329214		P			yes, but by other			13.2812		3	304	243	640	9.53125	37.9688	47.5		0.8821		-11.782		72.9059	78.3616	65.5736	80.7738	7.65414	22.4785
12329	50	WBGene00004123	pqn-36		special interest	F39D8.1	Q8I4J3, A0A2X0RQ66, A0A2X0SX51, A0A2X0RCY9, Q20189, A0A3B1E067, A0A2X0REC4, Q8I4J4	Q8I4J4	MNILLNYCNILISIKYVSPGCLSQCVNCAPQPIYQYVLNVPTNYLQVPSTSNRSPCCVPTSNVQTIQSARAFTNGAQGSQVIMYYNGQRVVANSQDPQQQQQAGSNFNQAPNYQNPGPIPGYQTGYDQNQNQTQSGGYYPNNLNGGVVAGGATTGTVVIGGVTQQVTQGGQPNVGGNVGGQNQNVGGVVGDQNQNQYQNQNINAAGVVGNQNQFQNQNQNINAGGYVGDQNQNQFQDPNQGQYQNQNQNINTGGYIGDQSQNQNQGQYPDPNQGQYQNQNQQNQNINAGGYVDQNQFQGQDQNINAGGYVGNQNQNPGQFQDQNQNNYQGQYQGSTLAPSAGEVDYQPFTPSGNTDYNNNAQGFDQQQGQQGQYQQNQNDQQVIYPSGGVVAGGAVTGG…	945				osc	2.56	259.71	6		6.47137	16.0843	0.000233896	0		P			yes, but by other	1		35.2557		1	944	929	945	1.5873	98.3069	99.8942		0.9983		46.999		99.155	98.5949	89.9975	99.5922	99.7789	62.7733
15788	15808	WBGene00020421	chtb-3	new	special interest	T10E10.4	Q22378	Q22378	MELYISMLPFLTILLLPHPSQGIENSPSAGKVCMTVEHLRPADNSTQFYECAPLNEDEVKGYALSKKYLGVWNLRDCPKEHEFDEPKQRCIEKKTFRRQQVACAQNVQASGCVSACQAPTAVANQGMECNWRSSPLQQDPASNAYFFQCVPSSPTEGCGEWTRMQCSQSTVFNSDLNVCVPLAIQNSCDSSTQQPVCSCSQVSSSCPGTSQCQNKVCCQQTDTLNLNNLIQHQAPLCPGSNVPPLGSCNEQCPQYSACTPGLGCCPVPVNEQPTGMIKITLCPGSYSPPFGVCGSCPSGTQCNQQLQMCCPLQQQPSTDIVYNVVLLCPDGTPSTTSCSKGCGPNNACFQGACCPIRCPVGQNAVGFCSSGSCGVGSCYSKTTCCQEPIKLPVCSNGMI…	916				osc	2.52	235.04	6		15.2087	14.2039	0	0		P			yes, but by other			5.67686		0	23	0	916	2.51092	0	2.51092		0.9603		-4.093		96.9492	80.8671	93.3923	98.5556	97.7106	53.4463
4114	4176	WBGene00017009	idpp-10	new	special interest	D1007.13	O01875, A0A9S6	A0A9S6	MAAQDPAFDIEFAQPSSPASTSSTAYSPPPATSSTTYGSSIPSTYPPSTFAPSAYPTSSSWGSTHPPEDLPTVQQAFQQQQQSYGTVQPQVSLAQSLIGNSNGFGGLPGLLPPPSNGDCPWCSGYRGKRGPDTEKEKKNEKI	142				osc	1.74	225.72	6		6.99026	7.73462	0.000380763	0		P			yes, but by other			38.0282		1	142	142	142	0	100	100		0.9587		5.075		78.6048	63.4807	52.4048	91.4616	93.466	87.0965
15587	15607	WBGene00020270	cht-6	new	special interest	T05H4.7	O16512	O16512	MAEQRANKTSRCSISSVLFRAHSPLSSASAFNPCFVRSGLSASFPKSDSLCTLTDASFNPMQLLFLLLFTPYTIVGESPDFCPQHPVYGKEPEEDCAQASDPNELPKSPLEKWFTKQMFEDLFPKSNIGMGPHPCLPYSYESFIMAARYFPEFGAAHPNKQFKADEHHKRDVATFFAHALQETGENDASVYNNTDLTLEQAHECFYRGGFYNWFERGPNSTFLSPAAPGFSPFDGKRCTDEGRYCKSDPIIDFWYPCNSDIESHSDKEYHKGCYFGRGALQLSWNYNYGLFQQFLLTKGVKVDLIENPNLVMTKMDPPLAMMASLWFYMTPQPPKPSMHQIVTGDWKPSSKNRRAGYQGAIFGPTSLIINNECGGEDPDEPGGPGESRRIKAFKWFCKY…	511				osc	1.98	183.73	5		2.0533	3.85709	0.0290829	0		P						6.06654		0	31	0	511	6.06654	0	6.06654		0.3545		-9.595		78.5139	75.8168	27.2144	94.397	81.5181	96.8632
6948	7009	WBGene00018607	chts-1	new	special interest	F48E3.8	H2L042, A8WFH5, H2L041	A8WFH5	MRLLFLVFILAEIMLQNEIMADHRTINQSFRGNFFRRRNYDGPRAYQIAPDLTCSYDNQCAGYPLAICHSVCQCVKGALNTGTTCIASSTAIQTSVACPAGQTYIREAGVCMTVQQPGEPCQYSQQCSALEPGAYCLKMRCECVYGMKKSSNGCTFVNNDCKERGHIFISEIGECREVFPPGGKGCSHNLQCSGAYPDATCFMQTCTCPPNLPVAADGTCGRSCPNNQVYSGVTGECLPEKQPGQDCIYSSQCQASFGGLVCDKNTCRCPNGLVFDGLKCSHGCPPHKRVIDKEICVEGCPSGIVEVAGRCVKQVSIGQPCVANAQCNFGSFCQSGTCQCPPGFYVQDEQCQAIESEPNESCQNNEKCTKGSVCYNGKCSCPRNHELINGHCQQNRAAA…	1602				osc	0.96	139.9	4							P			yes, but by other			1.93508		0	21	0	375	5.6	0	5.6		0.8714		-11.729		94.5787	75.8168	94.4141	58.9732	6.11398	5.7406
3279	9	WBGene00000497	chs-2		special interest	F48A11.1	G5EBQ8, A0A0K3AR16	G5EBQ8	MMNTLDHRPLGRMETMEGKPDEDEVPTSSNSDAKGKGYYYSSGTVPTDDSTLEEKCQQKTFDPSCPTPKTPVIVPNREFDPNFSTVTENKGWDIFRLLPPKPDRLGHGFWHDASLQVLKLATFLVLFLLTLGSAVVAKSTFILMTSAIGWGGQTITICNQVISEATQNTVKLKNAHVVKWVWATLLALSAPEALCFVRSMHRTMFRNVKRPTFIQFVFVLIIETFHSIGVGILVFRIFPDLDAVTAAQLTNAMCFVPAILSVISRKPNKSALLLVIIDFAAIAAQSSGFWALPMFLPNLQKHLVAIPVSLTLISLAWWQNFVHRDSVFPPVRTLAKFAQRLSERRSKTYAFVSLWKICIYVVCCFLFISSRMKIEDMLQKDPFGEKLLSVAGHDMNQTQ…	1668				osc	1.93	152.35	4							P						9.29412		5	443	419	1668	1.43885	25.1199	26.5588		0.1237		-13.956		0.82535	66.4456	39.9975	0.992385	1.1324	2.1297
1933	1999	WBGene00016106	itm-2	new	special interest	C25F6.7	H2KZ11, Q8MQC3	H2KZ11	MTIFTKAETDTEKKTVEGVKEDTPKQVVVCEADEEKHISNCGWVPMEGGNFDRPKEKRSSSFGPLSIIRLSPSPLARTPSPSPPDYENAVNARRMRRCTKLTFTLISIFSFVILVSFFLYQQGLISVAYQKGVYHGWNAATFSNRGMTERLVQNVEINANDSYEKIDVPKFGSNRPAIFLHDFKQNLTAIVDTVGNRCFVKELDRTKIRNPRMLMEMLRNIDVMAPEVAYAQTRVVRETYNVGDELTKADISTFNSTILSRHCAFRQTYKLKKQEAQSRSRRASGMTPSMTFASMAGEEVQLEEISF	307				osc	1.98	110.42	3							P						4.88599		2	109	107	307	0.651466	34.8534	35.5049		0.114		-13.158		44.7875	62.8224	19.7494	43.2302	46.2786	44.1489
11245	11294	WBGene00017842	nep-12		special interest	F26G1.6	Q19831	Q19831	MNKKSKTVMIDYSITKILERNKKNARLAAVFAALFILTLLISISFITIVAILSDGFSTLISGSELCSNTEGDAYEVKNSNHVNYGSDNSTCLTPECIRLAASYLNNMNRDANPCEDFYEFACGKYATRKVIAEHEKKVTVLSEMKKEMDRHLKDILEKTSRENTTRSMKLAQIYFDSCMDEFSQDDLGVQPLMSMISNLGGWPLLTNARFDSIDFQWEVLAGHLALYGVDGIFRVFVHSSFDDSDKNVLMFSPPKLFLEKKKFYREVPSSNVYLQYYRQYILSLLSLLGVDMEDETGVIEYQVDDIIDFERRIANLTRIELSRNHSSINNMITFGEFKRKYDKINWDAFFNEEMRGNLGRMPDSLVINVVDVNYFDNLYSLIKSKPLSSINNFLMWCLV…	734				osc	1.14	134.42	3							P						3.13351		1	87	87	734	0	11.8529	11.8529		0.0639		-14.586		7.03513	63.4807	6.61263	17.0818	20.8401	14.4952
9118	9177	WBGene00002024	hsp-43			C14F11.5	H2KYS1, B0M0L8	B0M0L8	MTLATRHADFTRDKLWKENDLWLDDFRDWPLDWPKPRDFFHRFSRDVDSWWKDWPTDWPRMDAVMPRFSSQLDRMDRNWRSDPYWMNLYPRWAEPIFKEGIDVNSNVVNDDRRFAVDMDCYQFRPEEIQVKTLDDTLMIEGRHEDIRDKDNFTKMYFVRKYQLPRDVDFNSIQSSIDAKGRLQVEAGKFNNMALQGRERMIPIEGAGHHSPRFENGTLRSQRGPNSPIHVQTEHDGRSVSSRSGSRLNDSPGSRDVYSSHSYSYHRSDSRNRLSPNDVNITRNDNRTYSPVTPRITTSGSYNTAGNANLHEERSSSRAQSHRSESRNGGYRVESPVSTTTGILRNGNSDSPNSTQREYRSIQILRKTY	368				osc	1.21	329.65	8							P						12.2283		1	184	157	368	7.33696	42.663	50		0.1083		-1.971		83.4144	84.2054	46.7207	97.1555	29.3712	95.8241
9294	9353	WBGene00002125	inx-3			F22F4.2	Q19746	Q19746	MLGVPFIDRWLSETFKPKTFDDAVDRLSYVTTATLLAFFSIMVSCKQYVGSAIQCWMPMEFKGGWEQYAEDYCFIQNTFFIPERSEIPGDVEDRQKAEIGYYQWVPIVLAIQAFMFYLPSWIWSSLYKQCGLDFPSVISEAEALRSQDSETRTKGVNKLVDFIGDILDTRSKNEYGRFYCYRFGKGLGSMTSMLYICIKLMYLANVFVQFIILNKFLGNETFLWGFHTFADLYAGREWQDSGVFPRVTLCDFSVRKLANVHRYTVQCVLMINMFNEKIYLFIWFWFVFVLITTFINTLCTIYRLSFDSSRHNYIRSLLSGPVNNFKDEKAMIASFANNGLKQDGVLLMRFIDDHAGAMVTKEICEELFKKHGENLQHNRDFHHGHSTKSTSPGLEEGHH…	420				osc	0.8	329.65	8							P						0		1	45	45	420	0	10.7143	10.7143		0.0351		-20.715		8.31491	7.96365	1.22083	16.6175	18.4205	44.1489
11527	11571	WBGene00003606	nhr-7			F54D1.4	Q20765	Q20765	MQSYTNRICAVCGDTPAKIHYGVLACFGCKGFFRRAVKDGRNKYVCRFEKNCEVTKFERNACRYCRFRKCLLVGMNPDYVRPDREKSKKGKTVLSKKKSVSRSLSYRLADPSDWTSFLSPSSRKQLSEIGKLAETCSTSTNFDGIGNFSLKSLIADRSLARKTGDSEAMDCSNSPRQLNEQFLGIERIVQCVDYIDRFLVMLEEEHCRKFSVEDKSALISDTMIHLLLFESTSRFVAKGAPGLEDLKLSLAQLPICTTHLTQKIADVFETYLRKPPSIIEYSVLKAYIVLSAESTVLSNSLNESLSLARENLSELLFKVIKHSRNKTSISAANSLSTILHFVYESRNLASRIRQSQQPFFVRDSDPKIPFHKILTDIINPEVSDLLLTTANCRKLSTQM…	536				osc	1.26	321.28	8							P						12.1269		2	198	186	536	2.23881	34.7015	36.9403		0.0862		4.41		55.8143	73.0066	70.4569	56.5291	16.787	47.2759
11302	11351	WBGene00003702	nhr-112			Y70C5C.6	O62496	O62496	MCKICGSSESEPHFGGTSCRACAAFFRRFYHSKKLGLKCTCKTRQSNAHPCRSCRIRKCYEAGMTPEKIQLTRDKHLNRTIKLEGPCSSLDTPITSRQTPNLYCVLSNWHELKMTREEMNSGSLNNCNIFELTSFVLRDLELTWRMVSKAFPTVEVLEDRDRQALLRNFVPKLWQIEPILEYRECAEKFDNLEEEDYENLLVGFYGGTFPEGKEMSKSEIVSNFRPYWDYYYTKMILPISSMGLEELEYMAIVWLAFFDNGYSNISDNCLEMCRDIQKVILKELRNYQIDRNFHENRFFVALEALQIIERGEKKFMEEMLVCEMNHIRIHDDFRKIIREPKL	342				osc	0.63	347.98	8							P						3.50877		1	58	56	342	0.584795	16.3743	16.9591		0.094		-26.231		25.5785	25.6988	24.4436	50.4888	27.0376	54.6966
17199	17209	WBGene00007200	vamp-8			B0513.9	Q95QZ1, Q2EEN5	Q95QZ1	MMSMENDSNKPSDNDQQKEKMQNLRNQVDSVKAVMVDNVERILERGERLDNIERRSEQLNATSANFKFTARKVQRKFCMLNAKWTVILSIVILIVFVVLLLLILHWTGVIGKRNND	116				osc	1.45	317.68	8							P						16.3793		1	65	40	116	21.5517	34.4828	56.0345		0.0118		-21.329		44.7875	43.4169	26.2442	68.3911	62.5817	68.4107
859	926	WBGene00007203	best-1			B0564.3	Q17528	Q17528	MTINYHKEIMTSHPWTFFLLLFKWKGSIWKAVYMETIIFLICYGIISVIYKTAMGESSQRTFESLVRYFDKRLSYIPLEFVLGFFVTTVVNRWTKLYQTIGFIDNVGLMANCYIRGATEKARIYRRNIMRYCELVQILVFRDMSMRTRRRFPTMETVVAAGFMNKHELELYNSYDTKYNSKLGTKYWIPANWALCMTYKARKDGYIESDYFKAQMEGEIRTWRTNIEWVCNYDWVPLPLMYPQLVCLAVNLYFLVSIIARQLVIEKHKMVDEVDVYFPVMTFLQFIFYMGWLKVIDVMLNPFGEDDDDFETNALIDRNITMGLMIADNPMSTPELRKDPFYDEVDVPLLYSEESSNIPNHHYHGSVSEVRLEQKGNAPVMMMPHSQSAANLRRMMSFKS…	450				osc	0.96	357.26	8		2.01401	3.79117	0.000233896	0		P						0		1	97	79	450	4	17.5556	21.5556		0.007		-14.033		10.4348	28.0619	1.11521	23.4463	13.1491	39.3196
2120	2186	WBGene00007816	C30F2.2			C30F2.2	Q18328	Q18328	MLPNVDFSRCPTCLEDYDDNSHRPCVGFCGHSICLKCQSKIVSCPLCKRKNAFFGTVINYQLLDSCLAIRQLLNEPMSPVPGAKSPVRGRATSQKRATETPNISQQVVNATRRSRRTALETAVDKTQQREIENNWISQHIPAPESRRRDRSLRRLSERIVGSDHIPAVCYRTIYTLPPPENFAAQGVPSAFNRMFFGRSCFEI	203				osc	0.63	326.42	8		2.30393	1.9262	0	0		P						7.38916		1	87	82	203	2.46305	40.3941	42.8571		0.1242		-13.416		65.5097	49.9312	38.3616	79.9165	38.6441	75.2665
13440	13467	WBGene00008334	sdz-8			C55A6.5	P90780	P90780	MSPGSVVVTGANRGIGLGLVQQLVKDKNIRHIIATARDVEKATELKSIKDSRVHVLPLTVTCDKSLDTFVSKVGEIVGSDGLSLLINNAGVLLSYGTNTEPNRAVIAEQLDVNTTSVVLLTQKLLPLLKNAASKESGDQLSVSRAAVITISSGLGSITDNTSGSAQFPVLAYRMSKAAINMFGRTLAVDLKDDNVLVVNFCPGWVQTNLGGKNAALTVEQSTAELISSFNKLDNSHNGRFFMRNLKPYEF	250				osc	1.3	359.94	8							P						8.8		0	5	0	250	2	0	2		0.0227		-16.067		34.1464	40.1646	31.1815	50.4888	54.7015	30.8622
5687	5748	WBGene00008985	F20G2.1			F20G2.1	Q93544	Q93544	MAPKSILITGANRGIGLGLLKQFIKNKDVQIIIGTCRDPSNATELNSIKDTRVHILQLDIDCDDSIRKLGAEVEKLVGEDGLTVLINNAGIFVPYDIDGEKSRSTLIRQLETNTISTVLITQELLPLLKRAAAKNRGEGYSINRSAIINISSTAGSITKIDASYNIPLVAYRMSKSALNSFGKSCSVDLAKYHILVTTFCPGWVKTDMGGANGKLEIDDATKTLSDNILILGDAHHGAYLNADLTVIPN	249				osc	1.24	337.69	8							P						4.81928		0	0	0	249	0	0	0		0.0644		-17.674		19.6856	18.3837	14.4461	46.2073	46.2786	32.9108
6969	7030	WBGene00009865	F49B2.6			F49B2.6	G5EGH4	G5EGH4	MLYEEGETHDGLSKCLFSTIWTPSNPYRHTSSHRRTRVCVAITFGLLMFGLGVSVGAFLHAVMFPDGSPSILSLPSFLKSDAPMDADNSTLINLRIAGAELGSSVELEDTTVGSEEEEMVEEGDEEEDEVEEKSEESEEEEEKIKKKRRGKKEKKEKVVEEVEEEEEHEETEEQEEEQSGEKFVKANKECTNITWYSSRLPRTAEPIDYDLTLHPNLTNGEVEASVSIRILIKNDTKLLILNAENLEMKSFDITKKGAKVKADFVKCAVMTQWAWKLAKRLHKGDHIVLTIYYSAQMKSDLQGLYFSTHLGTDGKKTKSAATQFEPTFARKMLPCFDEPNFKATFQVAIIRNPHHIARSNMNILISKEYKNGLIKDVFEKSVKMSTYLLAVAVLDGYGY…	1082				osc	1.09	332.81	8							P						9.79667		1	118	81	1082	3.41959	7.48614	10.9057		0.0493		-18.543		4.31344	72.5473	41.6581	3.59617	5.26161	6.25645
7424	7485	WBGene00010148	F56D5.3			F56D5.3	Q20883	Q20883	MKRFPHAATVSSKVLGGKLNFPNGITAQNRFMKAAMTERLATYSLDDFKNHGLPTEQILNIYDKWGHGQFGMIITGNVCVDPINLEAAGNAIIFKEGESSKRRNLFSQWAQKIKQDGSLAIMQLSHAGRQASVFVNPTPYGVSDIELKTDPPGSMYGKPIALTTDQIKTEVVDRFVYAAKFAYECGFDGVQLHGAHGYLLTQFTSPTTNNRNDKYGGSIENRNRVIIEIYDEIRKEIPETSGFLIGIKTNSKEFQDKGTTVEDAKQMCIEYEKRGFDFVELTGGTAEKFVFAHQRESTVIREAFFVEFAETIRPVFKNTVVYLTGGFRTTGAMVDAITRNTTQGIGLGRPATAEPDLPKKLLNGDVPSAVKDEFNPNDMIKQIMASGSQIEQMARNSVE…	449				osc	1.12	332.89	8							P						0		0	12	0	449	2.67261	0	2.67261		0.079		-15.768		24.8023	52.8519	7.33972	20.8499	57.1088	23.9204
11975	12019	WBGene00010403	otpl-8			H19J13.1	G5EDX5	G5EDX5	MLMVDEQLKIGATPMYSPSHNPIVIADDMEKGGSDSDSLPSSPTHHHELYRRPWIHEPRATNFFVRLITSLYALILTIISLVVEVSPTWRTDMWLAETIFYISMYGVGILFFAYCYIFIIYPGPYNQLISVLRKYKIIKNSEVWFIMQSQHNGEGAGTLYLRLGALFFGSVGIVLFGLELFLCIENVACKKVAIAKMIVAIVFTFIQMHFIFCNSKITVNSSRKIVAFGMMHLISVNLWTWFRFVLAKQEAKAHKKAQLKQTFRKYYSSSSSSSSEEIHELISAVLNSTLNNTPATKTMEPVASRLFALEHFGDVATFLTTCIVEYSLIGAAIMFILWKSIGQNNHQQSNSGKRKVKMRIDCSSSSTGLFAGIIFLIGSLVSMGMYTIFESLRNSSGAQ…	619				osc	0.86	353.42	8		2.25575	2.42948	0.0163801	0.00188099		P						8.5622		2	121	94	619	4.36187	15.1858	19.5477		0.0718		-10.481		1.95529	1.15942	8.91427	3.22034	5.38934	6.92459
19601	19608	WBGene00013853	ZC116.1			ZC116.1	B5U8M5	B5U8M5	MDGIKEKHTIVEFFRSFFRNATDDDSIGLDTPIEIRYKNDQTKNLHHFCSLQSNEMNTLLALCSLLAVASAQYLYYPTSYYTPYYYYYPTAAVAGTTGVAQQTQAGGASQQAYAQQQPQQNQQYAQGTQQQQQQYYPQQTQQGQQQQTLQYQQGVQQQPVQYDQSGNTQQVQYDQSSQMQQQPQQQQQYTPQYDQSGNTQNHQQGTQQTGAVAAQPPYYYYTSPYYYYAYGRK	233				osc	2.49	327.76	8							P						71.6738		1	120	115	233	2.14592	49.3562	51.5021		0.9776		46.348		67.1629	74.591	31.1815	30.8057	97.8801	47.8482
7679	7740	WBGene00015047	faah-1			B0218.1	Q17449	Q17449	MIFYLVLLVLGAIAFYVHFSNNRKKLIERLEIVAQRRRDDLSKNVEQARKAADKLDTQRRDWIGSLDFEQLRDELQRGHVTCVEAIRAYFHKAILAHEKTNAVTCFILDAERQAEELDEQAKLPYYVKPPLFGVPLSLKECLKVKGYDTTRGFVQDAYHPATEDSIQVEHYKKLGLIPFCQTNVPQSLLSYNCSNPLFGTTTNPYDSTRTCGGSSGGEGALIGAGGSLIGIGTDVGGSVRIPCHFTGTAGIKPSKMRFAHRGGGASVPGKPLIDANDGPMAKDVKTNVEFLRNVWGDIDFQSDRDPYCPPVHWNESVYSSEKKLRVGYYIDDGWFTPTPALQRAVLESKKHLEAAGHTVIPFYPPRLPSVMQLYFRAVCLDGGQYVLNKLLKDIIEPTI…	572				osc	0.87	347.68	8							P						3.67133		0	18	0	572	3.14685	0	3.14685		0.0085		-9.15		17.3962	46.9909	28.2682	37.1064	36.7109	24.2741
4349	4411	WBGene00016063	delm-2			C24G7.1	P91103	P91103	MIPTISKPKTNQSTKSARKSSNESPYPSVTFRPNSSLSHLIIEVPVAQLKKFKHAGETVSVERETQHFCETTTMHGPKRIFQGKRWATLFWLIMVCTSIGLLITQVCILASNYLSKPVVSDVSFLINEEGIQFPQITICNFTPIRKTFVNEMNKTGQISPNMINYIMHWFTEVPILIGSSNWQLLHEGNKDLQEYQKNNPNFTVQGFFIDAGFSCSDIFKLCSFQGETFDCCSISTPVLTPLGKCYTLDLLSSTKPSMHKQTEPGIQAGLAITLDAHLEEQFDGSNGMDALFTNSFVNGFQYFVHPPNTIPHLSSDEFTVTPNSVAYTAISSERFELLPTNKWGNCTEHYPSGIKSDLPYLTGNCVSLCKAKFFMENCGCTPAVYNNERNLKECTPFET…	608				osc	0.87	337.38	8							P						0		2	125	116	608	1.48026	19.0789	20.5592		0.8627		-0.197		32.3803	48.9266	37.5289	23.4463	25.5859	33.8909
2840	2906	WBGene00016898	C53C9.2			C53C9.2	Q09936	Q09936	MGEEDWSDTQQQPRKRWTLEQLKGGNTFLSQQAGTNKFETQKGMTAVGMPRWNITKDKKQGYIAPDQRSENVLRVQCGTNQYASQKGETPIGASRFQVPKVTYKKEWETILDKEGEKIIPKQAGDYGLASQAGEVSMGGHRNQVALIRGRLPHDRRTHGVLCFQNGTNLFASQTGMSAPPGLGAVRQATQKIEGLELGEDILRRGTEFTPWYSGQNKFATQAGSGGFLKVRDVLPHTVGGKDIEEELKQKSEGIVPLQSGTNKLASQRGMTGFGTPRNTQLRAGWKKEWIEDYEAALKEWEETKPPGSASSVDPFGHYKKKFEERESSRQSEIDSQSVKASEPVEPEPEEEEEEEEEEKIEEPAAKEEEEEEEEEEEEEEEELEEEEEEEEEEEEDE	397				osc	0.65	323.81	8		1.90805	1.97933	0.0366459	0.0035512		P						14.1058		3	258	193	397	16.3728	48.6146	64.9874		0.6291		-5.891		89.2778	78.9167	75.2935	65.9224	92.4638	78.3616
5055	5117	WBGene00017194	F07C3.3			F07C3.3	Q19148	Q19148	MITWFRNVKRKTQPMRFVMILFAFVAAFLFTANIRSANQFALPAQILNRASRLQSQKTEESAIDKLWNINVFGDDDNIKTEIERDPLLTHHPFDNTCKFPLPNSYAEDIIPFHLSERMRQLKCEVKQKDYATMDSEGYIYVHPHFVDWPRLERDVQCKVDIIEGGLRKPERNMTKNSMFIKKTLEIPSNERLFVNADAFVINCYNHSKKAVKPEVPIWKKPFPGMKDKNLPEDEILRVKDLYSYGDYGNKIREQVSKAVDRYSIDILGFDSTARTMFMRHMPRTVEVMAKLDYHYLYGYTKVADNSMVNLAPILVGDMEEALKKPKYDKSGDFNINWLLPTEDKMDPTKLNFLWKIMKEKYGCESLFNEDISTKGLGLFNYPPTEFQPGFTENPADHYY…	746				osc	0.74	322.34	8							P						1.60858		1	67	37	746	4.02145	4.95979	8.98123		0.1183		-16.962		12.1371	77.6713	8.51388	14.3012	6.25154	40.5183
6574	6635	WBGene00018274	F41C3.8			F41C3.8	Q27GU4, Q20259	Q27GU4	MGAFGEMRHTPSPGTQKLRVDMSSSGSTPVSKVETPILPSSSMSQHPPNNPFPRGSQSYNSSGSTPLRVNTSNRSSANSQRPLLPPQDRPVRFQTNGHLQPSVYMPTTHSQADSSESRRKHDKLSDVYSQSGDTVEFAKNLSDYINEKIPYQISIAVLSCFSLLAFLLIIFGLLNAPFCAIQPMIPIWLIVEGVLFIISATFRIYFLIPTPRRTAYRRQQRQLGASLLCKGLEILFALANIVWLILGCVWVYGSKAFVHFNEGMFERHYCDPTIYWSAFFACTAFLIFYCVIIFLVICLLIVGSVKESSSQDQNLD	316				osc	0.61	334.3	8		1.63865	3.21537	0.00101847	0		P						9.49367		1	176	128	316	15.1899	40.5063	55.6962		0.2688		9.585		32.562	37.8728	21.5328	50.4888	31.9725	61.3142
10663	10721	WBGene00018538	marg-1			F47B7.7	H2KZY6, C6KRG1	H2KZY6	MAPPTTIPNLFMSDFGLNTDDIKYFHMDSHIQGRGPNRLKHLDIEGRWVLSGKSIPFISAAFNHLERLNDAQVPLRDITEEPIDAIGMVGWTKSSAPAEEAPKEEKKIPKKFVLQPPVFVEDEVPPSPREVVPHRSAGYGPAHHKRKLSIPDRSRSVSPMPAEAPGQTVFDKYAKYERHRKDSITRYGTKWGDAGYVSHSPSPTGDEPQAIPHRTQALSPRPASRTRQYDSEYSADFLKNDSAGSVNELKVLTKNIKGDYVPYRTTGYGAYHVKRQYDLSPRSMGSDYATSSGSEQSSPIPARRERSADEIVLSAYHASKTTDSSRPRRDNWIRQQ	336				osc	2.18	324.05	8							P						5.65476		2	266	235	336	9.22619	69.9405	79.1667		0.6524		-13.055		80.565	78.9167	53.6649	65.9224	48.703	83.014
7109	7170	WBGene00018730	F53A9.7			F53A9.7	Q20692	Q20692	MSYHGNGGYNAPYGGHGGYAPPPVHGAPGYMPPTVVHTDGGHHGHVDTHHHEESHHGEHHGGHHGVQHYESHHESHHHGGHHGHH	85				osc	0.69	326.99	8							P						89.4118		1	85	85	85	0	100	100		0.9938		-3.821		76.082	16.8632	28.2682	93.9818	94.2127	92.9821
9536	9595	WBGene00019361	K03E5.2			K03E5.2	Q2MGE5, H2KZW0, O61848, H2KZW1	O61848	MTSPVPPTHQEAGLKIAAVEVPSNEQLERRTRDGKWTLRQLRQTDAMVPLQSGTNQFDSQRGKTGFGMPRNTQTKVDFADHDKQWLIEEQKQYSDAIVRLQSGTNQFESQKGKTGFGMPRNTQTKVEFAEHGARWAVADNAAHDSIVRLQSGTNQYESQKGMTGFGTPRDVKGKHLKRIWELEFPEEAADFQQQPVNAQPQN	202				osc	0.57	333.96	8							P						0		3	131	122	202	4.45545	60.396	64.8515		0.0143		-11.192		73.9155	62.169	35.7013	79.0494	84.6794	79.0862
11889	11933	WBGene00020977	oac-52			W03B1.8	O45884	O45884	MIDLVKQKPSKRLDLQGIRGLAITVVLGFHFYPEAFPNGYLGVDQFFVLSGFLMCMLLKRSENKPTCSLVTTFYFKRFKRILPLYLLIILISMICLYNFFPDTAVETNQESANHALLFVSNRPKTDQEDYFQQLSIAIDIFTHTWSLSVEIQFYFLVPFIFIISTYFSEILQYGYFCVIAITSLVYFNVIFSTEAFNSVLARIWQFMIGMMVYLFSKSEENYQVLNNNEDEEVGECKKLLMDAESDQEVEYNPGDKIVEFAQKTSYILLTGLLLMTGFPLVLPPIFARPLVTIGTGCLMTISKDNTFLSNRVLTYIGDISYALYLIHWPIYAYWKLSCDGNQYLLVCALVSSFFLAVLVFETFEKWYLKLSSTSVGILVVALFFQNIVLINKDLIMDNF…	686				osc	0.82	336.04	8							P						2.33236		0	11	0	686	1.6035	0	1.6035		0.012		-13.814		1.48612	4.47556	0.393024	5.50725	5.26161	15.016
17590	17597	WBGene00021127	W10C8.4			W10C8.4	H2L0N6, A0A0K3AWN2, A0A0K3AUA9, O45010	O45010	MSAPTKLELISLPGRGRAETIRLLLVFTHRKFTDTRLTLAQWKAKRKMAGFNDDTKLPVMKINDTRTIIGVIDICRHIALQYGLYGSSSGDQEEVDKVIQKLEELNTAMNPILRATLTKNYDARKECWNVFKEESLFPLLREYEELLGEQKFMIGDRYSWADIAVVEFLTRCQQCYDSFYLAHFERLRTFCQTFESLPHIRPYIQGRVDSFI	212				osc	1.27	318.68	8							P						0		0	7	0	212	3.30189	0	3.30189		0.003		-28.909		22.0118	21.0685	10.4274	47.2366	37.6345	65.1363
20128	20135	WBGene00022814	ZK742.4			ZK742.4	Q23091	Q23091	MPHQRLVADCVDIKPLTEHIHFRNGRVALNRLMKSPMSEKIYNWEDPNETKRGVPNSGLVHLYEKWGFGGFGIVFTGNLVIDPRHPYEAGQGIVSKENDTPVMRDWYAKMARAMKANHALAIAQLNHPGAWAFTEYTDGSGKKHIISDGALDILNAPKSVVKSELIDRVVYAAKLLSNCGFDGIEINTAFGNLFCQFLLNNNKRTDEYGGAVLVTRTQFHIDLYNAIRREVPAASGFLIGLKLNSADYQNTFTNDEVGRLCEIFDETGYDFVELTGGQMEQCVEEAQQRASTIARENYFLQFIETAARSMRKTVVYITGGWQTASAMVNAVKLNVTQGIGFARAAAGEPDLPRKLLSGVAHSTLDNKFSPADYFTSKHAAHFQMKTMAARSINDVVRST…	445				osc	0.8	331.72	8							P						0		0	13	0	445	2.92135	0	2.92135		0.0064		-14.987		17.0843	53.8369	6.95407	27.0572	58.3296	20.0516
17592	17599	WBGene00044433	W10C8.6			W10C8.6	Q4W4Z6	Q4W4Z6	MTVVNVDTKTGYIETDNDRLIMVILLIFLPPLAVFFKSRGCTSQVCLNILLYIFLIIPAYCHATWYCFIRGREHEVRAELSRRI	84				osc	1.72	319.91	8							P						0		0	25	0	84	29.7619	0	29.7619		0.0053		-35.738		24.4682	11.1078	5.52198	55.2788	52.2034	69.2459
10021	10080	WBGene00002195	kin-9			F08F1.1	H2KZN3, F3NWW5, H2KZN4	H2KZN4	MPEENEPWWRPTTPLYYDPYYGGDKHSSEGGVNAVALGLGIGIPLGIIAFGLALFIFFWCRKRRRQNKNQFPLPFPKKVNDYETQLDSPAYSIHDPWLLDRNNLEINYSKKLGSGAFCNVFKGKINGEAPVSQIHPGQRTQLLRDCPVAVKMLPSFADDAARSDFMQEINFMKSLAYHPHLVSMLGFVADRKSPYLLVEFCEHGDLLHMIRNRRQEIINGPTENPDGLKIKDLLMFSWQISNGLEYLNNIGCIHRDIAARNVLVDSANTCKIGDFGLCRLTDSLLYTARGGRLPLKWMAPESLATYEYSYKSDVWSYGVLLWELFSLGEVPYGEVQTTELLQTHRSGKRLLKPEWCPEEIYDVMRLCWQELPDDRPAFQQTCAVLAQMLENATENYGYL…	418				osc	0.84	298.06	7		2.08892	1.79386	0.00152975	0.00147676		P						11.1111		2	269	256	585	2.22222	43.7607	45.9829		0.0232		-19.02		27.7278	35.5072	28.2682	60.1793	30.2235	65.1363
10115	10173	WBGene00002270	lec-7			R07B1.2	Q09605	Q09605	MYVIENPKVPSVYQIEENLKAGVEIEVNGAVLHGNDRDFAIELLSGTNIVLHVKFEFNGEHSIVLNSLINGEWGPQLRHSHFLKRHDPFHVRIYVHEGYYNITVNSDLLVEFDHRFPVVAVQGIGIKGSVDIESIVFKGYEFKTEWKKRHAIVNEAVCEAYDTVTNAPSVVQIEGTQHY	179				osc	0.74	307.3	7		7.66032	6.43965	0	0		P						0		0	0	0	179	0	0	0		0.0043		-24.699		27.7278	12.2402	4.07517	51.663	38.6441	58.2756
11929	11973	WBGene00003861	oig-3			Y50E8A.3	Q9NAF4	Q9NAF4	MSYSPPQPPQRQYSSTLNVDCVDGVYRSQQQVSPLTKQVNHLAYEIPKNKYANNPWNYAPEFLKVFGDLRVHIGGKAVFDCVLLGSPRPRVCWLFNEDKLRFSDVIIEDTADVCRLTIPYVQMHHFGTFTVLCENEVGRATAQAELLPLYE	151				osc	1.55	308.62	7							P						9.27152		0	9	0	151	5.96026	0	5.96026		0.0039		-1.222		36.4112	25.6988	8.11594	74.65	58.3296	76.8558
12150	3	WBGene00004008	pgp-14			F22E10.3	G5EG61	G5EG61	MAPKDDPDNRGFDDQRRPSQRSTVLAIPALAVNDPKSDPKIASDLPANYVDDDDDAPKMYTPSLLEKILNYALCRGDIANQQLEAQPVSIPGLFRYGKKFDYLLLFIGTICAIISGVSQPILALVSGRVTNALLVYPPTSKQFRNKANENVYIFLGIGIFISITNFIQYMCFQHCCTRVMAQMRHRFVYSVLRQNAGWFDKNHSGTITTKLNDSMERIREGIGDKLGVLLRGFAMLIAAIVVAYIYEWRLASMMLGVAPTCCICMSLLARQMTSTTIKELIGVGKAGSIAEESLMGVRTVQAFNGQEEMVGRYEAELEKGRKFAVWKGFWSGFFGGLFFFWLFSFLGCGMLYGAYLLKVGIITTPGDVFIVVMSMLLGAYFLGLISPHMMVLLNARVSA…	1327				osc	2.72	288.38	7		9.64657	4.57347	0.000139134	9.17865e-06		P						7.08365		2	164	160	1327	0.301432	12.0573	12.3587		0.5483		-10.694		1.13486	12.2402	6.95407	2.07074	8.70793	1.68018
16449	16467	WBGene00006388	taf-7.1			F54F7.1	Q20788	Q20788	MSFDQPISVNLKVAKQHEDNEEWEEHLILRVPPDVVNRMEKAVNGEIDAEELGINFQEDNRTVQIRLGNQILPAKILDLPTINEVHKTLDNSTLYKVTDVSQMIICEGAMPIPKAERKKLNPEGIENREPKIEVEGSGVENKTNVQSKTARQLAKEKVKEYHYPHGITPPMKNAKKRRFRKKKEKKTMAVEEIEIELKRLLRSDLEAQSVRWKVVDDDETNPEDEDIEVYDNDDGSDLDKDDKDLFLSDDEDTL	254				osc	0.89	277.43	7		7.74126	1.91263	0	0		P						16.9291		2	105	76	254	11.4173	29.9213	41.3386		0.4667		-27.314		60.732	60.0197	43.1516	56.5291	41.8718	71.7612
16784	16796	WBGene00006641	tsp-15			F53B6.1	Q9XVM9	Q9XVM9	MGALGDSAYGARGRLIKFSYIVTALISILFSISCICYGIWLLARRSQYAELVSPSLYVDVGRILVIISILSILNYLICFYAIFKEMRCFVTSCAVASIVIAVMLIIGGCIGLNFRDQLTHYTPLNLKMLTSLRELYGTHDMKGITESWDALQSNFKCCGVNGTDNAQIWKTSKWYMHQRAPKLLIPESCCIPSEIERCRSNPFDQDAPPPYYTSTCYEPLQNDLLHVMNVASWLCITNAIVQIIPSVAGCWYSKLIRK	258				osc	0.78	309.55	7		3.00165	2.38232	0.000233896	0		P						10.4651		0	17	0	258	6.58915	0	6.58915		0.048		-23.519		11.5672	7.04741	4.51486	36.2024	28.5876	37.6738
1919	1986	WBGene00007717	C25D7.5			C25D7.5	O17598	O17598	MRRNLLYNFYITFYILLSISSFFVECCDKGLTQLRHKDTLQLMRCVPTLPGHPDPCILQTGGQMSFCQPDGSQDYVCCGTPELLVRLVGNQNKQSYPENWNFYPRQSHYDYSVYIRSSKEQLESDAAFKNQVILTTPKTTTTTVTTTRKRQPVKKSNVVLQMLTIPSLSRGNYSNSLKLHTNSVLVRDGACVFVVDTGLPSQKKQISKNLASYGAPAKKIKFVVVTSSQPQFSGNLNLFPFSQFIMADATMYKDNIVFMKRFEKHSILELCSPNSLIQSTPGPTPNSITVIIRNVDLMGTIAIAGALFPNGNDLNVFDRNSVYDIDKLIESRNQVICEVDWIVPASSSPFRVTQLHRTNANC	362				osc	1.31	277.83	7							P						5.8011		0	28	0	362	7.73481	0	7.73481		0.019		-7.008		38.4083	48.9266	48.0496	52.9452	20.8401	45.4729
5664	13	WBGene00008969	F20C5.4			F20C5.4	Q19635	Q19635	MPDDIPKLPRHRGKKNQPKDTPWKQQKLPALRPHYNITSAIPVTLITGVATLAMGIALYFGHNGSLEQEIVYTDCALSNGTQASRIMRTEMGNQTFKCAYTITLNDDYTGEVKFYYGLSKFYQNNRLYFNSRNDQQLRGKVTETDGCDPLEYVDVNGTKVPIAPCGKVADSMFNDTFELFYINDKASNAVTRVPWTTRGVLGATEMKRKFRNPIRAENQTLCDVFAGTMPPPSWRYPICQLGLNSIDPDVGIGFENIDFMVWMKVAALPKFRKLYRILNRQVDMFSNGLPKGQYQLTINYNYPVDMYSGDKYFVIANENWVGPRNLFLPVIYLVVGTFLLLVTILFILIWLKQRLSRVHPT	361				osc	0.79	313.36	7		1.6387	2.62854	0.000364811	0		P						5.26316		0	28	0	361	7.75623	0	7.75623		0.006		-7.107		25.9519	34.2913	8.91427	43.2302	26.2712	63.5004
8103	8164	WBGene00009090	fipr-3			F23D12.6	Q8I4K7	Q8I4K7	MLKVDWYKSEFIFTVGKNFHILLQLNFIMNAKFLLCVLALVMCSIVQDASAQYYGYASSYYPSYYGGYGYGAYGAYGGYGLGSAYAGYYGKREAGFGPVQN	101				osc	3.14	297.83	7							P						41.5842		0	14	0	101	13.8614	0	13.8614		0.478		7.674		45.7431	16.2122	9.35888	87.9268	95.4409	62.7733
5847	5908	WBGene00009093	F23H12.3			F23H12.3	A8WHR9, Q19762	Q19762	MRNNNENEENGNNFLMVPVSRPLHLDTTSLPSRPSSPYQMDHSPALSQKIKVPQKQYSSQEDPLRRMATPVFDKHEQENRKKGPSSAATVLALSGLFVVGTTLILSGIIVLIVQQEPPFVVTGCLFLGIGVAMLLVCVALQRKNLVKFVLDINRDLYFLNMSKSYMFKSMFEINTELPLSHAD	183				osc	0.57	277.32	7		2.25744	2.03112	0.000139134	0		P						6.01093		1	77	68	165	5.45455	41.2121	46.6667		0.0207		-5.51		57.4969	44.6156	42.3876	67.1408	59.7028	82.2574
17888	17895	WBGene00012444	Y15E3A.5			Y15E3A.5	Q8MPS4	Q8MPS4	MLTDYYRNNMQQMDQNSSLNRHSDNGYGHGSYGSFSNDNRVPLDRPLFINTSMSAQQRVDIYRQLSDPPKDSEPALAFNFRSY	83				osc	1.34	304.46	7							P						0		1	39	39	83	0	46.988	46.988		0.2511		6.713		66.4382	54.7949	20.6436	90.7394	86.5831	88.9364
19173	19180	WBGene00013448	Y66D12A.24			Y66D12A.24	Q95PZ5	Q95PZ5	MGKDYNYGGGYRPYGYSPAPAAPSMEITINQNQSSASLPARYGNSSSGSSLPRRCAPPSAPPPPPPEYCVPDQPGFNPMWFDRFPRRENRGMFRLCLVELMLAVVILGGGIWCYRDTSDYCPYYSAIWTSAIYIINAIVGSAAAKMGALNLYMAHLTLSLVSVMMCLISGGLSARNWALVGTYHHPRIDRDEAFCLLGTHDTSRISYIFSHMDKYDFAKCLWQLKVGVAVNSVQFVIAAIEVFLNILSAILCMKRTCTSCF	261				osc	0.62	304.31	7							P						13.7931		1	78	78	261	0	29.8851	29.8851		0.1808		6.133		31.604	37.8728	8.91427	79.9165	59.7028	54.0604
19732	19739	WBGene00013902	ZC455.1			ZC455.1	G3MU23, G5EGE1, G5EEA0, G5EGE4, G5EEL6, B2D6M8	G5EEL6	MVVFRWSATPIKMVGSQDSWGTPPHYRSSLNSNYRDSPANSRNTSARSRLSVSSAQSPHCFLPTTRDSSPRSIPSPSLVPMRPDSSSDITINELHHSPLSHTGSTPEPTEIISKPTSKVPSRRASYSTGYPNHETFAPIRWVKETDVDDPLSIPTMSPIGSSGSSEANIGMISSRSAPMSKMPSVEKLDNRHSSIRGYNNRSCRRTVLSGLDRNANHSPNGIYVRRSRSKDDRPSLSYMSFNGMDQQNVSPPRTASIPIFMSQESVSMQSPMNSPVNHSMSHVARNDRSQSNHNLSGEELYKRFQQISLSHVQTLNIVADKLSEDARRGDEPVSRNRLSQLDFASFIITSPHPILTKGKSLFYNAVLPRQSLPDYPVTLMIAPCSQYAPLMRKTESNHF…	665				osc	0.7	298.07	7		1.50196	1.42941	0.0194317	0.0135034		P						11.9639		1	463	460	828	0.362319	55.5556	55.9179		0.9712		7.209		82.2451	87.5903	78.617	73.4169	24.1268	37.6738
20140	46	WBGene00014077	ZK792.4			ZK792.4	Q23595	Q23595	MSSERSGPNGSLEDNGDYLPLEVIGEENSLDENHVCEDVIMSITNKHVQCLARFSNNDLLAKDTIGQNALHMAARVGNLNILKYLLDRLPELRDIQSTNGETAAHISAAHGDMRALEILLGGSLKSTMNCAMTRDVNGTSILMAATARGDTDMSIWLLRKFGKALALLDNNCKMLPVHVAAAQGNIEFLRAAIKFDNQMVNARDEFGCTPCVYAVQGGCLGTVRFLVEKARSEMGSVSNRGQSLLHIACLCGHEHIVRWILNRSGSDAILWTTNDRANAIHCAAYSGSVPVLSHLLNAFSKKKRHYVMTLRDTRGNTPLHLAAMNNHLDAALYMLENGADPALINANGHSPQSIAALRHHREMERLVAAYQGKRRKSKSKKKSQSMHDLSQFASPNPNG…	510				osc	1.4	289.35	7		4.83067	3.94353	0.000489003	2.39607e-05		P						4.5098		0	21	0	510	4.11765	0	4.11765		0.0647		-4.808		25.5785	70.2555	14.4461	44.1562	75.0725	14.4952
1244	1311	WBGene00015517	C06A8.8			C06A8.8	A0A3B1DQR1, A0A3B1DZV2, A0A3B1E4S1, A0A3B1E606, Q17691, A0A3B1E3L0, A0A3B1DVH8, Q8IG54	Q17691	MPLPFSIISTTSQDVLEDADSDEEAETFYVNWITEKNHSFPQSMVLELEEESLVSSVKLIVHKDYPPSSLTVSLGIPSNHFRNSRGKSYNADYSVRQELSFRDDFHVEYGQKHPKATVFFNSPAKFVRISVHGFSDSDVNHHRQVSILSVIISGAGEILPFDSHLKDEPKQTEMSYIELDKGILLPLKSKPKMRETKTIVGLYDTDSEDEEILFSKEMLNRLRKREAVMKNPQLPTTSAITETIAIDTSCEKSAPVSSSSSSKQQSSVSPPLSDRSKKQILDEILGIDEKGNKGKPRKEVYFGSRMSEFNNMLRLLERKREESIWEEKYAQASAIDESVKDLKSREAGLRELIIEREDALKGKDLIAAQRSKDRFDKNMSDALHLPTIRGFLNEHELKR…	403				osc	0.61	300.87	7							P						10.1737		1	60	51	83	10.8434	61.4458	72.2892		0.4832		-14.223		67.4748	73.434	69.7396	42.3409	37.6345	46.674
4540	4602	WBGene00015519	doxa-1			C06E1.3	P34298	P34298	MWWFGGNPSPSDYPNAAIPNFNMHAFVIFSVFLIPLIAYILILPGVRRKRVVTTVTYVLMLAVGGALIASLIYPCWASGSQMIYTQFRGHSNERILAKIGVEIGLQKVNVTLKFERLLSSNDVLPGSDMTELYYNEGFDISGISSMAEALHHGLENGLPYPMLSVLEYFSLNQDSFDWGRHYRVAGHYTHAAIWFAFACWCLSVVLMLFLPHNAYKSILATGISCLIACLVYLLLSPCELRIAFTGENFERVDLTATFSFCFYLIFAIGILCVLCGLGLGICEHWRIYTLSTFLDASLDEHVGPKWKKLPTGGPALQGVQIGAYGTNTTNSSRDKNDISSDKTAGSSGFQSRTSTCQSSASSASLRSQSSIETVHDEAELERTHVHFLQEPCSSSST	397				osc	1.25	271.74	7		3.31055	2.18398	0.000111414	0		P						15.1134		1	94	91	397	0.755668	22.9219	23.6776		0.3875		-2.565		15.8708	10.7713	11.6581	34.6475	54.7015	27.1457
2883	2949	WBGene00016919	C54E4.4			C54E4.4	O44469	O44469	MPLDYQSEDGTTSSRNGIPNGALTVLIIAAIAIVCVVITLFCMLVNNRRNARTRQRTQQRQGQTVLRLSPASALSSPTGDTVRPASFPPMYIVSPSYDPKFDAPPSYEDAVRTMVQNGEPGLPNQTVITIPEHSQSTSSSSSLESGAARIDVEMTQHHHVPTTSGLTV	168				osc	2.07	299.44	7		2.8934	2.33863	0.00404417	0.00382143		P						35.7143		2	165	165	168	0	98.2143	98.2143		0.1845		-5.84		55.8143	50.8622	38.3616	69.6536	39.6782	58.2756
5182	5244	WBGene00017306	F09F9.1			F09F9.1	A5HU92	A5HU92	MNFEFMRTLHGFINFLQVLFGFAALFACSFIWRDTDLYFQFIYRGFGWQSVILAILFFTWIFALMVFLSNLFDKDVVGTIGKMKLLILYVICLACLIISASLESWYISRSGTTGKHPDHVYHPRFIAVTVFNWLLVVSYIVLILVTFFFV	150				osc	0.66	273.71	7							P						8		0	16	0	150	10.6667	0	10.6667		0.017		-29.147		10.8966	4.28887	1.00467	27.0572	31.1054	70.0639
16537	16	WBGene00019166	tat-2			H06H21.10	Q7YXV5, Q9TXV2, U4PBI0, U4PBV8, U4PEQ6, U4PRL1	U4PBV8	MFSWLPCCSSTSNEKNAPTERRLRANDREYNAQFKYADNVIKTSKYNIITFIPQNLFEQFQRIANFYFLVLMILQFIPQISSISWYSTAVPLVIVLAFSAIKDGYDDAQRHISDRNVNGRKSYVVRNGSLCEEDWSNVKVGDVIRMMSNQFVAADLLLLSTSEPYGVCFIETMELDGETNLKNRAAIACTQEMGDDLDGITRFDGEIICEPPNNKLDKFNGKLIWNNHEYGVNNDNILLRGCILKNTRWCYGVVVFAGKDTKLMMNSGKTKFKRTSLDRFLNILIVGIVLFLIAMCLICTILCAVWEYQTGRYFTIYLPWDDVVPSPEQRGGRQIALIAFLQFFSYIILLNTVVPISLYVSVEIIRFIHSLWINYDTQMYYENGEKSVPAKAHTTTLNE…	1314				osc	0.96	289.87	7		4.42351	3.07939	4.55129e-05	0		P						3.04414		1	214	169	1314	3.42466	12.8615	16.2861		0.1262		-5.895		0.717268	24.4461	0.523213	1.77352	1.62614	2.17391
16016	45	WBGene00020595	T20B5.2			T20B5.2	Q22600	Q22600	MDVRPYEGGRFEKIGSEEAHTIETFERRIHGTPHSEPQRQVSSKQYTERRTYGRDENGEIVVKIEKNPSEPVRPASPVRPVTPVGGENELSRHLLQPIQPLHIPRIDIQPANSSRHASPRHKLQYDEVSPRSGSINMLSPRSGHSASSRSGAGSRQSNVSVNSANVPLKKVTKKSRFVSIHDGRPVSPYTETVSFEVAIPFQPDRYSSASARSFSSSPHVSRRPSECAYLMENPLYQD	238				osc	1.18	288.08	7		3.8545	2.35772	0.00198519	0.00550387		P						16.8067		1	133	105	238	11.7647	44.1176	55.8824		0.332		-0.776		87.1629	66.4456	67.9686	91.4616	55.9445	86.4603
17516	4	WBGene00021075	W07E6.3			W07E6.3	Q9TYV2	Q9TYV2						osc	1.35	285.29	7		3.63176	3.44091	0.00193432	0.000278998		P								0	30	0	221	13.5747	0	13.5747
18658	18665	WBGene00021740	Y50D4B.1			Y50D4B.1	A0A0K3ARN9, A0A0K3AV71, A0A0K3AT27, O16286	A0A0K3ARN9	MAEWGYQNREKQIHEKVFDTLSRPLSRASKANSNGNQSSKESPSSSPFHMFSGGRKVKWNHFGKKYALRFSDYEMEYADLYDALLKKVHEVRADFEGDLAFIDQYGRQVIVSSDKDVREAIQQSKNKLKLHTTLRDGHVIAAADMAEAARGRPARSQSVPPERSYNMYPQRSPSSMDSAPDTYRHHPQQMTRAMSPPPMSTTTGSTHSPPLRQIGETVKTTYSHSGSYGGLYPGGYKGYPYGGGYSNSILYGMPPHNGMLWRFLANPFPFGNAQTRSFIGPNKYHHFGGYNHMYSSGFGGPVW	303				osc	1.13	280.79	7							P						21.6535		1	73	65	137	5.83942	47.4453	53.2847		0.2964		6.344		81.7072	71.6384	47.379	95.2076	94.6819	81.4419
19713	19720	WBGene00022609	ZC416.2			ZC416.2	H2KZH9	H2KZH9	MSNAPPPYTAQPQPYYGNANYAPQGSNPYPAQGPYPQGYYNPNQPQVIYVQQPAPRQQQRQSDDNCWLTSILALCCGCLIGEVCCDSPMLCCVIPCPIRLPRFR	104				osc	0.82	309.86	7							P						42.3077		0	46	0	104	44.2308	0	44.2308		0.2497		29.434		64.2054	34.2913	13.0115	92.3925	70.8843	83.7386
20064	20071	WBGene00022782	ZK622.4			ZK622.4	Q95PW6	Q95PW6	MKEPCFRCKRPTYFNDKMGPLKDGSMFHKGCFKCWICGTRLSLKTYHNNRNDNTDLEVYCAGHVPTPGPHDPIPHRSNLLFSPKTKGEYPHNLMRPAGPT	100				osc	1.24	308.62	7							P						0		1	43	35	100	8	35	43		0.106		-16.608		62.9305	36.6863	15.2395	87.4159	70.8843	96.1975
875	942	WBGene00022797	best-24			ZK688.2	P34672	P34672	MTINYNLAVSTSKPWTLFKLLLKWRGSIWKAVILELAVWLVLYGILSVIYRTALNPGQQRTFERIVQYCDSRLSYIPLNFMLGFFVTAVVNRWTYLYQIIGFIDNIGLMAAEYVRGRTEQARMYRRNIVRYCELAQVLVFRDISMRTRRRFPTLDTVVAAGFMMPHEKDRFDEIQYKYSKYWVPFQWAFSLTYEARKKGLIESDYYQVVVQDEIKKFRTGLAWICNYDWVPIPIMYPQLVCLAVHTYFLVCLLARQYVVSEHADNKTEIDLYFPIMSTLQFIFYMGWMKVAEAMLNPFGEDDDDFECNALIDRNITMVLMMVDQGYDRAPDLKRDDFWDEEVEPLYSEETAKIPNNPLKGSVSDVKLPEYVHEIKMVPHCDDASPLVPGDEMRRRRVSV…	632				osc	0.85	284.18	7		5.77382	1.92139	0	0.000405645		P						10.6013		1	291	285	632	0.949367	45.0949	46.0443		0.0169		-5.444		22.6087	66.9786	57.5633	11.7932	4.9128	37.6738
4278	4340	WBGene00000932	dao-6			T05G5.12	Q8MPY0	Q8MPY0	MWKKSQFTAYKKVESDEQDSEKQNTFNYQKLSESETMPVHQKTRKGSNHSNASTASTCSTTSSSKRYTSSQQSFAFVPPVFPVVPQKFVFFG	92				osc	2.25	227.16	6							P						46.7391		1	73	73	92	0	79.3478	79.3478		0.599		-6.416		70.5601	54.7949	33.7951	70.985	83.6527	88.9364
448	515	WBGene00003816	asns-1			F25G6.6	O16924	O16924	MCGIWAIIGEQVTPQQQDAFMKIVGRGPDLTVLEEVQPNVHLGFHRLAIVMPGDTPSAQPIVGGGLSVVCNGEIYNHQSLKIDCPFTLKNGGSDCAAIITSFIKHNKDLKEACASLDGVFAFIMADDKNVYIGRDPIGVRPLFYGYNSNGSLLIGSEVKCIEELCERVEYFPPGCCATISLFAPTRPVQPQQYYSVPTIADRFLSIDCTKTLVRDVLVKSVEKRLMGNRNFGFMLSGGLDSSLIASIATRFLKQKPIAFSVGFEDSPDLENAKKVADYLKIPHEVLVITPQQCIDIIPEVVFALETFDPLIIRCGIAHYLLCQHISKSSDVKVLLSGEGADELFGSYAYMQRAPNALHLHKEILRRMHHLHQYDVLRCDRSTSCHGLEIRVPFLDKRFI…	551				osc	1.97	235.4	6							P						2.90381		1	36	36	551	0	6.53358	6.53358		0.0047		-18.315		13.8639	12.6701	32.96	22.8101	8.95603	26.7453
14524	48	WBGene00005655	srr-4			K11D12.3	H2KYR4, O44618	H2KYR4	MKTDEVHQTEELVDGSIHKSEGIDLLGFLKYTTKLTGLDCTACAAAKNGNGSKICGFLARLFSIVVILSMLYRAITFLGEEGKLLTFNWSESNSFGFMGLHAFVCSLCVMGWTANARFPNHIKRLNEVRVLRVEPNEEIDDYSGFRKKAFFFSLPWLATLVSTALFNALQEKILFSGAVVPAYKYSLFPALAFIVWMTTSTCLAFYALFQFSMVRETEYFNKELQKASEDKKLKDPTVIADFSYRQRELLKLVNETNEFLQSYAKVAPLFCFFSIINAIFNLSFFSFVPVPYAIMLVFLLACIIGMIILSLLPAAKVQDQIVATSKILMESEDFENAENQKVYQTYRLMVDRSLKSETRIFVVNAFGINSNNLNIAMFVIPNLGPLLMMLEKLIDSNGY…	403				osc	0.66	268.41	6		1.74094	5.09099	0.00324239	0		P						0		0	27	0	403	6.69975	0	6.69975		0.0085		-17.182		8.5237	13.1147	2.43429	12.4048	39.6782	27.1457
10081	42	WBGene00006505	lagr-1			Y6B3B.10	Q9XWE9	Q9XWE9	MLGPEYNITHPSIYRTSTANPIVLAGLVFESIPHWFRRYARLRPDYSFPSSMISDFKKVSLSNSELYTVLILASIFTFLRYYLQIRLESWTQQHNIYPRFAHKVPESFWKLTYYGTVWIFAFYFHMCVDSHDIFNDPLSMWIEWESGGRPKMHWQVQVIYAVQSAFYIHSIYATLFMDLWRKDSWLMFVHHFIALGLLFLSYVDNFTLPGALVLFLHDNSDATLEITKLSFYLKKRTNRQYYKYYFLMGNAAFILFAIIWVIFRLYWYTCKLLYATIYGAVYLGPQDAPFFPLLGAMLLIIFAMNVYWFNFIARMIWRVALTGEDPEDNREWDTTAVSGLNQQKLDELATEKCHLKPKNV	360				osc	2.04	236.42	6		6.22022	5.45666	0.000139134	0		P						0		1	42	37	360	1.38889	10.2778	11.6667		0.0034		-21.135		4.5296	6.71334	0.0835176	16.6175	23.4586	45.4729
1109	1176	WBGene00007285	C04A11.1			C04A11.1	A0A3B1E041, O17567	O17567	MPETAADSSSDEHDWHDEKEDMLMMVMVVLLMLLSVVIWVAFCVAVRKTARKFIELKRQRRRQALLTAAINRAASTNEADRHNVLPIYITTLAHELNVFGAREEELPTYEEALSMSCTPSPNPVVTTSNRDRVPPYKPRSGKSGGRVLRIAPDRPGSIPTIVLPPSYESSVRHEAMLSPRIHSSPVPTSSNATAPSTSTSPPIYTISGNMHVTEC	215				osc	1.23	255.73	6		2.20078	2.19936	0.00546818	0.00089677		P						31.3131		3	176	125	215	23.7209	58.1395	81.8605		0.0832		-12.437		50.5871	60.0197	31.1815	58.9732	29.3712	62.7733
2291	2357	WBGene00007935	C34E11.2			C34E11.2	E0AHB1, E0AHB2, Q18454	E0AHB1	MHRAYDPGETIREKGLNAAARLNSRISHDSKREMENGVSRSSLVHGTQTNPNSDTWYDTDAFLLDQVKEVLNKLNEGSIDDEIWGKIVIMERCKRVAKAYLRKTTVIIDGSEDEFDGKTLGFNHFENPTRDDHTKEIRAKIADGVILKMDYQGNIKGMARGATPIVCQGWKEPRNNCISDRLVRLHGKLNHGAMEDEKAYKVFDMRKFKHSLERELHDGTPDARNLLLKTCMRVALVKDGADMNRTPCWFAIVNLVALDMIKEKIPLIKSLLNVYGLPSVTSPSPMSGPDNSGFNAQTLTQIIAAAVTQANKGTPTPTRNNNNNNQNLTISPEQLAQIASTISIAQTNTLRTADLVKKERPKKPYHCSTSSLDSSGEDSSGRRSEASTAIKSRAKRWEQ…	767				osc	1.36	226.18	6		9.98581	14.3804	0.000139134	0		P						13.0378		1	512	488	734	3.26975	66.485	69.7548		0.9114		7.603		80.0074	94.284	77.7549	44.1562	12.0216	28.8873
6476	6537	WBGene00009547	F38H4.3			F38H4.3	Q20178	Q20178	MTITDESTSRVADSTVPPDTSSPSLFQRICCCCNSDLKEPPVQLIRSGSLTYQQGDTPKPASDPTSSPPTNNVISAAKRSVDDDVEKPQTSQKPPQKPSEPDAESINMNDILMENVLKTTEEDRTEAVEEDNISISTNVIQEIDENELKKALKKSDEAPALKGRSGISKEMPSGSEDSDVEVEGDNRKMSVIEFIRSEAQAETSATISSPAPVKAAPVEGNGEEVENGFTKNEKMSEATQSEMSDSEDEERDEDSDVGKPISVVGMSSKTTARAERTPDAEERRIREFRELSSDESLKGTTEDEEEEIIVDEIPPPLPLSPPPNLYGQVAGSPIPPPRSPRRSLMYANADESDSDSDDEGSGDAHLVAVNALVRMHPVNFAPHREDDRQSVSSVSTASD…	452				osc	1.14	257.29	6		2.81573	2.03103	0.00131399	0.000575018		P						24.5575		1	443	406	452	8.18584	89.823	98.0088		0.9881		-12.9		86.4309	89.3662	78.617	61.3854	24.1268	56.8583
7627	7688	WBGene00010319	F59B10.3			F59B10.3	Q09951	Q09951	MSNSRWDGYQQATQAPGLNRQFDTQTNVLAADSFVRSGLVGQQVNTIDPSFYDCIYGVANSANTVIERCYKDIGCCADGCCKNGYWHNRYGWAVALIVIFCILVIVAFVIWLVVWLFNRSKDKQQKRELYEHYEENNYSGLPTPQPTPTHYPAEQYSYDPARDRDNYRY	169				osc	0.67	266.84	6		7.26726	23.6783	0.000204791	0		P						0		0	61	0	169	36.0947	0	36.0947		0.0748		-5.189		27.325	37.8728	3.10243	57.7598	54.7015	56.1066
9687	9746	WBGene00010643	K07G5.4			K07G5.4	Q21300	Q21300	MNRIRAALPWRKKNYYGDSDSTGYCSSSDVSKALSDSQFILRPNTALLSSSYSNGTNYYALDCTERSRLKEKGGTVTSRTSTVSSTTFKSHSMSTAADCDYEGEDESTTIRANSVRQVPMMPKLTSIKHLMTESSSEELPQHDEMEDDVATLEEVSMEYDDEDDDDVTLDIVPRREYRNSSFRSFPFSYQLMESEMDRLFDMMQVDEQIPSTSHCSSSPNSNSSHKKKLLIREPTSTIYYHDISSSEASPPPPRPSITRTESVPRSILKNSSSFAIYEEIYGDHLTPPPIDIRPQLPVRPIMAFQQFPPCTTFQPRLIQRLPSVRRRKKMPSLHHSTSFASYFRKRK	347				osc	0.69	263.66	6		1.43988	1.31887	0.011419	0.016975		P						21.0375		3	252	193	347	17.0029	55.6196	72.6225		0.7919		-11.831		81.2307	80.8671	71.8939	74.65	26.2712	88.3542
12668	12696	WBGene00011081	R07B1.9			R07B1.9	Q09609	Q09609	MSARSAYLCQIQICNGFLIAAGLLAVGLAGSQFSKVGLDNYRDIDFRLLNFIHVVTGCIGFYSLWRNHGSIVTKSLYLVSFVIGFATAVFYGFTTYRVVKAGENLNQLQSADGFNEEFQSENSNYAGRIVISALMIASGAVASLFSLFAIFLLSKIIVVTIPVYPLQSREQELAMSSAKKTLASIGLIKFILAFGILGLCVFIEYEHENVAGQDKYIKIGLDHISAMLCIVSGAMDIWATKGKNQQNLNLKVALAVAVVAATWCLKTVDNNAMPFYKNDLKFYYQGREVGDPSITSTDAPRYILVVAHGVLLGCFGIAFFLSTLSAVIVGTYLHLDFHSMHTEVNKSIKIQTGVLNVLHVFWGACMLALCILGLLDTWWRGEFLGADLLWVSVLFMTTG…	770				osc	1.94	255.19	6		4.30066	5.15796	0.000517241	0		P						12.2078		0	51	0	770	6.62338	0	6.62338		0.8648		4.29		1.71702	0.540408	0.776222	7.00319	18.4205	4.30361
13602	13629	WBGene00017798	slc-17.8			F25G6.7	H2KYN8, Q6A592	H2KYN8	MVVLMKNAVKINYDDAAKSPDQLLRSMSSVHPISDGIPSQQRPLTYRWFPSWRFMTSIMLCFCFGCVHLMNSNMGMAIVCMVNSSATYDNETYPENAAPLLDWSSDEQGYIFSAFNAGLLVMLFTGGMADKFNAKYMILVSVAIASLANFTLPWMAPISVYWAIFSRFLVGFADALLQPAMNSLITRWFPTSERSYALGLATGGRQIGTLIIIPAAGALCSQTEIFGGWPSIFYLSGFIGVLFIFSYIFLGADKPSKQSCISDNELKFITISNQSEDVGKKRTERKVPWKNILKSGAVWASVISLVCHEFPLMTLIMFLPSYLHDVHHYHSTENGILSALPTVSLWFAKIGSSYLNTWLQKNTTWKKDTICKVLNSIGSIGLGVFLLAATFLDNEHAWM…	527				osc	0.68	231.76	6							P						7.59013		2	91	76	527	2.8463	14.4213	17.2676		0.1628		-12.201		7.20707	8.82093	4.73594	8.15279	45.1904	11.6605
7120	7181	WBGene00018742	F53B3.3			F53B3.3	Q20712	Q20712	MDRNVNSPRVLADQLRRFIQNPDSTPSGSGISLSDAGFVLLSLKDQILADSIKAQHFSHEFVSKPINGIELLGKVVIVLQGIVNSVEGSGSKISYLLNRNSTNANRKRKAAVAEADCIESIKLLLEKSESTWKSFLETSTGLDAIMYSIHSPQLDSKCYSLEILLLLLEQPQGFVILLRALTVLAARNRDYLRFSIFVAQLKHGLHTKKLHIQILVARLFNKLIASAPTPVHRALVKSEVSLAQYNPEVVEKLIGYPNSSYGGMDTLIDELNAWKSLNQYVGGSGPTVEHNHIYGTSEVDGSSISERSRRHAPSSKIMPVTSVVKNVERQRFRKQGAGSGGRAAGNYYFEGGGGPRLTYDRRSQTLSHGSYAEPSSPIPPSRMGYATERREPFGAMRRA…	689				osc	1.73	225.81	6		2.85845	3.67485	0.001873	9.17865e-06		P						5.95065		2	406	360	689	6.67634	52.2496	58.926		0.9777		-4.479		89.6807	87.7401	78.617	84.1439	51.0366	20.0516
17395	17404	WBGene00021002	W03F9.4			W03F9.4	A0A0K3ASC9, O16992	O16992	MSKTTRPISLNRIVQRNVRYCAKQLEYFLFPVLTREVVFFLTLWTVLDALEMNFMNLAPKSLEVMAFGIIGTSLLAQTLVSLLIGTVTALTVITVIRCSLIMMLYYNGWLFEEIGKKPSYATTAFFVILGFISKRATFFSYQGILPWLLPPKVEDTVAKYLQTMKPILGEKEFLELSEQAEEFKSTIAGGLQNKLWMKWAVSKNYLSDWWKEVVYMRYRDSLIRTNVGCADVIYQKTTSNQAARAAYVTLNRQHFCNDIFKSEKMKPVSLGGIPLCAQQYAEYYRTLRIPHETSDKMIRLPDAKHIAVYHKGCWYKIDIFHGKRMVKPSELEKSFQEILDSNDHISQQGEKYLSALTIGPRDLWARIRTEKFSKGGVNQESLSFIENSLEIVFLDEEER…	746				osc	1.51	251.53	6		1.50323	1.81118	0.0131971	0.000455185		P						1.47453		0	8	0	746	1.07239	0	1.07239		0.0754		-14.207		5.19037	28.0619	6.95407	7.7917	26.2712	11.4149
19317	19324	WBGene00022161	Y71G12B.26			Y71G12B.26	Q95XM7, W6RS20	Q95XM7	MNRREKSRHELALIASTGAYHTFDQWTRALLPFAQWNLVPGVGMDNFIWLTALSTSFTLLGTFFVARMIEVLGLRNSAMVSTALIILYQLVVCQFNNLYIYLILQSLLIFNNMQMIIDAAILNMESEDGDYKKRTRLITRIMIPQSIGYALGPYCALQMIFFVTPSLEISQALCGFLAILTLLPVIWNYFPDNPNSNLSLVPDLSGYFDVLKSDNVKLYAVLLMMVTGPYTAYDSLLRNSMASSAIRDPNNMHNLFLTLGLTTLFVNLILLPKLQTMISTQALLSGSFSVLAGSYLYLAVFHDLIHLFIGMPVQVAAATICIGELSSQLMGAIGKRKAGTAASVLRMSQLAAILLVPFVHGMIVPHHDVVSLCVMSAAISGGAVGLVKKFGSSMVFSSE…	409				osc	1.4	269.49	6		3.73485	2.26491	0.000139134	0.000130133		P						5.62347		0	72	0	409	17.6039	0	17.6039		0.0621		-13.671		8.78408	7.96365	6.61263	22.8101	46.2786	24.6622
17680	17687	WBGene00022417	Y102A11A.7			Y102A11A.7	Q95XJ8	Q95XJ8	MSTIGLRNRWDSPDAEPKNITSLRTIEKLLSDAIEAPRLVLFEKRVNTIDPSFYDCVYSIADSSNTITERCYRDIGCCASGCCTNTEWQEKYGWAVALICIFSLVVILTVICWMGIWLCNRRKDKNQKKELLKFGSSSSVSNMSFAYPIANGHYHFGTGPFQSPPLNYPTKY	172				osc	2.42	231.54	6		13.1204	13.0232	4.55129e-05	0		P						5.23256		1	68	52	172	9.30233	30.2326	39.5349		0.0893		-14.314		32.8986	24.4461	11.6581	72.2132	59.7028	56.1066
11179	11229	WBGene00003527	nas-8			C34D4.9	Q18439	Q18439	MRRNDLLNNKITIFLSSLSLFVIIIPIYAAEKDLLPPSTSSETFLTDEDFLRPLNDDETFLTEKDFKNGEKLGEDHVPAGSILWKQVYKKGDIRGKAAWKLDPKNSESLRRNGVITGTRKWPNGRIPYVISNQYNDRERAVLARSFQAYHDKTCVRFVPRTAVDNDYLYIGKIDGCYSDVGRAGGRQELSLDNGCLQYDTAIHELMHSVGFYHEHERWDRDEHITILWHNIDREAYDQFGKVDLAESSYYGQLYDYYSIMHYDSLAFSKNGFETMVAKQSEMTAVIGAAIDFSPIDILKMNLMYQCSDVKLPPTVVGTTDKTIVPVPAPSVTVVEDDCRDRTNLCWRWIDRCKSFFFEQIMKEFCSLSCGYCTPKALQTAKASPPNYSNTLLTKSSTSY…	403				osc	2.25	213.38	5							P			yes, but by other			0		1	76	43	403	8.18859	10.67	18.8586		0.0884		-16.855		27.5952	53.8369	32.0757	37.9735	32.8764	49.6684
12852	12880	WBGene00020017	R12A1.3			R12A1.3	A0A0K3ASA6, O16701	O16701	MIRTIIFTSLTFVSVFGVIDICEYYRHIGKLHEHPECARQFTTPTPTTAAPRIGFCSSSAALIQCTADAQTCPLSGQVCIQSDGNKCCQIVTAGIPASEINSKSGSCPRPLGISVFQDNTIGCWMDSNCPGIQKCCVEPNPVTNSATRICRDPVGIASTSICSLPLAVGSCTAPAVRFYYDASSGRCNQFMYSGCGGNANNFQSLSSCQGTCGQSGVTGTPACPADANSGLNCLFAHADACNSDKDCLGRENTAQPSCCMTSCGYKICYQY	271				osc	3.07	207.74	5		3.85844	3.94822	0.00164234	0		P			yes, but by other			3.69004		0	7	0	271	2.58303	0	2.58303		0.6608		0.892		64.2054	31.7367	32.96	80.7738	88.843	50.8892
3776	3838	WBGene00000652	col-76			M110.1	Q21528	Q21528	MLVPHSPQSILVVSTVISTFTFLATITLLPLFYMKVQRINSQMLTDLRNCHQDSTDIWKQLSQENVRGKRSYGRDAPSIPMGKCCSCQQGKPGPTGPKGPDGGPGQPGLIGLNGRNGRNGKYVASEAHNEPACQKCPVAPPGPPGHPGRKGPRGTAGNAGTAGKNGIPGRMGPPGPAGVRGPPGELGMRGPQGDPGKVLNGAPQGQPGRPGKVGSRGKAGHTGRDGRPGLEGTPGTRGVQGERGSRGARGPPGPPGPAGSDGRKGSCAHCQSDDKLSQGGANRRPEETDPEGEFSNQQPASYEEQPPVITTTTTETAPVYTNPPAHQPVHRSFPSAEPRQSHKNSPSVPVPQEQYNSANSEVIPKTINYPDTINHQSYKHDGDVSVAGTTDDSEDVNVI…	499				osc	0.74	187.35	5		3.15834	6.08067	0.000139134	0		P		collagen				21.2425		1	389	326	499	12.6253	65.3307	77.9559		0.8052		2.441		96.7428	87.1629	81.2257	99.1624	96.959	93.859
7240	7301	WBGene00010057	F54D5.15			F54D5.15	Q65ZB4, Q65ZB5, Q9XVW8	Q9XVW8	MAHRSAPFISNKFPPAQSSAPNPSRMFCVSYASTQQSANTPTIHEQQEEIYSSLKKVRTTDDLTSSQLSIDKHVTMIPLGSPHELHREITASGTLIRVSSGLPQKMDMGANEKMKELVPKMRPEATLQSFQPVRQEAPQKKVEIQEPKKEFESWSGRAMEGRVSGGQVRGTNNMRGYWERNIQIEQRQRAEDERRQRPKSYGFPKWRSTDALSASLVASNSIQIPVDSRIPVERLRKMEETEREAIEVKKEIHEEAEMTAGVSNTRKLSKGKSLDSLSMQVDYQPWYDTEKIKSAVSRESIANIATSREFFETASTRDWRSGANSRRDSMCSLSIAPPLPPKSDAMQLRQATVNHASRPPTNYHQNGGYGQQYEPNLSSVPISSGAQNINMLTISSGYD…	563				osc	1.59	193.29	5		2.68518	2.83735	0.00673092	1.63502e-05		P						4.4405		2	477	412	563	11.5453	73.1794	84.7247		0.9442		12.175		91.1201	87.9047	82.6357	67.1408	68.1037	49.6684
15607	15627	WBGene00011524	T06D8.3			T06D8.3	Q22250	Q22250	MSVPASRAHSEVFSASQYGGVTTVPAPRPRSYINYFIFPSAVLHVVGIACLAALWYYLRFTSVFPYHHRVFYCRDVHLYKPNFVPEDFNVYVSYPLLYTLAFTIPPLVILIGEVMFWLFSTKPRKIVYANCGECPVHLFTRRLFRFVIIYLAGLLIVQIFVDTIKLMTGYQRPYFLSLCNVSITACTAPLEHSPSPSPHLACNYRGADELRYAWLTFPSLHAVVSSYAACFASLYIYYMINLRGAPLLRPLLIFGFMGLCIVDSFSRINGYKNHWRDIWVAWVIGIFMAWFLCYCVLCFQEVYHMTIERTPIVQEERVSPFFSWFRLPRVQAPSVKEEYVVYEEDVERPNGTLRNRHNQGNRQYEVTTTTESFHRTISPQQQQQQQQGHQNDGYRY	396				osc	1.53	182.71	5		3.14035	7.40909	0.000644843	0		P						6.81818		2	125	125	396	0	31.5657	31.5657		0.0396		-4.22		10.2506	6.33505	1.22083	21.4665	12.7806	38.2633
1095	1162	WBGene00015388	C03F11.2			C03F11.2	Q11123	Q11123	MNLTASVSMVYDGGHYIVVDSPSATDVHSKELMLKGIASRNIVPGEIQYVVTTHGHPDHFGQGNFFPNARHFFGSYEYSDTNFISTELHTKDIMQLTKNVQLWNTPGHTAQDVTVMVHNVSCCGIIAVAGDLFYNEEDANEAAGIWFQEAWNPIIGKISRNKVICYADYVIPGHGKLFRITQEMKNGADCFTKYETTLDDNKTVQSSPQFQNSIEQVIRKPAETLFSSANSVSFNYIGSPSTSASSSTRAIETTTAYSDSTTTTFYTVDLTAETPSTLESDIIFNSQENLPPLGMKIKKNANYIELPDLSGDVHPMVQSFAKKVSDVLKQPQNEAEISKMMPHLKKWQTTLTKLWKQYMNAN	362				osc	1.77	184.32	5							P						13.2597		1	40	37	362	0.828729	10.221	11.0497		0.0122		-10.135		36.5831	66.4456	11.6581	54.1341	61.1373	30.3414
6048	6109	WBGene00017909	F28H1.4			F28H1.4	Q5R3Y2, P83386	P83386	MTNGDNVSIVTLDPVSDGISTNHRVILHPEALEQEEPPIEAPSPPPLPPPIQKSAIVALDPTHILQNEESKSKKEQKKEKMYDSPRYQTTTTVVETTEYIGNDGPAVRIEFPRLDCEYIRTLGGIMKIVCIVLCLLTFIFVMMGPAYYTGVGWATFVSSVGIFVTTSLLTLYLFRVVDTLPSINWIVCEMVYCFAWTVFFFIAACVLAVASSQFRGTFAWAIAAFFAFGAMCAYGFDCYLKFLSWKNNERATGGSNPVVIQQQQRRNNFV	270				osc	0.56	200.4	5		2.49573	2.15342	4.55129e-05	0		P						22.963		1	128	106	270	8.14815	39.2593	47.4074		0.0227		-10.985		15.6792	9.6733	5.52198	23.4463	38.6441	47.2759
7002	7063	WBGene00018641	F49E10.4			F49E10.4	N.A.	H2L060	MAHKTSKSAGWSFKPPRQELNLIQYTCQVEPLDVQLLNHLREQAQNTDDLSVLFNILPPVEQLVSEIPYTLPLLEAIYLKCELRTVEDGLILPTKELCCEQLFCQLVWWTAFCEQSNSSLKKHCAMFAEFQPCIATLMSIVGRQCPDLVKRAREDRNQLKTCLESLGCHGLVNCSSGLIRMTDAVHLELLKHVENLKIICSQIKELQHDPKSNAPDPSCESHQRQMSMRLSQVFERLKLNETLQCVLEETFQNQHLGSLLRICRKRVGSDKLLIGLFNAFARAAPEDFALQQMDPIVAQLIVVFNNSYNKLLQMCPDDVSSTRLSSGSSTSSVSQGASSINEKFSVRPSENSIQFDSLKQEISKLRKELRVANYTITQLREKSEEDSVIKESSLPLPDY…	612				osc	1	222.4	5		2.40964	2.93863	0.000173887	0		P						3.43137		2	121	86	612	5.71895	14.0523	19.7712		0.2482		-11.887		26.507	53.8369	76.1582	27.0572	27.0376	22.1592
8663	8722	WBGene00019636	gsto-3			K10F12.4	O17234, Q8IA74	O17234	MVLPGNCSTSAALCMQFLTQLASVAIDQAYQPPQQPAYNPHEKLFVSYRSVPPPGSSPSSAAVPIRFSSYSSVGSNIRGLNSPTLHPGSIEPPLTPGNYRLYSMRFCPYAQRVLIYLAKKNIPVEVVNVNPDRSPNWYLPKSPIGRVPALEINGKVVWESNVIVEYLDELFPTNTILPRDAYEKAHQKILVERLSPIMNALFEFYGSSNNPQAQRQNDMNVHSALRNSENLLRDTFYGGRQPGYADYLMWPFLERLQLLTMSPNSQFRYFPGLHYPKIGAYIARMQNQPEVLGFCKHDFFLKKTGEKIW	309				osc	1.05	222.74	5		2.44864	2.64382	0.000396807	0		P						9.06149		0	50	0	309	16.1812	0	16.1812		0.529		-0.933		59.7126	56.5782	21.5328	87.4159	52.2034	69.2459
16200	16218	WBGene00020766	T24C12.4			T24C12.4	Q22723	Q22723	MREVQNRNDWHCIIKVRAMFRRLGTFSITPQLSVMWKYAVVFSAIFLIHIVDAGFQISQLKPLYKEDNITISELSTALGAAFPPCCSDIISSIACRRLQQHNPSKFLDRCATDADFSLIQCCNTCGMESAADRYELIFQAGHKSNQCFDRHGSEFCKRFLKKEDVWGKSQWSCDGSTAHLAFRICRKTCNFCRRDIYRTPLGRFEPVSCGKPPVLIPN	218				osc	2.37	216.31	5		4.98089	8.59814	0.00187761	0		P						0		0	15	0	218	6.88073	0	6.88073		0.0221		-24.485		26.7772	19.2041	8.11594	47.2366	29.3712	62.0437
17352	49	WBGene00020947	W02F12.2			W02F12.2	O45145	O45145	MESSSINRWFEYESGHAWCESAYKYQTLPYVAEFANTCTNLPIIVLPLVNIMLLRRYLHDVNGGLIFPQLLLTFNGLASTYYHATLNLFGQLVDELSLVWIITVFLVVYIPVMKWFPEKFSKRLTLVRWVVLIVTALVSGLCFLEPNLNAIALMLFSIPAAVVINYEGKQSGIPDIESFPSRILALWGVAFSFWFADRLLCDFWLYLGTPYLHALFHLLAGLAGYTIFIMFSMIDIESRTKTHKYTAAVRYFPGKNGSIFSFPYISLKERSQ	272				osc	1.53	210.58	5		5.43058	9.0981	0.0002721	0		P						4.77941		0	8	0	272	2.94118	0	2.94118		0.0054		-20.296		8.35667	5.71358	1.84721	24.0776	27.0376	43.5077
19147	19154	WBGene00022026	Y65B4A.2			Y65B4A.2	Q9BL59, V6CLS8, V6CLX0	V6CLS8	MYPTDKEQTRTTFETRSRRKRLAQVAATIASVILLLLAVLGLVYGSFYLYRRYVTDANDKRDNDEYLRKLVRQVNDSPETTWKAKFNKFGVKNRSYGFKYTRNQTAVEEYVEQIRKFFESDAMKRHLDELENFNSSDVPKNFDARQKWPNCPSISNVPNQGGCGSCFAVAAAGVASDRACIHSNGTFKSLLSEEDIIGCCSVCGNCYGGDPLKALTYWVNQGLVTGGRDGCRPYSFDLSCGVPCSPATFFEAEEKRTCMKRCQNIYYQQKYEEDKHFATFAYSMYPRSMTVSPDGKERVKVPTIIGHFNDKKTEKLNVTEYRDIIKKEILLYGPTTMAFPVPEEFLHYSSGVFRPYPTDGFDDRIVYWHVVRLIGWGESDDGTHYWLAVNSFGNHWGDN…	421				osc	1.1	208.15	5							P						8.31354		1	61	61	421	0	14.4893	14.4893		0.0102		-14.003		33.5937	41.2479	19.7494	49.4154	51.0366	56.8583
12351	12380	WBGene00004155	pqn-73			W01C9.3	B6VQ50, B6VQ51	B6VQ51	MSRPNQIVTQFPALDHEPRGQGPPPSYRNSAATEDSWSTMSGSGPNQAMSGQRRNSWNNLVQVGGDPIVQKQPPPRPAAPMSTTFSVNSRTSSLMGLQQPTVFSTQFSAQGQALPAQKVYSNDPRLVSIPRPAGTIPSLGSMPPSRSGSIITGPNPSPPSSQKRKNKNKESKSSLNKPKRNRLQELKNFCKKPSIMGCCLCLLLILIIAIIIIIILTQVLPSPKNATFTWMAPQSLTNGQNSSSRIEMTSKKERIRFQTAGSPPIKGNYINYYDFNSNQVVVIDQSLSANGKNLYCFVLPLDRSSMPNPGDVRKAAKNSVLKHQQSDGWQQVWSWLPSPLQQTNSGQSMFNPPIPECNGSRIIQLQQTSDQRNRRCTDCYDFCLPQFGIMKNASENNEE…	799				osc	1.85	138.81	4							P						22.6533		2	629	601	832	3.36538	72.2356	75.601		0.9971		45.161		97.8138	96.2614	87.8752	99.1648	98.9388	67.5682
16461	16479	WBGene00006487	tag-141			C30H6.2	Q9XVR4	Q9XVR4	MMSEGPVMFDTVLYGVISVTVVSLLSLGGACIGPLMTKDAKHRWLHFFLAMAVSTLSSDAILHIIPQVVGVHDHGHNHGHSHEHHHEHTDLENGTSGHGHSHHHDDSDRIMWYTVTPARKNLLRLSVIVLSIYILYFVEFFMFYRKTHLHYCSPSTKSPVITSSVSTHSDIKSSASNHSITGSEEDNNNDSSKKERRNSVELEKRREQGGHELISLREDGDDDGTEICGLKPRALIILFGDGVHNLVDGLAMGASFMISVKLGFITTIAVICHELPHEIGDLAVLIDSGLSMCTALILNLLSALTAYAGLFIAIVLGRDEEIETILLAITAGMFLYVAWVDMLSHLKHDSLMADHWMVTSILQLSGFTLGFALIFGLGWFEHMLEG	386				osc	1	148.11	4							P						13.2124		1	158	154	386	1.03627	39.8964	40.9326		0.3772		-20.395		15.5318	5.85114	49.9312	24.0776	27.8261	44.1489
659	726	WBGene00007146	B0334.6			B0334.6	Q17478	Q17478	MDELITLEGASQSEQIIGSHDFCNFSNITHHEHDEQSISIVWWSNVAVLPVIALIGLACNLLNMAVLTSNKTARRIPSWNLLIALAVCDSLFLIFATLDVTPLSIPSLAFSTSFNHFYSRIVLYIRTLASTFYKSSVLIVVAFNIERYLCVVCPLNSHRWCTSRNSKNAIATAIVLSFLCSIQWPLAYDTIRCFESNSNQYYYVILMSTNRALQIYYRTMDYVSLFAFNVLPIIGLLYMNSRIIFTLRRVVDEDSRKYEETKLSDGLIQHDAHNNRTMRANAMLFAVVFMLFFCVGPQAPARILFDMYGQYHPKAILYVCLSQQLVFLNASLNFCLYCVVSKRYRTLMKQTLKKFLHKLEGVDHPFQINLKQTKSSSAHVTSLEDHHAHLIQNV	394				osc	0.81	140.67	4							P						0		2	100	72	394	7.1066	18.2741	25.3807		0.0332		-13.298		7.10391	7.5608	1.39769	19.1059	21.4468	24.6622
2897	2963	WBGene00008314	C54G4.4			C54G4.4	Q18849	Q18849	MIRAKQRLSQIVAAIQIISVALSHSIQTHLLYLPPLTWKGAQSRGRPPRVVRSSPPLSLSLRGSHSCSLTGANSSATTVCRYILFVFLLLSSRSYLIHNTPPIRTNTQYNNIQTLLSLFPTIHSKHFLLFMVLYQLLFLLFFRRVNGLTFPPTSPISHIYCLQPYVPENAHVIFNEPGPYATDTVAKYSCALGFDLIGSEERTCLSDGSWSDEPPICAIDVAYNKPVTQSSGNVAMSLGGTMCTMTNDESKSFWEVDLLGDYSIRSISMRLGTKSSPIVSVEAIETGGAVHQCIVDSSLFTINTTTSISCSYDNISRLRITATRRLHLCQVNVYAVNAVSPWQCAQSQMEVVGVFGGMCYAASRDEQTDWLGAQRKCLDRGSTLPLRIDDSTRRGLRSA…	868				osc	1.37	172.82	4		1.64166	3.21804	0.0472316	0		P						13.8249		0	31	0	868	3.57143	0	3.57143		0.8677		-3.898		67.9071	68.6711	79.3245	79.0494	22.7684	13.9204
5770	5831	WBGene00009060	F22E12.3			F22E12.3	Q19740	Q19740	MYPSGILVSTLIICFIGFSFGFQRYPVRRFNQPNIRKLPPSIQRIRATSSSVPIRTTTVQSLPYNFKNLENITSIRQLLMETAIAPMKSVGPVARITQNINTAQLPCCRDRFGEQACQSLRKSQPALFEKRCLTDHDFAAIDCCGECRKYIERNKISSENSRSLQKAPAMCKDKHSIGFCRRFKASGMGKYSCSDAEFAVRVCRHSCGYCNDELYSMKNAPALCSDTNRMIPIVNGTHLYWAFGREDKKKLN	252				osc	1.61	158.52	4							P						0		0	12	0	252	4.7619	0	4.7619		0.3387		-11.078		45.2813	25.6988	39.1722	49.4154	43.0189	58.2756
10224	10282	WBGene00009155	lhfp-4			F26D10.11	Q9XVU1	Q9XVU1	MQQFSLSYHSIYTRNWRVVGAIWVLCGLCTTVLQTLALIHPTWIGSDEGGYFGLYDYCGTSECPWSPFRVRPLSMWFEISAFLVLAATVLSFLAIFSILLLVLLRDRHAFILCSWLHFFAFVFMLAGCVLYPYGWENPRVREICESKKYQLGLCQIRWPYLLAMVLVFDQLCLCCLGFALALKKPPKIPELSSLTGPTVISNTIQPVPRPRKMSLQDSFYSHSGSRLEL	229				osc	2.08	135.77	4							P						9.60699		1	44	40	229	1.74672	17.4672	19.214		0.2884		-26.555		18.4648	5.37706	9.35888	58.9732	39.6782	65.1363
6112	6173	WBGene00009292	F31D4.5			F31D4.5	O45420	O45420	MTTKTTPKELKAKKESKKKGSAPEPPKNGPPRTSPPNTIEKKGILRSLSFQFSNLTRKKGNDYDLTPEEEGDGYGDEMGPVLGVQNYGILMKKYKRKNRSARWAKRFFVLKECFLIYYSTSYKKVFEKTRRIDLHPKGIIPLIGCSIVSGGDVDKKNCLLIAHPQLPSAIIVAASDHQTQEMWLKALRSATKISYKNTVVGETMIRELENRGVLLNEEKKSYEERLEAEAKARKEEHDRADELAKDKEELEAEREKLIRTTKKLKDDLQNVKNELKMTNEMKKTLEQEKMSLNSKTEHLQANMESLNIEKEKIHEQLQEIVREREKVLIDNQNLSTDKCQLNNRLMEIETSRNCIMTEKEKIENLLKMNEQKTQDLEKERQYYTMKTSELMDHLKEVSE…	570				osc	0.67	167.84	4							P						15.4386		2	203	140	570	11.0526	24.5614	35.614		0.1773		-20.198		60.899	73.434	80.5232	21.4665	65.2837	35.4827
15349	15369	WBGene00011310	T01B4.3			T01B4.3	Q7YTK9	Q7YTK9	MSSITRAVTSRLSEFTNGRQRLTSEKQAVTPGQFNYIIPPEIIWEEYQAQKQEPLKVEVEPEAKVEVELPEKKTSPSIFSQKMSAVVRKLSPFSDDSSSSTSKEKDPGLAAVVEDEKSAKKNGRFKETKQKMERFKKLRRSKDRQQLIESSDDES	155				osc	0.6	152.04	4							P						31.6129		2	154	154	155	0	99.3548	99.3548		0.0563		-28.383		74.7015	59.1697	58.6269	62.5522	69.5185	79.0862
16230	16248	WBGene00011999	T24F1.7			T24F1.7	Q7YWR6	Q7YWR6	MTSEPIIDEYDGGPTTWEQLVPVCILTAILLILLIACLKECHFKYNRRKTPEPPRDLGPLPKITVTNGRTGEERVIQE	78				osc	2.67	170.56	4							P						19.2308		0	29	0	78	37.1795	0	37.1795		0.0171		-39.661		36.2	13.5593	11.6581	61.3854	51.0366	86.4603
18292	18299	WBGene00012744	Y40H7A.4			Y40H7A.4	A0A078BPK0, Q9XWA5, Q08I41	Q08I41	MVAHFVSSKCAGYFLILVIFILFIANYYRLVILLETIEKLPPDTNYPNHQLLDSDSPIRELRRAALLSADQVQREIIENAVGEDNKNFYQKLRPEAFCPLKIKIGGKGDGGKIVCNPKAIKDDCTLMSLGLNNQVDYEQEIYNITGGNCLLLAADKDPQNMNTLRIFSTLKSHVYVGMIPDNLTIAHIMHSEYKTEVEILKIDIEGGEHTGLEQFLRDFFVCQILIEIHGWPPEHLDMLQKISRYGFRIFNIEPNRLCTRCAEYSFINELCMSQYSVLPLANMIPRNLTVV	291				osc	0.97	135.23	4							P						8.24742		1	61	58	291	1.03093	19.9313	20.9622		0.0063		-16.816		12.8077	11.8251	2.30901	33.9008	21.4468	44.8514
19414	19421	WBGene00013539	Y73F8A.35			Y73F8A.35	F3Y5R7, F3Y5R8	F3Y5R7						osc	0.94	155.4	4							P						0		1	47	32	654	2.29358	4.89297	7.18654		0.1486		-16.193		15.608	43.4169	16.0919	44.1562	9.74699	51.5033
20173	20179	WBGene00014099	ZK836.3			ZK836.3	Q7YWM9	Q7YWM9	MVSSESRECIVSPTNESRVSVSVIDKMNNYNHPPPRSFDFDDEPPMVKLDFEANNGERPRGGSGRRQLEPISQSTLNMFACLVAATIATLAVIGLVITFFVLALK	105				osc	0.86	177.65	4							P						0		0	34	0	105	32.381	0	32.381		0.0075		-15.326		53.9523	37.8728	19.7494	81.6532	57.1088	84.4412
11968	12012	WBGene00015035	otpl-1			B0212.1	U4PBH5, U4PEQ1, O45067	U4PEQ1	MSFQQDIHLTTRRNPVKAEAASPMGRSLRSLFQSAMMRLLSVAENAGPSARTSLLTACTVFYALFLTIFSLVLELAHLLNDEESRKLNKKDIIFGLYMYGGSLLFFFYMYIVLLLNPRWYSTMEYLKKLFGICRTSPKVAPSSDSLSSAAATVRKVTHSSPSAGSLFLRLGSVVFGVTGVVYYAFLVFLCELDPNCSALSTSLDVCAILFIFIQMHFIFCNWKLSITGSHMVARVGTMHLVAANLWTWIRYVLMEEGVMEKEIREVFNHRPPGHNYMRSNSSDSSSSAENSMEQFLGDGSHEDEHFEKKIMPGSCQAVECILGSMSEIMFTSIVEYSLIAAAVMYIVWRNIGRQDQGSTYVKRKHQIRVDCSKTTTGLFLGLAFLAVTFTSMVVYYGFT…	615				osc	1.07	153.08	4							P						13.1649		2	149	84	615	10.5691	13.6585	24.2276		0.0556		-11.05		4.06288	4.28887	15.2395	6.87792	22.1125	8.98059
5939	6000	WBGene00017835	F26F12.4			F26F12.4	Q19809	Q19809	MSSSSNSNVAQLQQMGQVAGTGPDEVFQHGTIGKFIRMELEGGFSSFVRCIYEAKRTNNNTVTLVCERDQECCEHGCCPKDQHWMAGVYVLLAFVLLVFVVGTCLMICCYQRSKNRQRKEELEAAEFRNAGGYAPSQVGGGAYSSYGGPTY	151				osc	1.33	171.18	4		2.81959	8.10975	0.00257704	0		P						11.2583		1	60	38	151	14.5695	25.1656	39.7351		0.3909		-10.507		51.0734	18.3837	22.4662	73.4169	88.17	54.6966
6610	6671	WBGene00018300	F41G3.3			F41G3.3	Q20292	Q20292	MDRRRDPRYKQQEAHHYDDRYNNTYDNYDYEEDYGNQYANTVPHHHHPHPHAHPHHPEDHGYDDEEDHWANQRDQQDFYDTVPATNVPPVKPMGPPKNLARVQISTSIPSMESDNSPIPQAPPPPRFGPTGGYNNNNNNDRKTPVSKYGNMATTDIKQRRDPSDVHIRFDPGAKRDLISKQSSYIDGYRTGESATSAAKKKESGSSSGGQATNTIRSIINNLKSGGAEKQEDTIPRNRVSTNPFMRANQQQQQQQNHNATRFENNKNSSKNVAEVVEKMNNGDWPIQIEDEDIPPSAAVNNPKRGYQQQQADKARQWETLHRKKDEKRSILDEVAHLTGAPPAPPLPAQQPPPVAHSSQIPQKQQHPQMQKQQSREEHDKMSDKSHEEEHTSVSTDSAL…	539				osc	1.67	140.13	4							P						18.9239		2	489	489	539	0	90.7236	90.7236		0.9913		5.433		94.0211	94.6279	80.7148	93.2007	52.2034	94.2054
17461	17469	WBGene00012271	W05B2.2			W05B2.2	Q9U350	Q9U350	MCSLNNQVTFILIIYIQISFTFGTIPLSEGLHQIYARNAADLKKFGENCTRNTECVSEAICLGTCRCKSTHVPVEEQCWKKIEPGNVGCTFDEQCEGVWPMTRCQNGQCECSEEETLIETPEGNVCVLEGNCPTNNVNGALYDRATHRVSTCLTFTSKKDKNTQQFIGCDEYPEVYDCIGGTCCPTRGMTCIQPLNTGDTKDAGAVVVADERWWYSSVTGKCIPFKYTGQGGNSNNFLTQWQCESYCGGRCTRGDPLPFDDPIPTTTDNHICKTHESGRQLCCPTPTFICSSLGGVNVDKTTMRPFSSGSPRRGADTIQRWYWDTNDLTCRTFKYHGQGGNFNNFGDKQGCLDFCTEKLCSHGSPLNDPSDNVQRCSGKEHCPETHDCKNTVCCPKPAA…	1278				osc	2.17	91.87	3							P			yes, but by other			2.11268		0	1	0	1278	0.0782473	0	0.0782473		0.5557		-7.375		87.7598	64.7187	86.8411	79.9165	12.0216	27.1457
15594	15614	WBGene00020281	T06A4.1			T06A4.1	H2L0K5, Q9TZH1	H2L0K5	MWIDAGIHAREWIAPATAMYIAHELLLGYENDATVAKLMDHIDFYILPVMNPDGYEYSREKNRMWRKNRSPAKCARQTFSTVCCSGVDLNRNFDWFWASTGSSSDPCHDTYHGSAAFSEPESQAVRDFLEQNTPEAFISLHSYSQMWLIPYGHRKQSYPQDYHTGLRPLALRATKALYELYGTKYQVGTGADLMYEASGGSHDWAKGQLKVPYAYLIELRPKNTMMGHGFLLPEREIVPTGLETFESIKVVADELVAQFVEPVIRAKLTTTTKPAIPPYRRGYSIIDTTTMEPVDEITQKPTEAPTTEEPTTTTTEEPTTTTTTEEPTEAPTEPSPTTVEATEASTTPEASTSSETSTTENSEPNQKTSTPVAPEASTVEEETITPIKCVDYGDYCRLW…	426				osc	2.28	124.04	3							P			yes, but by other			13.0363		1	147	117	606	4.9505	19.3069	24.2574		0.6665		-14.086		38.1749	71.1938	53.0386	22.8101	31.9725	50.8892
34	104	WBGene00000002	aat-1			F27C8.1	Q19834	Q19834	MTAEKEPLKSREGDEAPQNETEGKGKGLEKSLTLFNGVSMIVGCIIGSGIFVSPTGVQEQAGSVGLSLIVWLISGIFTAIGAYCYAELGTLIKKSGGDYAYIMEAFGPFVAFIRLWIEAIVVRPCTVTIVALTFAIYGLRPFFPDCAPPDVVAELLAILLIVLMTAINCISVRLATIVQDWFTIAKVVALCLIILTGLGLLFFGESQYKDSFENIFENTSQDFTKVSLAFYSGLFAYSGWNFLNFIVEELQNPKRNLPLAIAISITSCTVIYVLTNVALYTAISPDEMLESPAVAVLFANKLYGKFAFIMPLCVACSTIGSANGVIFTSARLFYSGAREGQMPAVLTMINKKTKTPIPAVILTGALSIAYLLASKDVYQLINYIQISYWLAIGTAIAAL…	493				osc	1.02	110.46	3							P						6.49087		0	30	0	493	6.08519	0	6.08519		0.0285		-19.869		1.78335	0.294768	1.11521	3.72636	12.7806	10.2334
3078	3144	WBGene00000397	cdh-5			F08B4.2	Q19194, X5M8R9, X5M5L3, H2KZC7	Q19194	MGTTVRVSPNSQSESLQILVNDEDLQPGMPPATYQYILTGLGATIFAVDQRGFVYLNVPKIDADPPNPSTYQLNVEAREVNTVPTRRSEPVTITIHILDINDNSPQFEQPIYMANTTASGDERDVVKVVATDVDSGAFGQVTYTIAQVTNGGEDKFRYETATNMLVATGNLVPGERYQVVIEAIDGGGRSSQAIVIVLALDPMHQTFSSLAPLPGMETFMPNPLAMATTPGTMVTSAESEETIQTFVTEVNENTPPNTVVVSLGDESSRELTYFNVVGGNEEGKFAIDDAGTIVTAEELDREKTAMYSLQVETRSRNPDQHLYWTLVQVTVMDVNDNAPTFTDPQPIRLRLSIDDIEQLTGNMIIGRIGVEDADADDNGRLELRIMPPHNKLFAISNDG…	1449				osc	1.38	122.03	3							P						9.79986		0	35	0	1306	2.67994	0	2.67994		0.2159		5.708		30.4839	90.646	78.3886	6.73299	1.4591	2.40236
12452	12481	WBGene00004233	ptr-19			Y39A1B.2	D2N109, Q9XXR9, D2N110	Q9XXR9	MRFDCIEKRFAHAFGAYSGVVVRHPFPFFIIPILITAGLSTGLLRHEQAFMKDELELYTPTDAQARKELSQLDHLFHINDSDPFYATRRYDIRRAGYIIVTNQEEDGDILNPLVMHSAMQLWSIVQSLTVEDEDDRRINYPSICVKFPIPPEFSKALHSLFAPNMTTPEEICVSNPLVEIFKLLLVSDRSFLNRSIDEMTLSQISDAIQFDSGGMTHLLGGVTLDDDKRIAGAKAMLLPYALRHSSDDEDWVAEKWEVRLADFLLQYDSPIIRASWWTYETLAAESARDRLQLIHMLLPCFVCVSIFTIACCCVFSWRRSRPWLAIGGVISAAMAIASAVGILLLAGYGMTSVAYSMPFIVFSVGVDNVFILLSAWRSTSSTETLEHRMKETFADAAVS…	1003				osc	1.98	117.21	3							P						2.69192		1	150	144	1003	0.598205	14.3569	14.9551		0.2487		-5.611		1.12749	11.1078	9.85753	2.35323	6.37436	2.96242
10626	10684	WBGene00007242	madf-5			C01G12.1	O45233	O45233	MAFQPAFNARLINEVRKYPCLYNHSRRGSGDTMERQRLWESIAKNIDPNCAAEFAKKRWLQLRDRYRKELKIAIKNGFVTPVRWCYFNQLSWLDPFLKDNIGQAADEGKKTGKSDSFDEPSGTPFSWFGFPNLNSIKDEMEDDDSDPALESSVLDRLLAQTAQRLDSISPEIENDESGTQSLDGNLDGVDGDGDEEEDLKIKDEDEVEEDGPEKVKSQSEAMAMLKEAISAQSQQQTQQAQQVQQVQQTPQKPSVESLIAANQARFAHHLAAQLTGMSSMLNGARKSEEAAIPPLRPSTPPPTASTTSHFHPYKEAARNRHRQQTADNVMRYHLQQVGRVALEWLNDEDLLYSRIIGLKLKKMDPKKRKKVRHQIMSLLDETDDTHHIVDNDDSCSSPS…	423				osc	0.73	91.76	3							P						18.9125		2	291	281	423	2.36407	66.4303	68.7943		0.3075		6.026		65.5097	85.8094	51.7416	45.1511	43.0189	45.4729
6532	6593	WBGene00009586	F40F9.10			F40F9.10	Q20240	Q20240	MERTSSLRRKTSDGVLAKASNFGQMLEDVRKLALSKSLWDDEMQRDLPKKWEKHGDMIVFPQNTFTHINWRYIGRELWAVVAQSLNVARVGRKRLIDEERTPHVDLLLGADAWVDYVDERGIKFCYDATKRVFENSKKAEMKRISKWSCQGQTIVDMYASLGYYTLTFLVSCEAKQVVAIDWNDEILESLIRSAQVNNVDDRLLVIHGDCRRVCPDQTADRVYLGLLPSCRAHWLAACKALKPEGGIVHINEILDMTEKKKTPQKTEKVEKKVVAEKKKKPADGKEKTDKDAAPKKKKVLRQKTLPVLSAVHEDSKPEVESTSIPTAPESDEPSENNSETNGTEGGQKKKKFSRSASIVEEMENRVLPEVKIWKEYENEGWARLTDRHREFAKDCADSC…	460				osc	0.69	128.45	3							P						11.7391		1	68	43	460	5.43478	9.34783	14.7826		0.015		-31.182		33.7583	68.0938	57.5633	22.1518	31.1054	32.9108
7003	7064	WBGene00009889	F49E11.2			F49E11.2	Q20601	Q20601	MVHINLTRLAHDCELHMSEQEVDQIERRHARLDKSTDSILLMTPIFSIVSFAFSITLLAAIIYALLGRKIPSRKYCIIISRTLADIFSSVLIAAASLFANSYSASYMVLALFLYICTFGVIQLTSSHIAVIILRQISVTRPYGFQSICSIRRLSLIVGFTWILSIMYSAAYTPMTTVIVDASKEDRVCPFHSCQRPLIITAIIIVVVSMFTVLGSYAIVIAKMAQIAHSEKMHNEPELTRKRMHKFFKFGGHLALYTLIVSLIFVGSLFILHNAEDYHQVNRMIAINCDVYDYLNIKLRLETIAGGAVLLWCVRIIFDVVIAFLSEIRLLPWLRLDNLQTLDSSRVVSVRHGLGWQKGCVNCPVFNIENRLHPLDFKN	378				osc	2.42	94.96	3							P						3.1746		0	17	0	378	4.49735	0	4.49735		0.0526		-19.495		2.91329	1.08327	0.572341	11.7932	8.70793	18.369
8474	8534	WBGene00010010	gmeb-2			F53H4.5	Q93779	Q93779	MTECGLLMPLEIKKELAEDHHHEEPKESGIPILIPRETENVSPQRRSPQDTTDEELDFQLTGGDGNVNVLAKEASVSLPPVITVKCGTLTAKMVTKLFTCPGIHQNCILIDGETEYISPKEFTVRANKDKQKDWKGSIRIGKSNLRTLMEMRSLDFHDHPNQCSAKCQSRNYITPKDPTSDPSGRRRSSTTKLIPQNMFSHIPSAFPNASTSLFTVPKKETQMPEGQPTLGTLFKNPTFSRFVAISQNMKNNNFSTPSTTTQPPLSMFPTTSLKEETSTSVDDVTTQLLQQHQQQRVASTLFQTIPSAQPSTFWNTTDNRYQGNIEQQPQEMLAEMINAGLGDNIIDMIVNKINNMREKIKGISSCSNVLLKMLCSLNAADTFCNTMQAMESLQAEIAK…	517				osc	1.17	116.93	3							P						4.0619		3	469	437	517	6.18956	84.5261	90.7157		0.4703		-0.844		75.6767	76.5758	70.8647	48.3026	27.8261	58.9929
7574	7635	WBGene00010269	F58G1.7			F58G1.7	O62270	O62270	MSSRYYSGPSGIEQYVQQLPLLSLAFLPLISAIFGLKYVNLKSVIHFQQGTLGSSPWRAATTMTFLSTPIFFIWCLCVPTPSAIFFQVGASLALLLTALTSSPILHYLPSPSISMYYQLRFLSKPLRSIITITQCIHLSTTSIILLFLSSSFLSTITNLSIYLIIPLVAYFSLFAVIFSGHSSMANASFLLYIVVSISGIGIFLYYAVQDVQSFGILVPVENFRLSDILSSLMVGFTVNFYLLNSSFQYQIYSPMPTMHKLRLTLTFYGVFQLFISIFIFLSATIFLNFLREHCKFAMSFGSFFQFSKAILGNRIQVFTVCASMLCILSFCLQWTIMSLMTLTWEEYWAKRLRAWNPIQQLCSLQFGMLILTTAVVVLTVAANLARLPIGIQLPTIVYV…	569				osc	0.82	122.11	3							P						15.1142		1	55	37	569	3.16344	6.50264	9.66608		0.1256		-4.781		1.73913	0.0835176	2.55711	5.38197	17.298	12.2771
7650	7711	WBGene00010330	F59D12.2			F59D12.2	O62281	O62281	MGEREVNLPQLFSDVSRTISGISNIMGAGAEASGDGPGVGGSSSAGGGGGPSIAGNIFGNTCFKACGMEDIQFAARAAGEMFSTIKMCVLMSTIISLLLLVLLSTALLYFMCSYNQNCNSCTKFSLPSFFKRVTSTQSPVTAQK	144				osc	1.28	130.36	3							P						32.6389		1	74	41	144	22.9167	28.4722	51.3889		0.1614		-6.908		50.818	14.0211	20.6436	83.3579	93.466	56.8583
13603	13630	WBGene00011643	slc-17.9			T09B9.2	Q10048	Q10048	MDSQKECVFVSEKSKIFPSTRLFFSFLLCLCFVALAIGTSNISQSMVCMVKKPDTNYTCPLAEPEVEAIPCNHPKQFAWSSIQQGLIYSGQNFGSLFMVITGWQADRLNGKWTIVAAMAFIIVSNAVLPISAGASFALVFFLRVLTGFGDALLSPASSSLITRWFPPKERPSALGIVTSGRQIGTLIILPIGGWLCGSDGSKFLGGWPAIFYLSSVVAAAVLVIWVVFSADKPSKHLCISHNEEAYINRKIEEENIGKRNNRKNTPWKAIFTSKQVWVAVAALVCHEFPLVIMLQFLPKFFSDVLGLSNTVNGLVSALPMAILFLSKCLSASLASYLTANGYLRKTQSCKIFNFIASLGLGICIAATPLMSNLQHAIWAIIILCLANAFAGLHTPGVLT…	516				osc	1.09	101.64	3							P						8.33333		1	84	43	516	7.94574	8.33333	16.2791		0.0468		-14.216		5.15598	4.64505	8.11594	6.04028	27.0376	10.7566
11885	11929	WBGene00012068	oac-49			T26H2.7	O18139	O18139	MREKPPKNVDLQGIRGISIISVLVFHFFPTQFPNGYLGVDQFFVLSGYLMCMLLQRSDQESPCSLVTLFYSKRLKRILPLYLFVIFLELSSLYMVFPTTSVKTNQKSASQALIFMSNRPKTAEEDYFQMLSIGIDIFTHTWSLSVEVQFYLLIPFLYLIGRNFNKNLQFLYYLTLGCTSYIFHANSSSTVSFNSVFARIWQFLIGFLAFSFVSENDGCCQYKLVTESDEDLEESQLLEEKEEEIEEIDRKIGEKSLYFCQVLLIFATLLPIFCSIPLSSKVVRPLITIFTGFLIGISKNYSNLILSNRFLVYFGDISYSLYLVHWPIFALWKLTENDDEIALFLSLFASICIATIIHETYEKWYLQLCSASIGILTISFFIANVGLIEKNAIIDQFFGG…	688				osc	1.48	120.49	3							P						6.25		0	12	0	688	1.74419	0	1.74419		0.0239		-12.36		2.46622	2.52027	2.90101	9.93859	9.19921	17.4404
12198	12228	WBGene00012815	phy-4			Y43F8B.4	B1V8J3, B1V8J4	B1V8J4	MYPIYIFFIYSTYIFNFLTPFTDETLEFNDKIWDKCGKELRGDSSRDGRLVCYRLHKHLLIRKVEILSSEPFILQYHNQVHRRLAKRAVQEAEALRLEQLKISGFTTTPEKSQVRAANGTWLIHTGRPSFARIFEGLQANINSLDLSTAEPWQILSYNADGYYAPHYDYLNPATNVQLVEGRGNRIATVLVILQIAKKGGTTVFPRLNLNIRPKAGDVIVWLNTLSTGESNSQTLHAACPIHEGTKIGATLWVHEKKQEFSLPCALTNKLYNTKHFFS	278				osc	1.08	117.99	3							P						5.7554		0	0	0	278	0	0	0		0.0371		-11.653		13.2081	13.5593	4.51486	27.777	31.9725	40.5183
15263	15284	WBGene00018283	sulp-3			F41D9.5	Q94225	Q94225	MYKKMSLRQLFSDRPPLNAVLQEKAQKLRYACSPSKCIHSLLSFLPIITWLPKYDWSHSFFGDLSGGLTMAVFSVPQGIALASITGVPPVYGLYTAIFPSFLYIFFGTSKHNALGGFAVLSLMTHGAIEKVMLRTATSYNATAYVNHTLDELLDKENETALISNTTLMQILGNETSFVEEVTMEMWTEGVTPVKQIHVATTIIFLAGVIQVFMGVFRLQYLTSLFSEQVMSGFVVGGGIHVFFAQIGNMLGIELPRRSGPGYLYYRIWDLVENLDNVHIPTVCISLSSFLFLVFGKEYLAPWLNSAFNYPVPFELVLVVVGITATNYAELSLRHDVKVVGNIPTEFPPPSLPRFDLIRHIGLNAAAIAITAVAIHITVAKVVEKRYKYKINHGQELYAL…	782				osc	0.7	108.88	3							P						8.31202		2	115	115	782	0	14.7059	14.7059		0.1631		-14.495		2.8396	5.20511	31.1815	5.16089	8.22402	6.92459
7079	7140	WBGene00018702	F52E4.5			F52E4.5	Q20675	Q20675	MSEKIAEGFGNNGELCEYHYSFVQDGKLTLVGRKYVAQPNHNWGHRVAFAGTYVLTFDKESNKWERHDFPELVSEENSEEVLFVRDNQLYLLAFVNFGAIGFQKLFRWDSNSFNEVLLNAPETKTLTETQRFEVIAAAGTSSNGETILLLKDDNCHIQIYSLTVNGASSTVENISQIHSDDNHLRGSPVIAETVNDKVLISYAVHGCGFNWEKTRFFVFDLKSKTARHVDIEGEYSSLPQYGFVGPNCSFVDKKTNSFIVAGGRVQKGMTGSAFYGAVWALKGNIFDDKSTLEWVQLPQTVEEGEHIFDGSTLYTVNKAAVSKVQLDSI	329				osc	1.04	125.18	3							P						3.64742		0	10	0	329	3.03951	0	3.03951		0.0364		-18.994		58.0201	51.8226	28.2682	64.758	77.7499	46.674
7080	7141	WBGene00018706	F52F10.2			F52F10.2	Q9UAR0	Q9UAR0	MKQKVADSEKSVDPVFRITSGPTSLEKDESDSSLDAKEECFSLADEDAEETNWRLIYITAVVSFLGAIEGTAVHMSEWPYMREIDPDATVKFFGIASSASKAAHALFVLIFAVWSFKYKTVKWPLIAGRIIAMVACFIYLCIEYLPTGRRYLMMFCYILFDISGSSPSILRAYIAAVSMPKDRSKAFAAMSLSMTLSIICGPLIQMAFTTIPYPGFTIIPHVKFHVYSAPIWIANSTNFISIAIIVFGMKELPRKPKTKKPKKPSIFELEGLKMRIQKIKKANIDWILVFVVWIAKCGKTMTARSIGTLLPILMMVQYGWTGIETVRITSFLMGGSGLLSMFVIGSFMFCKLGTIVQPRFIYLFSISLFTMLYIVTYPYKSIGVEVAMYNATDNTGCDP…	508				osc	1.65	132.33	3		2.19968	23.0476	0.00251626	0		P						6.10236		1	84	50	508	6.69291	9.84252	16.5354		0.0331		-18.903		2.83223	2.52027	1.39769	3.72636	8.95603	12.7733
16006	16026	WBGene00020590	T19H12.6			T19H12.6	A0A486WVP7, A0A486WV31	A0A486WVP7	MWKSIHRHLCQRSETRETTERRNEGCRLFDVPWIIILVQFIVILALVLGLIAFFLTRSESSSTTSEYSTRTYQNFELQTISPSSSPLTFRRRFKTSTESPEGVDFNFSKDLDPVVVPVVPAEIITTTSTTKSHQSTILESVNSVEVFENDENLRAAVFTSSAECSAIGKSILVRGGNAVEAAIAASFCLMGAMPNKASLGGGLMMTVKTKNGNATTIIARETAPMNADIDELKKNPELTHVGPKASGTPGTLNGLYRAFQKFSSNRVQWKHLVLPTIQQCNKGFKLSEDLKKRSSAPALAQFFKANVQKDKILCTSLSTLLTDIADYESPLDAFYHGETAQKLAKELGGYMTASDLEDYESDMSSAICSEIDVDTKVCGPGSPSSFAVLANTYLATKNM…	587				osc	0.89	120.93	3							P						11.0733		1	153	149	592	0.675676	25.1689	25.8446		0.703		-16.04		23.1049	65.3844	61.9234	12.1051	34.8219	14.6794
3317	3379	WBGene00000521	cky-1			C15C8.2	G5EFL9	G5EFL9	MSTTVPLHASSFSSGTTGAGGGVQQALQLQHCAYHVGASVGSSGSALNNNSINVPNNNTMGMSSAGSSNGSNLVNGQQRSTRGASKQRRDQINVEIQKLRDLLPLSDLIKDRLFQLQVMSLGCIFIRKHRYQQTVLQPQLQMLQMQMSSPMPRGIDICKALRGFMLMVTRSGKILHVSDNASEYLGHSVEEIMCQGDSIYDLVDGRDHGAVQAELASGPPGAATFPEERVFICRLNLARTAKRQLQYHKFVLFQGRYIQPAEFYQQLNAQNSQPDCDQPVFSAYCQPLINPENAEGMSTGNTHVFSTQHYLDMKFKEADTMASQHLGFSKEQLKGMSWYGMIHPNHVPEIAHKHRLLCQEKEGSVLALIRLQAANGEWIWLHTVFSIRPNNELNSDGKR…	676				osc	2.48	81.61	2							P						21.8935		2	362	339	676	3.40237	50.1479	53.5503		0.9621		15.308		85.4188	83.9769	75.0233	91.4616	59.7028	62.7733
9114	9173	WBGene00002021	hsp-17			F52E1.7	Q7JP52, Q20660	Q20660	MDRRFPPFSPFFNHGRRFFDDVDFDRHMIRPYWADQTMLTGHRVGDAIDVVNNDQEYNVSVDVSQFEPEELKVNIVDNQLIIEGKHNEKTDKYGQVERHFVRKYNLPTGVRPEQIKSELSNNGVLTVKYEKNQEQQPKSIPITIVPKRN	149				osc	0.65	68.03	2							P						7.38255		0	16	0	149	10.7383	0	10.7383		0.0049		-20.186		63.1123	52.8519	15.2395	80.7738	49.8624	88.3542
20251	20257	WBGene00008762	ztf-2			F13G3.1	Q19418	Q19418	MNCESLLTALDVSTLLSTLSSPEKEHRRKRRRGEVANPSNTLDALVARKADDQPFEKRYLSEQEAIEGPDDEIEMKKMELDPDVSTRTCSTCGYQGKWVSEMIRHKRVHTSERPFKCRYCSRTSKWKADLIRHVAKTHGIRVVSKYSRSKVFDATNSSMDSSCSSDSDRCIISEKRTVFYRCQLCSFEDERVSVLNSHVSHLHNTSPCVCRCGAKFEDVQGALAHSNGPCSHVDMIYNVMPTYEKASPLSPCRSESSSDSGIQTDPEEEASIITSSLPTPQLGSSPLLLSPTLPVTPSFLPDIQSALLSLQPNPLMSLYLASLLQSSLLNSPTIPTSFPQIIPTTILTPSQQDEMVDVEM	360				osc	1.52	46.25	2							P						27.5		1	360	360	360	0	100	100		0.4328		-13.364		70.5601	60.0197	74.3405	61.3854	31.9725	64.2938
6312	6373	WBGene00018069	F35H10.3			F35H10.3	Q20074	Q20074	MASNSTVFIDDGDFDIVSDQLTKEELEMVKQQIMDTCNALNSA	43				osc	0.77	45.79	2							P						0		0	12	0	43	27.907	0	27.907		0.1567				46.2122	32.9894	11.0391	76.9418	69.5185	81.4419
15247	15268	WBGene00019198	strm-1			H14E04.1	Q9TYP1	Q9TYP1	MSINMNANFLKLLTHFRRHDLTNFKSEHDTLYEKALETGDHLEVTSHYYSVMSTVIDEYFGGNFHFVPPKFEGQKLEEALKSLHCHIAEKLELSENVHCLDIGCGIGGVMLDIADFGAKLTGVTIAPNEAEIGNEKFANMGISDRCKIVAADCQKMPFEDSTFDVAYAIYSLKYIPNLDKVMKEIQRVLKPGGKFIVYDLIKTNDYDKDNKEHYKTLHHLEYACGMPSLHTQSEVEAAAEKWEMPVVERENLEETYGNRAFHYCFSASPMFMWLVSSPVIDHTIRMAEILRILPAGFKQFNRTFLCGTVNSIVGGGRMGILSGADILLFEKKKI	334				osc	1.92	56.76	2							P						0		0	10	0	334	2.99401	0	2.99401		0.01		-21.846		18.7178	19.2041	8.51388	33.1344	48.703	44.1489
10472	10530	WBGene00019751	M03D4.4			M03D4.4	Q21494, Q5TYL4	Q21494	MSSLYLCRDCSGAFHSLDELQRHEREEHETVEQGDQEEDRMEDDSDELAMIKIKIEDSDFLSDTDSSQLSMNPTTPSEKSSSGEKGRYECEDCHEMFAVKRELATHMRIHSGEQPHSCTQCGKEFGTRQLLKKHWMWHTGERSHVCPHCNKAFFQKGHLTQHLMIHSGGRPHECPQCHKTFIFKFDLNRHMKIHQERGFSCQQCGRSFLKQVMLDEHHLKCKGKPSSPIRSLLTPTMKAGLESAISIKPPQESMILSSETIAKMAQKLLIQQQENHRNALNTLLVKQHENILNNNNNNESNILNGSVMHKDAGFEIPAPTIPLSLTCMICKSQFNSQPSFTLHMYMHHIANQNPNLSIDSTHIHHTHQPTTISHQNDPTPLGSDSDLATDTSCASSPQK…	505				osc	1.02	56.48	2							P						12.4752		2	430	397	505	6.53465	78.6139	85.1485		0.4567		-4.506		81.9234	77.3274	82.4687	51.663	31.9725	89.4989
16130	16149	WBGene00020704	T22F7.5			T22F7.5	Q8WQC6	Q8WQC6						osc	1.81	88.66	2							P						8.22511		0	22	0	462	4.7619	0	4.7619		0.8518		-11.562		80.2948	56.5782	69.3785	74.65	31.1054	34.4264
9296	9355	WBGene00002128	inx-6			C36H8.2	Q9U3N4	Q9U3N4	MASQVGAINSVNALISRVFVQPKGDLADRLNSRVTVVILAVSSALLLSSHFIGDPITCWTPAQFNAQWVNFVNQYCFVHGTYFVPLDQQLAFEEEERTKVSIQYYQWVPYVFALQAFLFYIPRFIWKAMIAYSGYDLAAAVKYVDRFWSENRDKDDKFKTRLAAFEGRPSVYIWDGIRLARKKRSRNMALFYTLSTVWQAVNAWIQFYILTQLLDSSIYTLWGPSILGDLLQGNDWQTTGHFPRIVHCDFNRRRPASVQLDTVLCVLTLNIYYEKLFIFLWFWLVFVAVVSTVNCFKWIYYLCNKTKAQKTIKNYLSTAPIKSTISDDQFFSALGEDGLFIMDQMALNLGDIPASYLTISMRNICQDFIESEDYIDEERTPFVKSIKHT	389				osc	0.58	32.12	1							P						7.96915		0	22	0	389	5.65553	0	5.65553		0.0157		-17.78		8.63179	13.5593	1.22083	22.1518	24.8489	25.4557
16785	16797	WBGene00006642	tsp-16			F01E11.4	Q19083	Q19083	MILINNRHVEQKRGQCLKKCLALLLSVLTMIGSGFIVGFGIQTLREVSFTASVIGTNLIVYCPYLLILVGILSFVMTPVRFFSIILNDNKIMITHMFATIFFATICAMTAILGYDLNSHVSSSDMEHWMKHSIKEDYGNPTAPHIMEEWNKAHRQFKCCGVRNLTDFVESKWYIMQKKHPRQRIPDSCCASCATMHERFCVAFFKEPGNQPHQLVKNQTICLQASNGCLSADSSIANREVCQHYSSDYRLSADAYRYTGGCLEPLRTTLEFFSFRIFIYSLSFLAFLALSTLIWLLNYQISREALPFQVIK	311				osc	1.21	20.3	1							P						9.00322		0	13	0	311	4.18006	0	4.18006		0.0871		-13.767		14.9668	9.11078	3.65512	28.4869	35.7775	49.6684
13785	13812	WBGene00008033	spin-2			C39E9.10	Q18545	Q18545	MVNSQQDYISVTALFVVNLLNYVDRYTVAGVLTQVQTYYNISDSLGGLIQTVFLISFMVFSPVCGYLGDRFNRKWIMIIGVGIWLGAVLGSSFVPANHFWLFLVLRSFVGIGEASYSNVAPSLISDMFNGQKRSTVFMIFYFAIPVGSGLGFIVGSNVATLTGHWQWGIRVSAIAGLIVMIALVLFTYEPERGAADKAMGESKDVVVTTNTTYLEDLVILLKTPTLVACTWGYTALVFVSGTLSWWEPTVIQHLTAWHQGLNDTKDLASTDKDRVALYFGAITTAGGLIGVIFGSMLSKWLVAGWGPFRRLQTDRAQPLVAGGGALLAAPFLLIGMIFGDKSLVLLYIMIFFGITFMCFNWGLNIDMLTTVIHPNRRSTAFSYFVLVSHLFGDASGPYL…	488				osc	0.86	23.74	1		1.55005	2.0404	0.00556323	2.39607e-05		P						3.07377		1	53	31	488	4.5082	6.35246	10.8607		0.0713		-13.995		2.7266	1.71702	2.06583	12.4048	25.5859	10.7566
2919	2985	WBGene00008335	C55A6.6			C55A6.6	O17721	O17721	MSPKSVVITGANRGIGLGLVQEFVKDKNILHIIATVRDVEKATDLKAINDPHVHVLPLIVTCDKSIDSFVTKVEEIVGSDGLNLLVNNAGIAVKYLTKTKPNRSMIAEQLDVNTTSVVILTQKLLPLLTRAASKVSGDQLSVSRAAVITISSGLGSITENTTGSAVFDSLAYRMSKAAVNMFGRTLAIDLQDDHILVVNFCPGWVQTDMGGQEAMLTVEQSTSELVSSFNKLDNSHNGRYFQRNLTPFQF	250				osc	1.11	3.88	1							P						0		0	0	0	250	0	0	0		0.017		-16.002		27.2071	31.7367	30.2456	46.2073	38.6441	31.3731
19272	19279	WBGene00013492	Y70C5C.1			Y70C5C.1	G5ED87	G5ED87	MTDANKNVVLERHEFILKGAQDEREYRGLELTNGIRVLLVSDPTTDKSAAALDVNVGHLMDPWELPGLAHFCEHMLFLGTAKYPSENEYFKFLTAHAGRANANTATDHTNYFFEVKPDQLPGALDRFVQFFLSPQFTESATEREVCAVDSEHSNNLNNDAWRFLQVHRSCAKPGHDYGKFGTGNKKTLLEDARKQGIEPRDALLQFHKKWYSSNIMTCCIIGKESLDVLESYLGTFEFAAIDNKKLERQIWKEFPFGPEQLGKRIDVVPIKDTRQISISFPFPDLTGEFLSQPEHYISHLIGHEGHGSLLSELKRLGWVVSLQSGYVVQAAGFGNFQVGIELSTEGLEHVDEIIQLMFNYIGMMQSSGPKQWVHEELAELRAVTFRFKDKEQPMAMASC…	985				osc	1.38	13.4	1							P						1.11675		0	12	0	985	1.21827	0	1.21827		0.0347		-15.638		8.98796	41.2479	68.3272	6.17293	8.02506	11.0563
17052	17062	WBGene00017154	ugt-57			F01E11.1	Q19082	Q19082	MRILILLLGLTQIVTSLNILVFLLGTNQFERNIFEFLAQQLALRHHNVISIKPVLIPEEPRLVKPKLHLVREKVIKNVLNKDLFKPLEDAVPNAAWRSTYDFDNYLEPYYKAHNASCYKLLNSNLVDSLKKESLDLAIVYSGNPCLNALTHLVAVPTIYFDTEGLTDETLIAAGAPIDLLTPPSHCFIAESKGYPILNLYKNSVCYFQEMIAQLGLPAVSSLVSSRHRLLDEPITNIFRTDYTIKKRFKNFPNVNTLKQQSAAYFVNTDPLLEPPRALPLNVIPVGGLHIDHPKPLFSPWNTTIASAKEGLIIVSFGTQADSSKMSEYHAKAILKALTNLNDYRIYWRIGPNMHLDGIDIEKIPKHINLTTFIPQNDLLAHKSCKLFVTNGGMSSVMEA…	558				osc	2.19	38.58	1							P						4.83871		0	30	0	558	5.37634	0	5.37634		0.0105		-16.248		9.73962	26.8902	5.52198	13.633	16.2736	20.3341
7111	7172	WBGene00018732	F53A9.9			F53A9.9	P50439	P50439	MANNYGNAGYNGPTNGPYGNAGYNGANGPYGNNSVHQGQPHTDQNGVPILHYGNGGYNGPQAQYGNAGQNQPSGPFGGAGYTGPTAGTGFGNAGYTPSPPAGVPGNGFVPGGVDVHDDHHHDGHHKKHGRKEHDHHHGHHHGHHHKH	147				osc	0.74	19.16	1							P						67.3469		1	147	147	147	0	100	100		0.9842		28.712		87.411	61.5279	54.2889	96.114	97.9735	96.8632
19537	19544	WBGene00044260	Y87G2A.19			Y87G2A.19	Q56VY4	Q56VY4	MAPSRSHPIPIHRSASHTPSMLVNAKKYLSDRPQLLDCPRCKVHGETELRFVNGFFTYVSFFIILIFGFAILPLFFLWVPFCVETFKDAEHYCPSCRAWIGTYRRLGKST	110				osc	0.88	28.75	1							P						15.4545		0	21	0	110	19.0909	0	19.0909		0.041		-25.454		35.9862	12.2402	9.85753	60.1793	52.2034	90.0442
127	195	WBGene00000035	ace-1			W09B12.1	P38433	P38433	MRNSLLFFIFLPSTILAVDLIHLHDGSPLFGEEVLSQTGKPLTRFQGIPFAEPPVGNLRFKKPKPKQPWRIPLNATTPPNSCIQSEDTYFGDFYGSTMWNANTKLSEDCLYLNVYVPGKVDPNKKLAVMVWVYGGGFWSGTATLDVYDGRILTVEENVILVAMNYRVSIFGFLYMNRPEAPGNMGMWDQLLAMKWVHKNIDLFGGDLSRITLFGESAGAASVSIHMLSPKSAPYFHRAIIQSGSATSPWAIEPRDVALARAVILYNAMKCGNMSLINPDYDRILDCFQRADADALRENEWAPVREFGDFPWVPVVDGDFLLENAQTSLKQGNFKKTQLLAGSNRDESIYFLTYQLPDIFPVADFFTKTDFIKDRQLWIKGVKDLLPRQILKCQLTLAAV…	620				flat	NA	NA			1.91232	1.38953	0.000315418	0.000513914		BWM			SS			0		0	23	0	620	3.70968	0	3.70968		0.0731		-12.381		25.9519	70.2555	3.43896	70.985	51.0366	44.1489
181	249	WBGene00000047	acr-8			ZC504.2	Q23355	Q23355	MNFAFLLRIFVYAGLFFYVNPNRYADQMYEDLLYYYNKNVRPIKNASESVKVKFGSSLIRIIDVDEVNQVLTTNLWLEMQWFDYRLMWDPGRWGKIRKLHVPVDQIWIPDILLYNNADGEPHITIMSDAIVYYNGLVVWKPPSIYKSFCSIDIEYFPYDTQTCWMKFGGWTYNGFLLDVRQLPTTGCEVVNKADDEGEFQFLGRGMDLSGYYPSLEWDLMELNSARHEKIYAGCCGQDFYIDITFKIEIRRKTLFYTINLMIPCTMFAILTSIVFYVPPIEHKMTFSISILVTLTVFYLILIDLVPPTSLVIPLIGKYLLFTMFLVSISIMLSVISLNFYRRDGSSFPMPHWMKVVFIHTLPRYICIKTAEEDDGSDRGSSISDIGPFMDSRRPSPFFI…	540				flat	NA	NA								BWM			SS			5		1	60	44	540	2.96296	8.14815	11.1111		0.0084		-19.053		2.93785	7.76959	0.633751	14.6942	4.20044	24.6622
3030	3096	WBGene00000370	ccg-1			Y73F8A.6	Q9NA39	Q9NA39	MMRSSFFVLLALIALSQAIVRRDASGPTLVLRDNCKIIPAGGCSCDVKEGNDEVVIREYDSVDQCKKSVEMATAENKKDLNEEIKQKYGDFKENCFPKPSGGCKCNVDLGHGEEVAEYSADADCKKSIESVTAEHKKELNEEIKEKFGAFKENCFPKPSGGCKCNEKDANGNEVVTAYNNPDQCKVRGKRDVGATVQRQPANIARANVKDVKQAQPNYDVRDPVRERAQANYAAVVDELKNKFKGLKEGCFPRPKGCLCVIGKTPEGRDITERRMKDVDCKCKEGERGPECPAN	294				flat	NA	NA								BWM			SS			0		0	64	0	294	21.7687	0	21.7687		0.2568		-12.124		65.1928	65.3844	49.9312	37.9735	55.9445	59.7765
3911	3973	WBGene00000822	csq-1			F40E10.3	Q20203	Q20203	MTWIKLASLALVVVLASAGISKNEDLECMFLGYPDLEYDGFDRTEVLTEKNFNRTVFAEDTKSVVFFNDVEEDDSELDQYECFLQLSAQIMTKRGYNFYTVNTTKEHRLRKQEEVEKGEDTIHVYKDGYKIEYNGVRDPETFVSWLMDIPDDPVTIINDEHDLEEFENMDDECVRIIGYFEPGSVALKEFEEAAEDFMGEIEFFAVVTSKWARKVGLKRVGEVQMRRPFEEDPLFAPTSADTEEEFEDWVEKNKEPVMQKLTLDNYFNLWRDPEEEERMILAFVDEETREGRAMKRLLDKIADENSEHAGTLEIILVDPDEFPLMVDVWEDMFGIDIEEGPQIGLIDISEKEGIWFDMSQVNLDDPKKHSDSNFEALQSWIDQILSGSISLDDDDDDEP…	417				flat	NA	NA								BWM			SS			6.71463		0	49	0	417	11.7506	0	11.7506		0.0116		-31.339		34.1464	73.434	59.1575	30.0295	14.3577	63.5004
4425	4487	WBGene00000998	dig-1			K07E12.1	Q09165, Q8MQ08	Q09165	MGGRNWLFRSAVLVSTLLTCISIAQELLPSIEVESLAQDLQIQEWMRTLRRVKRAPTRNNRPEPVVVGRNGTGKCVISADRASHFCGMEEEVSAPPIPPPDEGKCIISKASGREICYPSYSQLDTSCTDVTGQSSNGLVVPPVVPHATVRAMAFVPPDNLRRLIIQYYRQQGKHQPKNATFSPKSFLFVKYHCDYGYEMVDEVDTMFCQDKKWVMTPPMCRGQGLCAADNGGCSHTCISYNDEKIECKCPRGMTLDVDEKTCIKPIPKSLCRSLSGCTCNGITETQFACSCGDNKQKCLLIAGPPRIYIEPQGPYEVAPGGNINISCTSVAYPFPDIYWFKNQKVNTDGPDQNTLRASQILIIKEIYRNEEFTCVSDNIHGSANRTVSIVVTGPGSAPH…	13100				flat	NA	NA								BWM			SS			1.61633		25	4192	3737	13100	3.47328	28.5267	32		0.8023		-8.677		99.941	99.9951	99.9853	0.186686	0.0049128	0.471629
4621	4683	WBGene00001113	dur-1			F25H8.5	D3YT34, H9G2U2, H9G2T9, H9G2U3, H9G2T6, Q95ZV0, A0A061ACN9, H9G2U0, H9G2U7, H9G2T7, H9G2U4, H9G2U1, Q7JLY3, Q19790, H9G2T8, D3YT33, H9G2U5, Q7JLY2, H9G2U6	H9G2U2	MRTLFILVSLCAALCFSAPVSEQDLRVRRNAEEAAHSGAEAVAEKHTLRVAARLETQNDRLKRQQSAEERARAEADARRRERCRNRRPQPTPGPPPPRNNCLPPPGPPPPCQQYQQPQPPPCQRPQPPQPQPQPYPQRTGGCLPSPRGYENQPQPPQPQQQQYPQPQPQRGGCTYSQPQPQPQQQPQPPCYQRQPEPPRQTGGCLPGPYYSPNTMAPPQHQQPYPERNGGGCRQRSPQPQYPRTNEFRAPVVECHGNGPAPCNPQPQQEDPCVGKVNIVSVDAAGKVDHYLYETKKQSGDVIGEASNKVSETAEQGAHWTGDRAREAGNTLSNAAHDGYEQGRDGVADMRERIDEAGHEVAEAAEEGSNTVGQKTGKAIDSAVDKAEDVAEGTKNRAEK…	780				flat	NA	NA								BWM			SS			35.1282		3	604	581	798	2.88221	72.807	75.6892		0.9946		27.563		87.411	95.4041	75.888	11.2822	99.4154	3.6846
4879	4941	WBGene00001263	emb-9			K04H4.1	P17139	P17139	MSRLSLLGLTAAVVLLSSFCQDRIHVDAAAACKGCAPPCVCPGTKGERGNPGFGGEPGHPGAPGQDGPEGAPGAPGMFGAEGDFGDMGSKGARGDRGLPGSPGHPGLQGLDGLPGLKGEEGIPGCNGTDGFPGMPGLAGPPGQSGQNGNPGRPGLSGPPGEGGVNSQGRKGVKGESGRSGVPGLPGNSGYPGLKGAKGDPGPYGLPGFPGVSGLKGRMGVRTSGVKGEKGLPGPPGPPGQPGSYPWASKPIEMEVLQGPVGPAGVKGEKGRDGPVGPPGMLGLDGPPGYPGLKGQKGDLGDAGQRGKRGKDGVPGNYGEKGSQGEQGLGGTPGYPGTKGGAGEPGYPGRPGFEGDCGPEGPLGEGTGEAGPHGAQGFDGVQGGKGLPGHDGLPGPVGPR…	1759				flat	NA	NA								BWM			SS			30.1598		1	1264	1261	1502	0.199734	83.9547	84.1545		0.9219		8.557		99.9509	98.7055	99.4571	99.9853	99.9803	100
4923	4985	WBGene00001328	epi-1			K08C7.3	Q21313, C1P640, A0A061AD21, A0A061AJI9, C1P641, G5EEV6	Q21313	MSPYDSSPWATKALFLIVTLLAQFTYSQVLTPSQITISHRKPITATSTCGEIQGQPVTEIYCSLTGSTQYTPLNSYSYQDDEQQKSWSQYENPMVRGGHGCGHCNAGNENSHPAANMVDGNNSWWMSPPLSRGLQHNEVNITIDLEQEFHVAYVWIQMANSPRPGSWVLERSTDHGKTYQPWFNFAENAAECMRRFGMESLSPISEDDSVTCRTDMASLQPLENAEMVIRILEHRPSSRQFATSEALQNFTRATNVRLRLLGTRTLQGHLMDMNEWRDPTVTRRYFYAIKEIMIGGRCVCNGHAVTCDILEPQRPKSLLCRCEHNTCGDMCERCCPGFVQKQWQAATAHNNFTCEACNCFGRSNECEYDAEVDLNKQSIDSQGNYEGGGVCKNCRENTE…	3704				flat	NA	NA								BWM			SS			3.7257		1	62	45	3672	0.462963	1.22549	1.68845		0.5759		1.329		93.6256	98.9732	98.6834	1.73913	1.72439	0.466716
7688	7749	WBGene00001385	far-1			F02A9.2	P34382, G1K0V6	P34382	MIRATIILAAVAALAFSAPVPEVPENYDDIPAEYKSLIPAEVSEHLKSITPEEKAILKEVAKGYKDFKSEDDFLNALKEKSPTLHEKASKLHQIVKDKVNALNDEAKAFVKKAIAEGRKIHAQYLAGEKPSLDTLKTTAKTHIEAYKGLSQDAKDSIAKEFPILTGFFKNEKVQAMVGQYLN	182				flat	NA	NA								BWM			SS			9.89011		0	6	0	182	3.2967	0	3.2967		0.0731		-29.582		31.3952	44.6156	11.0391	28.4869	76.4849	54.0604
7689	7750	WBGene00001386	far-2			F02A9.3	P34383	P34383	MIRAFLVVALASVAVFSAPIPEVPQNFDDIPAEYKGLIPAEVAEHLKAITAEEKAALKELAQNHKEYKTEEEFKAALKEKSPSLYEKAGKLEALLTAKFEKLDATAQALVKKIIAKGRELHQQYLAGDKPTLDSLKELAKGYIAEYKALSDDAKATITAEFPILTGFFQNEKIQAIVGQYVN	182				flat	NA	NA								BWM			SS			17.033		0	14	0	182	7.69231	0	7.69231		0.0028		-29.133		25.5785	44.6156	5.25424	30.8057	81.5181	54.0604
7693	7754	WBGene00001390	far-6			W02A2.2	Q9XUB7	Q9XUB7	MIRIFLVIALASVAVFSAPISRLPQSLDDIPAEFKELIPAKVTEYLKSITTEEKAAIKEFIKSVMGGNKSVEELSADIKERSPSLYAKVEKLDVLLRTKLAKLDPAALALFGKVIAQGLSFRQQFHAGYQPTPEMVKKLFKGYIAEYKTLSENAKATITDEFPIVVEFFQHEKIQAIIQQIVNY	184				flat	NA	NA								BWM			SS			6.52174		0	14	0	184	7.6087	0	7.6087		0.003		-26.746		25.5785	26.8902	13.0115	30.0295	48.703	51.5033
8898	8957	WBGene00001863	him-4			F15G9.4	G5EG33, A4UVK0, G5EDG4, G5ED27	G5EDG4	MGRSPSWLYGVLGLLLLATTCSSVNDDKNDPTGKSSLAFVFDITGSMFDDLVQVREGAAKIFKTVMAQREKLIYNYIMVPFHDPYLGEIINTTDSTYFMRQLSKVYVHGGGDCPEKTLTGILKALQISLPSSFIYVFTDARSKDYHLEDEVLNTIQEKQSSVVFVMTGDCGNRTHPGFRTYEKIAAASFGQVFHLEKSDVSTVLEYVRHAVKQKKVHLMYEARERGGTVSRNIPVDKHLSELTISLSGDKDDSDNLDIVLRDPEGRTVDKRLYSKEGGTIDLKNVKLIRLKDPSPGVWTVNTNSRLKHTIRVFGHGAVDFKYGFASRPLDRIELARPRPVLNQDTYLLINMTGLIPPGTVGEIDLVDYHGHSLYKAVASPHRTNPNMYFAGPFVPPKGL…	5175				flat	NA	NA								BWM			SS			2.43478		1	32	32	5175	0	0.618357	0.618357		0.7503		-6.465		0.36846	98.2928	96.0673	0.103169	0.0294768	0.073692
9256	9315	WBGene00002110	ins-27			ZC334.11	Q7JKM7	Q7JKM7	MKFFRLILLCALVLTTMAFLAPSTAAKRRCGRRLIPYVYSICGGPCENGDIIIEHCFSGTTPTIAEVQKACCPELSEDPTFSS	83				flat	NA	NA								BWM			SS			0		0	33	0	83	39.759	0	39.759		0.0147		-32.46		38.988	13.5593	10.4274	73.4169	62.5817	79.8772
10082	10140	WBGene00002247	lam-1			W03F8.5	V6CIX7, O44565	O44565	MLRPPFWLGLLLSLLLVFIEAQHPLQQNEDRCQDRSCYPITGNLLIGRKSQLKATSTCGSQGRQRFCIVSHLEEQTKCFYCDSRTEWKPQREPYRLSHRIENVVTEVMDDKNRNWYQSENGAQNVSISFDLEAEFHFTHLIMTFKSFRPAAMIIERSADFGKTWQVYRYFAYDCDSSFPGIPEGPPKKHTDVICTSQYSDVAPSTGGEIVYKVISPHIVTENPYADEISTLLKITNLRFNFTKLHTLGDDLLDYRPEIDEKYYYAIYEIVVRGSCSCYGHASRCIPIDPHVSPNTVMERADIVHGRCECMHNTEGLNCEKCKAFYNDLPWRPAIGDEKNECRQCNCNRHALRCHFDRAVYESSGFVSGGVCDDCMHNTQGKNCEQCKPFFYRDPRRTID…	1790				flat	NA	NA								BWM			SS			5.86592		0	27	0	1790	1.50838	0	1.50838		0.4197		-12.468		59.2582	93.0779	85.4213	25.8069	80.3144	1.94547
10094	10152	WBGene00002254	lbp-2			F40F4.2	Q20224	Q20224	MSSKFLILLAFCGATLVAAEQLPEKFYGTFDLDHSENFDEYLTAKGYGWFTRKLVTFATFKKVFAKNANKNLFDYSNLTSKKDVFYKNVQIGSKFEGEGLDNTKHEVTFTLKDGHLFEHHKPLEEGESKEETYEYYFDGDFLIQKMSFNNIEGRRFYKRLP	161				flat	NA	NA								BWM			SS			18.6335		0	13	0	161	8.07453	0	8.07453		0.0061		-27.09		49.8428	43.4169	21.5328	46.2073	64.0334	92.9821
10095	10153	WBGene00002255	lbp-3			F40F4.4	Q20222, Q27GU2	Q20222	MNLYLTLFSFCFLAIMAEAASEIPEKFFGKYDLDRSENFDEFLAAKGVSWFVRQMIKLAKVSKVLAKNETPGKYNMENLTSKKNTLYHGWELGKTFEAEGLDGVAHKITFSFKDGVLSEHHIRLNDPEHSAETYYYTIENDQLVMKMVNNGITCRRWFKRSTGKK	165				flat	NA	NA								BWM			SS			0		0	21	0	165	12.7273	0	12.7273		0.0119		-30.157		36.2	31.7367	12.3164	44.1562	72.2771	76.8558
10113	10171	WBGene00002268	lec-5			ZK1248.16	G5EFI4	G5EFI4	MITRTIVCLSLAALVSCQGDASDPKETNYKKFIGEQEYKLPFKTRVSEPLAVGQTIHAVGTLSEKPTRVDFNFHKGSAKDADLPLHFSIRFNEGLLGSGKLIYNTFENGNWSEDEQRISNPFKAGQEFDLRVRILEGKFQVFANRLEVGVFTQRLPLDGIDHVSIRGDLSKLRLFHYGGRIFPNPYMAVAGLTPGKRLDISALPKGKRVNVNLYRENKEYALQVSIRYNEGAVVRNAMTSNVWGKEEREGKMPLDKKQVFDITIINEEYSFQIFLNNERFTTFSHRGSPSDIKTLEIDGDVEIQTVTINDAPGV	314				flat	NA	NA								BWM			SS			0		0	3	0	314	0.955414	0	0.955414		0.0063		-16.541		38.4083	43.4169	31.1815	47.2366	31.9725	52.7733
10123	10181	WBGene00002280	let-2			F01G12.5	P17140	P17140	MKQRAALGPVLRLAILALLAVSYVQSQATCRDCSNRGCFCVGEKGSMGAPGPQGPPGTQGIRGFPGPEGLAGPKGLKGAQGPPGPVGIKGDRGAVGVPGFPGNDGGNGRPGEPGPPGAPGWDGCNGTDGAPGIPGRPGPPGMPGFPGPPGMDGLKGEPAIGYAGAPGEKGDGGMPGMPGLPGPSGRDGYPGEKGDRGDTGNAGPRGPPGEAGSPGNPGIGSIGPKGDPGDLGSVGPPGPPGPREFTGSGSIVGPRGNPGEKGDKGEPGEGGQRGYPGNGGLSGQPGLPGMKGEKGLSGPAGPRGKEGRPGNAGPPGFKGDRGLDGLGGIPGLPGQKGEAGYPGRDGPKGNSGPPGPPGGGTFNDGAPGPPGLPGRPGNPGPPGTDGYPGAPGPAGPIGN…	1758				flat	NA	NA								BWM			SS			46.4164		1	1526	1522	1758	0.227531	86.5757	86.8032		0.9523		10.038		99.9509	98.3247	99.5382	99.9902	99.9509	100
10125	10183	WBGene00002497	let-268			F52H3.1	Q20679	Q20679	MRVLPFLLPLIPVLLATTITDLPELVVVTVATENTDGLKRLLESAKAFDINIEVLGLGEKWNGGDTRIEQGGGQKIRILSDWIEKYKDASDTMIMFVDAYDVVFNADSTTILRKFFEHYSEKRLLFGAEPFCWPDQSLAPEYPIVEFGKRFLNSGLFMGYGPEMHKILKLKSVEDKDDDQLYYTMIYLDEKLRKELNMDLDSMSKIFQNLNGVIEDVELQFKEDGTPEAYNAAYNTKPLIVHGNGPSKSHLNYLGNYLGNRWNSQLGCRTCGLEVKESEEVPLIALNLFISKPIPFIEEVLQKIAEFDYPKEKIALYIYNNQPFSIKNIQDFLQKHGKSYYTKRVINGVTEIGDREARNEAIEWNKARNVEFAFLMDGDAYFSEPKVIKDLIQYSKTYD…	730				flat	NA	NA								BWM			SS			1.78082		0	20	0	730	2.73973	0	2.73973		0.1841		-11.532		5.95922	35.5072	0.147384	11.2822	13.9204	17.8507
10157	10215	WBGene00002974	lev-1			F09E8.7	Q27218, C6KRN0	Q27218	MMLGGGGGCGAGGTWLGFLVFLAVSLRNHSTCEDIDAEDRLMVDLFRGYNSLVQPVRNRSELPMIVKIGMQLVLLINVDEKEQVMHTNVWLTMKWDDFQLKWDPRDYANITQIRVAPEKVWLPDIVLFNNADGNYEVSFMCNVLILSTGTVLWVPPAIYKSSCIIDVEFFPFDDQLCSLTFGSWTYNRDEIKLDFLTSDRVDFSEYSTSSIWDMMDGPAVLTSDRSRIEFQIRIRRKTLFYTVVLILPTVLMAFLNVTVFYLPTASGEKMGLTMNVLLSIVVFLLLVSKILPPTSSSIPLVAKYLLLTFVLNIITIMVTTIICNIYFRSPITHRLPPWVRKVFLDILPLLMCMQRPHRKNVIQRSHRRLLETGPSVEENPMRSGEHHPLCRHTHNQDSC…	507				flat	NA	NA								BWM			SS			5.12821		1	81	54	482	5.60166	11.2033	16.805		0.003		-23.944		6.33997	6.33505	8.91427	32.3753	5.61287	29.3908
10160	10218	WBGene00002975	lev-8			C35C5.5	Q93329	Q93329	MWIPQRISHIFLLVIFILHIVTINANKHVSQLLENLLTDYNKAVRPVHNASDALKVKFGANLCRLIDVDEVNQVLTTSLWLEMQWYDKKLTWNPTDWGGVEYIHIPSDQIWIPDIVLYNNADGEPHITITSLAKIDHHGRVVWQPPSIYKSFCPINIKYFPYDWQTCEMKFGGWSNDGETLDLYQIPVDVDDIPQVKRQDDGVEFLYLEKGLGLSFYHESAEWDLLSATSSRYAQIYPGCCGQQYYIDIKYRIIIRRKAIFFTVTLTIPCMLIANVTPFVFLILPNEHKMTYSISVLVAFSVFYLVLIDLIPPTSLSLSLIGIYLLFTLLMVSVSIILSVVTINMYRKQAFSSGMSHWQRWLFVQRLPKLLRLKTLEHTLGPDEGSETTTPRTGSVSVT…	531				flat	NA	NA								BWM			SS			11.2994		1	94	62	531	6.02637	11.6761	17.7024		0.0263		-16.742		7.36674	12.6701	1.50332	19.1059	6.71088	29.3908
10786	10844	WBGene00003169	mec-5			E03G2.3	G5EFQ9	G5EFQ9	MRLLILLLLTISSIYCALDTAAVIAIQTEINKHSADIEMILDHVKNLNARVSDLGRPGPPGTNGSPGFPGSKGEKGDRSEDGMSGRDGMQGIPGVKGDMGPLGPTGMKGDKGSMGFPGQKGEGGNSGIPGLKGDTGIPGKVGEPGSTGQPGSKGEKGMEGLPGTNGLPGAPGWPGSKGEDGLPGRPGSPGFPGKKGDVGNGGVPGVPGMIGERGLPGAPGAQGMMGPIGPPGQLGLPGPKGDLGSAGLPGSKGEMGKDGIPGLPGWIVNDKGYCILALGNCPPAFTQIGAYQAHVDNYRFGDYSLVKSSGIGGNEEQFALKVHACCR	327				flat	NA	NA								BWM			SS			18.9602		1	327	327	327	0	100	100		0.3936		-3.857		95.8069	59.1697	73.7927	99.268	97.772	98.9241
11734	11778	WBGene00003812	nrf-5			F55B12.5	Q93796	Q93796	MSRNFHIFFLLVSIIQVGNSADSSEITHKPAGIYVRLNQKAVDYVADLASDALPAILNNLSPPDIVTDMAKITKLHISNVAKPNLSAKFIDGKGVAYNISLASFRASAYAEISVFVWSYEGDFTAELRELSIESELHFDYNGTTTVNASVCNVTHSELSLVFPPGSSLSALQSEIKGQIVSALRDAVCTTAVEALTFVMAQKPIPPESPNYQKPEAGDPNGFSVAELGASLCQVDTVNGFEDSEQEEGNVETTVAPTPDDDNSTLTTEETQKSYWGVDLSVNHPPTFTDEDMIIGLDGGILFNGWKADSAQQLQILNKTRLDKKMVGILLSEYIPNTLFHHIYMYDLGNFKHRYTPSSLPKILQKLSKAVCSKCYVEVSANLTEQPILQIDAHLGARVQ…	551				flat	NA	NA								BWM			SS			0		0	63	0	551	11.4338	0	11.4338		0.0238		-20.604		24.93	69.7396	43.1516	24.6401	20.8401	23.5225
11961	12005	WBGene00003893	ost-1			C44B12.2	P34714, U4PF73	P34714	MRYALAACLLLLAASSFVDAKKKKIADDELGELLDNIDADEEKKSVEPAKNPCEDHQCGWGKECVVGKKGEPTCECISKCPELDGDPMDKVCANNNQTFTSLCDLYRERCLCKRKSKECSKAFNAKVHLEYLGECKKLDECTEEHMAQFPERMADWLFQVMKELKKRRELHKLEWEELLSEAENDDEKKHVYPVIWKFCELDTKPHDKSVSHHELIPITAPVIPMESCIKPFLEGCDANNDGNISIKEWGKCLGLKEGEIQERC	264				flat	NA	NA								BWM			SS			10.9848		1	48	48	264	0	18.1818	18.1818		0.5951		-40.24		56.48	50.8622	54.2889	43.2302	62.5817	76.8558
12034	12078	WBGene00003929	pat-2			F54F2.1	P34446	P34446	MREGSFPRRIGLLLGLLGLLAGVATFNIDTKNVVVHHMAGNYFGYSLDFYHEQKGMPVLVVGAPEAESNNPNLAGIRRPGAVYACSVNRATCREVHVDKMKGNLKKLNGSHLVPIEEKSHQFFGATVRSNDKHDKIVVCAPKYTYFYSKFEVIEPVGTCFYAENGFDNAEEFSSCKQEPARHGRHRLGYGQCGFSAAVPGKKNQNRVFIGAPGVWYWQGAMFSQNIKNQTDRPNTEYGSKEYDHDMMGYSTATGDFDGDGIDDIVAGVPRGNDLHGKLVLYTSKLKMMINLTDEVSTQHGQYCGGSVAVADVNKDGRDDIIMGCPFYTDYGSVKDAKTQERKPQYDVGKVIVMLQTAPGVFGKQIAVVGDDQWGRFGHAVAAAGDLNLDGYNDVIVGAP…	1226				flat	NA	NA								BWM			SS			11.1746		3	175	155	1226	1.63132	12.6427	14.2741		0.2725		-5.854		83.7829	92.9305	82.1027	22.8101	8.46475	10.3439
12035	12079	WBGene00003930	pat-3			ZK1058.2	Q27874	Q27874	MPPSTSLLLLAALLPFALPASDWKTGEVTGKVVEKSEFPCYSLSRDNYTCSACIQYHESCAWCGAPMFDEKKPYARCDSRAKLMEHGCPNSYIEDPATKLDITEDSKLSDQGQVESEEEAVQIKPQEMYVEIRPKSRVRFNVTYRQAVDYPVDLYYLMDLSYSMKDDKQKLSELGDLLAERMRTVTKNFRLGFGSFIDKKLMPFIDPRIEKQLSPCPTPCAEPYGFKHQMSLTTNTAKFKAEVDKAEISGNLDAPEGGFDAVVQALACNKTIGWRERARKMIVFSTDAGFHFAGDGRLAGVVEPNDGTCHLDREGYYTETLNQDYPSIALLHQMIKDRKANVIFAVTKNNQDLYTQLSNALPDVSSSVGVLANDSRNIVDLIEKEYLKISEKIIMVDNA…	809				flat	NA	NA								BWM			SS			6.05686		0	30	0	809	3.70828	0	3.70828		0.3385		-15.749		24.6844	73.434	66.7281	22.1518	13.1491	14.1145
12321	12351	WBGene00004113	pqn-24			D1007.14	O01876	O01876	MLKLLITVGLAVGTVYSLTCYNGSKTLAFQSVGETTEECPESSYCYNMSTSAMVMVNFVKAGCSRWRCMLAKDTCIFTTFQMVPVSLCCCSYDRCNVGGNPVYSDNPKQIQNGGGNSGNWNSGGNNNGASGGSWGNGNANNNNNNNNGGSNNNGWGNNNDWSSNYNYGGSNAANEPKMTKQTVAGDDSWNKNKWTNKQVEDMFKKSIDDRGDEIQLEDDFKKIDKNYKTQSVPQESLRTLSARKEVEKIPFVAGKSSGVGAKTTASPTTGKSKEIQL	277				flat	NA	NA								BWM			SS			22.7437		2	170	149	277	7.58123	53.7906	61.3718		0.8553		38.114		79.7986	69.2213	51.7416	79.0494	97.2537	49.6684
12333	12362	WBGene00004129	pqn-42			F53G2.4	H2L066, A9D602, H2L065	H2L066	MLLILLLIPQLFALSPLQPCSQSPSITFRGANDVTRAGGTPALFVFAPLQCANCYNFLRRLNDLAASRAYRIHVVAPDFESNHIIQRTSSAFPNLQIDRAGEGWPRLGAQNFDAFVLDGCSRVTDTYQWPQSDVVTSPDIQNALNSATSSKCNNGGARCQMTSPAAASKKRVNAWLKEQQEAAAEQQRRAQTQMPRHQQQYQAPQQQQQNYHQNSQNPYQQPNYQQNQYQPQLQQFQQNPRQQQHVYSNPQQGYQQNYQNLYTPPPAQQAPIPTEKVTTTTTATDYDYYPNENEDAAVTTTPSTQTQIPRPPSHGSAWPTFPPHQQWTPQGYPYGYQQNPNSPPNPALMMDANLPCSAFTDDICHQQREQMGSLVSKCCNKGIYLTDVCIPGKCSNSTT…	525				flat	NA	NA								BWM			SS			25.7143		1	66	61	157	3.18471	38.8535	42.0382		0.9919		51.892		74.7015	89.2287	43.9032	62.5522	47.5215	49.0346
12335	12364	WBGene00004135	pqn-48			K07D4.8	O76576	O76576	MKNPAIQFSLLLVLGVAVQNTESQYRQHQPSYPQNYQNHNYNAHQQHYHQQQQQQQHAHQQKQASQQQQQQQYPYNNYPSPNAIKAYQAAYPSVPHASVFNQPTHQICDIPPDLWCDSPQSAQQCGVQRQCDGLRHRRQPIKITLIYEALCPYCQKFIANQLGSVFNQFQGQLILELVPWGNSRIMRDGSFSCNHGQKECDANRLQSCVIDILKVKGALPFIVCFERNIQHYGVEHAMQTCSAFIRSQYRQIRQCYDGPRGVQLQREAAQKTMSTRPNPILEVPYLLINDYTPSVDMNNLNVMLLPQLLAKWTKLTHKQ	319				flat	NA	NA								BWM			SS			16.9279		1	81	77	319	1.25392	24.1379	25.3918		0.1857		44.288		71.6974	73.8172	44.6131	69.6536	73.6699	65.9175
12485	12514	WBGene00004249	pvf-1			Y39A3CL.6	Q9N413	Q9N413	MQNPMILLIFCLFCAVICSRGTDSDIPHEFHKMLKHAKSLNSLLRDLHVIYSPEMTNRHVEKTDKHGAALSLKSGSMSAQRIVSIQNISDDEMDGYTLFHLQSMKDIKQGNDTCNLQSVCVPIPQLSDDPQVLMYPKCYEVKQCVGSCCNSVETCHPGTINLVKKHVAELLYIGNGRFMFNMTKEITMEEHTSCSCFDCGSNTPQCAPGFVVGRSCTCECANKEERNNCVGNATWNAETCKCECDLKCEEGKILHKDRCDCVRRRQHHGGPRGHHGHRHHHRSRPIDTEEVQKIGQLKVGRIGG	304				flat	NA	NA								BWM			SS			7.23684		2	100	80	304	6.57895	26.3158	32.8947		0.6905		-17.027		69.0666	34.2913	53.0386	83.3579	39.6782	79.8772
13794	13821	WBGene00004995	spp-10			C28C12.7	Q4JFH6, Q18276	Q18276	MKYFILTLAVLGSTLAYSKQNMLDTNRVQAEVIENSSCEECENVIKRISEAAKDPKKIEELKIVLGMMCRETSYADECRLFVSQLDKFIDKLQPFLKNPHAVCTRLHICSNKKIDSFRRILLEFAKRAQKTFDAPAIVCDECQFVVKELKTVVEDKKSQAEARDFLRENVCKSLGQYRGFCDLVVDEYLPQFIQELDAILQDPHQVCVDIKACNSASAQGLKARKYVGILGYFQRHFL	238				flat	NA	NA								BWM			SS			0		1	32	32	238	0	13.4454	13.4454		0.0036		-25.82		20.9678	19.2041	10.4274	32.3753	55.9445	44.8514
13799	13826	WBGene00005000	spp-15			C48E7.10	Q9BIC4	Q9BIC4	MNYLILLAFLAITLTVSNVEGAKKMHSDTSKPLCGLCVNVVKQLDQVLEHGGDIEAAVDKFCKEDVPSFMVDMCEKVIEKNLEYIINKLKDHEEADKICTDILLCRTPKQYYFLETQK	118				flat	NA	NA								BWM			SS			10.1695		0	38	0	118	32.2034	0	32.2034		0.0107		-36.916		33.5937	19.2041	14.4461	60.1793	61.1373	73.5986
15282	15303	WBGene00006318	sup-9			F34D6.3	O17185	O17185	MKRQNIRTLSLIVCTLTYLLVGAAVFDALETENEILQRKLVQRVREKLKTKYNMSNADYEILEATIVKSVPHKAGYQWKFSGAFYFATTVITTIGYGHSTPMTDAGKVFCMLYALAGIPLGLIMFQSIGERMNTFAAKLLRFIRRAAGKQPIVTSSDLIIFCTGWGGLLIFGGAFMFSSYENWTYFDAVYYCFVTLTTIGFGDYVALQKRGSLQTQPEYVFFSLVFILFGLTVISAAMNLLVLRFLTMNTEDERRDEQEAILAAQGLVRVGDPTADDDFGRLPLSDNVSLASCSCYQLPDEKLRHRHRKHTEPHGGPPTFSGMTTRPKY	329				flat	NA	NA								BWM			SS			0		0	63	0	329	19.1489	0	19.1489		0.0054		-18.042		15.4114	9.11078	16.0919	36.2024	47.5215	33.8909
11578	11622	WBGene00006412	nlg-1			C40C9.5	Q9XTG1, G5EED7, A0A0K3AVG1, G5ECG6, A0A0K3AVK6, A0A0K3AT91, G5EFY3, A0A0K3AT61	Q9XTG1	MERIYLLLLLFLPRIRSYDVRSVTTSWGMVRGEVVSPEGDDLPPVAQYLGIPYGVAPTGQYRFNMAISAAKWTHMPKDARKVSPVCIQTDMPELSETKAFKHTSAQRFDFNHRLLPHLKKQSEDCLYMNIYVPERLEISRDNYLPVMVIVHGEEYGWGTGNAFNGTTLAAYGHIIVVTLNYRLGVFGFLGRCESSSCSGNSGISDLVSALTMLNVILPSFGGDSKSVTLAGWGSGASLVSLLMASPLTQPGRRLFRRAILLDGSALSPWAISQNPQQYFMQLAEELACAPKNRTSSFNDNVDTIVRCMQVHSSENITKAVLKIDVPTFLSGFAPIVDGQLIPNKPQVSFSTQYGSLFREIDLLVGISSNPSHHMISNEDLKVGISKEKRMRIFRSLVRN…	798				flat	NA	NA								BWM			SS			5.76441		2	217	191	798	3.25815	23.9348	27.193		0.8139		1.294		71.012	79.7814	70.4569	78.0226	22.7684	25.8806
8863	8922	WBGene00006452	heh-1			R148.6	O17271	O17271	MKTVIFLALLGLAAAEFIEIGYKVCKSDGTVSQVKADGCELTVKDGKKVCLFKKGSRPIIQIAFKPSKDTDKLKTSVRAKVGGSAMVDFPQTNSDACTYGVKCPVSAGENQIFEQSISITENHPAGEVIQVNWQLTRPDSGKEVCIIFLAEIKE	154				flat	NA	NA								BWM			SS			5.84416		0	9	0	154	5.84416	0	5.84416		0.01		-16.746		43.8369	23.1565	24.4436	42.3409	66.5979	65.1363
17104	17114	WBGene00006765	unc-29			T08G11.5	P48181	P48181	MRTNRLSWILVLSVVIFLVIINTINASDDEERLMVDVFRGYNSLIQPVRNSSELPLIVKMALQLVLLINVDEKDQVMHTNVWLTLQWHDFQMKWNPVNYGEIKQIRVSPDKVWLPDIVLFNNADGNYEVSFMCNVVINHKGDMLWVPPAIYKSSCIIDVEFFPFDEQVCTLVFGSWTYNENEIKLEFVQAELVDVSEYSASSIWDVIDVPASLVNKRSRIEFQVRIRRKTLFYTVVLIIPTVLMAFLSMAVFFLPTDSGEKITLTISVLLSIVVFLLLVSKILPPTSSTIPLMAKYLLLTFVLNVITILVTVIIINVYFRGPRTHRMPQWVRVVFLQFLPKLVCMKRPKSASERSAVRSGMAQLPGVGQFTLSPSAHHPLCPSADDRTTTIRNTASNET…	493				flat	NA	NA								BWM			SS			12.1704		1	78	51	493	5.47667	10.3448	15.8215		0.0036		-14.346		4.81454	8.16753	2.55711	21.4665	5.61287	16.5586
13792	13819	WBGene00006893	spon-1			F10E7.4	Q19305	Q19305	MLRFVAILQFILLLLLIFSCNADEAKCTIKPYEAKGDKSPGSNGYVIEINGTTTKSMDISKGFVPGEIYKVSIRGWRTQYTVKTFRGFVVSSLFEDNTSAGSWQVVKGHGDARISPGCRQSGVSHANLKSKTSVHMMWKAPEVSSGCVVFRASVIETKYIWFTEAEGLTVKLCIQKGTQILKPVDDPSATCCACDIAQYDLEFTGIWSKNTHPKDYPTLEHLTHFTDMLGSSHSSNYSLWTIGGISTDGMKEIAEWGNTYKAEAEAKAKASEVRSLMKVKGLWFPDVQGTTKSQFVVNKYHHFVSLATMFGPSPDWCVGLSSVNLCLPDCTWAEERTFELQPFDAGTDSGPTYMSPNEPTEPREPIHWITTKLNPLSPFYNSKSDTIPTLAKVILRRKN…	819				flat	NA	NA								BWM			SS			4.0293		0	85	0	819	10.3785	0	10.3785		0.3158		-19.112		78.31	56.5782	76.927	33.9008	18.4205	31.857
19782	19789	WBGene00006983	zig-6			T03G11.8	Q22125	Q22125	MTKLCLLLLPLVFLVSYSFAEEEITISISPNANPVQKPIGHQISLVCSIKKTDSNGEKPGMIWKKHGGLDRTGNVEVKKLDDYTLGLIIRNSSVEDSGVYYCQAQVGSKVYMNKMDVIVFEDIVFRDKQLHFGQVLATASVNISCEVSAKKDSVITYWTRHGKQILEGGKHKFYSRGSILEIQNYQPEQDAGQYTCEVFHVSSGSSNTKTVTLGTTGEKNYVACQQMCNSFCTDVHNKVFTNN	243				flat	NA	NA								BWM			SS			4.52675		0	3	0	243	1.23457	0	1.23457		0.0038		-12.109		44.0948	31.7367	34.7237	44.1562	54.7015	49.6684
19783	19790	WBGene00006984	zig-7			F54D7.4	O44730	O44730	MKLINCISIALLCTLVDFSSAEITVISNLAVVGSPESHVGTPNKTLYANIQNLWCGAQNLGEHIDVEYGEFTRLSDGKVFKGTVNQGKVYLEIGKASVKVAGRYRCEVRTLDKEIHSGNLIIYMPPVLDFPAAVRVSEVLNARPPHVIGAERRGLHGERMVLECPVLANPEPMVRWEKNGEPLGNSDSIEYDGNNLILNSLTEDHIGKYRCIGDNSFPLFVDGPAIPHQIYFDQDIKVL	239				flat	NA	NA								BWM			SS			0		0	0	0	239	0	0	0		0.0064		-20.318		39.3761	37.8728	19.7494	58.9732	41.8718	52.1322
1330	1397	WBGene00007419	C07E3.9			C07E3.9	Q17790	Q17790	MNFILLVFLAALSTTCYCTNPRLKALWNLEEVAECELHYNALHYNNYGCWCGIGGSHEPVDGIDECCMHHDKCYDAAVDNKVCMDVEIEYVDDYSWSCMNSTAICSDKNMGCKAALCDCDKIVVECWKKFPKPEKKAKCNRTLWAPITKHFQH	153				flat	NA	NA								BWM			SS			7.18954		0	24	0	153	15.6863	0	15.6863		0.0127		-32.329		34.5247	29.2533	9.85753	56.5291	81.5181	65.1363
1530	1597	WBGene00007551	C13C4.7			C13C4.7	Q7YTR4	Q7YTR4	MFHSFLIYCLLVTIVFAQFSPTNETVVHHDGRLWDVVIETCDKDGAGTDAASYLKVFYESGHDSETFHLDNPGRNDFEQGSRDHFKIFFKQSDIVNMGLFWWPGFSLSQSWCVNWILLLNSDTEACFEGIFEKWILHYRDPPTYATRFHRLRYADCVRPGPSNADRRTYLRYDDIVRNSGGTVDDKHDDDD	191				flat	NA	NA								BWM			SS			4.18848		1	48	32	191	8.37696	16.7539	25.1309		0.0221		-23.476		26.6446	29.2533	5.52198	70.985	27.0376	84.4412
15322	15343	WBGene00007750	syg-2			C26G2.1	Q9U3P2, A0A131MDF3, A0A131MB76, A0A131MBZ2, A0A131MBR9, A0A131MBS5, A0A131MCN5	Q9U3P2	MLSQAILLWLFGSIHISSQFFLESPSNLSTIAGESITFRCSAEKSPEPIVYSQWKSNTGSLLGYHQEGILPGHQGRFSYIKQNAEELHLKITHVNLDDDGEYECQMLHPEEGPIRAKSFLNIIVPPQLVYFSNYQPNSIIAVKENTPLNITCVVPNVKPEPEVLWYMDGKVMSRDVKQASTPHLNKTFTVYTSLVVQSDRNDHGKVITCEAFQKETDIRITTNTTLDVLFPPSDPTVEILRNPSALRSGDNVTIACSVTGGNPPPDVFWYHENKRLQSHSTLDTRSKEIKNIYSFIASQNDNMAEYECRANNSRTGNPKRKAMKLEVNYPPASVELFGESNIRYGSSANIQCKSLPSNPASQITWIINGRSVPTPTQREFVVENGIVSSSNVSVHSNEL…	1217				flat	NA	NA								BWM			SS			3.73984		0	118	0	1217	9.69597	0	9.69597		0.5158		13.272		23.9892	88.0472	61.9234	12.6775	3.55687	2.96242
2013	2079	WBGene00007764	C27B7.7			C27B7.7	Q18245	Q18245	MISLSLVLLLLFGVRCFDSAGQINDDSPLFISTSIDNSMNLKILVEKKPYFTGSVTGYKLYYTNDSSQTNEEYEKWMHQEALSNQNSYNFVIDANKHEIVSGDVYRVRATVFFNNVESVPTGVISINTRQSIPKAPLIVNTKILYNSSVLISFVPADDVNAIENYTLMYKQMEAEEWKSLNFKSDFDGKVLLDGLIPNHTYEIKIFVTGGIVQGTPSNLATFTTNSTALALVKTEPDEEYTADPQTNEPLSITCTVKSVSKASVLWKVNGIKVSVDSSFYTVVTSVHEDFIESTIRAKSRTRSAKFTCLATNDAGDSSKEVNVIIKGPGSPPSEITLVAEKRGYTISWKPPSHPNGKITKYVVYHTLNREDPLSDWRKIDLDGSEKMVRIIMDTEESFY…	1456				flat	NA	NA								BWM			SS			1.51099		0	10	0	1456	0.686813	0	0.686813		0.1738		-12.151		5.95922	82.6455	65.9961	1.49349	0.960452	2.15181
2279	2345	WBGene00007919	C34C6.7			C34C6.7	B7WN89, B7WN88	B7WN88	MICWLNLSIFYFVFSLYQCHQEELSQNIEVTASDSAAEHEVFEGISSNIAGKGEKLEEEIDNIGIVMQPEPRVVHEASEVSDNIELNIKDDLNLKSRLDNFTRAKFRQSTTVTPNIVAVEPSIEGVEDDLDHDEQGEPEDSEIRNRNEHHFAELGGKMKERRDHVDDPDIQEPLNKPISAIPEETSNSATIQYERSSSGTQNPQTSLNIPTAQNVPKLKQLKNQEILKDHFISEVSDVSNVADVSAPIVISQVPEILNGEPAGVPANFEEEDKERVEEEEDRISWDLIHFLLLLSPYEEGEVTWWTIVLEAVKCSLRSCHNSSSHWHDRSVYLPRITRHRRQDSDYLPGALSPTTPKPCLCNNLETYFEKLYESVGKKKKEKKISNSTTKFV	392				flat	NA	NA								BWM			SS			8.92857		1	250	214	326	11.0429	65.6442	76.6871		0.0428		-13.031		57.2709	58.2486	65.5736	36.2024	24.8489	52.1322
16857	16868	WBGene00008040	ttr-5			C40H1.5	Q03575	Q03575	MKLIILLCLVASSYALIGNTQSAGVRGKLICNGKPAVGVLVKLYDDDRGIDADDLMASGKTNGNGDFEISGHEDEVTPIDPKLNIYHDCNDGIKPCQRKFTIKIPDSYINKGKTVRNIYDAGVIQLAGSFPGEGRDCLH	139				flat	NA	NA								BWM			SS			0		0	21	0	139	15.1079	0	15.1079		0.0113		-23.357		39.1796	30.5036	16.0919	61.3854	51.0366	74.4338
4182	4244	WBGene00008392	D1086.5			D1086.5	O17728	O17728	MLIQNIFLLLFPISTVFSSNGVNYFKSECSFFPGRSNIKYCRLFEGAKYYWRHNSIAWNPEQTKNMSLVELRKHCDDYFVCMENTGCYMDFVNYQELDKCIDDVFHLGPMYYCEKTLKEVIEKTPDQVSECVKDYLKNKNPDKVDCVSIQTKSKCFLEDVGKHCGSDFLSLYKQHINIRLYNRACDGRLRYKDRVRGDDNSMQRGIITKEDVERDFGSNSTQISA	225				flat	NA	NA								BWM			SS			0		0	43	0	225	19.1111	0	19.1111		0.0115		-20.431		39.3761	36.6863	20.6436	62.5522	41.8718	72.6971
4185	4247	WBGene00008395	D1086.8			D1086.8	Q7YX57, E1B6V3	Q7YX57	MLRVLTLILFLVSLSYGFLEEAEGVDPGNRVCDPDEERAAQSCKNGVTVLSATFESIQGQHESFTASDHIGINQNCKTSLTCLKTNVGCSNISQNDVDTLTKKCDYMLYLTGGFYACSQKLKNRKDNSLCVENFFDNAEVSKDTQCTNWSDNRACLKWTIRDACGRSYWKQYKPYWHLKHSLMGC	185				flat	NA	NA								BWM			SS			0		0	26	0	185	14.0541	0	14.0541		0.0228		-17.477		44.7875	40.1646	27.2144	70.985	82.6333	76.8558
5142	5204	WBGene00008603	F09B9.4			F09B9.4	G5EE90	G5EE90	MNFKLLLVLFLATSLLVSMSDAGKDRRKKQKQKERQEDDDNNDEPAGGSEMGESGKAKDEKERTSVLEKQAGKKGDDESSSSEEDKEDEDEKKDNSTVIIRVKRHTMLFSSEESKEEENEIIKAEKELDEEKVDQFRQSRVLRFTRSADEARVLPTDAAKFKRDTITQTLKSKELNDGVQLPLDKKPTATASTN	194				flat	NA	NA								BWM			SS			36.0825		2	186	186	194	0	95.8763	95.8763		0.7421		-30.939		75.3378	65.3844	63.7436	54.1341	72.2771	86.4603
8270	8331	WBGene00008706	gba-3			F11E6.1	G5ECR8	G5ECR8	MSRWKVVILCLLSFMFEIGHASFQCNPKTYDGAFLNIVCVCNATFCDEIEPIGEIAEGKAIVYRSSLDGDRLKRMSMKMKEKLRKNESVNVTITIDASERFQNIFGFGGAFTDSAGDQFVSLSETLQNYIVDSYFGKNGLEYNIGRVPIASCDFSTHEYSYDDVHDDFELKHFALPDEDLKLKIPFIKKAIEKTEGNIQLFASPWSAPGWMKVTGRMRGGGAMRNDKRVYQAYADYFFKFFEAYSSHAITFWGLTIQNEPSTGADMAWRWQTMNYTAETMRDFLKKYLGPKLKENKLTETLKVMVLDDGRGLLPGWADTIFNDPEATKYADGVAVHWYGNLYSPAVLLDITQRHHPTKFIFGTEACAGYFGHHGPIMGDWFRAESYADDIITDLNHHVT…	522				flat	NA	NA								BWM			SS			2.29885		0	17	0	522	3.2567	0	3.2567		0.0695		-14.445		12.2525	25.6988	2.06583	32.3753	31.1054	30.8622
5372	5434	WBGene00008770	F13G3.12			F13G3.12	Q7YX39	Q7YX39	MFIIFFNLILITCAIAKPFEQHLLQDRTFVEIEAVHLVDTPLGVQIVHAVVPLSAIGLDNALESESVWYIPEQQEFPKLGYLTSHGWFFLHEQHFKRIKKRAFSKKAPKNAQLDVTSLVRLVPSSFDNVQFIKKGPMGAYIYSDGGSQKSSQFEAIPSMSTRTTDTQVVKTGNLAAYIYTEVPESQAFVSGSESLYWLVPAIPSQSKNSRSYTTRLHDSSLLLYHGMPRLIKLKT	235				flat	NA	NA								BWM			SS			0		0	9	0	235	3.82979	0	3.82979		0.0135		-13.283		35.9862	39.0248	19.7494	46.2073	54.7015	57.5903
5621	5683	WBGene00008953	F19C6.4			F19C6.4	G5EC50, G5EC20	G5EC50	MKFGFIFIIVLTTVSQSFHKSIDISKSPCNDFYDYVCAKDTRSISNLTFTKMNQELEILKPNVTIENNGTFIALDKIVKLTRVMKWCTEIEVLFTGVFTVDYFGDLHSENKMIHSERYTAVVSRLKEINTTMANIFYNALHANTEILQQMEIPISSKNKFLHHLFNTLKTNAINELETTTISEAAKKSMKKGIEMSKVYFAFYDFNNITVYKEAKLVYETEYYRLKKWLSPKDLTNPIAEKILRLGAIDASMTLFAKTISEYDIRFLFQAIVANPANDGFQYLNNNHITVITRNDLNQPEKAIADTIFVTTHEIMHRVYPYGNFLMNSNVTTAALQCARREVQMLGDTDAVKPISGWFNKDVAHEDVVNIMAMRMIMKMATIKSTNEKQLKEALETIVG…	495				flat	NA	NA								BWM			SS			0		0	19	0	464	4.09483	0	4.09483		0.0143		-9.471		6.47998	25.6988	4.51486	8.46229	11.0857	18.6785
5769	5830	WBGene00009058	F22E12.1			F22E12.1	G5ED57	G5ED57	MLTVLILLFGCTAVNSQQLLSNPKCNHWPDRGTCELDFHVKWYYDRYDHRCRRFFYGGCEGNENRFDSLEECSSQCHYQVPTNRDRCFQPHDPGNCYADIERWFFDENKKQCVCSWWSGCGGNSNIYYSYNHCMLICGEYAEHGPGIDEKYWGRQMNRSMSAESLHVFNNPTESFHQYSEEPYPVQVPLENSYYDSHPRRYGNSDNWDNKLMTINISHRDDGPSYFHAAPAVTVPMFSRAAQSFKTQADGLTIHRYDSEPRPMQVLDQDVNWQIQEQASAQQNGFMKRRFKMQKKKLPPRMIHLGTRPASQSNSYRIQLDSEINEHNRPVTYQVVREQDAHVQQHNQISQSLQNEAEETQRRIQDTMRRNYFEQARYQRPPVQMPPPPPPPQQNSPSVN…	763				flat	NA	NA								BWM			SS			18.0865		3	599	542	763	7.47051	71.0354	78.5059		0.9332		6.496		86.2491	92.7978	67.9686	90.2972	9.74699	65.9175
3492	3554	WBGene00009291	clec-264			F31D4.4	O45419	O45419	MRFLLFFQFILQLTHSKTPCAPSWLHIAHLDSCFLSAPQPAEFSEALEYCTQSNASLVIINSEEEASIVREFFARENPSFFNWIGMRWNARAADFQWIDGKSKNYTYFLPDEPGVSGECIAWVLDDNLDGWQAISCYYSQFFMCQRPAEGIITTWHRDEEGTIVSPNWPNSYENLEYDTHIIKSEPGTRILMYFEEVDTEHNCDIITVTDDYGISGRTLFRLSGSHRNHSVISNRNHVMINFKSDEDNIGKGFVMRYKILRPLPVKVFSSNSFGTVTSNNYPNSPDSFLIQYYLIQCPIAHHVALKLKAMQLDKSDRVKIFNGNDETAGKLKIFRQFSPSSVDLIKTTQNSMFISYDTGEQFNASNHWAFEYNCIPDGNLGDEIII	386				flat	NA	NA								BWM			SS			2.84974		0	14	0	386	3.62694	0	3.62694		0.0279		-11.619		30.8696	36.6863	11.0391	46.2073	22.7684	57.5903
6531	6592	WBGene00009578	F40F8.5			F40F8.5	H2L299, H2L2A3, H2L2A1, H2L296, H2L2A4, H2L2A2, H2L2A5, H2L2A6, H2L298, H2L2A0	H2L2A2	MIVRISLLASLLVISTIAFECSPDTILRMATNKREKQLERECHEQKTSQAVCETKEELEKSWKDFQKVSNEYKEAVTACRKYVEEKSRPKRTVLDGDMGEPTEDQEDTNDHARRRRHHNHEGHHGNDMKHRENMDRKKHGTHVDHHGRVRRNGDHDPNDPNVDHTGHNHRVKRSIDDDPSDTTIDHTRHNHRRKRNQDDDPTDTTIDHTGHNHRRRRSDDHDPNDPNVDHTGHNHRRKRNHDDDPSDTTIDHTGHNHRRRRSDDHDPNDPNVDHIGHNHHRRKRNHDDDPSDTTIDHTGHNHRRRRSEDHDPNDPNVDHTGHNHRRRRDQDDDPSDTTIDHTGHNHRRRRSDDHDPNDPNVDHTGHNHKRRHVIASRSRRTVCSTAGHDQLSAMSSKFT…	448				flat	NA	NA								BWM			SS			27.2321		1	351	325	382	6.80628	85.0785	91.8848		0.8711		-15.667		91.5181	92.4908	75.576	98.7521	22.1125	99.3662
6654	6715	WBGene00009645	F42G10.1			F42G10.1	Q09393	Q09393	MKLYFLPSIALWAVFGNGDQDLSSEHPIPCNNFYEYICHKNITRVPSRLRDVRAMEVSDDIDQYQEYVFHASNKQRLWQSVNPDIVSKWLVQFNTYWKGVNWNEHQKKHESFLNLDAHEKYKNLENSFEGYDFQILTKFYKSLKLSVEYLTELKIPISTRNHFYHGLFDEIRDIHILNIRTMSKFSEDRKNELIENVRNLKIIFPYLEYNDVKVWRDAKTAYEKEYYRLKIMIYEPNLSPIIVDKIIRVAAVNPAMEIFEKYITSFTSRFVFQHITAAASGLSFNYQNEIHISVFTMFNPIADPKSVYDQFLYVLCHELQHVHYNVDPPVFDEATWASEKQCVVDRIDHFAAAYKTNRANWTGAPFSYEDSANVAGLRLMLLYVAQKTSDSQEIRDTVE…	587				flat	NA	NA			1.71832	1.24466	0.000139134	0.0186263		BWM			SS			6.81431		1	90	65	587	4.25894	11.0733	15.3322		0.0336		-16.92		12.1371	62.8224	1.84721	17.0818	13.9204	17.2562
9709	9768	WBGene00010648	K08C7.6			K08C7.6	G5EBP0	G5EBP0	MIILTFLLFCATVVAENSIHIQYFRRPEEYGIFKVIIDGSRQWESYIYMNRSANLREEEIYKLVKPFFEQDPSTRRYESSSITRHLGKQFEYILNRYTIDEIAFENLCSQMKPKFSSIILSTTQTPKKIKWVVEHPSAPFTIPTGFTKNMGRDEYQIEIGGKAKLDDDNFDFEALQNTQKLIIKQPTEFKNGVNGKRLLKFFAPELYMEGTNEIDSDSLKEFGKEWLEGDRIVRNWEIHLYDEKQSENLYFEKNGTTLQLTIENGRFTASTYKTPEGLIYTFTSL	285				flat	NA	NA			1.20666	1.32354	0.00128261	0.00165251		BWM			SS			0		0	5	0	285	1.75439	0	1.75439		0.0091		-23.692		24.338	18.3837	9.85753	35.3918	34.8219	62.7733
10513	10571	WBGene00010872	M05B5.4			M05B5.4	Q21515	Q21515	MRDILVSLCIFLVLIGKSDTKWFGKFGRSQAKGLPVILVPGDGGSQLESNLTGKPSVVHYVCSKQTADYFDLWLNLQLFTPLVIDCWADNMQLVFNTTTGLSENMPGVDIRVAGFGATESVEWLDKSKASQGRYFFDIVDSMVSWGYRRGKNVIGAPFDWRKSPNELNDYLIQLKSLIETTYRWNDNQKIVLVGHSMGNPLSLYFLNNYVDQAWKDKYISSFVSLAAPWAGSMQIVRLFASGYNMNYYRVILPPSSLRAMQRSFSSSAFLFPSPVAWKPHEILATTADKNYTVGNIKEFFQDINYMVGWEQYKQAARLNGNLSSPGVPVHCIYGTGVPTPEKFSWAPGYFPDYPPTEFMGDGDGTVNKKSATVCTNWIGNNNGYKVTVHEVFQADHMAI…	417				flat	NA	NA								BWM			SS			2.8777		0	30	0	417	7.19424	0	7.19424		0.5018		-10.064		31.044	39.0248	13.0115	62.5522	35.7775	38.2633
15575	15595	WBGene00011498	T05G5.1			T05G5.1	P34554, G1K0V7	P34554	MHSRILLLLLMFAFNVGLINCGQSLVSPQSNCKIRCENGGMCVFDLERPDFHSCICLLGVYTGDRCQIRIAPEDIETTATSDETSHPMNIQHQQSQADIDDARRRDDERKREYERQVAERTRKEKEDRERASDEERRRQQHEQYWKEETARREQQRAEAERRIQEQRVRDDERRRQHEAERSQIEERRREEESRRLAAQRETDEARVRDEERRRQETEKEVEKELNDKRTQSMNEQFEYEGGDEEYPQVAEKEDEYDEGYETDNTEDVTITTTKTTKLMKPMVEESKGVDGDDGSDMIMEKDEMEDDKEPIRKEDEKLIDSIKHVFNKAVDETVKEHPIEEDEYWDETSKKTDEDSWTAENEGTKKTEEADEYGMEEGTEGWMMVKKENENAAVGTTVS…	411				flat	NA	NA								BWM			SS			17.3184		1	356	339	411	4.13625	82.4818	86.618		0.0237		-25.772		37.3053	69.2213	65.5736	15.0454	19.0346	37.6738
15619	15639	WBGene00011540	T06E6.10			T06E6.10	O45764	O45764	MILLILLSSLIMGASTGKTGITCANVRCGSPGGCGMVASCPDCEPGPECLEKNDCNTKSCAPTEECVLVQVTCIMAPCYPIAECRPKKTQIRKRRQVGTSCKDVRCDTPAGCAMVRPSGCMDSPTMTGCELKPTCIHVNACTTTKCSPGKKCALHTVQCFTTPCDPVAKCETPLNFLSEPFNPGCGPNEHFVGCKNICSDTKCNEKRKMCPAVCTFPGCVCLNGFFRDKHDKCVTQEECDEQKRKSIKS	249				flat	NA	NA								BWM			SS			4.01606		0	52	0	249	20.8835	0	20.8835		0.7174		-30.203		74.93	17.6247	59.1575	80.7738	41.8718	89.4989
15798	15818	WBGene00011692	T10G3.1			T10G3.1	P92018	P92018	MNYYLFSLCLILLCSIVKTSPVGHDGTEDDNLESRRSEDVTTTHPTFTVQRLDAPIERIEIRLIDDNTTHSAPEVTVSPVREVERVKAENDGNQELVSTEQTAELVHEPDQHPSPAPTEPLTANDDMYKKVEYVVQPTSNELTPTTDRSSEPIVVGEDPSYYSTTPSDQQASAEAKAWISVSTTVPKFEGDIDEDDLPPPPATEDTENEEPEEECLANKEKLSDEVIEKLQAETTMYYRLVRQRNEQQKEYCGGGEARDTSSDMFRRCSNWRAEKLVYYYKLMRKTYCQVDNWPNSPKIKKTYGEYLNLFGTFYAFQK	318				flat	NA	NA								BWM			SS			9.74843		1	214	214	318	0	67.2956	67.2956		0.0481		-19.466		50.0909	66.4456	49.9312	49.4154	27.0376	70.0639
10340	10398	WBGene00011726	lpr-2			T12A7.5	G5EEB8	G5EEB8	MSFFTHFFSLIILIIVSIEFVSPFCYPKIPLLDLQPTQYNGSWFVIARKPSASRYFLPKNINSSMISLILQKDNKTLSFAEYHTVDQKCHSLKGSMTQHKGGYMMEVNQTVGSNYVEKIFFRSIYHGYSGEQNEEMNMVLYGCLDGNDNGGCKIGDELVLIMSNSRHPQTLQLYKSAQVIEDEACIDILHFTALDTYTECGDEMVDEDQKLRHAKIDEDNEFVDVECRVENIRPANNNISLFFKEPRVLTVVAYIDASLSGEQIAHISCRYNTETTAECEWIRQDTCFKTNLTQTLGSNQIQISSSILKVNGSTVPIDWSGFVLWENGDEYISMHCGLVDDDGGCDSVRVYVWSDEDHMDQPTINEIYRELQKVCVDPTDLIFLNTFHECIIPSPTPNL…	1076				flat	NA	NA								BWM			SS			2.23048		0	6	0	1076	0.557621	0	0.557621		0.1338		-8.849		6.52911	11.1078	53.0386	13.9278	2.76099	8.98059
15848	15868	WBGene00011736	T12D8.9			T12D8.9	G5EFT0, G5EBU8	G5EFT0	MPTYYYPIFILLLFLSTSWAGPTVLITGPSWNNLAKFNVLLDFVPEDVVENNSFFNSNIVIFNEAYQDSMLSNSKVYEIDSVSLKNNVSTVVFVSDSAKEHDENLKAILRTERSLFVVEFGRNNQKPWQELADCWATSEIASTTQNKVYFCNKKSQEIPFEISTELILIQKPVVPKITSFFYASATKHRVDRKKVEEELEDEIQDIVEESMRTVERRKKHDNDDDDDDEDGNEFDNRHDPKRDHRLHCKYRKSCYESGKRGLIEPFDISFDHIFHFWRAPATQQHHLPITEDADQDGVPDSEDDDVTLADRKFVCKYRTSCYKDHNIPLSDKLQERERSFMSAKLQVPQGKKRTLKDIAKKAVSGVKEREEEAKARPVPKSLIVEKKLQEIENQLQKKL…	1181				flat	NA	NA								BWM			SS			22.0999		1	1033	1027	1181	0.508044	86.9602	87.4682		0.6143		-19.261		87.2881	95.5908	94.1341	2.24515	1.83984	58.2756
16054	16073	WBGene00011880	T21B6.3			T21B6.3	Q22631	Q22631	MQATVGLFALAVLFCLADAGRISVSRGKNVTKIDDLCARMHNNTALEGSSPLLMMQATAYECQKKCVDIFPECSAVVYYYLHNETKKHFCYLFSDNSVQDKIDLVEQKPENKKDIVRMLELVVDCHQFDAHPPLEEDGLASSTDKVDRKKRQQGDEAVEGVGDWTDWSHCSSNGHEVRSQACEYGRKIQRRGCPARSAPQRVPAPPAQQYAPRAPEYPSAQQQQQQREQQQREQQHREHQARLQQHQQQQQQQQQQQQQRPPQPQPQPQPQPPQRPPQQPQSFSGTHELHLQRQREQQQQQQQQQQQQQQRQQNPQQQPQQTTQFGQSQIQLQSGPVPPQQHPQQQQPQQQPELERSPLDQHAQLYQQRMSQYRENFNQRHPARPKADPCPGGFCAPVP…	821				flat	NA	NA			2.29882	1.45226	0.00321793	0.0191299		BWM			SS			19.3666		1	253	238	821	1.82704	28.989	30.8161		0.9938		44.564		97.2685	91.6949	93.8295	96.6937	95.9789	97.9121
17401	17409	WBGene00012225	W03G11.3			W03G11.3	P49713	P49713	MIFLIFSILFLHLANCDYTPDWESLDNRPLPSWYDDSKFGIFCHWGLYSVPAFRSEWMWWYWKGTQPDKDVVNFVDKNYKPGTTYADFAKDFTAEYFNANQFAETVKTSGARYFVFTSKHHEGFTMWPSRTSWNWNSMDIGPKRDIVGELRDAFKKTDVHFGLYFSQFEWFHPMFLDDGKFNTTFYPEQVSYPQMIDIVTKYNPEVVWSDGEWDKSDDYWKAKEFLAWLYNSSPVKDQVVVNDRWGTGTMGKHGGFMTYSDHYDPGKLLEKKWENCMTLDKHSWGNRRDMKASEVNTAYEIIEQLARTIACNGNLLLNVGPNMHGQIPAIFEDRLEEIGRFVNITSEAIFGTRPWIHQNDTSASNVWYTSKYSSGKKPLKNLYQNVYNFQLEEHTIVYA…	482				flat	NA	NA								BWM			SS			2.07469		0	26	0	482	5.39419	0	5.39419		0.0899		-17.693		18.3591	57.3888	4.73594	40.6141	22.7684	61.3142
16821	16832	WBGene00012382	ttr-16			Y5F2A.1	P55955	P55955	MRSLVVCLLLAACALECTARLQNVTVKGVAVCNKKRLANVEVQLYEKDTLDPDDLLDTKKTDAEGEFSVYGEEDETHAIAPYLLITHSCNPSKPNCVRIGRYLVPEDKIGGTYDMTYVTLDIKVHGEKEKCQ	132				flat	NA	NA								BWM			SS			21.2121		0	21	0	132	15.9091	0	15.9091		0.0035		-33.289		45.5097	36.6863	19.7494	67.1408	62.5817	79.0862
18072	18079	WBGene00012544	Y37D8A.2			Y37D8A.2	Q9XWV2	Q9XWV2	MNWIFIFLAAAVAIGCEARQERTYTVCQKPEGDLHYFKEGRKTDEELCAKRLATAYFHDEVNQTGWAFLEVDVISPKIPHYLQGYAAGFAEGRATRHLIDLHIINTVNGYCDGAKHFCDELGEFMVDNLKWMEQEIRENPEDEYWQQVNLTVNQLFGLIHGYENQLGAEIDFKQIAVHPIFMIQIAGDLEDLAMKFKKPENPKKVFSGPGHCSALVKLLPKNEDILFSHVTWSSYGTMLRINKKYSFKTGDPGQIYSFSSYPASITSTDDFVLTSAKLAILETTIGNYNEKSLDLITPNTVLTWIRAEIAHRTASSGLQWAEAFGRHNSGTYNNEWVVVDYKQFHRGKEVQPETGIIHVVEQMPGHIVHSDKTAHLFRETYWPGYNQPYYKQIIRFSDT…	571				flat	NA	NA								BWM			SS			0		0	23	0	571	4.02802	0	4.02802		0.0161		-14.458		14.6672	66.9786	6.33751	16.6175	13.5274	41.098
12046	12090	WBGene00012857	pbo-5			Y44A6E.1	G5ECT0	G5ECT0	MTRLSILQHLLTFLILSKINATSTTESYFDSSEEAPNVLLNHLNNESEGEELTQINDTQPAFVPGSSKRLTEYLLSRHNLNAPPDGLLYVEYELELVHILGIDELKQTMTVLIYVDEHWVDPSLTWDPALFGGITKTWIPLDKIWVPDIIVFNMLAHEDLLSAVRAPARIHYNGTIVASHPAVHTVSCEINIRHFPLDDQRCAIEIASWAYGQEKIRLHAHTDHSLEHYKRNEEWHLLNLNVSEEKYEHEGVEVSEVKFEISLKRRPLFYMVTLTFPSYIMCAISVVGLFARFSTTGEREERFTLGVTAILTMAVLSLVVSEKVPHSSTHVPLLVAYFLFNMVIVSIAAMTTGIVMKVHRLGRYGDEPSDFWMRCFLLKPVFRTSNRRKYRMNPEEPTQ…	504				flat	NA	NA								BWM			SS			2.1611		0	15	0	504	2.97619	0	2.97619		0.0033		-20.734		7.30287	7.04741	11.0391	22.1518	11.3707	24.2741
16830	16841	WBGene00013077	ttr-24			Y51A2D.9	Q9XXR4, H2KMI9	Q9XXR4	MFKEILLISTVFLLTDALGGIVGSKQTVTVVGKLVCNGAPARDVRVKLFEDGTIYDTKMDSVKTIADGTFKVSGSQNKIRKIDPKINIYHKCNYSGLCPKKVTIHVPKNAVGKGSKEAQLFDIGTLNLANRYPGEGTDCIH	141				flat	NA	NA								BWM			SS			0		0	26	0	141	18.4397	0	18.4397		0.0045		-24.019		36.5831	17.6247	9.35888	52.9452	46.2786	62.7733
16831	16842	WBGene00013078	ttr-25			Y51A2D.10	F3Y5P3, Q9XXQ6	Q9XXQ6	MLKLCLLFLATLAVAHGLGGIVGRKQTVTVVGKLTCNGQAVKDVKIKLYEDGTVYDTKMDVTNTLADGTFKVVGGQNKIRKIDPKINIYHRCNHVGLCPKRVTIHVPKNAVGKGSKEAQLFDIGVLNLANKYPGEGTDCIH	141				flat	NA	NA								BWM			SS			9.92908		0	28	0	141	19.8582	0	19.8582		0.0043		-25.45		39.1796	15.0454	8.91427	56.5291	55.9445	69.2459
18693	18700	WBGene00013081	Y51A2D.14			Y51A2D.14	Q9XXR2	Q9XXR2	MFKYVLLVIFLIALIEMASADFSCYFSDSICKSITCRNCKVATCITGDCVCTLC	54				flat	NA	NA								BWM			SS			0		0	7	0	54	12.963	0	12.963		0.008				31.604	11.8251	6.33751	68.3911	59.7028	76.0771
18821	18828	WBGene00013181	Y53H1B.2			Y53H1B.2	G5EDV7	G5EDV7	MRSALWLFPVFYLAQGYVFDCLDDCECDTVDEVIHCHNGDRTKLKLPASSRLRGFPVIGLTYNKIERLPDEETLLAKFPDLKIIDVERNPDFDCTTVNDYEHIKIVSDCFKNITEISKVPKLFRPTRECDVACQASKHYAKLHEYVLSLWEILKDKYENFDLDTTLRDIQDFFTLVVKKINNVGQDINNRLESAKTARNHPKQVTPMPDLTEVQIQGEETDV	222				flat	NA	NA								BWM			SS			0		0	31	0	222	13.964	0	13.964		0.0101		-25.4		24.8023	34.2913	20.6436	42.3409	29.3712	69.2459
937	1004	WBGene00013275	btb-14			Y57A10B.3	Q9XWH8	Q9XWH8	MSAMRRCTCFIICLLTSYTYGTTELVEYTRGDIEFDSSNGEKIIDISTTKGIRCEWKVSSDYYTACFKWKFIWDQVDKYEVAGFSGQITVNYTTDSEGQKTRTVKVNLTDPGGEIWYNVSRSRYLSTYYASYNYTLEPQKRHMEAMELDKYFAPVDDRDAVLIVEGKKLHVSSCFLSFHSTYFHDLFEYDNSTSLLNIEIPVEGVSYEDLGLLLSVVHSTATFPNDGNSKKLLELASQFQTPYVLGLVENHLLTNTFAWNETLMLLADKYGLMRLLGKSIRRIDSIEKARQLKDSVFLELSDSAKVKVAYHMIQLL	316				flat	NA	NA								BWM			SS			0		0	8	0	316	2.53165	0	2.53165		0.0222		-15.205		18.8848	24.4461	13.0115	46.2073	31.9725	46.674
10351	10409	WBGene00013542	lron-12			Y75B8A.5	Q9XW74	Q9XW74	MILLLGTTYVQKFNIFIWKLLILFHFLKYSNALRDTCPMGCQCDEDKQQVTCEGQQVVTLPDRLPSGYESLVIRNSSVRTIEKNSFRKMEKLMQIEFENNPNLGTIEKLAFKGLKKIRLIKFTTCPGLTELQKNAFSGIQNQMGLKIIFEKTPIHRIDGHTFRNAQNIRELTISGEELALSRHCFANINQLDFLTVSGVVLIEPEIFTNSTRFHVVHFKNSQFDIPPSTFSTLSHTSHLLIEHSKVPSIAPDAFSGLTTIQVIELHACQLGTISARAFANVENLGELKILRNTIGDLDTSESIMSRALKTRIEENTLECSCGMKWMTSVEEMSDINFCSTTASFRSIRSFIKAKCLNPSQEISRKTNHLPSISSFSSSSIVNFYFLSLVWYFSVRFFVF…	401				flat	NA	NA			1.41623	1.45157	0.0251661	0.0068988		BWM			SS			6.73317		0	28	0	401	6.98254	0	6.98254		0.0086		-20.522		20.5429	15.0454	16.9934	33.9008	14.3577	46.674
19708	19715	WBGene00013884	ZC412.3			ZC412.3	Q23307, A0A1C3NSL5	Q23307	MRTLVLLSSVAILSTLAVKCKYDGKDLENNEVITVQNAFRIKCLTEDNGSWKTEIIGCVTPDGTEINAGEKKEVGDKVHECVKSESGQVSLKESKGRTAACPGGQKHGEQWQEKSFKFRCGDGGVVKFEACVGQDGSVIPAGETGKIGGFDVKCEQHANGTITMQAANDPKSYDCTAKDGSSKKNGEEYVEGNFVRKCGDYGQGKIIGCHAENVGNTIGINQNVTSGDIVYSCTKDGSNYSFKTYSLKAN	250				flat	NA	NA								BWM			SS			0		0	9	0	250	3.6	0	3.6		0.6415		-16.355		63.4709	41.2479	35.7013	60.1793	54.7015	47.8482
1100	1167	WBGene00015393	C03G6.5			C03G6.5	O01454	O01454	MIGFLKFALIGTVLLGVANGASVATASAKGSNCTVQDGYAALMCLVRLSDFAEKVDNLDMNDKTKLKEFKRSCDSLHSCYSNLNCTTKSDDEKDKYVESIKQYCDAVVYVSDGFSKCSDKLNEKKSKCFDDWDPIPNKIHLEEDEAKIEKIKNEACKTYFGKDDCMKKEITETCGKEEWDSFRKQFVNLSGGLVSKCDFSRFE	203				flat	NA	NA								BWM			SS			0		0	31	0	203	15.2709	0	15.2709		0.007		-26.999		35.242	35.5072	39.1722	36.2024	64.0334	65.1363
1207	1274	WBGene00015472	C05D9.3			C05D9.3	Q9GYK2	Q9GYK2	MKSRIFFITLLTIVAAQESADQLCSSFDAQQSCGQCIKAHAECAWCIDPHSSLTNRCQLKSKFTNETCTPHLVYSPQTAQVKIQQNLPLETKQHDGKTIVRQQPQAVSVRLMPSHSATVSFKYLHQTDPSRRSTEPETMEIQTSDVKDTPLQLKFFIVCDGELKETKSCRVQNNQIVEFKIEVLVNSCSSTGDITLSVGILRQRTIAGLYVTTICGCECEKHPEINSRLCHQNGHLVCGQCVCDQSRGGDKCECPLASHGVSKASELEDKCRFNSSSPVCSASGKCKCGQCQCNKPTVTGKFCQCDNDSCPLAVNGKVCSGNGVCDCGVCKCEMGWERDDCSCSTASNNCVDNGTPAPEEKDKPESVPEEPEATEKPDDMPSDSDLEKELDESSSAKEE…	423				flat	NA	NA			1.32179	1.54042	0.00599341	0.000120858		BWM			SS			11.1111		1	97	72	423	5.91017	17.0213	22.9314		0.8498		-11.72		80.8008	66.9786	80.5232	64.758	45.1904	46.674
1411	1478	WBGene00015633	C09D4.2			C09D4.2	O01734	O01734	MHLFLSVFLLLILPLISTSAVENNQNIVDFSVKDFNKNINSIDILNKKWDIVSKYVKFNGNSSKLNGRLRLSEKIDKIIFKLGDDGANQNEIIVSLGNRNTTHMTVHTDSYKMKVSTSKQVVRKELSLRTGSSNENGCACVHGNCACCLEISVPEFRHSVCVNATYNPVSIGLDLSIGVDGHYFSEEISLRNPPPVCFSLPIPGAEHIAGVCVAFTKLDLDKKEKILSGCMDFEVELIHLRVLTFKLGCFRMPI	254				flat	NA	NA								BWM			SS			5.90551		0	23	0	254	9.05512	0	9.05512		0.0148		-18.432		52.1469	17.6247	46.0599	68.3911	46.2786	53.4463
2375	2441	WBGene00016474	C36C5.5			C36C5.5	O16405	O16405	MKLVLLLVTIGILSLDLVQGVKVNLVPLGNMVNCTLSVEFHSIGCIMRLGEFFDDLDKLELDDKAEVVKFSKSCETIPTCFETPQCTPKGIAPEEKKEMVKKIKNYCSGVSYIANDFEECRDKLAENKCYKDWDPFQRKFNLEKDEKKKEQMREDSCKNYFGEDNCMKTVVTETCGESDWAKLRDHFVGIGNNILSECGFSKTD	204				flat	NA	NA								BWM			SS			6.86275		0	21	0	204	10.2941	0	10.2941		0.0105		-40.571		33.2474	15.0454	24.4436	43.2302	46.2786	79.0862
2685	2751	WBGene00016751	C48E7.6			C48E7.6	Q8IG72	Q8IG72	MAFLALISLITSPLTFDLQINGPSVNPAPIILSTPSKNLSLSFHNGHIYADSIPVSAISENETTSFSLKCISHISLHFQSPHANSLVYSPTLCSAPNIGLTINETALKGCMFDITQSSSILTQRICGIDSKNAAKNPEKGPIYVAEPVELNEGGSMPLQWKNVYFMPSSQDVNFSHTDIFFTIVESAKHGEVRIDDVVTSSFTYAQLLARRVIYKHDGTETREDRLSFQIEFAVKHKQLIPAESKTYSLRIKINGVNDPPELVKRSKDEKLLIASRGSRVITNEILILTDADDRPEKVRVQVVESSGVHIEVHGQKVNEFSHKQLIEELVSLVDEGTELGSGRIRLIARDREARSGVVILETQSTKVDVKLVHNTGLKLLHHSSALLTNKNLSFDASIQ…	1996				flat	NA	NA								BWM			SS			4.50902		1	131	106	1996	1.25251	5.31062	6.56313		0.2765		-8.331		7.10391	86.4947	88.8873	1.99951	0.397937	1.15451
2775	2841	WBGene00016838	C50F2.4			C50F2.4	P91177	P91177	MRLDCSSFIFSLFSVILVVVADENDVQVKPALSQCKRVNPCGATISTYPLLEPDAEEASGFGSGAVPVYDEILTHEIYDLNATPEMHNFTLCSCPDDGVCDFESDSNMVKVDYHVTLRFCNLETISSTCKRYDVNLRVIGAAQPSGDSVQEVSNAMMFCNCQNGFSRQHVEVWSGQDISLNYKCL	185				flat	NA	NA								BWM			SS			8.10811		0	34	0	185	18.3784	0	18.3784		0.0397		-15.652		41.7072	42.3041	21.5328	73.4169	41.8718	58.9929
10083	10141	WBGene00016913	lam-2			C54D1.5	Q18823	Q18823	MTSILWLFSLAVLWHMGQPQPAELYPSVDPNHFGADGNPCYDRATRQPQRCVPDFVNAAFNLEVQVTNTCGTKRPTKFCVQSGHTGQRSVCETCDDRHEGFSHPAKYLTDFNVGNNETWWQSDTMQEGQQYPTTTNLTLVLGKSFDITYVRLKFISPRPESFTIYKKTHTDSEWEPWQFYSGSCRATYGLSDRAPILPGNEATAQCTKEFSDISPITGGNIAFSTLEGRPSAHAFEESEVLQKWVTASAIRISLNRMNTFGDEVFKDPQVLRSYYYAISDFAVGGRCKCNGHASECVGSSSVDGENRLVCRCEHNTQGADCNECLPFYNDRPWRSGTSVEANECIACNCSQLSNRCYFDQQLFEETGHGGHCIDCQGNTQGVHCEQCIANHWRRPGENY…	1633				flat	NA	NA								BWM			SS			3.85793		0	24	0	1633	1.46969	0	1.46969		0.8872		-11.873		81.1349	95.9322	87.4453	78.0226	93.466	2.40236
16618	16630	WBGene00016918	test-1			C54E4.2	H2KZF8, O44466, U4PLP4	H2KZF8	MRLIVAILACHVAISAAYISSEDLEKPSSADKPVHEKNHCTRSELMRMGGRLVKWFKDVHAQESGADHTLKLHSVPCRVEVGWMFNQWDGNQDGKLSKAELRPIERGGNEACVEEFIDMCDDMVVDGSISVDEWCDCFTFSDDLRHEPPCHKAKHDVDPHLLGVFLPRCDLEGFYKPEQCHDGNCWCVDRYGREFDKSRVQNTLPDCGQYASDMTEEDIAFLRERL	226				flat	NA	NA								BWM			SS			0		0	61	0	226	26.9912	0	26.9912		0.0383		-30.531		56.76	53.8369	30.2456	70.985	44.1538	92.5571
10354	10412	WBGene00016974	lron-15			C56E6.6	Q18902	Q18902	MHSKQKIYFSILLLYFLQNLQVSCLKSHKRTTNDRCSFLGDVHDIWSHCQCISVPSVTAPGIFSQESPIHIMCHHTSSATVLQLPNSETMKGPPPHIVALSMTDGSMAFVQQDAFKHHDIQTLDFSNNQIQTVNVNAFRGLEMKLTQLDLSHNNLSVIPTWALTYLHSLQILHLENNRIDVLRSNTFDETQLNNLQFLYLDNNQLRIIPNLAFNHLRLVVLMLANNRITEIQKMSLPQTLKFLVLRNNLLTQIPYVALNDLKTLQSIDLEGNNITHLMDTNEVTFESEMKVILRNNKVRRLDKHSFRSFRKIRELDISYNQIQTVEDSSFETVGHMQSLDLSYNRIAYLPRGMLKNFAKTLKTLKLAENMIHATPEALRDLRNLTHLNLNGNKLNRIDG…	1275				flat	NA	NA								BWM			SS			2.35294		0	41	0	1275	3.21569	0	3.21569		0.171		-9.895		10.2923	71.1938	72.5866	81.6532	4.5689	9.67821
4231	4293	WBGene00017065	D2092.4			D2092.4	P91194	P91194	MKTSSFLTLITVSVIFLVFLSTHVDAKKKDKNLKVTVADDVAPPAPAKKSKKSAVKEAPAPPPKALSSKHKDDDNSIDDVDEDRIDEILRDASKNLVIFLYDGKVPCPTCTEALSEVEEIDDDIEATGYVQVVKTNDRSVARELGINVFPSLVYYRRKNPILYDGDFKDSETLLRWLRAHEEVATWDLTDDTFESRTDSHSPDEGSIDWFVMFYDADEGNSNAFVPLWETVAHKLRGLVNVGKIEISVNDDVTERFHIEERDCPVFLLFHRGKMYRYKESAKDARSLTNFALHKYKEQRGHRVPEPPTAIEQVYEFAKEKIMDIMDDNQTLSVLGVGGLIVIVAVTLIIKAYRIRAENKNKVA	363				flat	NA	NA								BWM			SS			18.4573		1	49	35	363	3.85675	9.64187	13.4986		0.0052		-30.738		18.3591	56.5782	6.95407	22.1518	16.787	47.8482
5239	5301	WBGene00017362	F10G2.1			F10G2.1	Q22957	Q22957	MKHFLLLAIIGILFLGSTYGASVATEKLKASNCTKTEGFQAIACVLRMADFAQKIEKLDMDDKNQVNEFEKSCVSFANCFETLQCGPEDPAEKKINNMIKNYCDAVVYVAKDFADCSEKLENKNSTCYQNWDPFPDAIDEETDEKKKEKMLQEACKNYFGKDNCLKKEITEKCSETEWKGFRDHFIGISNILLECDFRNIQ	201				flat	NA	NA								BWM			SS			11.9403		0	31	0	201	15.4229	0	15.4229		0.0046		-32.196		29.3491	25.6988	13.0115	38.8406	68.1037	74.4338
16848	16859	WBGene00017374	ttr-41			F10G7.11	Q86NH9	Q86NH9	MKWILAVFLLAGVAIAMRKQGVAVKGVLKCGTAFANNTKVRIVDIDTGPDPDDTLDEKRTGEDGAFALTGSTHELTSIDPVLYIWHECRDEQTPCSRKIKFVIPKKYIHGGTPTDEQWVNIGVLNLEGSFDNEGRECIKD	140				flat	NA	NA								BWM			SS			0		0	11	0	140	7.85714	0	7.85714		0.0106		-33.808		41.7072	28.0619	15.2395	63.6281	57.1088	72.6971
5439	5501	WBGene00017468	F14F9.5			F14F9.5	Q9GUC9	Q9GUC9	MLIQILFLIILTLNCSYSTSYSTSNGIRLMTFNIWNSGANVENGQQKIAKHILMVNPDVVALQEVYANVTRNLTLMLGHPWVAVERNHEYPDTAILTRHVLIPNTNLSTSGAVGVKIMLRTGFMIHFWSLHLDYTSYGPYAANNKLVDKLDQIMAGENVGRGPQIYEILNLPMMKKWMEKVEDVPIFIAGDFNGPSHLDWTEQTKKIHGDWVIRWPATKELEEREFSDTFREIYPNVVSDPGITWSTVNKFNPEWNYTIPEPQDRIDFLFYKGPVVPYQILTYSGCEKPQRIPFHSKNDYPSDHFAVFADYTFI	314				flat	NA	NA								BWM			SS			6.6879		0	23	0	314	7.32484	0	7.32484		0.1219		-10.454		23.719	39.0248	5.52198	62.5522	20.2506	49.6684
16842	16853	WBGene00017688	ttr-35			F22A3.2	Q19694	Q19694	MISKLLILGTCVLSVVLAASESHSGRQNYRVKGAFRCGNVPVKNVQVKLIDDDFGSDPDDDLGSGYTNANGEFELSGSTTELTTIDPHLKIYHDCDDGINPCQRRWKFELPNNYIYSDTDTPKTFDIGIWNLEGILPGESRDCNH	145				flat	NA	NA								BWM			SS			7.58621		0	29	0	145	20	0	20		0.0055		-20.101		46.9295	42.3041	18.8578	75.8217	58.3296	83.014
6298	6359	WBGene00018055	F35F10.5			F35F10.5	Q9GYU3	Q9GYU3	MSYFPILLAFGLLAVVFGAEPTSEKCKEEEKLVKQCLKNLPRSYKLSNTGLILENKEYKDESQKCLDQLTCDLSKSAFKVQAVTQEIMEKFGEIASCFHNAYPKVKEMCARKTNASNKDCSNYEENVKCIEEDLAKTRFCSQPDIENFKTFSHLIVETCKATVEYQKAAQ	170				flat	NA	NA								BWM			SS			0		0	25	0	170	14.7059	0	14.7059		0.0026		-31.743		34.9005	25.6988	37.5289	39.7568	68.1037	65.9175
6571	6632	WBGene00018271	F41C3.5			F41C3.5	P52717	P52717	MKTLLLLAFFVGVTCGEEIKDLPGLDFEPNFKHYSGFFQVSDNHVLHYWFVESQNEPSNDPLIFWFNGGPGCSSLDGLLNEMGPYVANEDGKTLRENEYSWNKMASVVYIESPAGVGYSYATDGNITTNDDLTSLENYEAVKQFFTEFPQFRHHQTFIMGESYGGVYVPTLTARIVDGQKDFPINLKGMALGNGYVNEKLNIDTSVRFAYGHGLIDEKIWNTLERDCCRGCIDSCDLTQVTGHCATLVEDIFQFLWFGGLNPYDLYRDCDPNPSVNSKRMKHMLRGVAPAMAHFDELLKNQTKTSLYQFLKNKSQSQKPLKADVPCLNDTEMLSYMNNPKVRKAIHIPFNLGKWDICSDKVTTTYQKQYTDMTPFIKKIVKNHVRVLLYYGDTDMACNF…	469				flat	NA	NA								BWM			SS			0		0	19	0	469	4.05117	0	4.05117		0.0069		-13.757		31.044	45.8413	18.8578	74.65	41.8718	60.5625
6616	6677	WBGene00018311	F41G4.8			F41G4.8	Q95YA4	Q95YA4	MLFKFLYLLSAAVSCQFQDFEGSGEEALIDEYWLQRLIENVGIPHYLTQKAYQLTANAKEHVDEDEILTLDASVPDYARQVFTTQVLSTDGLSQETLQNSTEKFMTVVYFAFRPFGCDQDNIWPSVYNLTRDNLDCLAFTLLQRIYDKSEFTRKYFARAIHFGLTSTAPMNHRIHEMMVYQYLLPTLDRVWFNSMKIQFKNSFWNEQEYSRKSTYEDNSFLCGSFPFSDEVQEKINYYFNSR	242				flat	NA	NA								BWM			SS			0		0	16	0	242	6.61157	0	6.61157		0.0038		-19.097		27.4552	44.6156	4.51486	57.7598	54.7015	65.1363
16854	16865	WBGene00019203	ttr-47			H14N18.3	O61977	O61977	MKLIVILCLLAVAVAASIIGKKAVGAKGTLLCGNTPASNVRVRLFRVKPGKKDDINQMLDEEYTGPQGMFHVEGNTNGFPLNETDLHPVLSIYHHCDDDPKKLEKTAFRRFNYVLPDTFVNQGEKAKKTYDLGSLNIQLEFPNEKREKTILEKAN	155				flat	NA	NA								BWM			SS			10.9677		0	18	0	155	11.6129	0	11.6129		0.0065		-19.601		55.6104	31.7367	26.2442	68.3911	79.0027	87.7401
3379	3441	WBGene00019328	clec-149			K02F3.5	Q21146	Q21146	MTASLILLPVLLNILYQPAGSSLPTFSPGNKHLCEGFGFNWAAEIRCLRDIINDCEEGTQEKSRGGRSLQRSEFPTDNTPQADYGNPYSYPRPYSRTYHRNSISPIRPPVPMPIPQISQGCNCNHDIEALEAKFDKKLYEVKMHAQYETEKGVGDLRKQFETDLREYERITTKDIVEIKRHLDYLQAPRITNNDLEYFFIQREESWYTASEKCIGYGAHLASIHSRLELGFVQRLVPVNQTAWIGVNDIQKENVFRNSDGTPVDFYKWGKKQPDNQEHNENCVEVDHSGQWTDKLCIITRPFVCKKKI	308				flat	NA	NA								BWM			SS			12.3377		1	74	63	308	3.57143	20.4545	24.026		0.2308		-0.483		62.4146	58.2486	17.9317	86.8435	47.5215	86.4603
9503	9562	WBGene00019332	K02F3.9			K02F3.9	Q21151	Q21151	MTSSNKILLVFLLFFCIQDVASENGLDVSALSGKSKKFFFDMTKQVMGVPSLKPENLAAQAFFRSFLDKYTKLDDKVKNDMTQHVPKATKLFDAAAKKYNIDPSSAFKMLSTFFETFKKGASSEMASKGLQMAGKLLGGKGSGGGGGLLGFLGTRR	156				flat	NA	NA								BWM			SS			12.8205		0	43	0	156	27.5641	0	27.5641		0.0186		-20.7		49.8428	34.2913	25.3918	56.5291	92.4638	78.3616
9598	9657	WBGene00019407	K05F1.5			K05F1.5	Q21241	Q21241	MHLRTLHFLILIGIFIGGQTLGCMKKVCGNNAKNDFRRCPDTDGSCGNYHTERTSGEIIDGVDVRCHLGEPIYAPIEGEMYFWRPYGGKREKSCADQGVRIEGTGQWQGYAVHISSVKLSFFGGHVEAGDEIGEALNRYCFNDRGQNDVEPHVEIRLYKEGRLIDPTHHLQNCMCTGQICESNTRNVLLGDPFKTDKRYNGVRGWDVECQMIDDDDEDSPRAPMIYSPIAGEIVGRIRLFTDSNGAYTGCDNDGIFIVGIDDWLGFEARLYNVKARADIGFGRKRIIQGEPIATRLACENSPDSVFVEIRFEGRVVNITDIITAANCKTPNFPVF	335				flat	NA	NA								BWM			SS			5.37313		0	15	0	335	4.47761	0	4.47761		0.1791		-23.25		37.3053	15.6276	6.61263	62.5522	34.8219	55.4041
9868	9927	WBGene00019624	K10C9.3			K10C9.3	O61887	O61887	MKLLLLLCISCIPLAYSHDGEPFDYLMFTTIYPTAVCRADDDSVPESCEIPSGTPQWSIHGLWPNFENGSYPQNCRGTPRHFDENLIKSIEDRLVVVWPNLYPKKTIQSFWKHEYDKHGTCAQSEKLFESELAYFTEVMKVFDSIDVAGGLKSVGPSEKPITSSDLKNALSGVTSGKTFQFHCLRDKKTKQFLLGDIRLCLNKDLTIRDCPTDGKHPNRVSRFERSIGRNRRGPPLPSFQPCPAEFIYLPEMSSISKSSDSTSPSIFGRIWSAIKNIGN	279				flat	NA	NA								BWM			SS			6.45161		0	37	0	279	13.2616	0	13.2616		0.101		-20.142		55.8143	34.2913	40.8622	70.985	41.8718	91.0931
9913	9972	WBGene00019647	K11D12.7			K11D12.7	O44622	O44622	MLKVLLAIGLLCLIDVSAQFRAECEHPLHFGVQQCTNTSVVRYHFDMESKKCLAFKYTGCGGNENNFKDYSACSNFCIPMDYFTCPGGSDSVAGKNGKSHCGGMEQLKCDGPNTFCLNGPFTGICCDTRIRDKIDADYAKECGPGKLKHQIDIGGVKIPMFGKTCDSTFCPAYTKCHQGNYFAYCCA	187				flat	NA	NA								BWM			SS			0		0	17	0	187	9.09091	0	9.09091		0.0245		-15.098		58.6097	17.6247	15.2395	74.65	92.4638	82.2574
12911	12939	WBGene00020106	R151.1			R151.1	A0A0K3ARV6, A0A0K3AX69, A0A0K3AUV8, A0A0K3ARA3	A0A0K3ARA3	MRIHLYLILLLIHIFLQNKSNAFEQRSDCVESCSHLDTSQEFGDCLAKCSKRPRKDNLGDSHLFAMPPTNVEIETKVIMDGGKILETTINWKADEKDTRREGFYIRYTAVNSTCQKHFPGYFTSSILPDERSLTIPSAFNGHALVIDHSCSYHLQIRAKPYPPGDDKYIIERRHTVPDCIDKYCSCRPGDVAAIRDVSVDAEYRLNWKFDEMKGREYQFYVDVYERIAMPLIKKKGSEPESEEYTFRIANADSYEISAKSAETSAHTYQYQLPFQFTPFQQYKISIFAVDDSFCHNQDVFHIFNTTNATFSSSEIPKTTPIPEISGSAITKTTMLMESSILVIFLIVVACMSPICTMIVLLCLRRRKKEIKKRHHFLHRRSLSCSRHSIIETNILYRPP…	696				flat	NA	NA								BWM			SS			8.76068		1	64	38	468	5.55556	8.11966	13.6752		0.3831		-12.211		14.2643	61.5279	30.2456	19.1059	4.7605	14.4952
15458	15478	WBGene00020195	T03G6.3			T03G6.3	Q22129	Q22129	MNLVLILLGLVLGSAARDPIGQNLIVILADGYGATLLNNTKPDATFGIRHLATNGVQVDYVTPSFPTHTWPQWMSLSTGLYTENHGFTADYMWDRKTNFTFERGTGPNDTEDVWWDDAKAPLWYTAGKAGVDVHCYWFAHCHRAFYDMVVQVPEKRWANLDDQHQTDNLRDIFPEIANRISKYQVYKQQMFLIRYANIGNAQKEHGPESDEVEQEVARFDLYINELQQLLEDRGLFSSTNLVVMSDHGYTPLQKEEQFFMEQCLPDYSLVKKVVNSHSMIMVFTNPEDEGTVHYEFSVCEVWSPMGDYDENDTPFVKTYRMSELPDDLHWKNSRFMSGVVLITKPGTSVVTKELPTVPHSGDPTIDAKQASGWEPYHDDMKGIFVARGPAFRENERFGP…	465				flat	NA	NA								BWM			SS			2.36559		0	29	0	465	6.23656	0	6.23656		0.005		-15.314		26.9148	62.169	25.3918	46.2073	27.0376	49.6684
15674	15694	WBGene00020330	T07H6.1			T07H6.1	H2L0K7, Q8T3D3	H2L0K7	MRELLLLLTFIFSWANGQLLEKSRSVWVEQGLVRGNIYNIDGKHIQIFRGVPYAEPPIGELRFKPPVKKTRWHQELPAVEYGPPCLQFMDFHKNDKFAKTNMDRQSEDCLYLNVFSPYDTDDESKTYPILVWIHGGSFLAGSADTGIDMEVIAANIVSKGIAFVSINYRLGPLGFMNYQNGDKLEGNFGIWDMVMALQWIQSNIKQFNGDPTKVTVMGESAGGAASSLLALSPKTSGLLHQAIIMSGSSMAGWAIHRHSQPAYSVDNLVAYFRCEKWINEDDTKEVVGDEYQHLTHSVIRSALCNYQNVKINCLTDDMTQMDKMNCLRKELNFSSPLFRKALAAELGVSKMVVDGDLVPSSGVSLVRNNARIPIMTGVARKEWGHKKAMFYNMHQRDGL…	697				flat	NA	NA								BWM			SS			7.10383		0	20	0	183	10.929	0	10.929		0.163		-10.502		19.0445	70.2555	32.0757	19.6807	24.8489	15.016
16026	16045	WBGene00020617	T20D4.11			T20D4.11	P91464	P91464	MRGFFKLALLASVLLALAYGDDGYNEASELERRRIRDCPEVTFKRMAGCVWEFGGFLKKVLFLDLEQRTLDKFRKSCVSMATCFDLIECKETGKFSRGKRIKDSCDVMNYLSKNFVPCLRRLEKLNPAPTCFKKWKPFYDLNEVGPDTTPEEMEELCKNMLGKDNCMKDLVGRTCGGAMSQELVDRFEETSVFKQCDAD	199				flat	NA	NA								BWM			SS			6.03015		0	21	0	199	10.5528	0	10.5528		0.0184		-37.702		41.2847	28.0619	26.2442	55.2788	68.1037	91.5598
10190	10248	WBGene00020836	lgc-34			T27A1.4	O17274	O17274	MRNIFLFLVLLSIGVCSAQKAFHSRRLGTEGQIVGRILSEYDSSSRPPVRDHADNSAILVITNIFINRLIWHNNYAEVDLYLRQQWQDSRLKYDVDTREGIDEIRLPGNRKIWEPDTYFTSGKELSRNEKNSKHIVVEPSGYIRSSERVLLELPYAYGTMFPFTNSRQFTIKLGSYNYDIDDIVYLWANSPPLVNPIEVSQDLLKGDLTFEEASAGDCVGNYTVGVYSCIDAHVYFSASTISGLMSWFLPSLFLLIGSWLHFWIHGSWSVPRTISAAVPFFILAAYYIFMREDSYTQAQGAWLAFCLVLTFFSFVEYFLVICCGGRRSIRYKTLGPQEDHPMGAAKETVEVAYNEGCASFRDNNGIDVISRVAFPIVTIVFLIIYFIFIV	390				flat	NA	NA								BWM			SS			3.84615		1	77	38	390	10	9.74359	19.7436		0.0183		-20.619		11.8202	7.76959	3.65512	26.4309	16.2736	25.8806
16375	16393	WBGene00020869	T28A11.2			T28A11.2	A5HU97	A5HU97	MKHCLLLVMVFVGSAHCASQLEKLKSENCTEADKFLEMSCLLRMKDFLAKVDELDVKNNEKVAEFDKSCTQLTACLRTLQCGPENPERKRKLKLIRNYCDGIVYVTQNFTECDKKLESKNSTCYSAWDPFPENFEEELDENKKKQMLQENCKDYFGKDNCMKKEITETCGEDEWVKFRAHFIGVGNVLSDCDLKKALKDV	200				flat	NA	NA								BWM			SS			0		0	31	0	200	15.5	0	15.5		0.0104		-36.518		44.0948	25.6988	39.9975	67.1408	69.5185	78.3616
16371	16389	WBGene00020878	T28A11.16			T28A11.16	P91512	P91512	MRCSIKLAVLGAVLLAFACSSNQAPSNETSIIESELGTNCTTVTFKNFLGCLYRFGDFMAKMYFLDVTKQKSLEKFHKSCNSMADCIENLECHKDKNLTDSKTMRNACETLKFFVTDFFTCLEKIGELKPEPQCFKEWNPFEGFNDKEKNQEELCKNMMGKDNCMKKLVSENCGEEDLRKLYNMFKFAEVFKQCDASKL	199				flat	NA	NA								BWM			SS			6.03015		1	38	31	199	3.51759	15.5779	19.0955		0.0147		-25.874		41.9258	31.7367	33.7951	43.2302	82.6333	84.4412
16868	16879	WBGene00020886	ttr-6			T28B4.3	O17345	O17345	MRSVLIVCALFGVAASIEMFGRDQSSAVRGKLICDGRPASGVLVKLWDKDTLDSDDLLDSGTTDGNGDFHLAGWTKEYTPIDVKLNIYHDCNDGIKPCQRKFGIKIPDSYTSSGKVPKKVYDAGVIQLAGSYPGESRDCIH	141				flat	NA	NA								BWM			SS			14.8936		0	18	0	141	12.766	0	12.766		0.014		-26.801		39.5775	34.2913	23.4439	56.5291	54.7015	76.0771
18651	18658	WBGene00021161	Y4C6B.7			Y4C6B.7	V6CKD2, Q7YZG3	Q7YZG3	MTAKIGFLLILAVISTVSALRCFEGTVALDSNDQTSKKECGGMSNYCIQRIDKKTKEMRRECSSWSDEHSMEEKCPMTGCHFQTKDSTFCCCQFDECNEWKGDGTEFKAGETSSKSKAVPSAPKLGDVIMPTAATRKNKSEDIVQIPTTVAPTRKSSFVELP	162				flat	NA	NA								BWM			SS			7.40741		1	84	61	162	14.1975	37.6543	51.8519		0.0298		-32.16		60.5797	42.3041	36.6372	45.1511	66.5979	79.8772
11217	11266	WBGene00021893	ndnf-1			Y54G2A.29	Q9N397	Q9N397	MLKLLLLLFTIQLCTPFHVVPMSYSILSENTESVIDLAGKVSEKRFYLHITNEASPFFMYVTPCGAAVHWQLFTMDKDISMSEEFDTISDMSNSLEESEKFKLIAGEDDKKRMTFFAHSLPKKVILVVRAASTSSASVRIFFTPSLFRLEDQYPPLPHDTRLATNIISESTYSRRDEVSTLITWKISPQVRNAEPGRYRICTIVSRRDPEFAGMCDHVEEGVETVKCVPQTNNTVVIGSLRRDRTYFVTVFVRDHKRGTSSAYEVQTIQTSEVVTHRRKVTRNVPRKQKKSAPRVLSNGQLEQVELEPKKGTFVNLKFFVNSLPEGAENNTQSAMLIVHACDGLVRINLFRNGKILKRSDAFSGFRRFVVTNIRSGHLRFQIVNDDETPKTIRVWASTD…	536				flat	NA	NA								BWM			SS			3.73134		0	50	0	536	9.32836	0	9.32836		0.0509		-22.076		26.3572	45.8413	48.6883	27.777	6.53402	32.9108
3841	3903	WBGene00022072	cpg-9			Y67D8C.8	Q95XP7	Q95XP7	MHLWQLVLLVILFFGAAFGADLEGSGSGDVSTDAKEAILNAQTLLDAVSSDGSGADVEASGEDVQTFFF	69				flat	NA	NA								BWM			SS			0		1	63	33	69	43.4783	47.8261	91.3043		0.0329		-29.659		47.6075	28.0619	14.4461	70.985	85.6915	79.0862
19226	19233	WBGene00022100	Y69A2AR.31			Y69A2AR.31	Q95XG5	Q95XG5	MSPWLLILLLYSLFESSASYDSCLHYRSICLRNDTCNQHLKRFQTTCGYDLNVCSGTSPSDCVYYLHRIREIFPTKSCTCYEAIGFSQECDFFRQIIWNHSCERKMRDVGEEIKLNNRKILRIETNRMQNVQKHPETSLRRTTRTPVADQIHQWKTQLSGELTKSKIEQKTCDAALYQVCLKHVSCSQLWSMFRKNCDVDLDNQCRMADREVCWQSFEGLTWSGLGDCQCASSNSSDCHWIRLHTNYNKCIYEISKSGQFPVLMTLAQKNREAEENKQRAMSEQYRRRYENREQSEYILREVPTTTTTTTTTTVPPTTTRTTTTTTPRPTVPTVPRTTTVPSWWSSAQAPRHRDTSPRQGFRLKAVIDPTPTVAQENYYTYQGSKMEFPPAFRPRKSSL…	1066				flat	NA	NA								BWM			SS			16.8856		2	393	349	1066	4.12758	32.7392	36.8668		0.7123		-5.186		19.6856	73.434	79.5578	7.97101	1.32154	21.8153
19350	19357	WBGene00022194	Y71H2B.4			Y71H2B.4	Q9N4F0	Q9N4F0	MRIALIFLVLLVSFASSCKNFDKYMNMFCRYGLEQSPCTVEDYSTYKSACCAMKNNCSYKEFPKDDVCCFTVECLKRCFPEKLLKNDKVY	90				flat	NA	NA								BWM			SS			0		0	6	0	90	6.66667	0	6.66667		0.0503		-28.283		41.4861	26.8902	11.0391	68.3911	65.2837	87.7401
13526	13553	WBGene00022242	sfrp-1			Y73B6BL.21	V6CLQ6, A0A0K3ARM8, V6CLM0, Q9GUF5	Q9GUF5	MMLFPVLYILFAFSVTNGYLEDSWAMFSSERPVGPKCVDIPSNLSICNGIEYTQMRLPNILEHETVSEAIHASKDWESLLRLNCHPDTQRFLCSLFAPVCLMQMDRLILPCKSLCMAVKQGCENRMANYGFPWPEMLSCEKFEDDDMCIKPMQPAKPPAGSSTTCTACSQVATYENLVDQFCRSHLVLKAKVIRDSPTHIRVRNGRSLKKGERRRGVSDVEIRLSSESDGSCPCNIPVKNQNEKLLVMASRQPDGKYLANLVLPWQKEKNFKRAIHQFQRLNCQSLGREIRESASRRPHYYEMRRHNTGRYQMF	314				flat	NA	NA								BWM			SS			0		0	52	0	260	20	0	20		0.1073		-18.67		65.0233	54.7949	51.7416	74.65	35.7775	81.4419
155	223	WBGene00022770	acp-1			ZK563.6	Q23534	Q23534	MRVLFYVSILVIIASVHTQLISVHVIFRHGARAPVLNVTSEEAKSYFYRGLGQLTDEGFEQARLMGKVLRDRYVNSFVDARMLSSQLLFRSSPVERCLMTLQTVGNTMFPNATPPVQTVAKPDDFLLVPKLDCDFQLGEWDNYFNLTESDKKMARKNPWFVSDKALRKAVTKTDFLQDRGGENLPALILEKEAGLAVPSWFNEGAYKESLHVFYSALAVMSSVGEYKSSKGIRIKSGLLMEKVFNDIQEKVRCHEKKEVSNIKCDIHKLQVFSSHDLLILPILETLGIREEVLGKDMPPEFMSTIIIETMIVDNSPVVKVLFRKNPREITLRDVTGFVKNCPPGQPLCPVQRFTSCCNEFITSDPKSECYAETTVEKQSEWVMTPLSWIIVAIAILLLI…	426				flat	NA	NA								BWM			SS			3.52113		0	38	0	426	8.92019	0	8.92019		0.0045		-17.769		16.7428	11.8251	30.2456	22.8101	13.1491	44.8514
12071	12115	WBGene00022801	pcp-5			ZK688.6	P34676	P34676	MNIFISLAILIATTHCLTLLRDPVTQNGASKFEKSIGKYKYEEGYLKAPIDPFAFTNDLEFDLRYFLNIDHYETGGPILFYTGNEGSLEAFAENTGFMWDLAPELKAAVVFVEHRFYGKSQPFKNESYTDIRHLGYLSSQQALADFALSVQFFKNEKIKGAQKSAVIAFGGSYGGMLSAWFRIKYPHIVDGAIAASAPVFWFTDSNIPEDVYDFIVTRAFLDAGCNRKAIEKGWIALDELAKSDSGRQYLNVLYKLDPKSKLENKDDIGFLKQYIRESMEAMAMVNYPYPTSFLSSLPAWPVKEACKSASQPGKTQEESAEQLYKIVNLYYNYTGDKSTHCANAAKCDSAYGSLGDPLGWPFQTCTEMVMPLCGSGYPNDFFWKDCPFTSEKYAEFCMQ…	507				flat	NA	NA								BWM			SS			0		1	41	35	507	1.18343	6.90335	8.08679		0.026		-12.858		16.6347	47.9833	4.07517	19.1059	92.4638	27.1457
15300	15321	WBGene00023417	swm-1			C25E10.9	Q18158	Q18158	MRILVIITCIVAVATATKTCEANEELVSCHNTCEPQCGYTPKACTEQCIMNTCDCKDGFVRNSLGKCVEVSECTKETTKCPENETFFGCGTACEATCEKPNPTVCTKQCIVNVCQCSKGFVRHGLRCIDKKDCPK	135				flat	NA	NA								BWM			SS			0		0	16	0	135	11.8519	0	11.8519		0.2214		-38.914		36.2	13.1147	22.4662	51.663	43.0189	76.0771
11930	11974	WBGene00043050	oig-4			R07G3.9	Q5WRU0	Q5WRU0	MSFRLWGRCIFFFCFLLEAIDSRGGRRGGKGKGKSNLQFAQVAEFSLVQTVLSDNRSAQIITGSHFSQTYRLGYKLLIICKARGDPRPTIKWYKEGAEIQPKASIHYYEKPIENDTIWSKLEVDPATMGDQGVYACVANNPHGVMAKNFKAEYTY	155				flat	NA	NA								BWM			SS			7.74194		1	36	36	155	0	23.2258	23.2258		0.0151		-17.263		43.3898	22.0437	9.35888	58.9732	69.5185	68.4107
12537	12566	WBGene00044021	R02E4.2			R02E4.2	Q2L6X1	Q2L6X1	MRCTSVSASLFFFYLSIRNVFTYTAHIEDPSRIELDMFDWTAGVRVAYCVDSPLPDLISPFRRTMAKVVTKYCQNATACNLRSSLIFGPEQIVILEGFPRRESLTIQIKFFVLLPHSSNPNLRQQRPFLPRQVLSDILQKHHQEIANRLGWHIIAYERYPRFDSMTEFMNVAIIPIVIVSLSLMVFLAYWVSTLRPNSGSDTWMVTGSAGGKNAALRRTMEIIAEQNEEYERQERYALTKHVVATSGHEGITTTGELLLNVARLSMASSQAPSSAQSPQIFIQPGSSSSSSVPRTSIVSLHGGKELLHVKPRHSRRPSSVEEIKKARRMRGHRKSESKQWKSGSLMLAGFRRT	353				flat	NA	NA								BWM			SS			13.3144		1	145	130	353	4.24929	36.8272	41.0765		0.3958		-9.953		29.973	21.0685	30.2456	44.1562	23.4586	37.6738
4176	4238	WBGene00044082	D1086.12			D1086.12	Q5FC37, B5U8P0, Q5FC38	Q5FC37	MIVLFLTFLTFFTYTIECIPNVTVNEFSADLQKEGRSDPYLMCTMISQTLGNWKLFFEAHHWGSPETLNLTSEEFNQINNICEREAISRSCFLPRLMLKIVCKKVDVLQSEFGKCMKDVQTMKIESEIFESFAKDFSFDGISKKCRLLQDPKMPTDIGETCGEEAQLSFTKKRRLLYYIFDC	182				flat	NA	NA								BWM			SS			5.49451		0	6	0	182	3.2967	0	3.2967		0.0029		-23.571		36.7477	16.2122	18.8578	58.9732	47.5215	85.1437
13807	13834	WBGene00044283	spp-22			ZK867.3	Q3S1M3	Q3S1M3	MVQIINRILISVSIFYLCYAHPYKTNAKDLEKDRMLTTNEYYVEKVNQMAGISCDLCMRAVYGVNYDFIQLKKDFIEMIRLDCEALFHERPEDISECIRFLTTKVEKYSGKVEKILDSRHVCVLLRVCAASDEDYVLKNKLSSNKTDMQ	149				flat	NA	NA								BWM			SS			0		0	18	0	149	12.0805	0	12.0805		0.0035		-26.06		22.4908	24.4461	9.85753	43.2302	47.5215	59.7765
17689	17696	WBGene00044452	Y102E9.5			Y102E9.5	Q4PIV1	Q4PIV1	MTLLIASLLVTLLVIFEQISSVGTHISSNSLSRYCKPKRYEYNSQWCKGPIDGDCNPYNCGGGCESKYIRFYDQSYKMDRTIKSCFCQQERLCSILGMHAFSGCKSYYQLSSVAQKFVRFWSMDNLDRKNRHSNNVRHRYSDKTRHFQLINGRSRFCCRATAQKRLALHLKSSSLNFKIILVLLPIVYPLIY	192				flat	NA	NA								BWM			SS			14.5833		1	50	39	192	5.72917	20.3125	26.0417		0.0583		-13.995		50.3439	19.2041	16.9934	85.5809	68.1037	75.2665
16843	16854	WBGene00044605	ttr-36			F22A3.7	Q45EK1	Q45EK1	MMKTLVLTLLLIGGAFAFRTQSTGVKGRLMCGSKPAAGVNLKLFDEDNGPDPDDVLDQKTTDDDGNFLLSGSSMELTPIDPELRIFHDCNDQGSPCQREWVIRIPAKYITNGPEVKEIMDLGVLNLEIELDNESRSCAH	139				flat	NA	NA								BWM			SS			10.0719		0	20	0	139	14.3885	0	14.3885		0.0029		-25.269		51.3412	35.5072	31.1815	70.985	68.1037	91.0931
205	273	WBGene00000063	act-1			T04C12.6	P0DM41	P0DM41	MCDDEVAALVVDNGSGMCKAGFAGDDAPRAVFPSIVGRPRHQGVMVGMGQKDSYVGDEAQSKRGILTLKYPIEHGIVTNWDDMEKIWHHTFYNELRVAPEEHPVLLTEAPLNPKANREKMTQIMFETFNTPAMYVAIQAVLSLYASGRTTGVVLDSGDGVTHTVPIYEGYALPHAILRLDLAGRDLTDYLMKILTERGYSFTTTAEREIVRDIKEKLCYVALDFEQEMATAASSSSLEKSYELPDGQVITVGNERFRCPEAMFQPSFLGMESAGIHETSYNSIMKCDIDIRKDLYANTVLSGGTTMYPGIADRMQKEITALAPSTMKIKIIAPPERKYSVWIGGSILASLSTFQQMWISKQEYDESGPSIVHRKCF	376				flat	NA	NA								BWM						0										0.0141		-17.627		21.1938	18.3837	20.6436	28.4869	34.8219	27.1457
207	275	WBGene00000065	act-3			T04C12.4	P0DM42	P0DM42	MCDDEVAALVVDNGSGMCKAGFAGDDAPRAVFPSIVGRPRHQGVMVGMGQKDSYVGDEAQSKRGILTLKYPIEHGIVTNWDDMEKIWHHTFYNELRVAPEEHPVLLTEAPLNPKANREKMTQIMFETFNTPAMYVAIQAVLSLYASGRTTGVVLDSGDGVTHTVPIYEGYALPHAILRLDLAGRDLTDYLMKILTERGYSFTTTAEREIVRDIKEKLCYVALDFEQEMATAASSSSLEKSYELPDGQVITVGNERFRCPEAMFQPSFLGMESAGIHETSYNSIMKCDIDIRKDLYANTVLSGGTTMYPGIADRMQKEITALAPSTMKIKIIAPPERKYSVWIGGSILASLSTFQQMWISKQEYDESGPSIVHRKCF	376				flat	NA	NA								BWM						0		0	8	0	376	2.12766	0	2.12766		0.0141		-17.627		21.1938	18.3837	20.6436	28.4869	34.8219	27.1457
300	367	WBGene00000114	alh-8			F13D12.4	P52713, Q7JMI1	P52713	MLSRLARVQPKCQQLAHFSTSKSAAAAPTVKLWIDGQAVESKTTDFVELTNPATNEVIAMVPNATQAEMQAAVDSAKNAFNTWKNTSPLTRQQCMFKLQALIKRDMKKLAESITIEQGKTLPDAEGDVSRGLQVVEHACSVPSLMMGETLPNVSRDMDTHSYRIPLGVTAGICPFNFPAMIPLWMFPVALATGNTMVIKPSEQDPGAAQLLVELAKEAGVPDGCVNIIHGQHSAVNFICDNPDIKAISFVGGDAAGKHIYERGAKNGKRVQSNMGAKNHGVIMADANKEQTLNQLTAAAFGAAGQRCMALTTAVLVGEARAWLPELVEKAKNLKVNAGWKPDTDIGPLISKQSKARVLRLIESAKKEGAQVPLDGSNITVPGFENGNFVGPTILAGVKP…	523				flat	NA	NA								BWM						2.86807		0	38	0	523	7.26577	0	7.26577		0.0949		-6.659		41.4861	70.7566	32.96	42.3409	77.7499	13.0656
292	360	WBGene00000118	alh-12			Y69F12A.2	Q7Z1Q2, Q7Z1Q3	Q7Z1Q3	MVFTVPSDLSGGLYFLNGKRTTIESTETFDVIEPRIGQVVAKCPKATADIVDQYVKAAADAQSAWGETTALDRGKVLHKVADLIREHAEEIAIWEVKTNGKPIYEARCDIASSADTFDFFGGIATAVLQGDSLELPGGPSQRIAYTRREPYGVVGCIGAWNYPFQTCVWKVAPALAAGNAVVYKPSPFAPASPVLLGEILTAAGVPKGVYNVIQGEQEAGVALCEHNLVAKVSFTGSVASGEAVQRQAATKNVKPVTLELGGKSEIIIFDDSDVKSAVASAMLANFLNQGQVCTNATRVFVQKGILASFTEAIVQEANDKLKVGDPLLEDTRVGANINEGHLQRILGYVESAKQEGGVVLRGGVRVHPTGVEGGAYFEPAIITGLSDEARAVREEIFGA…	499				flat	NA	NA								BWM						2.20441		0	12	0	499	2.40481	0	2.40481		0.0066		-7.577		9.82068	30.5036	2.43429	9.72488	51.0366	7.77205
376	443	WBGene00000177	aqp-9			K07A1.16	E5QCH4, Q7JL16	Q7JL16	MRIWVASLIFYGSVFAICELLRFLVIKSFDNSKRLSALLILEFIGTLQICVPMFDVGTILDNYGLLGVFVEITVIELANCYFQRDAVAHPCPLVTNCYRKSKAIRRGIYVFLVQLAAAYLSYFVARLFWSIGVHPIHLELLDAESCSSDLTVAITTGCIIEGVATFVAKWFEKYVDERYDGETKLCSIANCLFSGLLCAIGINYTGMYANPIVAWACTFNCLGVSHAGHLFVYWLSPLIAWYFAEIVFGSEDVLEEESEEQEKDTKKKE	269				flat	NA	NA								BWM						5.57621		0	19	0	269	7.0632	0	7.0632		0.0205		-25.739		9.04937	5.01105	2.30901	28.4869	35.7775	31.3731
444	511	WBGene00000211	asm-1			B0252.2	Q10916	Q10916	MRIIYLISTVLLIYTNATVLRTKESIQNKVTYDKYGFQPLCISCTGLISVASFFLKFDVSEPVILEFATIVCKLFAKQPWAVCDGISSQFRDEFFYVFRRLANESPSQICGIILPDCADPTDPSESGWMVALPPKPKRTRISKKKVQKKPNMSMSQNLNVLQLTDLHVDFEYKYPSEANCDDPVCCRVSVSEPKKAAGYWGSVGKCDIPFWTVENMLSHINKTHMIDMVIMTGDYINHVDWEYSIEEHLSVLRKLHRLVQNTFPSTPIYWALGNHEGVPVNSFAPHSVDERFWPTWLYKEFQTMSGPWLSEGAKDSLLKRGSYSTQVMDGLKLITLNTGFCEVTNFFLYLNQSDPDSSMSWFVKELFESEKKGEQVYVLAHIPPGDSECLEGWAFNYYR…	564				flat	NA	NA								BWM						0		0	51	0	564	9.04255	0	9.04255		0.0217		-11.779		19.3368	41.2479	28.2682	30.0295	20.8401	34.9619
838	905	WBGene00000245	bca-1			T13C5.5	Q22460	Q22460	MNKILRGVIQFRNTIRKDLVKQFEEIKNNPSPTAVMFTCMDSRMLPTRFTQSQVGDMFVVRNAGNMIPDAPNYGAFSEVSVNTEPAALELAVKRGGIRHIVVCGHSDCKAINTLYGLHQCPKNFDVTSPMDHWVRRNGFASVKRLNERLHRGPSSMKFESEVAPSQSFDAIIDPMDTLAMEDKLSQINVLQQLINICSHEFLKEYLESGRLHIHGMWFDIYKGEDYLFSKDKKRFVVIDEKTVTDLLAELNARYPVPEDQDGPVAFAKSN	270				flat	NA	NA								BWM						0		0	13	0	270	4.81481	0	4.81481		0.0214		-8.474		49.5898	60.0197	20.6436	67.1408	51.0366	60.5625
3821	3883	WBGene00000768	cor-1			R01H10.3	Q21624	Q21624	MAQIVRQSKFRHVFCKPVKHESCMSDIRVTEITWDSLFCDVNPKFIAFINRGAGGPFMVIPVNKIGRVDKDYPFVDAHKAPCLEVAWSPFNDNVIASCSEDTTCKVWVIPDRGLNRNLSEPAVELTGHQKRVNTIAWHPVANNVLLTAGGENVMFMWNVGTGEALLEISGHPDQIWSINFNFDGSQFVTTCKDKKIRILDSHTGEVVHEGMGHEGVKPQRAIFVKDGLILSTGFTKRSERLYALRAPEDLSTPIVEEELDTSNGVVFPFYDEDSGLVYLVGKGDCAIRYYEVNNDAPYVHYINTYTTNEPQRAVGFQSKRGMSSEENEINRIYKLTTKGVVDILQFFVPRKSDLFQHDLYPDTRSTIPALTAEEFMEGKNAAPNRQPVNAAAAAAAAKP…	605				flat	NA	NA								BWM						19.3388		1	214	173	605	6.77686	28.595	35.3719		0.9564		-7.186		63.1123	88.6121	45.3476	24.6401	17.298	17.4404
3848	3910	WBGene00000779	cpn-3			F28H1.2	O01542	O01542	MANRTTAGGIGFAVRQKQDSKFIDKEATLLLEWIKKLSGENISTSGERDNFHNLLKDGTLLCKAANGIEAGSIKKVQKPISTFACMENINAFVEFAKKQGVPNEETFQSVELVEGRDLFSVCVTLLSLGRVLQKAGKTNPFA	142				flat	NA	NA								BWM						0		0	14	0	142	9.85915	0	9.85915		0.004		-28.18		47.6075	37.8728	18.8578	58.9732	83.6527	69.2459
4388	4450	WBGene00000964	dhp-2			C47E12.8	Q18677	Q18677	MSLLIKNGTIVNDDAIFKSDVLVLDGRIVEIAPSIQPTPGLEVVDATDRLVIPGGIDPHTHMQLPFMGEIAKDDFHRGTEAAVAGGTTMIIDFVIPTKGESLLVAYDRWRGWADPKVVCDYGLSMAITSWGPEIAKEMEIVTGAEYGINSFKFFLAYAGVFMVRDEEFYQGMIQCAKLRALARVHAENGSVIAERCEHLLSSGITGPEGHTQSRPEELEAEATFRACTMASQANCPLYVVHVMSKGAAAAIAHHRKKGAVVFGEPIAAGLATDGSHYYNEDWLHAARYVMSPPLSRDPSTPSALMKLLAAGELHLTATDNCTFDCQQKSLGKDDFTKIPNGVNGVEDRMSVVWDKGVHAGIIDPMRFVAVTSTMAAKIFNCYPQKGRIAVGSDADIVIW…	520				flat	NA	NA								BWM						0		1	43	38	520	0.961538	7.30769	8.26923		0.0057		-17.828		12.8568	58.2486	16.9934	7.13338	22.7684	11.1815
4426	4488	WBGene00001000	dim-1			C18A11.7	Q18066	Q18066	MASLAPFFKISDSILADESFDDLEINNHFKCTSKDLNEYPRTSTPLPGEITSIYSLPRSYNNQNLCTRSKPTTFISQNQQKGMTEKPKHSEYFLRLMKTRQEMQKKLTAKNGSNKSVQQYLRKLPPSTSKEVTIIPVKMKPDDNSVYISKELSDRTDTKLPKVSTKEVEKFGEQSDDEERHERSHIASDFNQKTPQSTHATSNHRKRIFIGRTGAKQQHVSKKATESELPYNIDVSTSNTTNATEALKLLKRPLLLPSKDPRSSKMPRLDLNQHQFRCKQYIVHSQFTCTQIEKTFKCRVGTSTESEDLDDYYFDAMPDGKAPHFPQQPVARQNDDGSLELECFVDANPTPQVKWYYDNKEVENSGRFSANLANKGSDSYSAILTIKELADADAGAYRC…	640				flat	NA	NA								BWM						2.96875		0	13	0	324	4.01235	0	4.01235		0.3873		-10.946		72.5915	86.3277	73.5053	17.5313	20.2506	34.9619
4648	4710	WBGene00001131	dys-1			F15D3.1	Q9TW65, V6CJD7, V6CIR0, V6CKJ6, V6CJE3, V6CLR8, V6CLV8, V6CLW7, V6CL65	Q9TW65	MLFSGASTAKPKKDEKKDKKSDRDPKNELQEWVFVRWANHLLGTERLTDYKSLQDGSNAIFVYQAIIGQTMAVLGNPSDDWPNVLQNIGDSKTNPQEVMEGQQKAVLSAWWQLVQFFWKNNAPVQLREEKLSEAIKQWCIEVMKSYEEIDVYDFTSSFRDGHAFNYLIHSYDRKLINLTKTAEMSAIDRIENAFAVAEKTWNVPRLLNPKDLHSDQLDSHSVLCYLMSLYLAMISTSKIETELEAQQIQQQKVAALLASHKMLSSQPSTSSSSALQIPPQTPPTAHHQAMLDRGKSFEQSAEGEVRSRKSSSSSQKSGKSKKARREEQLAEFKSCIEQVLTWLLEAEDELTTLTQMPRVELASVRSQFSDFESFMSSLTDSQDTVGRVLLRGQMLSNKS…	3674				flat	NA	NA								BWM						7.5406		7	820	656	3663	4.4772	17.9088	22.386		0.6179		-8.084		0.820437	99.5136	98.9806	0.260378	1.62614	0.147384
303	370	WBGene00001132	alp-1			T11B7.4	G5EFG1, G5EEF6, G5EEL1, G5EFL5, G5EC72	G5EFL5	MERVTVRMARSDRRTPWGFGVTEAPDGAVLIVNVIGGSLADRAGLRNGDVVDRLEDLDNLDINAVDRLLVTAHEKIELIVTRQPSGAATRIWRPEVTENTGPGQDQTPYRVNLQHSSDTRPPQGFNNSALPFETDQRVKHMQYNSPLGIYSDKSAAEQYVQQTQGLGDNSGARAAAQRQDEPAYLRSETLRLLKEQEHGSAGGAGTTLSNHPNPSGLPVCFMCTRPILGVMARAAGKNLHGDCLSCATCGNSLRNVGHHFIEDKFYCDIHGTQRKHGGRPGMDPNIFVKSSPTAAQPVHIQDSPRAAYHPQVNTARPVSVSPAPSAGSKTVTTHYHTPKTQGILSPGQRGVPTAAFGADLSKSVTYGGGVGPGGTHYDSNRLSPAPSQYSTQSRNQSQQ…	425				flat	NA	NA								BWM						11.2941		3	1135	1133	1424	0.140449	79.5646	79.7051		0.9399		12.197		85.6571	83.0975	52.4048	94.198	85.6915	54.6966
8330	8391	WBGene00001572	gei-15			M03A8.4	G4SI07	G4SI07	MSEYGSAANLSNFRERTGSPSYASLGKHRDDYNRFETARHAMNSRANRSQTSQEKEEIRFGGFGDRAGSGVELTGFNWSGGEVINSPQQLPKAIKPRTMFYSPIGDGTVAADGYELKRRPMDLSPKVTVTQLQHIERGAKGHDGVNIIEKNWSTGGSVPASEAGFGSEYGPGSGRNSRAGGGAFSPEPLPKPANTNGRPAPAPPANDFGNYQPKSDPFPATTRPASGLGGDGGNPFGGSQSNLGPKDGRNSVASSVFSDPSYRLDTKTGYLITNPRELIHQFATMTPVATIDDSVNNTPATHITQKQSYYKRTEETTEEQFAPHAPYKANHPVASPNKFVRQLRDDNLTHSQREANTHTEPVYQRDPNYNQRFQEIRTKSTSYSRGGDDIDQLTQQLVS…	409				flat	NA	NA								BWM						6.35697		2	233	137	409	23.4719	33.4963	56.9682		0.994		4.579		89.3048	82.8666	54.8293	96.114	96.2417	64.2938
8665	8724	WBGene00001794	gta-1			K04D7.3	Q21217, N1NVC4	Q21217	MLPRLAKSSLIQQVRGVSAIANAEPSGPSISTSIPGPKSKALKQEMDKVHQTTSVRFHVDYEKSFGNYVVDADGNALLDVYTQISSLPLGYNHPDLVKVASQPHLITSLVSRPALGSFPRTDFADGISHALTSIAPKGLKAVQTMLCGTSANENAIKTAFIWYQAQRRGGLGPDALHLESCMNQQKPGTPNLSVMGFEGAFHGRSLCMLSVTRSKPIHKVDIPAFDWPIAKFPRYKYPLDQNVAYNKKQDQECLADVEAKISEWKRRDNDVAAIIVEPIQAEGGDHYGSPAFFQGLRDITSKHGIVFIVDEVQTGGGATGDIWAHDHWNLSSPPDMVTFSKKLLTGGYFYGEHLRVKEAYRIYNTWMGDPTKLLLLEKAVEVIKRDGLIEQSREVGAEF…	483				flat	NA	NA								BWM						7.24638		0	22	0	483	4.55487	0	4.55487		0.025		-13.359		47.3692	59.1697	46.7207	52.9452	73.6699	29.8674
8982	9041	WBGene00001948	hlh-1			B0304.1	P22980	P22980	MNTETSTQSAPSDTYDTSIYYNSSPRVTANDITTLTSFAAPAPQVLDYANTQYDIYRNQPAYYLPSYAPTAPTTFYSDFANFNVTRSQDFASVPAVANSSDVKPIIIKQEKSTPNATELIIQSRVDSQHEDTTTSTAGGAGVGGPRRTKLDRRKAATMRERRRLRKVNEAFEVVKQRTCPNPNQRLPKVEILRSAIDYINNLERMLQQAGKMTKIMEQNQHLQMTQQINGAPPHDYVTSSHFASSSYNPENMFDDDDLTDSDDDRDHHKLGNAVDLRRRNSLDRLSRIVASIPNEEAMTDEQLLQPANDVIDGEKKLEML	320				flat	NA	NA								BWM						17.9012		2	266	266	324	0	82.0988	82.0988		0.0947		-1.154		57.0474	85.8094	38.3616	54.1341	41.8718	50.8892
9140	9199	WBGene00002040	hum-7			F56A6.2	H2L082, F0IWT2	F0IWT2	MSFDSISAGATGCFPRRAHTINATDDAHTHTVAVYMHSFNPDCENDTVHLEVHKRCTTEELIEKVLAGRAELEGQSVQDFDLFEMMGTPDGQTYKERRLDPGEYPVAVQAIWSRLPVVVDSATPKNRFVFRHRGYRAATGGTRFGSAEVASSIDAFLTKFLVQPQDREYADLCNLPELTEQTLLDNLRERFANGHIYTYIGPILVAVNPFCFFPIYNPKYARLYFQSKRLGSLPPHIFAIADVCYHNMLRIKENQCVVISGESGSGKTESTNHLMSHLISLSQKGSTGCSTEQTLLSAGPVLEAFGNAVTLTNNNSSRFGKFIKINYRENGMVSGANVEIYLLEKSRIIFQTKGERNYHVFYYLLEGADEEERKKYFLLKPHDYKYLNQNEPFALEGVN…	1880				flat	NA	NA								BWM						2.34043		3	521	440	1880	4.30851	23.4043	27.7128		0.2021		-13.676		4.63768	90.2727	83.8541	2.12233	1.3805	1.77352
9207	9266	WBGene00002069	ikb-1			C04F12.3	G5EFS1	G5EFS1	MSKADENDANLTENGVHKSRSDSEINSHTSSIHKSSSQHRRLFIDDISTIEASAGDRVWATCSGAGDATELITIHFLGDQFEESAIDVVRKHSLVMFTVPSLKVDSELEVELRFSTSNDNVTTISFKYLPRKIQRSHTQEISLFDNLLEFATNGDTISLLQPFVAQISKQDIEGNTVFHVAAKNGQSFSLKLLLSVIPPDIKNEVINVQNTHGLTALHVAIRTGDPDAVHYLMNHGAKIDISDNHGSTALHYLGDAYNESIFKEILEPSRGQRFDVNQLNSEGFAPIHVAVRRLKLSLIEMLIEAGALIDFLDTEKKRNALMHAIEMNDFETIQLLVERGSGTNIEDESGETALSLAVKNVNYPVIGLLLDNGADPNRQNSKGICLADSEDSVIQNIIN…	597				flat	NA	NA								BWM						4.52261		1	104	52	597	8.71022	8.71022	17.4204		0.9063		-18.493		29.973	70.2555	61.1177	55.2788	10.5895	16.0648
9288	9347	WBGene00002140	inx-18			C18H7.2	Q8MXG8, H2KYH7	H2KYH7	MVGGFRIGMHFLASALRFLEPRVDDDFVDRLHYLYTSTMVLMFAVLVSAKQYVGHPIECFVPAQFTRAMEQYTENYCWVQNTYWVPFQDLIPHRLDDRERRQIGYYQWVPFVLAVAALTFHIPSSVWRMLAGQSGLNAGLVLQLVCGDENVDPVVRDKTVDIVARHIDDALMYQRDHGARRHSVYIFAIFKLGKFYGAYVSSVYIFIKALHLANVILQFMLLNSFLQTSDYPMFGAHVLYDLFMGREWRDSGKFPRVTLCDFEIRVLGNVHRHTVQCVLVINMLTEKIFIFLWLWLTVLAIVTALNLIFWFIALVSNSCREHFVSKHLDIQSDQISRFVHRFLRADGVFLLQMIASHSGNLMAAKVTEQLWMIFVRRSGKPVIEDKIEDRGSVRSTNGN…	436				flat	NA	NA								BWM						2.75229		1	62	58	436	0.917431	13.3028	14.2202		0.0281		-19.695		7.59027	9.41538	3.10243	27.777	9.74699	31.3731
10149	10207	WBGene00002881	let-756			C05D11.4	Q11184	Q11184	MAVPAASSIVSYGGAATSNFLTTPVTPFLAGFYNSNFVTDRINSCAPYRVDRIRKQLQDEEENGYPPADDRRRGALFCRSGTWLEMLPIENPDDGSTRVKVHGTKEESSKFSIVEFVSVAMSLVSIRGVETKNFICMDPSGKLYATPSSNYSTECVFLEEMMENYYNLYASCAYGDRFNPWYIELRRSGKPRRGPNSKKRRKASHFLVVHHDLDRLRSPVPNGNDVTDLVVASLFHQPPSHPLFRQQTVTKPPNPHRISNLRAKVEMTNQAEKQRLLEEKKRRREKKKRRREDRLRKEEQIREARRQELKSLREEELRRRYQQQQQQQASTQTRYNRPQNPANPYPTYRPLPTRSTVQSPRPAYNPYWQSPVTQAPHHNSHHHHHHHPRVSSSSDPQQR…	425				flat	NA	NA								BWM						16.4706		2	289	278	425	2.58824	65.4118	68		0.9733		17.556		79.9042	78.9167	70.4569	60.1793	24.1268	76.8558
10159	10217	WBGene00002978	lev-11			Y105E8B.1	Q22866, Q27249, A0A0K3ATS1, A0A0K3AUC0, A0A0K3AQT4, A0A0K3AQS9, A0A0K3AWP0, K8FDX2, A0A0K3AUC2, K8ESC3, A0A0K3ARB5, K8ERM4, A0A1Q2U2F4, A0A0K3ATR6, A0A0K3ARC0	Q22866	MDAIKKKMQAMKIEKDNALDRADAAEEKVRQITEKLERVEEELRDTQKKMTQTGDDLDKAQEDLSAATSKLEEKEKTVQEAEAEVASLNRRMTLLEEELERAEERLKIATEKLEEATHNVDESERVRKVMENRSLQDEERANTVEAQLKEAQLLAEEADRKYDEVARKLAMVEADLERAEERAEAGENKIVELEEELRVVGNNLKSLEVSEEKALQREDSYEEQIRTVSSRLKEAETRAEFAERSVQKLQKEVDRLEDELVHEKERYKTISEELDSTFQELSGY	284				flat	NA	NA			1.91493	1.71308	0.0185456	0.0117782		BWM						21.875		0	19	0	284	6.69014	0	6.69014		0.3314		-43.969		55.3697	73.434	57.0056	61.3854	95.2346	33.8909
10872	10930	WBGene00003369	mlc-1			C36E6.3	P19625	P19625	MSKAAKKKSSKKRSGSEAAQFDQKTIQEFKEAFGIMDQNKDGIIDKSDLKDLYASMGQIAPDSQIDAMIKEASGPINFTVFLTLFGERLTGTDPEATIIGAFAMFDKKDCGKIKEDDLIKILQNKRGEPLDEDEVKAMYKGKPPIEGGEVDYKAFAHLITTGAQDELASA	170				flat	NA	NA								BWM						10.5882		0	26	0	170	15.2941	0	15.2941		0.0388		-25.144		55.8143	55.7062	29.2606	40.6141	73.6699	74.4338
10873	10931	WBGene00003370	mlc-2			C36E6.5	P19626	P19626	MSKAAKKKSSKKRSGSEAAQFDQKTIQEFKEAFGIMDQNKDGIIDKSDLKDLYASMGQIAPDSQIDAMIKEASGPINFTVFLTLFGERLTGTDPEATIVGAFAMFDKKDCGKIKEDDLIKILQNKRGEPLDEDEVKAMYKGKPPIEGGEVDYKAFAHLITTGAQDELASA	170				flat	NA	NA								BWM						10.5882		0	26	0	170	15.2941	0	15.2941		0.0452		-25.144		57.2709	57.3888	30.2456	41.4616	73.6699	75.2665
10874	10932	WBGene00003371	mlc-3			F09F7.2	P53014, G8JY79	P53014	MAPPSQDVLKEIFNLYDEELDGKIDGTQVGDVARAAGLKPTQAMVTKAAGQEFKRKGEKRLTFEEWLPMYEQLAKEKEQGTYADFYEGLKVFDKEETGKILAAELRHILLALGERLSADEADELLKGVEDGEGMVKYEDFIKKVLAGPFPDQD	153				flat	NA	NA								BWM						0		0	8	0	153	5.22876	0	5.22876		0.0025		-32.833		44.5075	48.9266	32.0757	55.2788	85.6915	73.5986
11111	11161	WBGene00003495	mup-2			T22E5.5	Q27371	Q27371	MSDEEEVYSDEEVEEEEVEETEEAPAEAEEPEETTEEVVAPPEVKERRAPVQEEKPPAEMTEAEIAMLAAKKRHEEEEAAKLLDYEQRRVLEKEQIEQELRELKEKQEKRRAEREEDERQFAERRRQDDERRRKEEDERKAKADAEKIRKNEEKVRRQQMMAGAFNGRVEAGAGRNFTVASKGDQAAQFGNLAQAKGGKDVMSKEQMEDAKRNFLAAVCRVQDVSGLLPNDLKERIRGLHARIVKLEAEKYDLEKRRERQDYDMKELHERQRQAARNKALKKGLDPEEAASSVHPPKITTASKFDRQTDRRSYGDRRYLFENPEEEKQASLVRGTGRPPAEWGRKQNEELEQIRKNLEPPKYVEQVKVEGARAPVEPVPLFVPTDDFEPQQVTEDPNVG…	405				flat	NA	NA								BWM						29.1358		2	333	259	405	18.2716	63.9506	82.2222		0.3449		-10.15		77.2709	82.1076	73.7927	25.8069	90.6411	38.2633
11128	11178	WBGene00003515	myo-3			K12F2.1	P12844	P12844	MSGNPDAFENDPGFPFLGISREARAATAARPFDSKKNCWIPDPEDGFVAAEIQSTTGEQVTVVTVKGNQITVKKDQCQEMNPPKFDKTEDMANLTFLNEASVLGNLKDRYKDLMIYTYSGLFCVVINPYKRLPIYSESVIKHFMGKRRNEMPPHLFAVSDEAYRNMVQDKENQSMLITGESGAGKTENTKKVISYFAIVGATQAASGKEAKDGKKGGTLEEQIVQTNPVLEAFGNAKTVRNNNSSRFGKFIRTHFSGSGKLAGGDIEHYLLEKSRVVRQAPGERCYHIFYQIMSGNDPSLRGKLKLSNDITYYHFCSQAELTIEGMDDKEEMRLTQEAFDIMGFEDNETMDLYRSTAGIMHMGEMKFKQRPREEQAEPDGEEDALNAAAMLGIQAEEFL…	1969				flat	NA	NA								BWM						10.1574		1	150	46	1969	5.28187	2.33621	7.61808		0.7891		-13.188		6.29329	98.1872	91.0808	0.79096	61.1373	0.872022
11284	11333	WBGene00003597	nhl-1			F54G8.4	Q03601, A0A131MCD3	Q03601	MSSSPQNEAEAREKMRELMSRPPSSRPADFVNPLEKIEQLLTCPICLDRYKQPKLLPCQHTFCYPCLESCADTLHRNLKCPECRAEHNIPYDGVKAFQPNYTLTGFLEIHLQATPESAAEIEEYIHRYNLERCKICDEKADCEPCAHCDRKACKECRQTHMDMLKRDMSRLLNQVKRLANRITEASDNLSKGVDMMTMNCETTKAEIKEYFHRYQRDLKKKEDNFLMEVDTFQATETRNMSNLRDVLEIESSNMSEAVSRLDAAIKGECSIEDSELVRMKNTFTEGLEYLRNFQPDADELFNRKLRFSAGDDAAKLPAAITTSGELCVLVPQFSGRYLPLEQSYLPRPFRLPLESDSYRVKSDERASMRDREADRTSSRHSHRNPEPDESSIRYRRRQQ…	974				flat	NA	NA								BWM						3.59343		1	240	212	974	2.87474	21.7659	24.6407		0.3748		-9.492		88.143	91.184	86.8411	65.9224	20.8401	17.8507
11928	11972	WBGene00003860	oig-2			Y38F1A.9	Q9XWM1	Q9XWM1	MVLAPFFEKAPSLIIAPDGSVLFECICNANPQPTVKWFLKDKELTGDRYVSKIKKMVGKFTVTLHIKNPTQEDQGVYKVTATNTHGSHSVEQQYIYKCTGKEVFKTLD	108				flat	NA	NA								BWM						0		0	12	0	108	11.1111	0	11.1111		0.0027		-27.002		42.6087	20.1204	9.35888	55.2788	65.2837	79.8772
12037	12081	WBGene00003932	pat-6			T21D12.4	O16785	O16785	MSTLGRSKTPSRDEPKKPGVFEKLSGTLSRKKKAPEDEHGNQGGAHHATDEDEVLELELEGREALDQSLVPVLARNIWLEEGEIRRYLTKETARDQKLAQVVDLLIYWLNEELADQRIVVRHLQEDLFDGQIIQKLLEKLEQIRIEVPEVSQSEEGQRQKLQIVVQTANRILGQPREQEKWSADLIHQKDFTAIIQLLVLLALHYRAPVRFPDNVVANVVVAQKEHGQVKTHRITEQITTVQTELAPKGTRDAFDTLFDYGPDKLAHVKTSLLAFCNKHLNKINLEVSDLDNQFQDGVFLVLLVGLLEGYFVPLYHFNLQVQSHEEKVKNVQFAFKLMEDTGLEKPRSRVQDIANGDVKSTLRLLHLLFTKYKHI	375				flat	NA	NA								BWM						8		1	65	65	375	0	17.3333	17.3333		0.009		-25.936		28.9683	47.9833	45.3476	30.0295	32.8764	49.6684
12032	12076	WBGene00003934	pat-10			F54C1.7	G5EF37	G5EF37	MAEDIEEILAEIDGSQIEEYQKFFDAFDRGKQGYIMATQIGQIMHGMEQDFDEKTLRKLIRKFDADGSGKLEFDEFCALVYTVANTVDKETLEKELREAFRLFDKEGNGYISRPTLKALLKEIADDLTDQQLEEAVDEIDEDGSGKIEFEEFWELMAGESD	161				flat	NA	NA								BWM						7.45342		0	7	0	161	4.34783	0	4.34783		0.0155		-29.147		34.9005	44.6156	16.0919	46.2073	65.2837	66.7281
12135	12179	WBGene00003991	pfn-3			K03E6.6	Q21193	Q21193	MSWSDIINNNLIGSGNVSKAAILGFDGAVWAKSDNFNISVEEAVAAGKAFTSLDALLGTGLRLEGQKFLVLNADNDRIIGKQGGSGFFIYKTIQAVIISIYEKGLQPEMCSKTTGALADYFRSIKY	126				flat	NA	NA								BWM						0		0	0	0	126	0	0	0		0.0062		-24.248		34.1464	24.4461	6.0452	57.7598	82.6333	58.9929
12153	57	WBGene00003998	pgp-4			F42E11.1	Q20331, D3KFS6	Q20331	MPEATDALLEPVVPMKIASEHVELGSRPDKKKKKSRSSQGNSLSNLFRHSGCADYLLLLGGLVLSAANGALLPFNSLIFEGITNVLMKGEAQWQNGTFDYDTFSSGIQHYCLLYFLLGVLMFTCTYFSNACLFTMAERRLYCIRKHLLQSVLRQDAKWFDENTVGGLTQKMSSGIEKIKDGIGDKIGVLVSGIATFISGVALGFYMCWQLTLVMLVTVPLQLGSMYLSAKHLNRATKNEMSAYSSAGGMANEVIAGIRTVIAFNAQPFEIERYGAQLAKARKMGIRKAIVLALCSAMPLFLMFVLMAGAFWYGAILTSYGVATSGTTFGVFWAVILGTRRLGEAAPHMGAITGARLAVNDIFKVIDHEPEINCTKQEGRRPDKVNGKLVFDNIQFTYPT…	1280				flat	NA	NA								BWM						4.66035		1	95	66	1266	2.29068	5.21327	7.50395		0.5176		-11.848		0.879391	14.5173	5.25424	1.8251	9.74699	1.22329
12320	12350	WBGene00004112	pqn-22			C46G7.4	V6CLP8, V6CLV6, V6CLU8, V6CLW0, V6CKI4, V6CLT8, V6CLQ8, V6CLU3, H2KZA3, V6CLV2, V6CLV0, V6CJC7, V6CLQ4, Q9TY23, V6CKJ1, V6CJD2, H2KZA4, V6CLR2, V6CKH6, V6CJC4	H2KZA3	MTEVCGVNVPPAIAPLFSLPQSSIDDIQNTSLNSIRSSHPFSYTKPTPGGPKLHNRIKCPRVVPRSFWLSFEEDEELDVPLLEPEMPQTVHLQYNSPMGLYSKEAAVEQFQQQIGETPNDLPAQEKHFDPSKSATLKYLKEGERENFGENFFEKVAQAEAPRVPYQSEPNWARTAREKSERARSKTPADPHTAYRPASSPAPANHPVHAENAREHAEKSKVFTHNINEPFGRSYWEASNTVPRYGRSHSVGRELYNRGYELGGMDYTGGIHVDHGTDYQYYEEPARKPQTPKLPPGYELGGTDFYKGHVPGDANYRGHGPDPPRLRPKYTADSHDPCNVAIAPNLEGVDANLLVGDTLSNQKIRHEVRHIDQTKFGTSFGPTKGFSYDHHTVPRYVEPP…	1165				flat	NA	NA								BWM						21.9742		1	925	925	925	0	100	100		0.9456		33.193		98.0152	98.3395	93.3677	97.1555	96.1091	53.4463
9996	10055	WBGene00004130	ketn-1			F54E2.3	H2L075, V6CJB8, A0A0M9JJ85, V6CLU5, A0A0M7RDU5, Q5PY59, V6CLT3, Q9NL87, Q8MXD8, V6CLP5, V6CLU0, V6CKH1	V6CLP5	MPVFRQQQPTQVTNGGIKAANGSAKTANGSANGSANGSAVHAANGGPSSQQARGHEHGAALVNARPPQFLVHPQSVAAKAFETVTFSAKVVGTPTPSLTWQKSDGTVIQSGGKYKIENGPDGSGRLIIEKVDAHDADMYMLVARNDGGSFQSRFSLNVLQAKSPEAPEFTGKFQSTTLYDGDSVKLYCKAAGEGVSFKWFKDNEPISSGGSYAVDNKGNETTLHINNATMKEGGWYRCDATNKHGTTTLKGRVVVNSRQKFNGPAHREMITLRKVDKVERSRTPVNQLQDVSASKSSPKFEGSLQSQQLVEGQSARLEIKYTPVEDPNLRIAWLLNGKGILASSRIVTFTDFGIAALEINPVNVFDQGEYTVVAVNPLGEARVSANIAVIGHGSFIQQQ…	4250				flat	NA	NA								BWM						3.29412		3	323	135	4889	3.84537	2.7613	6.60667		0.4888		8.602		13.2081	99.3122	97.6861	0.292311	0.329157	0.265291
12343	12372	WBGene00004145	pqn-62			T03G11.1	A0A0K3ATD0, A0A0K3AWF5, A0A0K3AVN9, A0A0K3AYL9	A0A0K3ATD0						flat	NA	NA								BWM						17.8396		1	1222	1222	1222	0	100	100
13135	13162	WBGene00004393	rnt-1			B0414.2	G5EFQ5	G5EFQ5	MTNVFHHVRNFIEQQPAPAKTLEKSSSPNILYTALPKHWRSNKSFQEPFYVVLLTPVPDNTEVSIWAGNDEKPCEEVRNEKAKVHRQVAKFNDLRFVGRSGRGRKFHLTIVIHSAPMMVATVKNVIKVTVDGPRDARIPKPQGSLKRQAEQQTIFPNDIIRTPGPPMPMTMIPPPWFPLPMTQTFPPSFFPLISPGPHPSISAALWKIHSESMKTPIKQKVEQENVSLNTSTCLSSPSIFITPTSDDRKLKRPSSPRSITKSSETSINLIQETPESVESKRRRNVSITSSNSSSPTIWRPF	301				flat	NA	NA								BWM						12.9568		1	164	164	301	0	54.485	54.485		0.6004		-8.54		70.0909	55.7062	48.6883	73.4169	13.9204	79.8772
13540	13567	WBGene00004790	sgn-1			F07H5.2	Q19185	Q19185	MRGYPVYAMGPTDEPVWSRNEQSLSRGVSHQTMVQPISSAYPTSYSHSQAYPSQTTVIHSTTKPVADADIYRVGIYGWRKRFLYTFILILAIGIVLNLSLTFWIMSVLDFSPDGIGTLKIEDDGIRVEGRAQFDRPVHFSQLSTLDEETLTVDSFRGVNLQARKPNGDVASKFSLMPEGKAQMTCDRFEVFDEDQKLLFFADSDEIGLKLENLRILEDGGSVFEGAIQTSSVRPQPDSPLRLESPTRSVSVDAAQDIEILAAAGEVSVNSLLDISISSKQGEIRLESSSIYMEKLARSDGRGSPQTQVCVCHNGRLFLAAPNADCRADRDICSN	334				flat	NA	NA								BWM						0		1	68	67	334	0.299401	20.0599	20.3593		0.0063		-4.799		43.1638	59.1697	48.0496	48.3026	40.7369	39.9067
13676	13703	WBGene00004910	snf-11			T03F7.1	G5EF43	G5EF43	MVEATSVAEREQWSSWADFIMSCIGYAIGLGNVWRFPYLCYQNGGGAFLIPYCISLVFCGAPLFILETSWGQLMSVGGLGMFKICPIFKGVGIAAAVMAFWLNIYYIVVLSWAATYLYNSFTMSDVPWKNCDHAWNTPNCRSEYVKIPCDSNRTIAEFFNVKVLTHDHIHEYKKQFFVGEKMNWTVCSAADLSVVSPVKEFWNHRVLGISSGLENPGGIRWDLALFLLLVWIICYLCIFKGVKWTGKVVYITASFPYMMLFCLLIRGLTLEGAGVGLEFYLKPDFSKLLESKVWVDAVTQVFFSYGLGLGALVALGSYNKFNNNVYKQALTVCFVNSGTSVFAGFVIFSFIGFMATQQEKSVAEVAQAGPGLLFLAYPSGILQLPYTQFWSCLFFLMVL…	610				flat	NA	NA								BWM						1.80328		0	31	0	610	5.08197	0	5.08197		0.0531		-9.652		1.95529	0.471629	0.024564	6.04028	37.6345	12.1322
14514	14538	WBGene00005644	srp-3			Y32G9A.4	G5ECY2	G5ECY2	MFDVAERRFALNFLNTLPVHNESLVFSPLSIALVLSLVHTGVRGSSRDQIRNTLLSGATDEQLVEHFSFVSKEVKNGTKGVEVYLANKVYLKKGFTVNPTFLSTALKNYGADAKSLDLTTPAAVQEINSFVNTATNGKIKNIATQDSIKDAIALLINSIYFKADWDDKFDGMSVSEQDFTLHTGEKKKIKFMKEFMNDRSFSSDDVFDVLHVAYSDQRYQFSVFLPKLRNSLKEALKKLNEKRFNDLLKTKKRTFMNTQLPKFTIEKDLNLKSHLQTLGITDIFSDSADLSGLAENLKISEGVHKAIIEVNEEGTTAAAVTMMKAVPMSARMEQPVNFIADHPFFFTITFLNHPIFVGVFNG	362				flat	NA	NA								BWM						9.39227		0	2	0	362	0.552486	0	0.552486		0.0053		-19.388		21.0784	46.9909	4.07517	27.0572	46.2786	43.5077
15258	15279	WBGene00006308	sul-1			K09C4.8	Q21376	Q21376	MISNLRISNYFIIFYVLFLIIPIKVTSIHFVDSQHNVILILTDDQDIELGSMDFMPKTSQIMKERGTEFTSGYVTTPICCPSRSTILTGLYVHNHHVHTNNQNCTGVEWRKVHEKKSIGVYLQEAGYRTAYLGKYLNEYDGSYIPPGWDEWHAIVKNSKFYNYTMNSNGEREKFGSEYEKDYFTDLVTNRSLKFIDKHIKIRAWQPFALIISYPAPHGPEDPAPQFAHMFENEISHRTGSWNFAPNPDKQWLLQRTGKMNDVHISFTDLLHRRRLQTLQSVDEGIERLFNLLRELNQLWNTYAIYTSDHGYHLGQFGLLKGKNMPYEFDIRVPFFMRGPGIPRNVTFNEIVTNVDIAPTMLHIAGVPKPARMNGRSLLELVALKKKKKKHMTALKPWRD…	709				flat	NA	NA								BWM						6.34697		1	153	95	709	8.18054	13.3992	21.5797		0.0612		-16.185		33.7583	46.9909	27.2144	21.4665	12.7806	91.0931
16470	16488	WBGene00006408	tag-18			T14G12.3	Q22508	Q22508	MPSDVAFRARHPGCLPRSRSLERFGNVGTLTRVTSYPNLSTVRVGPNYSSTLHKYRRDYDTLDDSNIDRYTFYTPFYWQTYRFAARRQLYVDPIPHSLGHEYAPFWSRYKWYTDWLNPTYWRRYRDPNYDRPLWNSWRPWQYDTKNVKTAIDLYRNGCIDFKTLDKKWIEPTALGRRGKDWSDVYLPAARYGAHRYFYSFS	201				flat	NA	NA								BWM						0		0	14	0	201	6.96517	0	6.96517		0.0752		-15.572		33.5937	44.6156	4.28887	83.3579	41.8718	88.9364
16813	16824	WBGene00006436	ttn-1			W06H8.8	G4SLH0, A0A2I2LDW1, A0A2I2LDV7, A0A2I2LDV8, A0A2I2LG61, A0A2I2LDV4, A0A2I2LG13, A0A2I2LDX0	G4SLH0	MEGNEKKGGGLPPTQQRHLNIDTTVGGSISQPVSPSMSYSTDRETVMRSASGHATVAETHLIRSIGSQSQSYTEEHWSSEITSFVALAPPKFIQVIKAYRVHSTDTISLVVEVASDPPAIFEWFYNEKSVLQDRDRFQVGHGINISRLKVSRPEQGVYKCVTRNPAGVSTSYGYITVNADREHLSSSKEDMRLQRQHSVTYHQAPRFLTQVPNLFVTAGSNVIIDVEVDANPPARFSWFVNGKEYRDSIHGVEMFSPDVNRSVVRFSIPVAGEYKVVASNVHGSAMSCGHVDIQKVIELEESTLTTSTTAFDPMTTSMRALGNNGRNSRQAVNMFELNYTQRSSSVPRGVRHLESHIEVSNMTGEEKKTQQQTRTDAASIVESRFHPQPPKPPRAGTSR…	15160				flat	NA	NA								BWM						19.9802		4	699	632	3215	2.08398	19.6579	21.7418		0.9807		-8.664		99.9509	99.9951	99.9902	0.0049128	0.0442152	0.0098256
3850	3912	WBGene00006495	cpna-1			F31D5.3	H2KYS8	H2KYS8	MVFDARLGYDPDEWEECPEPEHFLVFSGFTRYMLTFAAIAFVYYFFKLLDDKNKKESGEKEEPQTSVESVLAKAGDKLHDVKEQVQQHIPESAEELMREADQYLKEQAHSVQNNVHQFAEQAANKFPSLEVDLNLGHPIDATREKFDTVLSSVNNHLHETKNMDLSPTSRDSTQFEQIPSIAPEESAFGHDFEHVPPHLKTAAEQYYAQQHQPPPVPQHKIVQPVPISPTDQQLLHEFDIYDAPAHQRMNQISEQLGQLGQKTPAQLQQLQHAQLAHQQLQQQGVFQPIQQPSPLQIQTHPQQPYFDFSQLSPASQARYNQQQFVDISQLSPGAGALIAEQQASGAFQPVTKKLGREKRLSEQDERALQDWEKEKALLEADRLKKLLDHEVGGDSTDLD…	1091				flat	NA	NA								BWM						12.5573		1	783	760	1091	2.10816	69.6609	71.769		0.9239		18.18		84.0604	95.2321	87.772	15.0454	19.6414	13.0656
16663	16675	WBGene00006582	tmd-2			C08D8.2	Q8I7M7, H2KYK4	Q8I7M7	MEEELQQLRTNASSDLMTDEDFIATIESMGVEAQEREINDLLKAMHENRIVSWDEAERILMETDQTPIKCSLPEQTRPTEPENEVDVDQCIKKLLDNDPSLKEINLNNMKRTPVPAIKRLLEALAYNEHCERISLANMGLYDHDINVLVTVIEMNQAIKKVNLETNYLSGDFFSKLFKAALVNESVEEIKAVNQGVSFSTQSEKEIIDAIVKNHGLTKISINFRLPEGRHKVENATLRNGELKRVKRREAAQKARLEAEELAKNPVPKLAPEPKKEPEPKKMAPKFGEEKQAPMPVYKLNRTLSRDVQ	308				flat	NA	NA								BWM						6.16883		1	118	69	308	15.9091	22.4026	38.3117		0.0382		-28.158		45.0479	68.6711	34.7237	37.9735	51.0366	56.1066
16670	16682	WBGene00006584	tni-1			F42E11.4	Q20334	Q20334	MSQIDENIRYGGAANETDGEDAQRKAQEREAKKAEVRKRLEEAGQKKQKKGFLTPERKKKLRKLLMNKAAEDLKTQQLRKEQERVKVLAERTVALPNVDSIDDHAKLEAIYNDLFSRLCNLEEEKYDINHITTETETTINQLNIEVNDLRGKFVKPSLKKVSKYDNKFKKMAEAKKEDGSKNLRNNLKTVKKESVFTQIANKKKSDKPEWSKKKEEKKEESAPEPVIEPVEEEETAASEGEEEEEEADEE	250				flat	NA	NA								BWM						26.8		2	155	151	250	1.6	60.4	62		0.5691		-34.671		74.93	68.0938	58.6269	40.6141	90.0909	74.4338
16671	16683	WBGene00006585	tni-3			T20B3.2	Q9XUN9	Q9XUN9	MLIEDENIRYGGAQADVEDDAARKAQERELKKAEVRKRMEEAAKKGSKKKGFLTPERKKKLRKLLMMKAAEDLKQQQMLKEQERQKTLQQRTIPLPDVDSINDQGQLLKIYEDMFARVCALEEEKFDINFGVSQTEAEINQLTIQVNDLRGKFVKPTLKKVSKYDNKFKSSGEVKEKSNFRNNLKVVKKETDLDEIMAKKKGTADGKPEWSKKEKKEEEAAPVELAAPVEPEAEPEPEAAEPAAEEPEAEEEEEEEEEEE	260				flat	NA	NA								BWM						26.1538		2	188	166	260	8.46154	63.8462	72.3077		0.5898		-27.745		76.3719	73.434	67.9686	33.1344	92.4638	71.7612
16674	16686	WBGene00006587	tnt-2			F53A9.10	Q7Z072, Q7Z071	Q7Z072	MSDEEEVLSGEEEEEVEESLAEEVEEEEAAAEDAAAEEEEPEAAEEEAPVEEKPKPRPPVQEEKPPAEMTEAEAAMLAAKKRHEEEEAAKLLDYEQRRVLEKEQMEQELRELKEKQEKRRAEREEDERQFAERRRQDEERRRKDEEDRKAKADAEKARKNEEKSRRQQMMAGSFAGAAVGAPGGKNFTVSNKGDQAANFGNLAQGAKAEGLTKEQQEDAKRAFLNVVCKAQDVSTLMPNDLKERIKGIHARIVKLEGEKYDLEKRRERQEYDLKELNERQRQVARNKALKKGLDPEEAASSVHPPKITTASKFDRQTDRRSYGDRRYLFENPFVKPAYTLVHGTSRPPAEWGRKENEELEQIRKNLEPPKYVEQVKAEGDAAKPPVNPIPLQVPDKEFE…	428				flat	NA	NA								BWM						35.514		3	382	365	428	3.97196	85.2804	89.2523		0.5503		-7.686		84.6008	88.1945	72.8986	30.8057	96.959	36.5488
16675	16687	WBGene00006588	tnt-3			C14F5.3	B9WRS6, H2KYL8, H2KYL7, H2KYL9	H2KYL8	MSDEEEQYTDEEVEEVDEEEVEADYAPSETDTTRSDRPKTKSFTEDEEGLTEGERAMAAAKRRHEEEQHAKLQDYEERRRTEREKEEEELKKLKEKQEKRKLEREQEEKEMEERRRAADDRRRQEEEERKAKVDQDRRNREEEKNKKNQLSGFQTGGQGGRNFTVAKKAAQNDKFGNIVQAKQEMGMTKEQQEDAKRAFLAAIRKEIPNASEVPQSELKAKIKELHQRICKLETEKYDLEKRHERQEYDMKELNERQRQVTRNSALKKGIDPAEVGNTRYPPKQLIASKFERQRVQTFSDRRALFTNTKKLDTDAYFDWLNSFNYIAPQSLNIISARDDIHAYLNSPDRCPKYIEKEPTICTSQPVFTPRRLSIPAAFLKQG	382				flat	NA	NA			1.46278	1.2968	0.02097	0.0493436		BWM						23.2984		1	279	279	279	0	100	100		0.159		-12.291		70.42	80.307	70.0909	27.0572	68.1037	47.8482
16797	16809	WBGene00006634	tsp-8			F33C8.3	Q19983	Q19983	MGSCVNALRIVTFLFNFAFWLSGVVVFGLGIWLLFDPAASDFFALHSTHPGAFRYVGWFLVGAGAIIILVGYFGCIGAWKMNQCALAFFCCILILAFFLELAAAVTLFHKQEHIKHYVESSMYDTIRNRYSSETAFKDAFDTVQEKFECCGVKTYTDWLSARWDAEPSTQLEVNEEDAGRIEHGIGAFGGNKGTGYGRVPSSCCNEHGKLSYPNNCGRSFSQAPLNTYAQFINTRGCADAVYESVSSSLSLIVGVCVVLCIVQLLGIVLSMTLCCCKGNSKK	282				flat	NA	NA								BWM						18.0851		0	32	0	282	11.3475	0	11.3475		0.073		-6.97		16.7428	7.04741	4.28887	37.1064	90.0909	36.0206
16780	16792	WBGene00006637	tsp-11			B0563.2	Q17526	Q17526	MNFRNQSTMPLSCTARALKFSLFIFNLVFLLCGLICLGIGLWLVLDKYAIDNLAFATAKVQGYDQDAGLRDLATKPTAVRQFGYLLFVGGFIVIVVAFLGCCGAAKEWRPLLCCYSSCLMLILAIQIAATIYAFLHSHMFENDFRDILHSSLKMYNGTDNMKVSNNPQDGLLVKTAWDKIMIEKSCCGVDSKIGEFNNSGWYQLNHGRYQFPPACCPPDEHGRLRPYCNTIMRHSHGCYAKIAESFEEVTSHFKIVSWTVVLFALIQVVGIVVGFWLCDSITSEDEF	287				flat	NA	NA								BWM						12.1951		0	33	0	286	11.5385	0	11.5385		0.126		-16.923		13.6871	10.7713	4.73594	37.1064	41.8718	42.3753
16924	16935	WBGene00006663	twk-8			ZC410.4	Q7JM20, Q23297	Q23297	MPVLLRAVGFGRSSNTNRNLRPSSGASGDRLRRPSQMSAGAQSSATRHSQGDKDKVVQSRIHDQEPEVKEPETWGNRFHRMYKEYHIKYLFPLIFIMFYMLIGAIIFYLLESGTAEDAANEEDYKYKRERRLLLLRMEELVQDTASRRRAYRKKALEEAIDNYEQKLDFAVKNESQWTFMSAMYFAGTLFTTIGYGDIACITSAGRIATVIYSCVGIPFMLITLNDLGKFLYNNINGCVKGFEDFTTYLGAFRLCNRRGNGNFQKGDELVTLEAGTTGTTDAPEVSSLASELGSERNESDYEDIEDEEERSMPRMSVKVALGITVGWIFFCSALFKLWEDWSYGQSCYFMFISLSTIGLGDVSVQRRDMMVLCFVFVIVGLSLVSMTINVIQVALEDFY…	769				flat	NA	NA								BWM						7.28218		3	483	454	769	3.77113	59.0377	62.8088		0.7931		-7.331		37.1113	71.1938	70.0909	12.4048	24.1268	13.9204
16885	16896	WBGene00006667	twk-12			F29F11.4	Q19907	Q19907	MTLFKKIQWFCNLIRLRSYYKFLLLIAYTAFGAWLFRTYELQADIKRRSVFGNTTNLVRRQLAERWIEMHKDAVLRNDSALRFRRAAEAVEWLLDELNLSDHIRDLSEETPWTWTGAMFYAGQLYTTIGYGYPTTKTDEGRICTIFYALFGIPCFLMYLKSIGKTLSKKMKKYYKKLRRSRVGRILLPTRVTAMKDGFEDPEAAEERKKKPFPIPIAIIMLIIWICFSASMFCIWEDTWVFSSAVYFFIVSISTVGLGDMLFRTPDMMVFNFLLILVGLALLSMCFELITDRVAKWKQKRFDEHIKKVQKMAFQVFEKDPFIEEAPPLGIRMAPNLMQIAATHVSEEKRGFFAEFKDWFAGKVTDNVIQSKLEDSDDESDSEEALEEFDSPQIATVTAN…	684				flat	NA	NA								BWM						12.5731		2	446	429	684	2.48538	62.7193	65.2047		0.3649		-15.101		13.0312	58.2486	60.6387	15.8413	8.02506	21.8153
16890	16901	WBGene00006672	twk-18			C24A3.6	Q18120	Q18120	MAIVAQGVSTILTTFQKTFKGLLPLIILVAYTLLGAWIFWMIEGENEREMLIEQQKERDELIRRTVYKINQLQIKRQRRLMTAEEEYNRTAKVLTTFQETLGIVPADMDKDIHWTFLGSIFYCMTVYTTIGYGNIVPGTGWGRFATILYAFIGIPLTVLSLYCLGSLFAKGCKMLWRFFLKSTRVVSKDLSNKISEAADNIEEGTTAITPSAEKTENNDDDLLSFPISGLLLITVIWVIFCAVLFTFLEEWDFGTSLYFTLISFTTIGFGDILPSDYDFMPIVGVLLLIGLSLVSTVMTLIQQQIEALASGMKDNIDQEYARALNEAREDGEVDEHVDPEEDPENNKKSFDAVISRMNWSKRGLYYLLPDSQKKELAKQSEKKMGRKSIKIQTDNDLLE…	461				flat	NA	NA								BWM						6.50759		2	174	132	461	9.11063	28.6334	37.744		0.0109		-25.905		6.25154	7.5608	15.2395	15.8413	11.3707	24.2741
16896	16907	WBGene00006677	twk-24			F55C5.3	Q6BES3	Q6BES3	MNGTTKKDDKIVAGRSKSADSKWKDRMNRGLGNMSKSLPSFNKNAANAKSDKTSDTKVVIEDESKKKKKKKKKDKNLDVEELPQQEDPEVLAAKEKEKKAKVMIASRDARNKTMWRHIAWLVVLFSFSLFGGVIFSAIEGGYETTQLIKKFEHEKDVYERRKIYQEQLFQRLREIEHDNTNPRGRNSSREHFKLEQSRHALEWYEQKMGVTIEEPQMRETKWNLWGGVYYSASLYTTIGYGNFHPLTKSGRIISMMYACIGIPLVFTILLDWGFLYFTWIEYGWNRFNENFCQKSLQRDMQRRIRRERIRRVGSELSLSSTAPLLHRTTTQLSNPVQHIESNHPLSPLDVDVPMGEQVQTVPIKSAAIFFFLWIMISAFIVRLWEYEWTYFTAFYFFFT…	579				flat	NA	NA								BWM						12.6079		3	219	219	579	0	37.8238	37.8238		0.004		-18.984		11.3559	11.4542	36.6372	6.73299	9.46942	17.0597
16899	16910	WBGene00006680	twk-28			C52B9.6	Q22940	Q22940	MYTHNAVDTFDMGSADSSLSSLNEIPMEMDLTSAGPPISDDETEVETKEKKLFVYAKRILPHVGLVILLFLYLIAGAFLFRYLEAPKELETRNHELTTILGLRDEFQDHIWNITQDSDNRISREAFNAINQEYFEQLVKNMFQAYRNQFITAKHLLNKTREDEVLWTFPNSMFFAATVITTIGYGNLVPITVTGRVACIIFALLGIPLLLVTIADIGKFLSEFLSYLYRSYRGFKRKLRRQSKKITSQYRSQSQSRSSSVMGSSKAGSMNLHDIDSDSEDSAGDELRIPVFMVLLVLLAYTAIGGFLFQSWEHLEYFEAFYFCFITMATVGFGDIVPNEQVYVFFTMAYIIFGLSLATMCIDLAGTEYIRKIHYLGTKMEDAKGAVMTGLQAGEHLLKH…	523				flat	NA	NA								BWM						6.30975		2	97	94	523	0.573614	17.9732	18.5468		0.0063		-14.166		5.04544	7.38394	4.98649	11.2822	16.787	16.0648
16903	16914	WBGene00006683	twk-31			Y47D3B.5	Q9XX01, Q6EUT8	Q6EUT8	MPNPSPTPLQASPTTTLLADGYTDDALPSKYDNFRASRPYSRESLLSNTSLGSKVRFSQFSFQSRDDLTTIDDEEEEEYRKPAPPEPTKFLQVSRTTVRMLAGGFSRAGSLEGVETGGIVGPPMSPISFLGKCKHYYDKYKLDRISASVLLVLYSFLGAWVFYLFEHDYEREVKLKERIDLRMLRNDTFQRISSMVFRQQGLANFEEVFIDYEKKLHVVRLPECLDWDYWGALFYVGTLFTTIGYGNIYPRTALGRAASVVYAIVGIPLVLAILSKCGKWMTDSLSEKWQQHRIQITEKAKMTKNRLRGKKILKSGEIVEANTGAEADPEKKPEVESRTIPIWLALLICVVYVAGCSSLFLLWETRWTFFTSLYFFCISLLTIGLGDIVPDKPHMFIVM…	1088				flat	NA	NA								BWM						6.25		3	806	797	1136	0.792254	70.1585	70.9507		0.374		-13.06		57.2709	86.0354	89.4006	11.7932	5.38934	8.98059
16913	16924	WBGene00006692	twk-42			W06D12.2	O45891	O45891	MFWNLVAVNYERYHLHHLVKIGVLIVYSFLGAGLFVLCEAENEKSLKHEDNMRVLRTSIAAKQVFVQRLQNMYSGNGSSSEFSETKLRRVLSEYDAAMGISIDSKMKTRWDIWGGLYYAGTIYTTIGYGDLAAETIWGRICTMLYAMIGIPIVINILNDWGNMLFYFVDHFWQNIGRQWIQSLRQKLRRRKVQSLEEGSIDKTPLMETSSTPPSPQNPNGTRPIPLLLVLIVLFFWMIQCVAYFAYFENWTLFESVYFFFISMTTIGFGDFTPSHTVAVGGIVFILGGLSVVSMCINVIQMQLEFIFNQIVQRIENDFKNTLSVAAEESRKKSIGVSEFGSIDPSKKKTMRTDGNVAEKYSENMEMGNKLLMRFMSNHQKKMLNEKFDERAKMRNSGTQ…	444				flat	NA	NA								BWM						8.33333		2	141	140	444	0.225225	31.5315	31.7568		0.0235		-16.483		18.1552	11.8251	7.33972	31.5942	40.7369	29.8674
17093	17103	WBGene00006754	unc-15			F07A5.7	P10567	P10567	MSLYRSPSAALLKSPSQAAFGAPFGSMSVADLGSLTRLEDKIRLLQEDLESERELRNRVERERADLSVQVIALTDRLEDAEGTTDSQIESNRKREGELSKLRKLLEESQLESEDAMNVLRKKHQDSCLDYQDQIEQLQKKNAKIDRERQRVQHEVIELTATIDQLQKDKHTAEKAAERFEAQANELANKVEDLNKHVNDLAQQRQRLQAENNDLLKEVHDQKVQLDNLQHVKYTLAQQLEEARRRLEDAERERSQLQSQLHQVQLELDSVRTALDEESIARSDAEHKLNLANTEITQWKSKFDAEVALHHEEVEDLRKKMLQKQAEYEEQIEIMLQKISQLEKAKSRLQSEVEVLIVDLEKAQNTIALLERAREQLERQVGELKVRIDEITVELEAAQR…	872				flat	NA	NA								BWM						13.1881		2	87	75	872	1.37615	8.60092	9.97706		0.2918		-20.601		18.9683	95.4483	83.8541	3.52248	95.2346	2.77819
17098	17108	WBGene00006759	unc-22			ZK617.1	Q23551, H2FLH2, A0A061AE24, A0A061ACT3, H2FLH3	Q23551	MVGAPRFTQKPSIQQTPTGDLLMECHLEADPQPTIAWQHSGNLLEPSGRVVQTLTPLGGSLYKATLVIKEPNAGDGGAYKCTARNQLGESNANINLNFAGAGGDEAKSRGPSFVGKPRIIPKDGGALIVMECKVKSASTPVAKWMKDGVPLSMGGLYHAIFSDLGDQTYLCQLEIRGPSSSDAGQYRCNIRNDQGETNANLALNFEEPDPSERQERKRSTASPRPSSRGPGSRPSSPKKSMKSREGTPKRTLKPREGSPSKKLRSRTSTPVNEEVSQSESRRSSRTDKMEVDQVSGASKRKPDGLPPPGGDEKKLRAGSPSTRKSPSRKSASPTPSRKGSSAGGAASGTTGASASATSATSGGSASSDASRDKYTRPPIVLEASRSQTGRIGGSVVLEV…	6839				flat	NA	NA								BWM						4.51243		3	414	370	6839	0.643369	5.41015	6.05352		0.5926		-7.371		97.9096	99.9312	99.2238	0.0933432	0.024564	0.24564
17103	17113	WBGene00006764	unc-27			ZK721.2	Q9GYF1	Q9GYF1	MSEEAGEDAQRKAAEREAKKAEVRKRLEEAGNKKKAKKGFLTPERKKKLRKLLMVKAAEDLKRQQLLKEQERQKALADRTISLPNVDSIDDKGQLEKIYNDLWARLTQLEEEKYDINYVVSQTEAEINSLTIEVNDLRGKFVKPSLKKVSKYDNKFKKSGESKAGTKEDFRANLKIVKKDVMEAIVNVKKKDDKPDWSKKNKDAKAEDSAPAAVAPEAEPVAEEAEAEPEAEEEEGEEEEEE	242				flat	NA	NA								BWM						35.9504		2	170	156	242	5.78512	64.4628	70.2479		0.5816		-34.793		75.6767	78.9167	57.5633	41.4616	93.1589	68.4107
17130	17140	WBGene00006789	unc-54			F11C3.3	P02566	P02566	MEHEKDPGWQYLRRTREQVLEDQSKPYDSKKNVWIPDPEEGYLAGEITATKGDQVTIVTARGNEVTLKKELVQEMNPPKFEKTEDMSNLSFLNDASVLHNLRSRYAAMLIYTYSGLFCVVINPYKRLPIYTDSCARMFMGKRKTEMPPHLFAVSDEAYRNMLQDHENQSMLITGESGAGKTENTKKVICYFAAVGASQQEGGAEVDPNKKKVTLEDQIVQTNPVLEAFGNAKTVRNNNSSRFGKFIRIHFNKHGRLASCDIEHYLLEKSRVIRQAPGERCYHIFYQIYSDFRPELKKELLLDLPIKDYWFVAQAELIIDGIDDVEEFQLTDEAFDILNFSAVEKQDCYRLMSAHMHMGNMKFKQRPREEQAEPDGTDEAEKASNMYGIGCEEFLKALTK…	1963				flat	NA	NA								BWM						12.0734		1	116	49	1963	3.41314	2.49618	5.90932		0.6693		-17.835		15.1904	98.477	94.6254	0.76394	95.4409	1.01941
17141	17151	WBGene00006801	unc-68			K11C4.5	B7WN66, A0A2C9C3P6, A0A2C9C388, A0A2C9C3F1, A0A2C9C2X2, A0A2C9C354, Q94279, A0A2C9C3E8, A0A2C9C384, I2HAA6, A0A2C9C3G1, A0A2C9C390, A0A2C9C370, A0A2C9C3I4, I2HAA7, A0A2C9C325	A0A2C9C3E8	MADKEEQGGGEQDDVSFLRTGDIVCLSCVASHNRDGVLGSERVCLCTEGFGNRMCTLENVSDKDIPPDIAMCMLYIDNALSMRALQEMMSADSDHKSASGAGGHKTLLYGHAVQLKHVQSEMYLACLSSCSSNDKLAFDVGVQETNEGEACWWTIHPASKQRSEGEKVRVGDDVILVSVATERYLHMAYSKGYMVIASFHQTLWNIQSVSSGSMRTRNMGFLFGNDVLRLFHGNDECLTIPENWSEHPQHNMVIYEGGAAVTQARSLWRVELIRMKWHGALVGWEQVFRIKHITSGRYLGVLDNSVQLYHKEKADFDLTAFVMCQNKDPKKQMLDEKEEEGMGNATIRYGETNAFIQHVKTQLWLSYQTTEVTKKGLGKVEEKKAVALKDGHMDDCYTF…	5201				flat	NA	NA								BWM						3.74928		4	747	438	5202	5.94002	8.41984	14.3599		0.2642		-7.251		0.152297	98.4083	95.3943	0.098256	0.233358	0.191599
17159	17169	WBGene00006819	unc-87			F08B6.4	P37806	P37806	MLSFNNTTSASSFQSASSRYLMSSSSSIGPPQQQSAKLFPEHFYPSGLSPRQSEALERLRPNTASRERNIPIQFTGKNPTTNSALEEYKPVPHVQVTSPKSSIVPNFVSEQRGLQPQPTSQAPTNYRQFVAAPRSPRGYGDYPEMTGKASAAGDSEPVQIPIKTQTPITQARAQETKIPTIVSPHPVYYYDNQEQPIQQIREEQPNATMETKVTGQGQPKRVGRWTLAQLRQTDGIIPSQAGWNKGDSQKLMTNFGTPRNTNTRVKSENLQEIPEDIANRTHGEVRLQSGTNKYCSQRGMTGFGSGRDVCREGVRVAQNPADLAELPEEKIRMSEGIVRLQAGTNKYDSQKGMTGFGTGRRETTKMVDSKHPEYDHEKPDQSEIPLQSGTNKFASQKGM…	565				flat	NA	NA								BWM						6.72566		1	265	224	565	7.25664	39.646	46.9027		0.8617		0.742		93.5618	86.4947	80.5232	87.4159	79.0027	57.5903
17160	17170	WBGene00006820	unc-89			C09D1.1	O01761, A0A2C9C2V5, A0A2C9C3B7, A0A2C9C365, A0A2C9C2W9, A0A2C9C330, A0A2C9C2V3, A0A2C9C332, A0A2C9C2S8, A0A2C9C2G8	O01761	MASRRQKQFDRKYSSYRKFTATEDVNYSTHSSRSSYRSESLTSRTDGRGRSTSSEIIAGSESRSYPVYIAIQDYTPDKEDVEAIPLEQGQIVEVLDKKNSVRWLVRTKARPPRSGWVPGSYFETPTEFYKQRRRTREIENVSLSDEQAALVKRDQVYHELLRSEEEFVSSLRTCVDDYIKVLDDPEVPEAVKKNREELTLNIPELYNFHANVMLKGLNYYSDDPGKVGQTFVRLEKDFESHVEFYKQYADTLKLLEEPEIKRFFEGLSAKNDAGASSFVDHVKEIADRMVQYQNYFKEFVKYSARAHGSSKSIQKALELVTTIPQRVHDLEFTNNLKQHPGDTGKLGRIIRHDAFQVWEGDEPPKLRYVFLFRNKIMFTEQDASTSPPSYTHYSSIRLD…	6632				flat	NA	NA								BWM						9.76364		2	666	607	6632	0.889626	9.15259	10.0422		0.9387		-9.823		89.8379	99.8182	99.8231	0.0098256	0.0343896	0.0687792
17162	17172	WBGene00006822	unc-93			C46F11.1	Q93380	Q93380	MKFQKMGDSNTWDLVGEQQQRKKSRSPSRASRVDSELLVGVENAAELEALGLGKEQLEEEARRHKKQRSKSPALENIRKTSIHLLQKFGAIPKKKDDSVLLFRFHDIPDIPLESLCIRPKEFFEEPKVFSFRDMGREQQKAEVNEKCSYLFRGTSFDHDDHFELPTETGRVPEYDHFCPIHGSRRRLPRNKLVTMQTLMHSVDDEDNEDLAYIYGHDFLAKLVRKKKREMMSGTEKERANKIKRKIMSNLWILSVAFLFLFTAFNGLQNLQTSVNGDLGSDSLVALYLSLAISSLFVPSFMINRLGCKLTFLIAIFVYFLYIVINLRPTYSSMIPASIFCGIAASCIWGAKCAYITEMGIRYASLNFESQTTVIVRFFGYFFMIVHCGQVVGNMVSSYI…	705				flat	NA	NA								BWM						3.85714		2	179	135	705	6.24113	19.1489	25.3901		0.0897		-14.935		3.50037	4.64505	11.6581	9.72488	10.8425	13.3726
17164	17174	WBGene00006824	unc-95			Y105E8A.6	Q9NEZ5	Q9NEZ5	MTISPQPSHQQFESYQWTTESRSSQQRHGTGTPSQDGRLSAIPDPVERHVARWRSESRNSNKDKVFRNDEEFSQQDEIVNGTLTALKNDVEQTTEIIRRKQEQMRMERRQFQTEMEVNGRISIDPTDDWLAARLKAVSSDDMNQQLVKLKQDQRQNAVTDTLAALVYDVNATTEVLRRGQRGRDGEDGNKKKKEEIEYTLRLTPAPEEQIPQRPKIPEDDNMETDDYSRQYGVQMSEETDSLRRRRARSTTPRRTLHISGSPPPPAAAVCAYCSEEIDGAILTALAPNSERAQKFHTYHFMCTYCQKALNMHGTYREHDLKPYCHDCFYKLYNGLQYAPDDHQASIEKLI	350				flat	NA	NA								BWM						16.8571		1	231	223	350	2.28571	63.7143	66		0.9695		-11		63.8369	73.8172	60.1105	48.3026	34.8219	63.5004
17165	17175	WBGene00006825	unc-96			F13C5.6	O76566, H2KZR3	H2KZR3	MSETEDVNLNLDPEKPKVRSVVRSDSGLENEIPKISGTSSALIEEGLSLLNLKSSLSPNVAPVAVDLLDRTCPSPDYGLTSERLASVKTPRFKRIDFDDRLEDLNPNKPAWKSWQENIKDSYHKVKVSAEKKREDNEFMDNMMLGRARPIRGESPYRNLSLDTGFIPSVRSRSSIMGPSLSDRSRLATSSSTTNMFNAGSGPYAAPALTISQGIESRYEERANNVELMLLKNAPLPERYKSITTREFRRAPEPSAGSFSEQDDYDFSHYTTARPYYSRPNRDDPDYFDFDLQHSVDMFKRPEGRYIPRKPQEWENKLISESTGKGTAPLSGHMFTRPDTDWRNNNTSYLSAALRTPKFWEQRFENIGKHVRDSNPISLESINRNRPVTSRFTEYRDPDY…	408				flat	NA	NA								BWM						5.88235		2	295	269	408	6.37255	65.9314	72.3039		0.7553		-7.153		80.565	85.5662	62.8519	91.1226	44.1538	93.859
17166	17176	WBGene00006826	unc-97			F14D12.2	P50464	P50464	MDSDHNHINGDLAHGFENMVCVRCNDGFSMQDQMVNSSGQVWHSECFVCAQCFEPFPDGIYFEYEGRKYCEHDFHVLFSPCCGKCNEFIVGRVIKAMNASWHPGCFCCEICNKQLADVGFLRNAGRALCRECNEREKAAGHGRYVCHKCHAMIDDGQHIKFRGDSFHPYHFKCKRCNNELTTASREVNGELYCLRCHDTMGIPICGACHRPIEERVIAALGKHWHVEHFVCSVCEKPFLGHRHYERKGLPYCEQHFHKLFGNLCFKCGDPCCGEVFQALQKTWCVKCFSCSFCDKKLDQKTKFYEFDMKPTCKRCYDRFPTELKKRISESLKDRDVENQRRSMSPGPK	348				flat	NA	NA								BWM						0		0	21	0	348	6.03448	0	6.03448		0.4953		-19.466		51.0734	31.7367	39.1722	58.9732	24.1268	92.9821
17167	17177	WBGene00006827	unc-98			F08C6.7	Q19203	Q19203	MDDDIFKEARKERDDFEELMNACDLAKMSVKNNEMVHGLETFGINGESSENGNKEKPKEIMKVVAPTVEAYVGSSSAQTPTKSSGGALDGSDQQEVRQDGTSVQKDDNGFVFYKCRFCGLTFNFMNTLRAHERIHDVSQPYVCGKCGDSFEFACQLEYHAAQHSEIDGYKCECGRTFFSYTEMLYHKHTDDPLELIGAPETTTIKVSKKRVLPVSEQDLPQPAFVTEGYEPKHPLRVYNDVRSKPYICEYCSKSYSDSRGLAYHMYSHRGEKYFNPRASRYMMGREGVGYTDSRSYYLFPRTSGYVTPRF	310				flat	NA	NA								BWM						0		2	308	308	310	0	99.3548	99.3548		0.7931		-11.318		58.0201	51.8226	39.9975	48.3026	45.1904	70.0639
17079	17089	WBGene00006832	unc-105			C41C4.5	Q09274, H2FLG1, H2FLF8, H2FLF9, H2FLG0, E5QCG1, H2FLG2	Q09274	MLHLAASRNSQINSSLRNIRMNGHLDWNQLRKSFEKQSTFHGISHAATADGKWRWFWYTAFTICLLALLIQIFFLISKYRQYGKTVDLDLKFENAPFPSITICNLNPYKKSAIQSNPNTKAMMEAYSRRIGSGDKTEGIAAALSATGGLHAKVRRAKRKAKGKPRLRDRRYHQAFAQCLCDIEQLTGDRKGSCFAAFKGKIEIDTNNTAGFMNLHTSRCLCQLDTVSKALWPCFPYSSWKEKLCSECVDNTGHCPMRFYKGNELYENIKEQVDLCLCHKEYNHCVSTRDDGIILEISPNDELNDLDIGKKIASQLSAQQEKQAEVTTTEAPTVTQALGFEELTDDIAITSQAQENLMFAVGEMSEKAKESMSYELDELVLKCSFNQKDCQMDRDFTLHY…	849				flat	NA	NA								BWM						10.6007		1	172	85	849	10.2473	10.0118	20.2591		0.6922		-13.29		26.0747	69.2213	59.1575	18.0128	28.5876	11.4149
17082	17092	WBGene00006836	unc-112			C47E8.7	Q18685	Q18685	MAHLVEGTSIIDGKWQLPILVTDLNIQRSISVLGNLNVGGLMLELVSECDVERDWSDHALWWPEKRRWLQHTRSTLDQNGITAETQLEFTPMHKEARIQLPDMQMIDARVDFSVNSFKATKKLCRDLGIRYSEELSLKRYIPPEDLRRGTSDADNMNGPLSMRPGEESVGPMTLRKAAPIFASQSNLDMRRRGQSPALSQSGHIFNAHEMGTLPRHGTLPRGVSPSPGAYNDTMRRTPIMPSISFSEGLENEQFDDALIHSPRLAPSRDTPVFRPQNYVEKAAINRGWLDSSRSLMEQGIFEGDIILLRFKFMNFFDLNPKYDPVRINQLYEQAKWSILLDEFDHTEEEATLFAALQLQATLQRDSPEPEENNKDDVDILLDELEQNLDAAALNRRSDL…	720				flat	NA	NA								BWM						6.11111		2	114	90	720	3.33333	12.5	15.8333		0.0786		-4.393		67.9071	87.7401	64.2127	45.1511	41.8718	39.9067
8675	8734	WBGene00006863	gyg-1			F56B6.4	H2KYQ5	H2KYQ5	MSEAWITLATNDNYAQGALVLVHSLRTAGTTRKIHCLISNEVSAPVRKQLEEHFDDVSIVDVFNSNDSDNLRLIERPDLGVTFTKLHCWRLTQYTKCVFLDADTLVLRNADELFTRPDFSAASDIGWPDSFNSGVFVYVPNNETYRQLVDFAVTHGSYDGGDQGLLNDFFSNWRDLPSEHRLPFIYNMTAGAFYTYAAAYKRYGANTKIVHFIGSVKPWHGSAAVHTGEHFQQWQKIYHAHVNHTSRTNEHAAVFPSHHHTPEHRSHSADHPKIERKDSIVREIGNFVMHVVQSVNILPSYDTDANTSDSHRNNEPHKHDQQREEHHELPHNKFQTPHEESQDIVGSTDCFGSQMPKYNADSETDREVEQITNNTPCPAFVPFERREEYQAASPSTEER…	429				flat	NA	NA								BWM						2.7972		1	157	155	429	0.4662	36.1305	36.5967		0.0529		-11.893		39.5775	69.7396	9.35888	57.7598	38.6441	52.1322
4370	4432	WBGene00007126	dhcr-7			B0250.9	G5ED82	G5ED82	MKELNRIRRSSLGGSTSSLTRRSSISQKDIQALQETLQKQQKVSAQMVLALLIIVPPATFFLFYSISIHTGLFVPTITALFLRFPLVLQCVPPVWDTVAWKFSAVHCAIQLIFYWVLPHDQALVMSSAGDQMREVNSFFSCILTCLLYVLGASAGVYRGDLVYLHFNSIILIFAIFAVLIWAALIATYHFGTGNSVTTISEFWFGIENHPKILDIDLKSFIRTRFTFVIWPLFVISAMYFHKITYGQISTSLVCLSSVQLLYIFQFHWNEDLFLNSLDSKRCDFGFYRIWADFVLGPIIYTSPVTILVATNRSVGVISNCLFCAVAIGSMVFTAKCDRQKYEFRKSKGTLKVGGVDAFFISAKYRTDSGDANTNLLLGSGHWGVCRHPNYASEAITFAA…	457				flat	NA	NA								BWM						8.53392		1	48	48	457	0	10.5033	10.5033		0.0635		-17.214		4.40678	3.22034	1.39769	11.0268	18.4205	16.8337
10915	10973	WBGene00007139	mnp-1			B0285.7	P46557	P46557	MTPPPASPSKKAKSSWLLIALIAVIIGIILCAGVITFLTLFNKNGDGPDMDWQNATEVPLTTTSKATVSTTTTQSATTPSTTTTRIEETTTTTSGAFDESVKNSEASTSTIPTTEAVPTTTATDAPEIVMPVDVASILKDKTKDFEIVEKCAEIQALPVSCTPSQSPLTSDPSKFQPIHYVLNITIRDVRKPVLEGHMQLFASTKDQVQAISLHSVKIHNLENRDRIHVVNCNTGETICVSRVHQIDDLIHLELAQSISSGVNLRVDIDGFISADSGPHVFKQIPTAKWRVPQMIGSVFEPTSARHVFPSFDLHNQKSTFNLCLNHGPSMSAIANSLINPNVSTSGISCFEKTVPLIAQQLSFVAFEKTNPLFYNTTTMDGAYLPEIDMIFNLNAKNFK…	781				flat	NA	NA								BWM						10.8835		1	169	165	781	0.512164	21.1268	21.6389		0.8504		-11.821		3.04348	42.3041	10.4274	2.02407	4.4903	4.64505
677	744	WBGene00007155	B0379.1			B0379.1	Q9XU45	Q9XU45	MGAFDRVKAQVASDSKWTSAPYKGFVAGSPSNTYIDIVSTAFEDATNTMNFARHSKYDEMYSPYLGSFRERHNYTSIAPSLCINKTNRAIEYDLAPHKAYNPRQSEWLLEKDKKYRVRGARNLIYTKSASDISLPPLTRRTFTVPTDTLRHQNQFLYWNGRALGLDYVAPFLRREDYSRHEDRRYQRIYWSPHFIDLLPSCRHSAHLMLSAY	212				flat	NA	NA			1.3383	1.32178	0.000988391	0.000131326		BWM						0		0	35	0	212	16.5094	0	16.5094		0.0096		-13.382		33.4218	48.9266	4.73594	68.3911	52.2034	67.5682
2688	2754	WBGene00008191	C49A1.10			C49A1.10	O45310	O45310	MAKSYVPCSNLKTAGLVVAVVELFLCALAVYGLFRNFHLFGSNYFIWFLLGIISVFIILIAIALFVYAIKSENARWLIPHLSAQIFLVIFLILVAVIVAILMLFGAYRGIRNLLGVSNYYMSDDSTFLLGIMIIVIYLLVALLEIFFLYIVYRLYKHLCHYESIDNENRVNWQVVNDFPKDNKHGSVAMGDQYPYGDERRNDANNGQRYL	210				flat	NA	NA								BWM						18.5714		0	52	0	210	24.7619	0	24.7619		0.0054		-15.094		10.7345	8.59985	1.39769	33.9008	39.6782	43.5077
2798	2864	WBGene00008254	C51E3.9			C51E3.9	Q8MQ99, G3MU39	Q8MQ99	MVRVKFGKEQYEAIKKFEVQHHGDFWKLIMDKMGKSDGLSILDVSEEACLFALTLAENHPTNKLTIMTSSVRPTFDFPVNVQYHKGSILRNADSIAQSGPFDLIIFNEISHDIGDIDGLFKKLKTLLKDGGQIVLFSRPKNPPLPVPDICLMLWRKLAATKEELLASANAAQLNSTCFSAAVPISVDKVQWENILYSGCFPAVKNTPKCDERTIRDFCVSKSGKFEFEEKLLIVMLRK	238				flat	NA	NA								BWM						5.04202		0	0	0	238	0	0	0		0.0088		-20.773		39.8256	44.6156	18.8578	49.4154	59.7028	65.9175
4656	4718	WBGene00008447	E01G4.5			E01G4.5	O17740	O17740	MRMKFRGLSKIKNRTVLHNHVAKLFDIFIRGVIQKAEGDLEHTKFWLNLTHSGYEEGEGHHVQHKTYQTVDGGVLMNILARQMQSNKSIKLDKSFVISMNVFKRKDKSVAGRGRNRASLPPKGTRDVNRMRQFILEHTFGVKNERICGPSHCLPKALAVGKLLFDKKRCPDSVERAALENKWQSVAKSDATDEHKSTSELKMAKQLLEAAGMDTEQEVHDRSDLARLASHIHEYQIKLWTCNGRQPVAYIDAEYNPEGTKFIGLFFYDGHYEVVDHIRGKKGAHFCDKCYQFVEKNHAKNCEKKCRSCGHFECGQQEKDVVCDTCNVTFKNQMCYDNHLKKVSQQALPHCEKCFVCRDCGRLDQTARFRGHWLHTLKSRNSLVLQ	385				flat	NA	NA								BWM						0		0	20	0	385	5.19481	0	5.19481		0.092		-17.619		57.7696	56.5782	39.1722	39.7568	55.9445	76.0771
13837	13861	WBGene00008538	sqrd-1			F02H6.5	A0A061ADY3, O62133, C6KRP5, M1ZJU1, C6KRP6, M1ZJZ0	O62133	MRTSTVVYGKHFKLLVVGGGAGGLGAASKFARKLPRGSVGIIEPREDHYYQPGFTLVGGGLMSLEANRGKQKDLIPKNATWIQDKVQKFEPAKNSVKLRGGDEITYDYMVIAMGVQLRYDMIKGAKEALDTPGVCSNYSPFYVEKHYKEAMNFKGGNALYTFPNTPIKCAGAPQKACYITDSILRQRGVRDQAHMIYATSLKRVRFLLCWDIINHGAIGNQKSKKKIRKHQLVTIDCFDNNILKQYNNFFFHLFGIESYLKSLEKVARDKEIDVRTRRNLIEVNTNDRIATFELLDEEAKPTGKTEQIEYSLLHIGPPCSTPEALRNSAFVDKTGFMDVDGGSLQSKKYPNVFGVGDCMNTPNAKTAAAVSSHLKTIEKNLTQVMQGNRPCMQYDGYAS…	471				flat	NA	NA								BWM						2.9724		0	9	0	471	1.91083	0	1.91083		0.0398		-10.558		36.5831	47.9833	22.4662	48.3026	75.0725	27.5387
5347	5409	WBGene00008744	F13D12.10			F13D12.10	A0A2C9C2U3, Q8I4L5	Q8I4L5	MYEEEVEGCSKYKPTMRFAAIVVATVILMSEVSLAIFEYIHCRVDGNPLSAVFAAIFTFHSLFTTFYIIGAFRLVECLMVPWLTLQLIFLTTFAMFVVVWWIATLLSIFNLVQYYHTPSDQGLTNAEFFVLTGIVLTLVLFLCMKLSHILYKGFVSVRTQNMTRYRITESVQRTDSVLKPSYV	183				flat	NA	NA								BWM						0		0	31	0	183	16.9399	0	16.9399		0.0104		-23.643		12.196	6.01326	1.94056	31.5942	33.8467	52.7733
5536	5598	WBGene00008894	F16H6.4			F16H6.4	A0A0K3ARY7, A0A0K3AUT5	A0A0K3AUT5	MMENDAEGEIADMLSMCNKYPDFDDEERVRRVDDDFRDVITVFDAPFEGKSPSPAVIVFDELVDSDGSSKYLNFKMEQSYEKVDEIPEKIDAERIRYAIHLGSHSQKNVLQIFQSAYSDGYTEEDKNGKVPVGGKVKCAETETGFRTKINCENVVTAVNEYMDSNREKFGELRIETLNKAERNLDGYIYFSFLKQKPCRNLFIRIPPLEHEKKIATDPISSPTKLHFISFFFLFLVSYIEKEPGKMMEIGAQGDIADMLTMCNNFPGFEAPMRYMIENSHDVVTVFDGSPAVIVLDELVKADESSYLPFKMKKSYKKVDEIAAKMASEEIHFTIHLSSHSQKNVIQIFQSAYSDGYTEEDKKGKIPEGGRVKCAGTETGARSNVKCEEVAKEVNEYIDS…	435				flat	NA	NA								BWM						6.43678		0	8	0	435	1.83908	0	1.83908		0.5045		-25.137		29.214	51.8226	46.7207	22.8101	17.8629	33.8909
5537	5599	WBGene00008897	F16H6.7			F16H6.7	Q9XV94	Q9XV94	MMESDAEGEIADMLSMCNKYPKFEDDDMERYVITNPHDVVTVFDGSPAVIVFDELVKSDTSKYLSFKMEQSYGKVDEIAAKMVTEEIHFTIHLCSHSQKNVIEIFQSAYSNGYTEKDKKGKIPEGGKVKCAGTETGARSKVNCEEVAKEVNERIDSAKDKFGEFWESGEKSRRLHLFQFYEAEVS	185				flat	NA	NA								BWM						0		0	7	0	185	3.78378	0	3.78378		0.0217		-29.955		44.0948	47.9833	23.4439	48.3026	51.0366	66.7281
6195	6256	WBGene00009358	F33C8.4			F33C8.4	Q17680	Q17680	MERTEAFNKARAQAEAGTLDDAFQTIEQYTAEDGIEYSLSEMQTVNIIVCEKLTSCSFEEKKDACLACLPLLEGCKLVKSAEWLELYLDAVYDVFSKLSRYARDEERSEAWNRVKEIYYEVTLAARKVWKEKNLPGGLEVYVSYAKLVKSYLDVADEDSFKICESYAKEAKFAGKGTLEDEDYRDTKKAIDTINKMITDAKHEKELIDDDED	212				flat	NA	NA								BWM						0		0	10	0	212	4.71698	0	4.71698		0.0023		-36.796		27.5952	43.4169	8.11594	41.4616	80.3144	54.0604
6364	6425	WBGene00009475	F36F2.1			F36F2.1	B3WFX8, O62234	O62234	MSIACARIDKTIFKFKEMEQNVATQSKDDVYSKDFTQKKMDKSSSEYGRPKPGTLTEQRAKKAAAHVHREMLTLCEVVEDYGKQEKEGDPIRITFGRLFTIYVNISDKVVGTLLRARKHKMIDFEGEMLFQKRDDHVIITLLLSGAQLKEAIRAHAAANPKE	162				flat	NA	NA								BWM						0		0	34	0	162	20.9877	0	20.9877		0.0064		-31.039		41.4861	45.8413	21.5328	49.4154	61.1373	69.2459
6430	6491	WBGene00009514	F37H8.5			F37H8.5	O17861	O17861	MDTTCRCLLTPTIQPVLLKMLYRLVAAILLLGAVQATINCAAIPTSLWCSNKDLEAKCGFASFCDKHRAATHNQKINITVLIEALCPDCQNFLTKQLYPIVFKNFANYVNIELVPFGNAKVLEDGTIKCQHGEEECSINKFEGCFIDSMQDQSPLPTLSCIEESLQKKVEFADAVQQCFEKLQIGGDIQRLTQSCLVSKLGADLQNKAAAATANVWPEQHKFVPWVIINGVSLTSFQGFQNQLPTLLCEWYSGDKAIPYCEAALKLKYKKASIRSFF	277				flat	NA	NA								BWM						0		1	45	31	277	5.05415	11.1913	16.2455		0.2993		-15.711		18.6244	29.2533	8.51388	27.0572	57.1088	43.5077
6830	6891	WBGene00009781	F46C5.6			F46C5.6	G5EGI8	G5EGI8	MVAATEMDGESIVDIKHDQIEDDETEEKEPPVMKLDFEKLFKMAEDPDLEELLRSPLDQALINLEDGTEIQKLTSIRTFPDILDTSDGEKCLLKMLPAIQKCLKIEKSNLDLHCEAAVVYKSIIQNEDLVKKFQGIVDLLLENILQNIQNQKEHHTQEKEKIVIKAGSSINNQMHHLSAAAWLETIVEVADKLSLSSIKLYVVPVIQTQAEPVQRVQRRIIATKIIHKLALFLPPNEIRKELCPIVTTLCKDANSNVRVAVAQRLFVIANALKNSHDVVSCLLPSYVHLLNDEEMNVREAAMNSLTDAFSLFTRDARKHTLFSVIKKLTEEALEKKNEGLAVISNNFGKWSWELNELLDQLDKSWVLNTYCKMVQISDELCEGPQKNIRNVLKKTCCFN…	945				flat	NA	NA								BWM						14.709		2	295	289	945	0.634921	30.582	31.2169		0.7497		1.366		18.8848	60.8008	84.1317	9.04937	4.11201	8.29772
6877	6938	WBGene00009819	F47B10.8			F47B10.8	E0AHB3, B6VQ68, Q20508, E0AHB4	B6VQ68	MSKDRNIIYYRDLYYYTVMFADANGNENGNGNGIMKTPQRETVVSLGFTEDPIPPNSYCCNSCHIQKACRAVAVFAFLGFIINLVLYFMGISKLGLNGYLEAFLLIFDCISLLTLFCGVSKQRSGLLKPYLFYNVIWNFGMIILFLVFVYHMLKGTSDVSRNILDNLKALRSNPDEYHFRSRESVTTAILVTLGVMAAMSFVIVINCIFLHVVYRTFQFFAYQEDKKREEMDKKERL	237				flat	NA	NA								BWM						9.70464		0	48	0	237	20.2532	0	20.2532		0.0074		-12.283		14.7949	7.5608	3.10243	38.8406	38.6441	62.7733
7201	7262	WBGene00010032	F54B11.9			F54B11.9	Q20743	Q20743	MENLCTPQKTCFASPKNCIIENCHIIISISENTTELYTYNLDFTEIVSIYTYENNRRQDNMVLCFGGLAKCFLGREEKRESYRIERKQITELNTIRGIYGQYLYKFPRILFETGQNFTYAYRTSDPGDEISRKWFVKLHHFPGSKEHSEFRLNLDDIDSKTISELYETYGNMSPPDEYETDIPVDPIPRNKKGFVNTISIHDLLRDRFVSNTSAPIF	217				flat	NA	NA								BWM						6.91244		0	10	0	217	4.60829	0	4.60829		0.0221		-25.979		26.3572	11.8251	8.91427	57.7598	25.5859	79.0862
8734	8793	WBGene00010385	H12D21.9			H12D21.9	A0A486WWW4, Q9XTW6	A0A486WWW4	MPNFPPNVYYRDTYGFDDRPSESDNDSITTKSTVTVRTTYNINPGGGNGGMAINPTYQHIHNRNMNTGGDPSKMVNYSHVSNSFHVEQLVTSKILTPNPRTILICVLIAAASAIQLLIFSMIAVFYDGPFPWSLILCILMLCNCLVVFIFIRCQPTRGWLISSLIAAALSFIECTALFFWTALLISQEEKYLESVGIHDNRIVTSTRIAMYMCQMLFGPIHLIACGLIIWKLRTQLSPSDEVVNGYFLSEPELGHQKILVPIELRQIRDQSDDETSNASIGVQTGGSRNN	290				flat	NA	NA								BWM						12.069		1	94	68	290	8.96552	23.4483	32.4138		0.1254		2.921		16.3424	9.6733	6.61263	58.9732	27.8261	36.0206
8607	8666	WBGene00010593	gsnl-1			K06A4.3	Q21253	Q21253	MGGTSLDPALAEIGKKNGLLVWRINKFVLEPVPEVDHGVFYIGDAYIALYQKYDGCWDVHFWLGKNASTDEIGVAAIKTVEIDDSLGGIPTQHREIQNYESPLFLSYFPDGIRYVSGGYESGYRHVDDQFKNWKPHLFHCKGKRNVRCTEVECEVNSLNLGDVFILDLGKDLYVWMPPESGRLERIKGMARAKNIADHERMGIPKVHILDDVEWDNDSTFWSYFGGVSSVRKVSKGKDDDDNYWKRLTEQITLWKVSDASGAAKVSMVSQGENIRKEQLDPKDAFILDAINGGIFVWIGHECTLEERSKALIWGQNYLKQHHLPRWTQVTRVLESAESTQFTQWFRDWVDEKKKNTFTPLLFQVSDESGLLHVEEIANFTQEDLDGDDVMILDALNSIY…	475				flat	NA	NA								BWM						3.36842		0	4	0	475	0.842105	0	0.842105		0.0159		-20.683		23.1049	53.8369	14.4461	42.3409	41.8718	37.0818
9779	9838	WBGene00010703	K09A9.6			K09A9.6	G5EEF4, A8WHT9, A8WHT8	A8WHT8	MTANGNANPAFRRQASTAGVNPVLTVALTPVPKVDYSVTKGGARTWIVLLVFIFLCSSLYTIFSAKDAGDSHHDLSSHSSADDDDVPAYNHPGSATEDDDDDDDDDEPPTPSPRVSKKQEQQTTQQKTTQPAAAQVTDSDDEDDEESNEHTLGGRLFAGLRKKITDRLNEKAVKEEPKSKNDQILNPRELRKLKKQQKTAKVEVVEDDDDDDDEDDDDVEAPAPQEPSRKQKAHNQREEKKDKNKKYQPVKEEPDLDDDDDDEDDDDDDGDDDDDEKDDGNDAEKDDGDDDDDDDDGNDDDEEDGKNKKTSVEAKSDKVVEEKNDGDDEPHVSHREAQRLRRQHLRESRRDNRPRQGGNRECIHQDCPNRESLKPRKSLLVTKKKTKSMVERILDDEFD…	872				flat	NA	NA								BWM						22.3624		1	442	442	872	0	50.6881	50.6881		0.71		-14.312		51.0734	96.4677	85.0258	8.62933	3.88111	33.4046
12582	12610	WBGene00011003	R04B5.5			R04B5.5	Q21702	Q21702	MSQDNLSAVLYGVDDLRLEQVPIPKPGPNQVLVKVHTVGICGSDVHYWTHGAIGPFVVKEPMIVGHETSGIVSEVGNEVKHLKVGDRIAMEPGLPCKLCEHCKTGRYNLCPEMRFFATPPVHGTLSRFVVHDADFCFKLPDNLSFEDGALIEPLSVAIHACRRGNVQMGHRVLVLGAGPIGVLNLITAKAVGAGKVVITDLDDGRLALAKKLGADATINVKGKSLDAVKSEIITALGDQQPDVCIECTGAQPSIETAITTTKSGGVIVLVGLGADRVEIPIIESATREVDMRGIFRYVNCYPTAIELISSGKLNLSGLTRAHYKLEETQEAFKRTQKADVIKVFIQC	347				flat	NA	NA								BWM						0		0	3	0	347	0.864553	0	0.864553		0.0199		-28.344		29.8109	15.0454	33.7951	41.4616	19.6414	30.8622
12613	12641	WBGene00011026	R05D7.1			R05D7.1	Q9XVK8	Q9XVK8	MQANYDFPTIVNHSRAVQVLCTIFQMVLIYTESAALSFLTFICYSLLVGMHMLHLARRWYYNIDGRYDVRQIIRDNEITLKLQYAVAIFSPLLLGFLSWTFVELNNGLVHSLFHLSVITQVALAVGQLGLEFYEVCIANKSK	142				flat	NA	NA								BWM						0		0	6	0	142	4.22535	0	4.22535		0.0036		-23.714		17.4724	8.59985	2.90101	56.5291	52.2034	61.3142
15373	15393	WBGene00011331	T01E8.1			T01E8.1	G5EF30	G5EF30	MVKSLLNLCLSAVCQHELNSELSFIPVECRQKLLEFFCSHDQLSASDCSTLVCSKYFGCNIPSLTFYLSAELTDEMLNQLTTNNKYVEKITLVDCPNVTNLGAQAVTTGQILLRQLELRAMHQLTDQCLENVYSPFLYSVDLSGCGKITSQGIRTLLIKNPTIGCLYLNHCRSLDDQVLYDIAHYVGDRLHVLELDFPTSLADPAAALHYLSSQCPNLSQLSLARFFHENLEDVENNVQFVIDGGNLKTLDLYGNYFSLMPQLPPTVQSIRLSVSGDEDSQQLLSTLMDQPFLNSINLIVSVREANIQAVDNANHLLCAIIPLLGHKITKLQISVPRLFDEPLKLVTEYLPNLTHLSLEINHLNTNILQKYFAGGSKSNASKLKCLKICRMRMTYRVLF…	535				flat	NA	NA								BWM						0		0	1	0	535	0.186916	0	0.186916		0.052		-12.107		13.8639	23.1565	41.6581	48.3026	27.8261	24.2741
15405	15425	WBGene00011374	T02D1.8			T02D1.8	G5ECA7	G5ECA7	MSLTNEQAESILAPLMKKYLDALNTSNWKQVENFYHVNSVMIEKGKSCMFGNQAIVDSFKGMGADFGKYEVQISNSRYEGVGDFVNIHTDFSFVTEKQGTLSGKFTQIWKKEDGKYAILHDQFEL	125				flat	NA	NA								BWM						0		0	4	0	125	3.2	0	3.2		0.0061		-17.261		55.8143	37.8728	19.7494	74.65	82.6333	77.6026
15472	15492	WBGene00011422	T04B2.3			T04B2.3	Q22147, Q1NZ27	Q22147	MSRVFLEEADRPPPAYYQNNNSKEQEPLKIVPFQTPDPEKWISAPEFVPRSKQLADAFGFPATDFDNQNIPKATQFDPNYYDFSHQNPFSPQSISMNTPAPFNGIPPGYTANMTTINPGNGPPIAAILLRKKRKRRSKHSTNSMVNAHSTSPCSSHPSDPNGDISSCDEFQKHSDVEHNDLSGSCPDLTAQQIQKWDDYLYETAKAVNENGVLHESTGERTSEDLSSSVYEVAAPGIMETLTQTISGTSNKELQKLDQEINGNVMTSSMVLRKLANHTFISDGCSEKTLEQEMKDLTFRRPITPQRYGYPQIDNNVSPYVHLATLDSKKKKVTNHLIDKDALKAYLDEEEEEEDFLEGLNITVNNFDTCEDLSLSDVEQPSRFQQFQDAIRKNTIVIST…	412				flat	NA	NA								BWM						3.64078		3	189	118	412	17.233	28.6408	45.8738		0.9555		9.698		80.9899	84.4485	57.0056	91.7956	43.0189	78.3616
15557	15577	WBGene00011479	T05E11.2			T05E11.2	B3GWC2, Q22234	B3GWC2	MASRGRICCIGFSSTFAIVSMILLAICMFSASFRYNLDNLGGVKDYGLFRFCYTPKSQPLSRDDDSNSKTCHLRNYINSAHCQEGGSHTQPSRDCFGDFELASIILISASLGCCILAICFAICTIFTSFGALAHSVVLIAAAMCSLSGFLTYTYYYELKDNQYELVSGYQFQIHYGWAYYVFGFSSLLQWAAFVCSLFGSAFVLVHKNKKRQSKVTSTSL	220				flat	NA	NA			1.37027	1.76387	0.0112497	9.17865e-06		BWM						0		0	49	0	272	18.0147	0	18.0147		0.1568		-15.52		17.1801	6.88283	5.77254	36.2024	65.2837	49.0346
330	397	WBGene00011573	anmt-3			T07C12.9	Q22279	Q22279	MTVNIEIQTNAANESLPIIQNIPTEVVRELDGEKLLDRTTFFTEFSTNAYLEDFYTKVDDPAMQMVLTFLPNIVARIGKVDKMLDFGAGPTIHVAACFRETANEIHLADYLPQNRDELYRWVNNESKFDWTIPLRMILTREGRTWDKLSTVEPETRDKIVDIYHCDVFQNPSVVCPKDIYGQFDAVVTIFCVEYCCNTLSEYYNSIKNTAGAVKPGGYLIYGGIFEETWCSFGGRKFTCLYITKEVMLDALAKADLFVEENDRGCVLYEINGMFMVSAKKRAA	283				flat	NA	NA								BWM						0		0	9	0	283	3.18021	0	3.18021		0.2056		-24.023		14.2643	18.3837	2.55711	30.8057	30.2235	43.5077
15653	15673	WBGene00011579	T07D4.2			T07D4.2	Q22306	Q22306	MFSKSSNRFGTTSIFGDQSIKDEYRNRQRRLSLIGGPISGTSPNRRESLVRELRTVSLHQYTEDPTLAWEMLKEKRPVKPVRQMRLDTPVKPDHVRFVCIGCTHGEQFDISKLPPGDVLLVAGDFTSCGLPNEVHNFNKLLGKLKYSYKVVIGGNHECTFDDTFLKLKQESEPKEMALKQALLSAIHSDSKGGISAKDLLSNAIYLEDNVIELFGITIYGTPWQPKVDNWAFNLSRGQQLLDKWNLIPAGVDVLLTHTPPLGHGDMMNNGQRMGCAELLNTVFKRVRPKYHVFGHIHEGYGCTTDGYTKFINCCMCNENLDLKNEPVIFDIPVHPHTKQFYIQNVKKIHKRFQKKK	356				flat	NA	NA								BWM						0		1	57	47	356	2.80899	13.2022	16.0112		0.0419		-14.879		65.5097	37.8728	49.2901	90.7394	33.8467	83.014
15836	15856	WBGene00011727	T12A7.6			T12A7.6	Q95ZP0	Q95ZP0	MAVPRRSNVQSMRRLLETKKEKTEEKEKDKVPTLSEICSSSITTSLFQNRIRWRKLSDLAFEFRYFSNDLKIPKPIQKSLRTAMENVLAEAKRWDAKHLEMFVEPAKSKRRALPKSELLRTFYSKLVWKRHSCEIDDVATCSHLIKTECKNWPLMQFQFACLYAKTDLIYDDWKFDNYRLSCFRKQVGDHPVYDFWLTMMATINKDREFFGSSRRLPNQKVAQCFLFAIRNGYLQLVEYIWNQITDRDREAIGLIEWRNMCYRARDGDAISFLCHNLCRMNALGTCRIAWAAFFDAFQHLVHDEKGKNDNLEKNQYRRKFEFLLKHTCPTLRSRLVKHEHFRLLCDAFRYNEQEIFSLLHMYMSPADIASAREHIDRIFDRNKTKSGDRLRRTLMRRQQ…	402				flat	NA	NA								BWM						5.97015		0	37	0	402	9.20398	0	9.20398		0.0103		-21.581		19.4522	39.0248	9.85753	32.3753	27.0376	61.3142
9104	9163	WBGene00011906	hsp-12.1			T22A3.2	G5EE65, O01263	G5EE65	MHTIPITTDSAASWDWPLQHNDGVVKVTNTSEKFEVGLDAGFFGPNDIDVKVNGIEIIIHLRHDNRPTEYGIVNREVHRTYKLPEDVDPSTVRSHLNSSGVLTITANKL	109				flat	NA	NA								BWM						0		0	10	0	109	9.17431	0	9.17431		0.0068		-29.231		46.2122	28.0619	18.8578	70.985	49.8624	76.0771
17438	17446	WBGene00012252	W04E12.7			W04E12.7	G5EE34	G5EE34	MMENDAEGEIADMLSMCNKYPNFEDDDMERYVIENSHDVVTVFDGSPAVIVFDELVKADVSKYLPFKMEQSYEKADEIAAKMATEEIHFTIHLSSHSQKNVLQIFQSAYSDGYTQQDKDGKVPEGGKVKCSETETGARSNVKCEEVAKEVNERMDSDKDKFGDLKVESLGKAERNLDGYTFFSFMKQKPRRNLFIGVPPLEGTCTKEVVHEAIKEILFYSYC	222				flat	NA	NA								BWM						0		0	26	0	222	11.7117	0	11.7117		0.1077		-23.731		41.4861	54.7949	30.2456	55.2788	44.1538	68.4107
17486	17494	WBGene00012291	W06A7.2			W06A7.2	Q23186	Q23186	MVKIVTDGDYVPWYSRRAPPVFCFPCLPAYMGIWPARKCVLIIGALLFFFGVIILLAMLLTCIAIECAGVASALIPLALILIIVGILLFHCGYAAHLLDNHGEIPIKKTTTTTTTTVMDPESHEDEIRLFETVHREQVPNVRQGFWQFDENLSWQAASNPYPIQHTLKNCLERQPY	176				flat	NA	NA								BWM						13.0682		0	20	0	176	11.3636	0	11.3636		0.0131		-25.255		18.3591	7.96365	4.28887	45.1511	36.7109	62.7733
9142	9201	WBGene00012437	hum-9			Y11D7A.14	Q9XWR0	Q9XWR0	MDSSSGIDLEPNILRHLQTKKVEERIEDLNNQIWIEDDLYGYRMVTVIDEGLSDLLVGFRDEQGFFEKKRIEKTKCEVPSLNNYSEDLCTLTQPNAATVLNALKIRYTSNVIHTFCGLFCVVINPWRNIPIYSDEVKQLYQLQNDLPPHVYSVAQNAFHGILKGGRNQSILITGESGAGKTENTKKIIDFILSSSVSNNTIGDCVVTSGVLLEAMGNARTTHNSNSSRFGKFIRIEFDENSKLIGAKIECYLLEKSRVVFQSDGDRNFHIFYQMLSNYFDNPHKSFLKLSKKVNEYKYLRNDDSMIDDAETAKMTDEAFTRIGLSEEEKIWIFQILSAVLWIGDIKFGERSGLDVSFVESMQEVDNIAELLEMKSSKLVDALTQPTIKVHDKLIRKNQN…	1464				flat	NA	NA								BWM						7.78689		1	179	138	1464	2.80055	9.42623	12.2268		0.1964		-13.146		15.3328	92.0142	93.3923	3.72636	13.9204	2.00933
17928	17935	WBGene00012478	Y18D10A.8			Y18D10A.8	Q9XW13	Q9XW13	MLHNYDDFGGGKMQGAPQVPRNTLLSVDQQLQLMNTINNMVRASQFTSQLANTIFTLCAQLKTSGSMLEQSHKNELNKVFTSLRQACCRDNGQLGTPCRLKIMELVELRAMNWRTNLAHSQYYVNRPEGQHDPAPTVGIPPSATSPPTQVTSSVTSPVPSSPQPPMQFVPQNPMMFQDPMAANHNAGGIFFIPAASTWMNPLMPMPPNPFLPHSMIPPDHQMFLRQRSLNKKPNNLMNKTLQLRHEMIIRNSDSGKIMGVKGRRVAAVEQLTNTVISFQKVDSKSKERTLTITASTMEDIERAKDMIIDTIRRNMSPMRTDMSIPPPNQYSGMSSENQSIPSQQNTANIDEDDDDDDEDIKLEQTSDGKLTFHCDDPELLAAAQEALSAYLRVRARPSA…	507				flat	NA	NA								BWM						15.7791		3	194	154	507	7.88955	30.3748	38.2643		0.0805		5.975		77.9342	88.3984	55.974	84.8882	32.8764	55.4041
18372	18379	WBGene00012812	Y43F8B.1			Y43F8B.1	Q2HQL8, D9PTN8, B7FAR9, Q8I4D3, Q9XWX8	B7FAR9	MSPIMARKPQIQAEQLAQKFVEKPEEQKDKQAVQKGQQLEGAKRWVADSELREQPVNSMQQVEHGPKAVILADDACWQTQRRVPAEIQLPQVGKISIPELSEKEIQRTIVAQPASYHKVQWNEFPEEPKYEIGAVPKTKTQDWVPVNNEQNELQRSIYKPARMSAVWPPPQDELVKDGHSPLVVKANEDTAWIQQDQNGVLKQAVWGKTSRINRVWPPPENESTLSDFGPQHMPVVQWPPPEAEAHEREQVEVLQKHIPTKKMERQWPPPPPQYQVVESSGEIETRYNPAEVDQQQQAVNSLRMGHIQA	309				flat	NA	NA								BWM						4.80769		2	224	200	309	7.76699	64.7249	72.4919		0.1105		-15.424		80.8647	79.1648	58.1037	57.7598	62.5817	63.5004
18421	18428	WBGene00012875	Y45F10B.13			Y45F10B.13	G5EDA8, G5EF70, G5EGA2	G5EDA8	MPSVVADAINAVGTVFWTTVYLLYYLFKGKQEWKCEKNSQPVIQYCCVDGTPCSDHQQNGVRHRKNPPPMPPTNNNTSTFNNHVQDNHNSTPKSFHSENSGIRGFFKSLWTNVKSGSAKIWEFGKKAGRKVWSTVKCGVLFLWKVLKCVFGMIYAFIVSNNVPSQTLPSTPKPYTATPSSPSYNKVSFEYPPEKLNEAELRKVTKQEIEEEEPDEPTIYEDVSRKEEAPKKVPDTSESFYYERVFEEPKQQDHVVPEPPREKSVPPPPPPPPPPKPVSREPSRARSMTPGTRERKEVKGGIGGFKSDIMDELEEHQRVRQERSSVNREMTQSCHPDMAQWKANEVVDRASANSTPWRAASVGPTMRRLEQVVSRVEGDDQKEANFVFRPQKIVYSSEEY…	633				flat	NA	NA								BWM						15.3722		3	405	391	633	2.21169	61.7694	63.981		0.9903		8.994		91.2528	92.0142	76.6495	60.1793	39.6782	61.3142
13737	13764	WBGene00012891	sorb-1			Y45F10D.13	G5EC32, O62482	G5EC32	MMHHPHPFGSNLANSSEPQQPSGQYLNPAADAYNFDTFEDSDKFSPKGNVAALRNVIHGQLDMKTPTGNSSRYQKPAPPPVDSTPSWAKNVKVYEPNGYVDPHLNKHNMGRVLDGPVNPNKYFQGVPPASYSQVKHNESKPPVPPSTKPPHSAAQALQAQVLQSSKAPSQPQQSQKTSYRIPYDVALDPRHHLGEFDIDDSASIISSCISTFGESSEIAGFSAAAEQRHLYEQYRKKLMEEKNELKEGSETPCVSLSEKVMTSSTENLKNGNNQQNQQPEPQPPSSSIFNSELTPFGHVAPVAKQFEPTNFPPFSPEKESEIKRSIDLESSQLLVKSKSPAPYSTSSTDHYGTIRRKHKPVAIDLSKSSPNLASQSPSNLFFGASFEEKQNRSPMTSTP…	1005				flat	NA	NA								BWM						18.1095		3	266	254	473	2.537	53.6998	56.2368		0.9945		8.087		96.4824	97.3717	92.0879	49.4154	25.5859	76.0771
18543	18550	WBGene00012960	Y47H10A.4			Y47H10A.4	Q9U2B5	Q9U2B5	MDCIRVTTIGYYHRDGDMRVTPGLLPKILNRECLKPLREDFFNLNIEVPDSGQGENNMVSFLDYISQTKCLEDAQPDFVTNKQILTALTGNKPFTIHAIHLKGTIFSFKSGEVRYQDTKNFGGAFEHFCTRTRNDEQLETDDTVRKAVFKAEIPRGNTQFYRVLYSGQIDAIDNEVDRKHYELKIMSQGLNEYFWKEKSCKFYWQSVFGNAPVLIIGSRSGQYSTQTTNNYPPYSLYKVEELKRDRIPSMAARCRKIPGRFGPAPPWKISEGEDNALYFLDLVKDNVINDGDCFSFTRTDENPDWDVKRDEESAAQFRDVVLQYLDR	327				flat	NA	NA								BWM						0		0	0	0	327	0	0	0		0.0121		-14.749		35.0774	40.1646	7.33972	78.0226	20.8401	79.0862
18963	18970	WBGene00013255	Y57A10A.10			Y57A10A.10	Q9NA75	Q9NA75	MVVPESFQLDQEILLDAGAQLHRLKMYPYFDVAHYLLMIIEVRDDLGSAASIFSRKHPLSCWLSSMLMCFADAFLANFLLGEPVIAPFKRHDDIILATIIWYLVFYAPFDGIYKIAKITPVKCVLAVMKEVKRAYKVSHGVSHAAKLYPNSYIVQVLVGTAKGAGSGIVRTLEQLVRGVWLPTHNELLRPSFATKACVVAASVLALEKSGTYLTAPHDLVYLVIVGFFVYFKLSAVILHVTDPFAPIENLFCAIFMGGIWDAVSRALAASRDRRAAGAHSNENGSSISTPEKKDQ	295				flat	NA	NA								BWM						6.44068		1	33	31	295	0.677966	10.5085	11.1864		0.0148		-23.986		10.3464	10.7713	1.75387	22.8101	36.7109	22.4785
20149	20155	WBGene00014088	ZK809.8			ZK809.8	A5Z2S9, Q86D00	A5Z2S9	MVNSRKHSIVEAAEAHFDKNTLILIVNVVILLCLISLLYMVATSAMAASGSHNEH	55				flat	NA	NA								BWM						36.3636		0	24	0	55	43.6364	0	43.6364		0.0077				41.2847	22.0437	7.33972	65.9224	82.6333	77.6026
19833	19840	WBGene00014207	ZK1058.9			ZK1058.9	C9IY21, C9IY22	C9IY21	MVASSVKLDPIFEDGPLLPLLPEEKNPPGHRFHSEPTRANALAAAKRLLDDSRGQSWEKLARKYTLGLAAAPCVERLTEEELEESLETMPEYNNYRFNRSRSVDLSSISREKYLSRWSRENTPVDNEKRYASHVRRSYTPVREISAVNNVNDGNLHRSRTPLATVTAPYHTNIHYRSENEPFRKYDVYGLRTWSYPIYKYVYGREGDYRRPYSFDRNYGLTPSYTPPQLTAESRPITTRRGYSGYSYLANETHYDITSRPKSLSSYMYSNKYLGTTAAPWYWSCYGNSGLRHFNSYRPHNYTSSTASWSRYY	312				flat	NA	NA								BWM						10.2564		1	39	39	312	0	12.5	12.5		0.7843		-5.788		62.5743	77.6713	23.4439	88.9511	58.3296	63.5004
19915	19922	WBGene00014262	ZK1321.4			ZK1321.4	G5EDL9, G5EFP2	G5EDL9	MTYETISVRMNRSDRNIRWGFSVRQQADGLIIDRVEAESLSDKAGVKHNDKVDQINGRSTRGLDAASANRLIDDSFNEVRLSLQRFVTSHTTLPWTLNEKDNKMVVEEMKPGFGTGFGSGFGSSNFVNSSFNQNQNNFGSHFGTGSGVNQRNITNTNTSSSNHQSSTFHSSSHQSSGNYGSGGFSPSSHHNIPIRHSPAPPFTTSNSSYNNIKKSTDNTILPGSANYNPNNSSNYNSVPTGFGASSGGYGGSGGFKGHSNGSAIPAQAPPTSYSYNNGATSQPYGAGSGGTPLNQMTFINTSPAPGANGAYGAQCGLSPSKVFYHSPSGRSRNELSPGAAVHHLQYNSPMNLYSSEATAEQLYQQTGAVPEGPVPHDKSPAYLTSETRKLIEEEARGRF…	423				flat	NA	NA								BWM						23.1678		1	334	334	423	0	78.9598	78.9598		0.9936		21.601		93.5765	86.8312	65.1069	98.5556	98.8062	66.7281
12891	12919	WBGene00014826	R13H4.2			R13H4.2	K8ESK7, A5Z2W3, H9G321	A5Z2W3	MVSSMTDYALVRSRSALVRSRSVEPSSRLYVTRTSSVPDLTAHFRYSDKYRPQWHTVYQSTPYRWRRDWDLYDDYWYDKYYYFSPLYRSTYYPSRRYSYSDYLPNPYYWNNYGSYWTRYKGYWYDYDYPSSYRRYTDSAFNRYLNYTYTPYRSYLMDSLSTSLSRGLSMYKAGLINHTTLDAYWLTPKYWDRRFKNWRELYCSTKDNYLPSTYDRKTRQYFAQWA	225				flat	NA	NA								BWM						32.4444		0	7	0	221	3.16742	0	3.16742		0.8871		-0.68		24.6844	58.2486	3.10243	92.9526	33.8467	70.9064
874	941	WBGene00014989	best-23			ZK675.3	A5JYR2	A5JYR2	MTISYSDTFLKLLFRWKGSLWKAIWKHLLIFLTMYYIINAYYRFGMTKEQQNEFIKYVMLVDGWTKEIPLTFLLGFYVAMIVRRWWDCCQLISWPDHLLYNVSALIRGQDPETRIIRKTIARYTILTSVLAWRSISLRVLARYPTDDHLVDSGLMTKEEMVMFKSILVHVDPHQKWWVPLNWIQTMMVRCFEKGTLTHTNELRVLLDALEKYRNGFFQLFIYDWIAIPLVYTQVSTISVYGYFLFALIGRQYPSKNENEEIVDVYVPIFTILQFLFYVGWLKVGEDLMFPFGADDEDFEFNYILERNLEVSMLIVDELHNQVPPVYVESLDDEIRLLHTSASSKLSNHPQRQHLRKLKFNVDAMQVQAVPGNHLNERDVSVSTTSKLSFADLENLANGP…	405				flat	NA	NA								BWM						0		1	71	67	405	0.987654	16.5432	17.5309		0.0041		-14.995		9.42275	9.91894	3.27684	22.8101	13.1491	39.9067
3851	3913	WBGene00015061	cpna-2			B0228.4	Q09221	Q09221	MNDYEIRDLTGSSQKSNNQKISNNSGESAHFNGTSENVKTESDDDSTCSSSLNKLSNRHSEPMNHLSVGGFVAKDLLSSLTIPLPQTVIRTCQSIDIDTPDRSRNDKTLTSFFYSSCKNLLLTTIIPDPLDLVAAAVGQSTAQALLVAQIGWMVCVCCRCCLCKCIANGRGVRGQKKQIQEPTIADDDGRDLPYEVPGSIHIPKPVYNKKLSKSRSSSVPHVSVPSLVSSSADYKRLSMWETSLNVESDVEPLHTPPLVVGRKLDYIDKEGNNPSCCRERGTRKPGFRPLRGSGSPPPPDPSTSTKVAVTSASEVKKIKDHKKQLKKEKEKKKKMDKKQSSSGGGFFTRWFGGSGSNNSQQNLAEDVIDARSERKTAKQREQELLQRSERRSGGRTHSH…	1633				flat	NA	NA								BWM						11.5126		9	912	837	1633	4.59277	51.2554	55.8481		0.6395		-7.492		78.1184	95.0602	94.7973	2.12233	2.66274	2.86416
649	716	WBGene00015137	B0310.1			B0310.1	Q10937	Q10937	MRNSACLAKIHFNKIQDDNEAGIFRLDAKRSDLLNVLWAETITNGEDDWSELADQKLELYEKALLQHYGIDLDKSDKSFASGLQKSFAISTTIGPLDVDDFTTLGKLIAVLYALIGTPLFLTVIGQLGKMVTSVWQGTTLWIVTIVYIFISAVIYDIVEGGSDDVPFIEAIFSIFLQFTTVGEVDNEFHGVLPYCIVVLGLALITALYQEMQHNIERFIHPFEYSFNRLCGNVERWAGEKSEDKKSIVTSRIEEENEDEISDYE	264				flat	NA	NA								BWM						4.45205		0	30	0	264	11.3636	0	11.3636		0.0033		-27.89		14.8833	14.5173	4.28887	26.4309	31.1054	46.674
9061	9120	WBGene00015148	hpo-28			B0336.11	Q10956, H2KY79	Q10956	MVSDISNSRILRRRSSTFTDPTNLLAVHELRSRILQDPAISVKHLSDDVHRIRHEDWWLDRFLGSVNYDVDIAYAIMLECLKWRRNFEVDRISLLSLKPLLDNQLMYLHGKDLQNRHMLWIMMNKYKNGDDGFEKLFTFWIERHYMEYKGCQPLTVFIDMTGTGLKNMSFDAMKFIIHSSKYYYPNSIESILIFENPAILNASWKVIGSWLESSAASQRHDLLTFVTKLSVTHYVPKSHLLEHQGGTDTFKFTMDELAKCLPPPPPPKPSPKLLQQRMHSIDDSTNNNVTEFDFSSFQKRNVKFDEESTTKRAPSLSRRSSRGPKSRKSHIPPSLRPLIENRVNAPSDDWSSNDFVSITPRDELRLEKLDGENDLLDVVLVKNQSSDTPIMFKFKTTSP…	567				flat	NA	NA								BWM						13.933		2	146	123	567	4.05644	21.6931	25.7496		0.8508		-19.515		36.9197	59.1697	67.9686	54.1341	13.1491	55.4041
16662	16674	WBGene00015177	tmc-2			B0416.1	Q11069, A0A1N7SYT6, A0A1N7SYS6, A0A1N7SZ06	Q11069	MPKSGAHQPLVRHDTDDGGETGQSVKSLADVSEEEIDSRMSRRSSVIADLLSLFRRSSSVLVRPHTRLGNPNFDDDDDEFDEEDDKEASKDRILKKIQQKKEIIQKLRGQPWYMKRKRRTLKVAQKHLQQQEAKVSKARLYKAEAGRRLTQASRWLDNLKIYLIPWEAKIRKIESHFGSVVSSYFTFHRWVLGVNITITFIMCMFVVIPEWLADSRTQFGDDRYNKTKAIKVMPPAVRARADELSTVWDFGGYFQYSLLFYGFYSKETFFGETIKYRVPVAYFFCNIFILGFSLFIILRKMAANNRRGTLSSGKTQQYLFNWKAFTGWDYTIGNPETAGNVYMANVIKFREAINDDKQKPSDKHPWIRFVARVLTNLFICAMYVFSIWAIMQCGTLKGE…	1238				flat	NA	NA								BWM						16.4889		2	533	524	1238	0.726979	42.3263	43.0533		0.8483		-3.46		33.5937	86.1877	85.9224	6.73299	2.54483	11.7981
15277	15298	WBGene00015334	sup-18			C02C2.5	P34273	P34273	MKKHTHHKAYGDSTGKEPLIDLQSIKLWLNSFGNQGHSSEAVLNVLFTLGVILFVIYQVASLLHRMNKRVEKQLESRTKQRKVEVADKHVGDEMVFTDLHENVIRERMIPYRMPVINDDITLRNSQIFYEEMKMRRSCRQFSSRDVPLKVIQNLLKTAGTSPSVGNLQPWTFCVVSSDSIKTMIRKILEADERDNYVSRKKGASWVVDVSQLQDTWRRPYITDAPYLLIVCHEIFRDVHSKTERVFHYNQISTSIAVGILLAAIQNVGLSTVVTSPLNAGPDISRILRRPENESILLLLPLGYASEDVLVPDLKRKPVEHITKLY	325				flat	NA	NA								BWM						0		1	95	44	325	15.6923	13.5385	29.2308		0.0584		-19.474		24.4682	24.4461	39.9975	33.1344	19.0346	42.9305
16494	16512	WBGene00015356	tag-278			C02F12.7	Q11102	Q11102	MSERLRERLGILSEEFDGSLRSASPSGSRSPRRMSRSPRPHGTHEPAVGVTRPFVRQSHPEIAAWPAPPPAHQLGCLSGNVRTPVGGPAPPSPVLRRAPSGPISPSPISPVSQHSRASSRHDIDNTSLLSILKLSHVARESSRNTSRNNSPQPAGRETELKRKIQTLEETVAEYERQKYNVMGTFSEYRERVAERERKLEAEYSGKIIALSEEVLGAKKDFEARMKSFQALQDKFEREKEQALEKLRKEHQKEIQVLEQRFSDTQLLNLEQKYIIEIQRLEEERKSLRTEKERLGETFEMKLRRAQSLYETELTAAKMLYTKELEALRDHEEALKEELLARQDEFHDRLQELQLQSKRSREDLVSCKNDVTALEKKLHNKEKEVQTLTKELDQVKTETN…	1163				flat	NA	NA								BWM						13.8435		5	550	500	1163	4.29923	42.9923	47.2915		0.3231		-8.39		85.6153	95.0602	96.448	11.7932	88.843	7.05723
1062	1129	WBGene00015359	C02G6.1			C02G6.1	N.A.	Q95ZZ4						flat	NA	NA								BWM
1105	1172	WBGene00015407	C03H5.5			C03H5.5	O16656	O16656	MIVETKTNRLHQKIKKLKEDLAREKELRKEAERQLKVLLDKQTGSLEITKPENIGLFITPEPQTSRRPIKDNSAKPANSKTMSELPTPNEDTKATDIVLEYLAHFSKMIAENNLLEIQNCYYDRLETVQKQLPPSFTWPDEITVRKSISPENQDFMVLYKELKYRRLNAEARQNKDMLENYQSIFSILPGKLNLPDYWILDIMEEYVFQIQTSIISTESVSNKDAALNTLISLASQPEANLKTLSLLGLIRMHIFLQDHQSTSQILDQMPPEIQGTETMIRVTYQIGFAYLIIGRFAESVDRFLKVLSSSVEQAEKFKINALPCIAYCISNSSKELEIPSEISKHVESTYPNQMKDWKEAKIETFLSFFAECSSFIPQLPRNNKLSLHWKSQNLKSMVF…	552				flat	NA	NA								BWM						2.89855		1	93	91	552	0.362319	16.4855	16.8478		0.1293		-19.389		24.338	61.5279	62.3999	19.6807	31.9725	29.3908
1793	1860	WBGene00015954	C18B2.3			C18B2.3	Q18074	Q18074	MELLTSPSFHHISPLTRSRSDVRSAAMRRSNSFSGVTRSTSSNRFSRPEYGYGGGYMARSINKCGGSIFGRSLAASALTTTPPFHSVGVQRSTPHYTDKYPYVRYSYGNTDTGLGILTQSESVYGHHSGIRDIGTKRWLEGKLNAYNTSLFTRPDYQKRVERPLASARSYVRYMPVDDALDMYKKRCMTVGTLSKYWLSPATWASRREKELNLSSSLSRGNYSYSSRFDRLGGRVY	236				flat	NA	NA								BWM						6.77966		1	116	56	236	25.4237	23.7288	49.1525		0.9359		-5.943		76.082	64.0776	49.9312	92.3925	94.4387	59.7765
1823	1890	WBGene00015980	C18G1.1			C18G1.1	O61925	O61925	MIFINTRPVDENAQCERRPSKAPSHSGHSHPHDGTAHVLRLSLSLILFYLLVSIFPAILFYPVSLLSMLVPVLALFFALCSIRGDYQSTQWPILFIALIGILLKIAAIVVYISLFPLKDYSRKPGRGPQRTEAEMKHYRTVFYIILSTVEFFILIIGVCLKWQLVTLHQREQIQKRRSTLVSSRPLIEGEPGAGGPRRSLQQV	203				flat	NA	NA								BWM						30.5419		3	153	127	203	12.8079	62.5616	75.3695		0.0931		-25.547		30.6706	9.6733	16.0919	61.3854	45.1904	70.0639
2081	2147	WBGene00016210	C29F5.1			C29F5.1	Q18310	Q18310	MSADGFWLFEGLEEEPYGLLPLNNLSGKGGPTSTKYVDRIGSYQWYLNDETATILVPGAPVESFYWPGGKLMQDHGVIIYDVNHLKVREGSLDAIIIAARLLSEKKKKPIDFSQFHFITDAINLQKIFAFCNEAGEGLFRIDCERVGKTVLLTRMEASDLMEIGHVTFDQNLKHRMTRPRGAHSTGPFFQLVSYQYGQFRILVRYEVDCADYAAVKATPVPVDKSEVLPEKKKSDMNPDIEVVNYGEVPHDVPLQVLTTYPQGAGFPFFTWAQLFFTNANHELLGWFKGNGDFGKPAIYTLQDVSKMMKPLPLVSLCKVHDCLDKVYKFLTKNDDNFRCGLVWKGKAHLEIFAKHEEATGGISKGVRDFLATQCKDDEPEEQK	383				flat	NA	NA								BWM						4.69974		0	38	0	383	9.92167	0	9.92167		0.008		-17.059		29.6536	43.4169	29.2606	37.1064	39.6782	59.7765
9165	9224	WBGene00016266	idhg-2			C30F12.7	Q95YD8	Q95YD8	MFSKLPIQAVRGAASAIRTHQIPGHRLPLAKYGGRHTVCALPGDGIGPEMIAHIRNIFSFCHAPVNFEEVQVSSSLLDGDMDAAMLAIERNGVAIKGNIETKHDDPQFNSRNVELRTKLDLYANILHCVTIPTVPTRHSGIDIVLIRENTEGEYSGLEHEAVPGIVESIKIVTREKIERISRMAFEYAKANGRKKVTAVHKANIQKLGDGLFLKVVRDMSEDYKDIKFEAMIVDNASMQLVSKPQQFDVMVMPNLYGNIISNIACGLVGGPGLVSGMNLGDKYAVFETGTRNTGTSLAGKDIANPTAFIRASVDMLRYLGCHYHANIISDALWKALVEQRIHTADIGGNNSASDVINATLQNIKVLMDENPKH	373				flat	NA	NA								BWM						0		0	36	0	373	9.65147	0	9.65147		0.044		-8.706		19.6856	40.1646	5.52198	46.2073	26.2712	15.4311
2191	2257	WBGene00016330	C32E12.4			C32E12.4	Q95Q77	Q95Q77	MPRATSYDPFASTNRASSVIRSGGLSNSDYTPRISSYTSRYGSTDQLNSSSSSSYRPTSYRAGSITSGGNSSNSTSSYTPRNVRAGSVSIGAYDPPTSRADSVSSSSTFSRYRPDNSVSSTSTYTPSLSRYRSTDLSSTSDYSSTKYRSPDNSYSSRRSSTISSGNSNRYSNSHKTPSSVYSSRTSTSSSYRSDRDYRSMSRATDNEDEVDEIESTFRKLYRKYVTDSEPDLSKVGGKDDESLAEKVSRRFESKSEAEDDDDSIAEEDEDDVLSKYQTKGLRRASSASSITPRASVCNSPSKDVTPKCSPLPARKEIATVVRSESRSVSPEMKPLTRSFQMEASFGVSAIKKSSVEETKTFETEKSPEVQKATEPTEKIDNFQSTPVTAVPRGVPNLVD…	1496				flat	NA	NA								BWM						28.877		1	1440	1424	1496	1.06952	95.1872	96.2567		0.9555		5.145		96.8165	98.8922	98.0472	3.27192	10.2874	4.6082
2438	2504	WBGene00016531	C39D10.3			C39D10.3	Q18524, A4UVJ6	Q18524	MPKAIVQGLTPDGEKKKARVYTDGCFDFVHFANARLLWPAKQYGKKLIVGIHSDDELDNNGILPIFTDEERYRLISAIRWVDEAFEDAPFQPEMSTLNQLDCDIIAIPDISHLTTVETARYEEIRGSERAKQYVISEHVTDQEIAGRLMLVTKKHHMETDSILDFKSAILPFALDPLSNEPVISVSLFKQNYTFAPVVIGRKPKVTDKVVYVSGAFDLFHAGHLSFLEAAKDLGDYLIVGIVGDDDVNEEKGTIFPVMNLLERTLNISSLKIVDEVFVGVPAVTNSKFVNLIRASKIAVYSETHPRRFADCTYHRIIEEVTPDYDATCEEILERITSRKIASSDDDEIAMFNAVPLNNNQH	361				flat	NA	NA								BWM						0		0	45	0	213	21.1268	0	21.1268		0.0096		-28.68		14.0162	25.6988	6.95407	21.4665	15.7701	24.6622
3576	3638	WBGene00016626	clhm-1			C44B7.4	Q18593	Q18593	MTTSINSVVTVFQNVFTNHGSTLLNGILIATTVGGQSLVRKLTFSCPCAYPLNIYHSLVFMFGPTAALLLIGITVNSTTWKLAHGFFFRVRDTRHSWKTTCVSWIEVLIQSSVAPIAWLFVVFLDGGYYRCYRSHEFCLISDAILCKNSTILNSYASTSSFNKISDNGKYCPPCICVPNPTDASYLEAESQIYAWGLLLFSGVAAFLVITCNRMCDKYTLVQRQYVETYKNVETQKFDAVAKEHASQLAEHNARAFFGQKDWTKRDWDWVSGIPEVNNPLFARLRLIAAEKTQQTMYTPLQLWNDNKGYRIPQPDLQLTQIIVDETKED	329				flat	NA	NA								BWM						0		0	17	0	329	5.16717	0	5.16717		0.0164		-16.871		9.64382	11.8251	2.55711	23.4463	35.7775	31.857
191	259	WBGene00016716	acs-17			C46F4.2	Q18660	Q18660	MVDESDVKSALNGHDRPFTITLAIVLLKIVFFIYDVVTFIPFKIFADPAEKLEKSERVKAEPDNGDPTTPWKNVSAKDGLMNSSFEGIHDLGTQWEECVRRYGNQPCMGTREVLKVHKEKQSNGKIFEKWQMGDYHWRSYAQVDKRVNMIASGLTSLGQQEKEPIILFAETREEWMTTALACMKMNFPIATMYATLGDEAVQFAINEVGAKTIFTSEALISKVKKAMSNGATSIENIIFFDSVDPASRGESVDVDLPFTLLSFDQLLSRGEPYPVPTRSKKDDLAFIMYTSGTTGNPKGVMISHQNIVAVTAGQAFNIVLGPDDRYIGYLPLAHILEVCAEMVVFTKGVRIGYSSAQTLFDRAPKIMKGEHGDCWVLQPTLMACVPAVMDRIFKAVIDE…	718				flat	NA	NA			1.53682	1.33264	0.017426	0.00817329		BWM						1.81058		1	51	45	718	0.835655	6.26741	7.10306		0.2401		-15.735		12.2525	36.6863	33.7951	10.7738	15.7701	11.9602
2621	2687	WBGene00016722	C46G7.2			C46G7.2	O02141	O02141	MSTIAAGRFAKDDVDQDTKWWKEYPSKHYIERARPQNYYDEFVQNAWSKSKRLARAASFTNLTYIKDKDMDFPIRKSDSVSTLAPSLALPQYCREAQRIVHTVPVYKPTVHDWYNKSYSDARWRDTHREINKPYKPLDTYISPASSHVPYYSFQTKRIFFDEKARQLAPYLKESQRYMDRYVSSRLKADDYANRFAYTAYEWRKPQDHSFNREFMTTQGVFVATPTGIPHQHYDKFGMRRLYKRTGRFFF	250				flat	NA	NA								BWM						0		0	20	0	250	8	0	8		0.0241		-14.608		37.7377	66.4456	6.0452	56.5291	38.6441	77.6026
2788	2854	WBGene00016846	C50F7.6			C50F7.6	Q18750, W6RXR9	Q18750	MASFTSPDIDEKLAILHREMASLRVECDRLLNKHLIVEHTLSQSCSGWPNGAADTSSAYNTGGESCRSVSVTPDGVFIPTTSNSQMIQSQPSPRVLRRTVKMASPAVQRRLVPQNLPTSSSSRPPTVLLPHDSPEQPSRPIHRMHQELPIPEDVVSMVSSNKTQRSIIRAPSAVFGALKGSSLRKLSISRNIQMTTKVNKEESDRKEKEAEEYAKRFRIPSYSVVLKEEKRKSSFRIPVPHYFRSSKAKSKVYQVDAPDEEIEEVIDEEKMAAKTDLGDTTVHYKWKVKRRCDGSRYIVKRPIRSQILKKREAQVYRERAPISTDDDAMSELKLGRYHTKEERKRILERENTKKMLKLQQKMMEKAHPSEQVIYQMSQQKLARQKDAMVMDEFVTTREV…	418				flat	NA	NA								BWM						9.09091		2	379	325	418	12.9187	77.7512	90.6699		0.0163		-8.093		74.0064	65.3844	75.2935	37.1064	21.4468	47.8482
3015	3081	WBGene00016987	CC8.2			CC8.2	H2KZH6, Q966L7	Q966L7	MKTKVLFYRPASTGPLWVPSDDDEEEDVLPALRCTRSKTLPSALRRSRSKQSVKRVRFADSLGLDLENLQYFVKEDLHLQKFNIHFSTPSSSTPPPQLPHFPKQLINQPAPRLVLHNFPYRSEQEYQVKTRDSRVCVAALRASGSSIVGQVNLLNVAFDKVVVVRYTIDGWATQDEIVASYSHRLFDTEDIDAFNFTIAIPVKLSEGKCEFCVQYQVAGAEFWDNNGGDNYIVNVSTKGPSSPFTRCYGASTGLPDAPRGSTRRQQQRRWGRALEESDEETPYVSSAPRRGAHFH	295				flat	NA	NA								BWM						7.79661		2	141	132	318	2.83019	41.5094	44.3396		0.8277		-6.989		71.5868	67.5215	46.0599	73.4169	49.8624	70.0639
4225	4287	WBGene00017060	D2063.1			D2063.1	Q9UAT1	Q9UAT1	MVSSDVPKTQRALIFESYGGPLEIKQLPIPQPNEDELLVKMEYSGICHSDVHTWLGDFHYVSKCPMIGGHEGAGSVISVGSKVKNWQIGDKVGIKLVQGNCLNCEYCQTGHEPLCPHVWNIGVQKYGTFQEYATIRDVDAIKIPKSMNMAAAAPVLCGGVTAYKALKESEVKSGQIVAVTGAGGGLGSFAIQYARAMGMRVVAIDHPSKEAHCKSLGAEWFVDAFGTEDIVAHIREITDGGAHGVVNFAAAKVPMEKALEYVRKRGTVVFVGLAKDSKILVDTIPLIFNAVKIKGSIVGSRLDVNEAMDFVARGAVNVPLELVKLEDVAEVYTKMHDGKINSRVVVDFSL	350				flat	NA	NA								BWM						0		0	5	0	350	1.42857	0	1.42857		0.1905		-17.956		29.3491	22.0437	19.7494	41.4616	48.703	20.6264
5345	5407	WBGene00017428	F13D11.3			F13D11.3	Q19388	Q19388	MSNQNKALLSITQVRPHLFLAGYGCITPSLLKQYNITHGVDCTNLKTKPIKGLDRIEVPVDDNTLAKITQYFEPVVKYIEDAKQQGHNTVIYCAAGVSRSATLTIVYLMVTENLSLEEAYLQVNQVRPIISPNIGFWRQMIDFEKQRNGNASVELISGRMARPVPSVYLRRVVC	174				flat	NA	NA								BWM						0		0	7	0	174	4.02299	0	4.02299		0.0758		-18.879		40.2899	28.0619	15.2395	61.3854	55.9445	56.1066
17169	17179	WBGene00017440	upb-1			F13H8.7	Q19437	Q19437	MSAAPAQFDGVETALAEKLDGVSLDEVERILYGRPYRALEISSIAEKLAQDGDFQLSGYIVDAQKEQTRAPRLVRVAAIQNKIHRPTTDSVVEQRDAIHQRVGAMIEAAASAGANVIGLQEAWTMPFAFCTRERLPWTEFAESVYTGPTTQFLSKLAVKHDIVIISPILERDEEKDDVIWNTAVVISHTGRVIGRSRKNHIPRVGDFNESTYYMESTLGHPVFETKYGRIGINICYGRHHPQNWMMYALNGAEIIFNPSATVGALSEPLWGIEARNAAIANHVFTVGINRVGTEVFPNEFTSGNGQPAHKDFGHFYGSSYIAAPDGSRTPALSRVREGVLIAELDLNLCRQCKDAWGFRMTNRLDMYAQKITEVSNPDYRPDIRREQ	387				flat	NA	NA								BWM						2.84238		0	10	0	387	2.58398	0	2.58398		0.0108		-10.845		24.1169	46.9909	3.65512	41.4616	53.4095	23.5225
5675	5736	WBGene00017639	F20D6.10			F20D6.10	Q19654	Q19654	MTERLGSVNPTKPINVAEAAQLAVRQKNFNRTCCNMCHIKLGAAFLGVIEAIIAVSVLIGAVQQVLWKNQHSSSCAKNIFRDCLIFQFNHFNVTLIFDYVVILMMVLILFSVLCLFCGVASDTSCLILPHIVVQAVFLLFSVGYFVLYAFSYFYGDLIVHHRSFMIQSMFERMWLASLLLVLAALQSYLFSSVIRCSLYLADIEDNRRRRESAFERCSERVRIAKENGLWRTTSWGGGFQQYKGQYDHPKKEVKNKGFHVQWNTDVEAGKRESVKKDTVELARIESLETPPLSPIPEDEIKEPSPSKTNQKLNRSNSRSEERRGSTNSTVSHRVNRGLSETPKKEKQPRSVKKTASEGTSRIEDDLRRMSSTKEHHHKEHIHHAESKDSPNMPKRYAKL…	486				flat	NA	NA								BWM						11.1111		1	286	256	486	6.17284	52.6749	58.8477		0.1788		-21.273		50.0909	36.6863	57.5633	33.1344	29.3712	43.5077
5711	5772	WBGene00017657	F21C10.7			F21C10.7	Q19663	Q19663	MAPGGAPNDANLSAVAQRGHSEEGDKSTTTLSTIAVKAGVNASIVVALLKSAGYIQLRVDEMQPKLLSIGNSSQEARDLLNIHDDLIRRLQDKDDQVVALLSRADSLGAEKTNPNEAIVYDEMAKSLRETWRSLNRQLLLRGYMLRETVQFYTLAESHEKLSNAKTIEIVQQINEQNSQQLQSSIDKLINDIIDTTASVVDLGSSVISQIRTLGQLDDNPERPQEILDASVKIESVMLRVAADWERSEGLWQQRKSGATQQNATTTTEDELVVIEQWLTYAEKKVKALNDAGQKNVLTEGNKHVSRLRHLAQSPSSDGGRISHLSGRIEEFLHYLKTRMNRSHRIHAFLQAAKSMVSQLNMMVEDMKCANAAMAGELAPLAKQKASPLIHEGKDIASKE…	2588				flat	NA	NA								BWM						7.14838		7	969	862	2588	4.13447	33.3076	37.442		0.8936		-7.195		9.2508	96.3424	97.3299	0.294768	0.309506	0.476541
15045	15068	WBGene00017866	stn-2			F27D9.8	Q5WRR6	Q5WRR6	MSVTKSHHNLDVVHHGIVLISDGNATSRSSRLLLSKDELCIQVIDDGTAEPEEAKETFLENATRQVVIVKKPDSGFGLSIKGGSENAQNMPIVISKIFKGLPADECGELFIGDAIVEVNGISIEGQSHDEVVNMLKSSGDQVTLGVRHFTHMTPFLKPAQSLQPDGTLDQLFDGRSTRSHKAQSESRLSDSKWQQHIDGREKKWKTLTSLPLAMAYVTRYLWGTDNIRTNSFEVRAVDGRSSGIVHCEDTSALEQWISHISKHILSLNQKSIKMSNKYLHQSEQISYIGWVNEYLNDDDQEELKIRWQPRFLILKGSDVCFFDVPPLNSEDLNKCVYLYKCYDVAVKQVPNSSPRRDKRDNCFLIETPLQVPNHYLSFEAVSAFELFEQAYYRTVYNTI…	515				flat	NA	NA								BWM						0		1	60	40	515	3.8835	7.76699	11.6505		0.0318		-15.819		26.3572	49.9312	43.1516	34.6475	14.844	28.8873
6240	6301	WBGene00018024	F35A5.1			F35A5.1	Q20007	Q20007	MSRAPPTPIKNPAKKWKPPWESVDEEEEMEVDEETPAPSKLEKKPSLKRKDAPTKPVPSPGAPSPVPIKNPVKKWKAPWEDDEPMEEAPAAPVPAKKVRDPSPKKVPAKPRDASPKKIMAAKKEPETLPAVPPTPVKNPVKKFKAPWEDDEVDVEDVKDAPTVPAKKTPVLKKKEPAAAAKPRDPSPKKAAPSKEHDPIVPPTPIKNPAKKWKPPWEDDEVPTEEIKEPEPATRKVPALKKKEPSTSVKPVSDPSPTKKVPVKKEPEVPPTPIKNPTKKWKPPWEDETPVEEVKEPPVPEKKAPVLKKKDPAPAAKARDPSPSKAAPKKVEPSSPVVPPTPVKNPVKKYKPPWEVDDEPAEEVKKPSAPEKKTPVLKRKEPEPSSTTPSSDPSPKKAAP…	2311				flat	NA	NA								BWM						57.2479		1	2108	2107	2311	0.0432713	91.1727	91.2159		0.996		-17.204		99.8281	99.9312	99.7642	0.15721	1.03169	100
6250	6311	WBGene00018033	F35B3.7			F35B3.7	Q966J7	Q966J7	MQTLRNPLSIFRARSRSRERSTPQRAVTQSEKSDKSRNKNESTNEKKSITVSSSDVSSKTQLTKPNNEPKSKATPDKATTQKLFMKRDKNATECLAETKIERKSICREKTHKSIVLPQPRFYTCERIQKTVKLPDKSKSSSAMSIKKSTHWCYVAAPKHITLQPGPSSVGDGFSTEAMIEEIFAPLRDTIKEGIEEARHLSSSPEKIKINHTPSTRLEQWKAQLNSTTPRIRDSSAPATVQRLTIKPQTTQLNIPRPVHSTQSASNALTTMDHRTLRDVSSRRRSGTWQPFSSNTYNADRPPIDFVTSTRYSHQEATIFRPIAHRPKPDFINHNDSNRRSFRRVDSILHSELKDSNGSLSDLLMMYQAKDTPREMNASIRSTASNSSSFPYFSPEQINQ…	578				flat	NA	NA								BWM						7.09343		1	456	428	578	4.84429	74.0484	78.8927		0.9029		-5.408		84.79	88.7865	82.2894	60.1793	32.8764	34.4264
6299	6360	WBGene00018056	F35F10.6			F35F10.6	Q9GYU1	Q9GYU1	MMEDDAEGEIGDMLSMCNRQPFLMSLYSIFTVIDEPVEGKQPSSAVFVYEELAKFGDFCKLFKMEESYINVDQVVQEIANIQSRYAIHLSSHSLKNTIQIVRTAFPNGYTQNDKNGNVPEGNKVKFDGDETVMKTTVDCEQLVKDIKEFMEEDRQKYGELEIQIIEESERNLDGYAYFSFLKFVPCGTIHLRIPPLKESCTKEVINKVIERIMRSFWKYC	220				flat	NA	NA								BWM						0		0	14	0	220	6.36364	0	6.36364		0.0063		-10.577		27.8629	22.0437	17.9317	42.3409	27.8261	54.6966
6505	6566	WBGene00018221	F40A3.6			F40A3.6	O16266	O16266	MSEYLGWHNRKPAAGSRGNSSFDRDIVPGGAHTKSYESYVKNIFHPTNRLRAKDKDQLVRDHGLSATSMLRAEREFGRSALDDKYDREHFFEKMPLESLYAELGLKNPAASNYRSFQVYEPKSSSEYFAASYEAERERRKKDLERELASYDKEDYEDFTGEPKKNLYSSISSYRPPLSSYKSREDEEYEKNNRKTLIDYKDFDSSPLSPYLYQSHPYVRSQDSRIIGSNFVQLTSRPKDKFISKIEETLAMVRDMPRY	258				flat	NA	NA								BWM						16.2791		1	65	31	258	13.1783	12.0155	25.1938		0.2297		-20.193		61.4763	75.3893	51.7416	68.3911	54.7015	73.5986
6719	6780	WBGene00018407	F44B9.2			F44B9.2	P34423	P34423	MADDEDDIVWIREDTAQSSVPTSPTTPATIIEAAPVLSDAFDKPILKSVETISVSNGPPEVTISAPPPTPPAAPLAPQITPMVLSTVPDAAPAQDIPALILAALAPEPVPEPEPEVEAKQNVIVEKENEIKDQQQNDQLSAKLDPKTPNSVDDNSMSFDISECERKFNTAIREANDILEDFDKKSKQVAENTKFVAKELAELAADAPRVFQKTIEDHSQVPEISELPSGGLPKNVESVLIGEGILEEITGTLVLPTGQVLVTDERVGILLFNLEGDVLAKINPADFRKLWSPVYHKEHILVLADAKNAENHWSRHVIKFTCQLEYVAKIECPSWLAECTILRERLSIAHNDHLYLCVCGEIFSGIYELTPIGQWTELEYKLSEAYIDMLAFATIGPITQ…	503				flat	NA	NA								BWM						15.507		1	182	145	503	7.35586	28.827	36.1829		0.0088		-19.548		14.171	64.0776	36.6372	9.04937	10.2874	15.2149
6834	6895	WBGene00018485	F46C8.3			F46C8.3	Q9GYP5	Q9GYP5	MGSGQSMNHSPGDMMDHHQYPDMNMIFKGIPKMIQVADDMHRMTDYIMDLRNLTIAVLAISVFGLICFMILKIVHNKSSRRKRRSIQRQIEEGYPPAAPRYYYSSQYAPEPWDRPKHTYSPSIEEKKQLECRNSSPEFKGNGSVNYKPYTNESTEMSPENEKKTSLSNDMSHRGATTASVPKRSLDPVKLVVGDLPYVDSS	201				flat	NA	NA								BWM						14.9254		1	194	150	201	21.8905	74.6269	96.5174		0.7178		-12.795		66.1656	52.8519	36.6372	69.6536	49.8624	85.1437
190	258	WBGene00018579	acs-16			F47G6.2	Q9TZI7	Q9TZI7	MSEFFQQTFCIDYNGWVTGVSKAPPPKQIDFDSQTIPQLIYTKSEMDRVAAVFDSEKLSLTFSKIVSEMESLAAGFLSIGLKQGDRVLVAGSNHSQVMLCALACSRAGLVFSLANPNYPNSYSLKRALELGEFQCIVCFRAHQYEADHLNNLLLEIAPELMRSRKGQLKSELLPKLTHVILAEEDHKHAGTFTLSEVFLKSSKEKIAKLPDFSKWSSHKLACLQFTLGTTGAPKLIALSHYQMLNGARAVAAAFGINDKHVLACALPIFRIAIFNLICLSPFLTECRIIFPDATPLPKNLFSSVSKYRCTTLLSNGAALRLLLKISQTQRVKLSALENILLIGDRVSKEVLKLIKVQAENVKIIAVGYLLTETGSIPLMGDQNSDFTRNVGKAIAGYEA…	569				flat	NA	NA								BWM						2.10896		0	7	0	569	1.23023	0	1.23023		0.0165		-17.793		12.2525	15.0454	27.2144	15.0454	38.6441	17.6394
12059	12103	WBGene00018701	pccb-1			F52E4.1	Q20676, Q8WQF1	Q20676	MLSRFARQLALPVFNGVLHPTRATSSIAHTIKVAHKIDETREKALLGGGKKRVDAQHARGKLTARERIDLLLDRNTFREYDMFAEHTCNDFGMQKEKYPGDSVVTGRGEINGRTVFVFSQDFTVFGGSLSSIHAKKIVKIMREAMLVGAPVIGLNDSGGARIQEGVESLAGYADIFQENVMASGVVPQISMIMGPCAGGAVYSPALTDFTFMVRDTSYLFITGPDVVKAVTNEEVTQEELGGAKTHTVTSGVAHGAFDNDVDALMSLRELFNYLPLSNTDAAPIRAAEDPWDRAVPSLDTVVPLESTAAYNMKDVVHALVDEGDFFEIMPDYAKNLVIGFARMNGRTVGIVGNNPKFAAGCLDINSSVKGARFVRFCDAFNIPIITLVDVPGFLPGTAQ…	536				flat	NA	NA								BWM						0		0	31	0	536	5.78358	0	5.78358		0.0052		-14.274		13.2081	39.0248	1.22083	19.1059	24.1268	12.1322
7153	7214	WBGene00018763	F53F10.1			F53F10.1	O01580	O01580	MADSIASIGNRYIDNNDTDMHFLRTWAVRRCQHTDWDICERIRLGELKEARDRAAQMEKTMRWWSSCTADWRNRWSAVRDERNRAREEAETLRLNYDLLLEEKRFLAEQLYHVDSESDEPKLEISQKPEIDGTKRNAVVQTIHSISCDPPSILVKSYSAAQIEAVLREPSVDEPPVETTKSDINEELKAENEFLKDQANELNKCREKIETDGKTIQDLRLRIQSMERELMAAKNSKRASSS	241				flat	NA	NA								BWM						6.22407		1	241	241	241	0	100	100		0.0069		-32.467		36.9197	61.5279	35.7013	52.9452	49.8624	43.5077
13538	13565	WBGene00019277	sgcb-1			K01A2.1	Q9TZ49	Q9TZ49	MDSDDEQITDENVGNSIGDEVTGLRAKRLIATLICLFVLFIISLITLALNIWIISTLRMNSNGVPFLRFYYSFNEKTKEMEKTVEMTGNQLKFEKVVSNKIVGFPDKDITITAPRMLVTSRQNDSLLVMSEKLCKLERVNNFQVLSPKDGRTLFSARHPTVTIDKRIKKLAAERIITNKIRSAVDETLKINGENVVLRGNEQVRIDARNVNFEGLKRMVFNISRDGILHMRGRVRLGDGAASLPMSTSPSLSASLDGMRLCACAQFNHKLFIVPANKHCFTSNTFCS	287				flat	NA	NA								BWM						4.52962		0	27	0	287	9.40767	0	9.40767		0.0069		-19.083		26.9148	36.6863	22.4662	60.1793	28.5876	37.0818
10949	11007	WBGene00019282	mps-2			K01A2.8	Q56VR9, Q86S20, Q9TZ55	Q56VR9	MPDRRLAIVSFHSLFIYSSFDKMSETKKNVLLSLHSLSSLIHVAMFYFLLVQWSKADNPVLTHFQIFCLVIIGIGFLIILILIFSIFKSEMKSDSHARRFFHIWPLVHIALSTAYQLFTQIVISHWKTYQIPILYSSYATTVSVCIHLVLHSMAVFWKV	159				flat	NA	NA								BWM						20.1258		0	11	0	159	6.91824	0	6.91824		0.0024		-26.644		14.0162	4.14394	3.65512	35.3918	37.6345	62.7733
9677	9736	WBGene00019497	K07E8.6			K07E8.6	H2L0F2	H2L0F2	MAPNNQNTKSNKKKAQKEPSAQELWETFPEALRRAIQENSMTQFDEAVKNVFTETPEILRKQCIQAGFLNEGTGNFSTLEDIKSQDMLSHFETNSALLEQLSELQGSTEPFLTEHPHMAAEHTVNWLTIAALSSAIDKNEEKLAALSEKCVVFQLFLASATGQKQFFKKFEVSENLDEVKAFKSRMRSRAQAKGEKPEKINLNQGTVDSRQFLEELKQLENLKKTEFAVQNYNKLVIRGDRMVKEFLIENPELLTEEAIKYLRILADTYSKDLNAKKCTDVSKKLTYILHFLTKKMTVAEYFVDLLAADSVKEYNDIWLVELRKMKQMMVDYKKARNPE	339				flat	NA	NA								BWM						4.12979		1	89	56	339	9.73451	16.5192	26.2537		0.0181		-25.087		30.8696	71.6384	33.7951	23.4463	82.6333	37.0818
19777	19784	WBGene00019727	zig-12			M02D8.1	Q21465	Q21465	MAPPSIYGEPKIRSENGSVFLEVIVTGADVSKIQWFFGPDELEENEFLKFSNSDEGGNRTKFVAEIKDFDKPLAGEYKAVFANADGENSSNFTVAAGNAPDFHDKPHIVQRDNGNVIVIKVRAKSHLEMKAEWFKDEKPVKFTDRVKAVVKKDDKDKDGFQFLLEITGPQKDDEAKYKCVVKNSEGQNQQALNLVFD	197				flat	NA	NA								BWM						7.61421		0	3	0	197	1.52284	0	1.52284		0.0377		-20.087		47.3692	59.1697	19.7494	37.1064	53.4095	71.7612
12841	12869	WBGene00020012	R11G1.6			R11G1.6	Q7Z1P8, H2KYE1, Q8MPZ6, Q7Z1P9	H2KYE1	MLSGERFESLLKSPKHHAKQFQEKVLNAYNYAIQLYTDAIESETFATYGQLILPLAVLVSVVLTILLCSVIWKILYYTSFLQVLGWLFGEMLWVILSWGLVAVLCYFALNHLGSTGEAAHTSSTFGSSVSGNGVANGGTHTSSGEWSNEIVSWLYSNFHKVPAPMDAWIKSLNEAAKKVTSPTKCEVLFEGFGDHSDVLQPPKISNVRVEHGPRDHLTVRSNVHLPCVKLRLVSSQRTPERMIVSNYDVSIVDLRGEVECRMACIANQLYLMGCFSGRPEMDIELRNTDPNAQYQVSIPMVEESIRRCLLSAVTNINLSEEMPEERNTFADTFSRTIYNPPTHSPSGTMRNSYNNYDTNLHVDAYGTQSSHRSNSPSGDVPEMFKKLNESHLISPSYNT…	899				flat	NA	NA								BWM						4.00445		2	333	282	899	5.67297	31.3682	37.0412		0.5094		-2.118		70.2407	77.3274	76.6495	42.3409	12.0216	24.2741
15463	15483	WBGene00020200	T04A6.1			T04A6.1	Q8MPY3, Q8MPY2	Q8MPY3	MTFCKSESFRFLQSARILVISYCLVGIILDIYFKYTPDLPWTHLITGTSPSLELIVIGALLMNSSTGNNIAYYVCTVDVIIGILCLLTLPVISVAENATGHHLRLPFVSTFHSSFKFQVTSTLDVFYITIFLGFVSTLLILLFLGLDMLKFMLLRKICRHDQLVAEKLVQQAERV	175				flat	NA	NA								BWM						0		0	16	0	175	9.14286	0	9.14286		0.0174		-24.045		16.7428	5.71358	10.4274	48.3026	36.7109	54.6966
11252	11301	WBGene00020230	nep-2			T05A8.4	O44857	O44857	MRPDEEDGTTKSPGSRWTRIWAIIALILLILFLLVLGAAIYFYINYKDSSDVCLSPGCIKTASVILSSMNSSVDPCDDFYEFACGQWIKGHPIPDDAPSVSNFENLGQDLEFALKELLDENDEPYDYETSAVGKAKYFYNLCLNESEILDNWRTTFDEVVKSFGGWPSLGHQMKPDASIEMLYADMVAKFKADSLFKATVQPDDKNSQRHVLLIDQPQLNLFARDFYVAAENEERMAYLQLIRDVLILLDADRTRATLDAKEIIDFETALANITMADEHRHDIAELYTKITLGEMRRSLPHFNWPLFFNRMFKDLHEKNGKRITFDDNTEVVVYGYEFLRRLDVLIPQYDNRLIVNYLEWCWFFKTMLRDLPDPFALTIFKFYKTLNIMNVQKVRWHGC…	736				flat	NA	NA								BWM						2.85326		1	44	44	736	0	5.97826	5.97826		0.0715		-12.318		7.55343	76.2122	7.33972	15.4311	6.53402	17.6394
15675	15695	WBGene00020331	T07H6.4											flat	NA	NA								BWM
15734	15754	WBGene00020382	T09B4.8			T09B4.8	O02158	O02158	MQRVQALRPLLPKGHVTYYKDQLLITKGEKQFLFDSNGKKYLDFFGGIVTVSVGHCHPKINAALTEQAQKLWHTTSIYHTEPIYEYAEKLLSKFPSKLNSVFFVNSGSEANDLALALARNYTGRFDVISMRNGYHGMTQTVLGATNLGNWKPVFPHGFNIFKSLNADPYRGIFGGSNCRDSPIQVKNRKCDCKPGSCQASDKYIEQFDDMLLHDFSHSSGPAAFLIESIQGVGGTVQYPHGYLKKSYESVQKRGGLAIADEVQTGFGRLGSHFWGFESQDALPDMVTMAKGIGNGFPLGAVVTSKEIADSFNKSLYFNTYGGNPLASVVGKAVLEVIEEEKLQENSAVVGDYFLKQLAAIDDATIGDVRGKGLMIGVELIDEQGKPLAAAKTAAIFEDT…	444				flat	NA	NA								BWM						0		0	7	0	444	1.57658	0	1.57658		0.6394		-6.892		40.5183	39.0248	35.7013	52.9452	64.0334	23.9204
16156	16174	WBGene00020732	T23E7.2			T23E7.2	H2KZS4, H2KZS5, Q8MXJ1, H2KZS3, H2KZS2, L8E6J9	H2KZS2	MSEVDAQEEFHDAPEEAVIEIQKDFVAEIEQDNSNAQLVEEGDDQLVTAEADDEKSAQQVDEDRTEDQVPDITGTEYVDPMTTSMDGIEDLPANDEAQFEDTILEEDELPDQLESAENQEPRSELVSSGVEEEIIEEEDIEEIEESDYVEESAPADEPAPEEEKPQEEAPAEEPAPAEEAPQEEVPAEEPVAEETAPAEEAAVEEPVVEEAAPVEEAPEAEETAPAEEPLIEVAVEEAPAEEPVAEEAEPEAEKQEFELQAPPEGKRPRTPNDLDNPTADEEPAAELEADAGSEVPPTPKTAASEKQSVPPTPKSAAPSEVPPTPKSAAPSEVPPTPKSAAPSEVPLTPKSAAQSSVPPTPKSAVPSEAPPTPRSAAPSDVPPTPKSNGHIANGSIPGT…	988				flat	NA	NA								BWM						33.0972		0	8	0	118	6.77966	0	6.77966		0.9691		-5.366		97.4257	98.8995	93.2081	15.0454	62.5817	37.6738
3578	3640	WBGene00020808	clik-1			T25F10.6	Q23050, H2L0M6	Q23050	MSDVEDEYEDEEEIEEDEPVADENQEPEAEEPEAEEEAPAPAAASPRAAAPPASLKSPTPGRQQVNFTPSIPQSVLRKQQNYSSGKPSTIHTKEKLMRSEGIIPIQAGSNKYASQKGMTGFGVPRDVIDKVKSDNLAEITDEKKIANLKGSTWLQSGTNKFASQKGQSGFGAVRDVNYKTKGTGGASEVPEEKARASDGIVPLQSGTNKLASQAGMTGIGMPRIVDVRRTNDQDRDSQGFIHLQMGTNKFANQAGMTGFGMPRHNITKYKDEVRGDMPHDEGTLSRQTSGWKEGASQAGMTGFGAFRNNTVAFMQAQDQRSQGMIPYQMGVNFLESQAGKTGFGQPRQVYTPFTDDTHEDLPADIARRPDVPFWTGQKEADHANQTGMTAFGTPRDVRG…	406				flat	NA	NA								BWM						12.069		1	101	97	406	0.985222	23.8916	24.8768		0.1482		5.795		89.7249	85.8094	61.9234	84.1439	91.5942	58.9929
16388	16406	WBGene00020884	T28B4.1			T28B4.1	Q6A590, H2KZV2, H2KZV3	Q6A590	MTAIYDMTRRVTMHDVNSEPDYDDMDPDMKDFFTDSNQQYYTERNQYTIEKLPDKVLRDIFQYLSPKQINQVGLVCKRWRVTSQNPLLWKFVSFRPNYGGIQVNPQCIDHFIQLIGTRFSELRIVELATDLITPNVLYELANKAPKLQYLTLDFSTAMQLHDFTDLQSFPSRLKSLTLCLSENIFLEGFLRKVYTFISSVETLHIIGTYEKVEDEEEEVYETVNVFKLKQFLPNLRVVNLWGVPFITDEHVDAISSNCAHLECLCVNYCPKVTGSCLKLVLQRCRKLKTLFLAHTKLDNNIVKMVDWEKTRIEELDIKGTELNSDALISILTRLPHLRWLDASWLECMTDQVLEAWQNSNAMGSLQFLNMDTCDSINEQALVDMIKRHGHQFHGLCLGG…	535				flat	NA	NA								BWM						3.0888		1	44	44	535	0	8.2243	8.2243		0.0045		-14.94		10.113	12.2402	25.3918	50.4888	9.19921	34.9619
4339	4401	WBGene00020897	del-10			T28D9.7	Q10025	Q10025	MVRMAERLAENFIPEANQRNENEPAYSRYKRVGQNRSRLNSRASLGSSMGRRITLIETDSGVIEVESDKQFLDAFKDANMDAVHHLNAASPVTRGLWCMIIIAFVILVLVQCYSQIKLYISEPVATNIEAEYPSKISFPTVAICNNNQFRLTYLTGGRIMNRRSKSISGSLLSTGHDVESVFDTVLRKSWDMDAVKFLRSAAHWKSRMILGCTWPNGTSCKLSDFKAVWTTTGLCWAINTDPHNPYEVTGSGEGHGLRLLLNVESYERVDACTKHFRTKTLPGLKILIYNQTDIPDSSMNGVNVPSGYSMDIPFKMQHRSKLTGVHCIEENDEQIEASTDFNNPENIRTCTLRRYMTEVENSCHCTLRRAYTSNSTDVKMKACNVDQYFGCAQKAMQRI…	1069				flat	NA	NA								BWM						7.0159		2	277	277	1069	0	25.9121	25.9121		0.1023		-1.472		34.1464	89.86	67.1457	18.5483	5.8536	15.2149
17468	17476	WBGene00021036	W05F2.4			W05F2.4	G4SFA7, Q1XFX9, G4SFA4, G4SFA6, G4SF97	G4SF97	MSIYQKRWSSVGSGASPSASISRSTPTATNVLSSGVEPSTVGTSWNSVRWNKPSTSYRANLASRFENNSTANSNSSYTPQRTSRFLSSAAKNAADLASIGPSVSSRASRFDTTNMANKEKYRNEARDLINKWSSRERNSNISNTYRSPAPRSTFRSTDSLATSGTSGAGSTGYSNTAYRTSTSLTPTRPVLPSSSTASRYSTERPSLLSPSPTPTLHTTPKADRPWRQRMAESSRIRSTLGDDYRSRQSSVESSVFSPTSRFTSASSYVPYSYRNRSDDPPASTTRTSVLDRSTSRSKSPTRDSLPSRTPSQAPKNPSIRESSKERDADKQKKKSAKERTARRNSRQNSQQDSSSDEEINRLMRSRSGSQVRRKPRKKSQVETEKLIVVEQKDTVMNRS…	1948				flat	NA	NA								BWM						25.6674		1	1948	1948	1948	0	100	100		0.9403		28.263		99.2483	99.72	98.8209	10.4888	38.6441	6.52174
10063	10122	WBGene00021948	kvs-5			Y55F3C.3	U4PE60, U4PR20, U4PBB7, U4PAX5, A5A8P9, Q95XV8, U4PLR3	U4PLR3	MIQQIASGSTSMAACERENSVDNQPDRASIDDRSSNKNYDEDVESRMIPVDRPSHKGSIRDNTPDSILRLNIGGSSYRIRTRSIIKFGPKTLLGRFVRMNHEHRRQWADWYFEEQDEYFFERVPRYFDPIYDFYATGKLHVPKDLCFDKFMAELRFWAVSKSRMDECCSPFTQYCVTMGGDPKCTEKDHFIGVRCANIRRRLWLILEGHSQSKWWKAFEIISTAFVVLSISALILGSIPEFQVPQKSEDGQLVYATATYPTYPNGGGMTIESRTVVREGSDNSTGDLMAEETVPTPRNTGKIEMTEHPVFTWVENVCVIYFSIEYAMRFIVAPRKLAFARQILNVIDLLSIAPFYFELLLWICGISGENVRKVRWAFLTVRLLRVLRVIRIAKLGRFSP…	521				flat	NA	NA								BWM						4.03071		2	121	94	521	5.18234	18.0422	23.2246		0.0086		-16.241		13.6404	8.16753	4.28887	19.6807	7.11373	21.1963
19572	19579	WBGene00022397	Y97E10AR.2			Y97E10AR.2	Q7KX02, H2L030	H2L030	MRPRKLRHRPSDELIDIRERGLPWLFSVFVVLFLLLTILLFYFIFTTRDVYLSQKQALEEEDIKKKEVAAHTKQESEEDDETWKEHTRRKGKGKSAEEKVHVDIVPIMSRKTGEPDKPSLLDSSINATLVVPPNSTIIIDTETTTTFTTTTEKPTTIPSTTTSSTTTTTTTTTTEEPTTTTSPIATTTTSTSTTTTETPTTSEATTHEPTASTELPPPDAPNDYIDSEEAQNISASQESGETTDVLLELEDDNIEDVQVEEYEETTKSPTVSTSTSEPMAAAPITDAPKTENVSRNYTRIIWDRRTVRSSSEKFSKFAIISHHEDCSEIGKKIHETGGNAVDAMVATEFCISAVHPHTTGPGFGAVIVLHSKKKNGTFVIDGRERAPKNANKNTFVINP…	665				flat	NA	NA								BWM						17.7444		1	245	156	665	13.3835	23.4586	36.8421		0.8465		-17.629		21.5549	54.7949	63.7436	7.66151	3.88111	27.5387
13514	13541	WBGene00022499	set-30			ZC8.3	Q23084	Q23084	MSSGDAPLEVVGVEKIGSKPRSKEFYPFAYSLLDCTKDDYCWTCLGENVELTCEQCKVAKFCSKQCETSGAIDHKYECGPLKKCPDLNTDERMLIRIVGRYKDIHSGKDKSIDGFYNNRESKRSVMEIWEHCADMKKDENAMKSFKKTYDRVKQFGDTNHLMDEEVTFQLHSRNFINRHSISNVDYLREIGKGLYLDLCKYDHSCRPNAIYSCNGIVAKLRALHDNVDLENVETTHYTYIELPPCKIQRRHMLKETWYFECHCERCDDPDDNWLTSVLCPVCISKTEYRKTIKLHGPEAYANPETLEIVCDRCSTTLDREYIFMALDGMRTIRRTVEGAEDETKDPIELLKIYQGALMTYERILPMSNAYFCQLIAAMIPLISRVSMTKKERLVASLDL…	560				flat	NA	NA								BWM						3.75		1	68	63	560	0.892857	11.25	12.1429		0.0669		-22.019		14.5198	57.3888	33.7951	18.5483	12.7806	36.0206
3203	3268	WBGene00023408	cex-2			T09A5.1	P45961	P45961	MHPKAANPKEFLESKWKHAFTTFFDLDQNGLIEWKDFKDLIEVIGEVRGRRSDFFMTARLCLPDIWQKMTEAIGKEEEDIITLSDWIQLCQSSRKSVREPAWQKAYVEYMFKLLDESGDHLVDQAEYVQVLGYFGVNRKDSSHCFDQFAFNHQGQLINSIDKKKFHVLWKQFFHSEDPSSPGNWLLGKV	189				flat	NA	NA								BWM						0		0	6	0	189	3.1746	0	3.1746		0.0025		-18.191		37.5166	36.6863	15.2395	52.9452	55.9445	84.4412
13536	13563	WBGene00044049	sfxn-5			C41C4.10	Q5FC79, A0A131MBC0	Q5FC79	MALDETLFGYPIYPKFKLGEPRFPQDTFLGRYLHCLDVIDPRTLFASNKKLEESLELLNSFKAGTATNVPDKSLWEAQKLKSAILHPDTGEKVLPPFRMSGFVPFGWITVTGMLLPNPSWPTLLFWQWMNQSHNACVNYANRNATQPQPLSKYIGAYGAAVTAACSISGGLTYFIKKASSLPPTTRIIIQRFVPLPATSLASSLNVICMRWNELETGIQVYEKDTGKVVGVSKVAAKQAVTDTTMVRAFLPVPLLLMPPCIMPYLERFKWVTKTQVRHIFVNAIVCTLSFAVSLPVALALFPQESAISREQLEPELQQKTKNSLLYYNKGL	331				flat	NA	NA								BWM						8.45921		0	10	0	331	3.02115	0	3.02115		0.0102		-5.353		26.9148	25.6988	16.0919	40.6141	51.0366	54.0604
13500	13527	WBGene00044070	set-18			T22A3.4	Q8I4F7, P91821	Q8I4F7	MAVKKNKNVPKQEDPLVQKDEISSIHARIKIFETPFATQVLNPKVSEFCANCLRGPAPGEKLLRCGGCNFSMYCSKECQATAWLVHKPECKRLKASFPNLPLTEVLFLSKVIDRIQFLEKNGDKLGIEAERKFSSLVDHKVDIRDDEEKMAHFEKIFEKMGAFRGEEMIEKGEFFDVFCKATINSHSIHTNAGNEVGMALDLGVSKYNHSCRPTCSMVFDGYRVCLRPLVPGVDAENTEEAFISYIDVGRSKYIRRRDLNSRWYFNCECTRCMDPEDDALTAIRCANPACDAPILTSETEEPMNIACEKCKTIVEEDTVKAAQEYMKTLPASFDPKCPAEILKELLAKAEQILHPSNVYVARLRTALFHVTGTLTMDNLSSMHTQIYNNYKMCFPKADR…	501				flat	NA	NA								BWM						0		0	29	0	501	5.78842	0	5.78842		0.0116		-18.835		19.2459	50.8622	16.0919	19.6807	27.0376	33.4046
16481	16499	WBGene00044078	tag-243			T04A8.4	A0A1I6CM93, Q22133	A0A1I6CM93	MPIGSASDTIRKFNAVAQANEEVLKKNPYSDTYKIQAFDTKNYGRPPPGSKTEARGIKAGVHVCREILFLCETIDSNADGEEPHKYVKFGKLFNIYSFYSDKLVGMLIRARKYGLVHFEGEMLYQRQDDEKIITMLMSLQEIRESLTASGDPANCIQIRRNSEPVAFVPPVSKEAPRPRPIRSDSVTSSKAKFEAPPPPNTDSLPVQGRPKKPWTPKDTSKAPVFCSY	228				flat	NA	NA								BWM						0		1	109	64	228	19.7368	28.0702	47.807		0.2776		-20.127		48.622	60.0197	29.2606	37.9735	31.9725	81.4419
19241	19248	WBGene00050884	Y69H2.15			Y69H2.15	A7YX59	A7YX59	MASFLKKLVKDRSKSPQKRRNHHVPPENGHISRQNYVPPYAPYAPVCYLPLPPSPVPPHQKRSSSRSNESFGIHSWNTEPREIDDTPPFFTQKSTDFQAPPTSPGPLMRTRSHSPRKLKRESNEERKLKSKSKSPQKRATSGTVISQLDYLNSQCHLEGCRADIVVNSTRFMLCRHQLCHASVFFKDLLAGKETNKDYNITVSSMSEPTPSTQFRWFVESCIPCPALKDISDETLETCMRLSQRFQAKGLELRCMKFLIENAHLRQPIVVLCWLNWALKHNFDTQTHAALLPSVSRLSLNALQRHRHMITEHIYSDIITAKLRSTYDKTVQVFLAIHKIDHFSADVDVCPRCKRSKDGMKIKIHCDPCRKQVGCDRCYHDGCEISSRAVEDLQAFFKCP…	456				flat	NA	NA								BWM						5.04386		1	174	145	456	6.35965	31.7982	38.1579		0.5423		-6.245		80.9899	77.6713	71.2257	78.0226	19.0346	94.9816
1286	1353	WBGene00077591	C06G1.6											flat	NA	NA								BWM
3076	3142	WBGene00000395	cdh-3			ZK112.7	P34616	P34616	MTIRIFFSIFLLNHLIFFHLFNFTHQFSEETIKFSVSEDAKLNTIIGHLEAEIGYTYRLSRGNSKIKFDEQTLELSVSSPLDRESENAIDMLIITSPPSIIHILIDVLDVNDNSPIFPIDVQRVEIPETAPIGWRVQISGATDPDEGKNGTIGKYELVDSLATVDTMSPFGIVQSDGFLFLEVTGKLDRETRDLYSMRLTAIDQGVPELSSSCHLNILILDINDNPPNFGIRSLTLNWNGLPNTKLFSLNATDLDSNENSLLTYRILPSGPTSEMFSISDENILVTQNNTECLQRCEFVVEARDSGVPPLSTTLNIVVNMEYGNEHEPNINIRFYPSDYPFIIVQPEDVNGKTLAILSITDSDGPLGANSTIWIENGNEQSIFSLISRQSINILTVKHV…	3361				flat	NA	NA								Glia			SS			2.9753		1	87	60	3361	0.803332	1.78518	2.58852		0.2484		-9.236		0.501105	87.5903	94.5689	0.36846	0.0393024	0.358634
7695	7756	WBGene00001392	far-8			K02F3.3	Q21152	Q21152	MFTLRACSLILVSVAVFVLGRPAEEQMTEKDFTNLVFTVEKFDQILKAYSEYKQFMPSYVLEPLDNITDEQKTQAVQMVNDYHAGKFEPKNYDEYIAIMKKSYPALAGPYETMYNKYKEQVAKLGPKGQEYCNGLEAQMYTDASPDRVVWACHIFNNAKSAVSGAKALLQDDSEAAKIEEAFPEAVKLLNSKKFEAYSIIVNNLKPLDCVKDREQVFNTIKLMDKQSVLTNN	232				flat	NA	NA								Glia			SS			0		0	35	0	232	15.0862	0	15.0862		0.002		-18.007		23.3997	52.8519	7.33972	27.777	65.2837	49.0346
9974	10033	WBGene00002181	kal-1			K03D10.1	G5EDX1	G5EDX1	MILLLLLFILGSVSPDELISTRCQAQCLHLMDQRLQNNMELRKTLKHHIIQLCKEDATCSACSAPCREQFDDIKACKKSCVASDDRETCEDSCHYLQRIYQEKPGACPSVSNQSNYECSALCQMDGECPETQKCCSSGCSRQCLKPRSSDIKLLPIPRNISVQERKRKRSIIIRWATGRLSKAQQNENANLFLVQWRWGLHADESAMTEWQTVTVRNKPYAILKHLLSPGRFYEFRTAAVSQEGSLGFSSPSKPFKISKEAKAPPPPKDLSLGASKVVASGLWNQMVHWNPPPSDLPIKNYQISWASSTKSEADAFEEQMRKKSTLEFAAHEKRSLQSDDDEEFIGIQERDRQSVVVPSHATSSEITGLFPNSVYLVEIHASVDSSDGELHGEKGVVFI…	700				flat	NA	NA								Glia			SS			5.71429		1	82	43	700	5.57143	6.14286	11.7143		0.9725		-13.36		74.0064	81.4517	79.3245	36.2024	10.8425	39.9067
10263	10321	WBGene00003029	lin-44			E01A2.3	Q27886	Q27886	MRAAPFDFFFQSTALSTFFILCSLATNEIPTISGAPAGKIVQPPKPNILKQGCPSDLLHSRALRSIQLACRTHPATVISAFEGVQEGLQNCANRLRFQQWDCSEAGNIMHDPPLLRQGFRESSLIWALSSASAAWGVATACAQGWIDDCACNNQMGQNEYEFGGCTHGVQHGITASRKLLTKVGAVNTLLRKVEKHNLKAGRLAIKKTLISSCKCHGVSGSCQQKTCWKRTATLEHITDYLVEKYARAKLYTDDSVVKTTDLIYLEASPDVCKAKSVAGRVCAWRNETHTQGDCDRLCCGNGFSIRHEVVRVKCDCEFVWCCNLVCKDCIQHRWISTCNGTPPKSLIF	348				flat	NA	NA								Glia			SS			4.02299										0.275		-17.705		29.973	31.7367	23.4439	49.4154	53.4095	34.4264
11168	11218	WBGene00003549	nas-31			F58B4.1	Q7JLI1	Q7JLI1	MILQLLFYSLFTHLAVSQIDVNQALNQNKLNIDTISSSAISDAELEKTFPRTNLSRMRNALKSLRQNWSAKLQAMPARNYQNAGTNQENGATEQQKPLREKPRDRVKMEGDTLHQVNKAAGLNDILYQGDMVLTDDQIATILEARDETTVSTASRARRQAYRDRYYPSTTWGSSVYYYYDRTATPKIVKAFEQAVAFWQNVTCINIMQSSTAINRIRVFKGQGCYSYVGRISGVQDLSLGTGCEEFGTAAHELGHALGFFHTQSRYDRDNYISINYANIDPSYVEQFDKETSNTNFNYGMPYDYGSIMQYGATSASSNDKATMIARDTEYQDTMGSDFVGFYDISMMNEHYKCKELCPAASSAQCKNGGFPSPRNCAICICPSGYGGILCDQRPPGCGD…	578				flat	NA	NA			2.29101	3.09282	0.00046312	0		Glia			SS			13.0933		2	105	69	578	6.22837	11.9377	18.1661		0.2487		-1.397		35.242	73.434	5.25424	86.8435	95.0504	11.3043
11169	11219	WBGene00003550	nas-32			T02B11.7	O16977	O16977	MRRFFICYIGFLSIFLDFILADKDNNSEEERDRKFDWKFENENGKPEHETVTVPKLPDGSYFWKWTWNSRINSTTAATPTSTVTTSTSAPTTSPRVYKLKSEARKSLRKALRGVPPEKRKKQLKKMGKKMMKIPKITKKESNKLHKSYRKVKITENPPALDMFEVNERAGLNEYLFQGDINLNNNQIAKISSEQSSKSRRKKRQIDNLAQFWPGKVVYYYFDSGLTTTVQQIVRDAITFLESNTCLKFELNSTATNRVKIFSGVGCYSDTGMLGGEQTLSLGYGCEVTGTAAHEIAHTLGLFHTQMRSDRDDYVTIDLTDVPESSQQNFIKLTEATSTNLVDYEYGSFMHYSGRAFVSSGGVDSIVPKDPVMVYTMGGRIVTFLDLKMLNTHYSCSCPT…	653				flat	NA	NA								Glia			SS			9.80092		1	86	32	653	8.26953	4.90046	13.17		0.8393		-8.919		43.5962	72.5473	40.8622	24.6401	54.7015	20.0516
17201	17211	WBGene00006886	vap-1			F11C7.3	Q8MQ79	G5EDN8	MAVLAVVLLLACLERAVAQTFGCSNTKINDQARKMFYDAHNDARRSMAKGLEPNKCGLLSGGKNVYELNWDCEMEAKAQEWADGCPSSFQTFDPTWGQNYATYMGSIADPLPYASMAVNGWWSEIRTVGLTDPDNKYTNSAMFRFANMANGKASAFGCAYALCAGKLSINCIYNKIGYMTNAIIYEKGDACTSDAECTTYSDSQCKNGLCYKAPQAPVVETFTMCPSVTDQSDQARQNFLDTHNKLRTSLAKGLEADGIAAGAFAPMAKQMPKLKYSCTVEANARTWAKGCLYQHSTSAQRPGLGENLYMISINNMPKIQTAEDSSKAWWSELKDFGVGSDNILTQAVFDRGVGHYTQMAWEGTTEIGCFVENCPTFTYSVCQYGPAGNYMNQLIYTKG…	424				flat	NA	NA								Glia			SS			4.00943		0	18	0	424	4.24528	0	4.24528		0.0965		-8.296		31.3952	73.8172	4.28887	35.3918	95.0504	23.9204
1378	1445	WBGene00007450	C08F11.1			C08F11.1	Q9U3Q9	Q9U3Q9	MRICPTIFAVLIYIPCVGTQQAFASVSYSAIQKIIPHATNANTFALAQGLFQNRGKFAVMRQLVNKFFNQNKAGKPQPKTLSLYDNSTYSKQKMIALVNNRQAVTQWWNQDMTPGLKKIYNAATASTYKDLYAYFDNRYINSFSYTLAYWMLTVLMKDMFDESSFNKTSDLILDSLTARLEKNSAIAFEIYTEAFEKNHNQTLMKGKW	208				flat	NA	NA								Glia			SS			0		0	20	0	208	9.61538	0	9.61538		0.0048		-2.168		25.4483	53.8369	3.8762	30.0295	77.7499	51.5033
1740	1807	WBGene00007652	C17G1.5			C17G1.5	Q93241	Q93241	MRIFTACVIISLVTFGDGRRRIYTEEDEAKYLNELKQQELRNFELEMRQQTNQRGVKYSSGMLGVQLDGGASESDDLPNELRGPVSTWNKKTSRTQPKEQTQALALRSKPSFEMSSLTRKSVEISDGIDDDDHWCYYCATPIDKVKPDMRRSIRNLLEMRRTAFPVDAVTNDCYSAKNLTRLKKQKCSYKYCQTLSILDRNAGNSFVVRGCAEHFGAINVPELEKKSDHSCEMLHEKLEIKECICKTSKYCNAGWTKRSANGVFQHSRVAFIALFSILVML	281				flat	NA	NA			1.87944	2.96007	0.00046312	0		Glia			SS			0		1	106	86	281	7.11744	30.605	37.7224		0.0165		-14.532		49.0666	48.9266	41.6581	49.4154	47.5215	59.7765
3427	3489	WBGene00007820	clec-199			C30H6.1	A0A0K3AXC2, D3KFV8, C6KRM5, A0A0K3AV02, A0A0K3AUD0, H2L2E0, A0A0K3AUC7, A0A0K3AXC6, A0A0K3AS08, A0A0K3AV10, C6KRM6, A0A0K3ARH5, A0A0K3ARH0, A0A0K3AS16, A0A0K3AS12, D3KFV9	D3KFV8	MNRFFCLTVLFSYLYRFTFSANDNAKIDNLVARQYLFSNFVANNREALKKSDGSDERWLFKFMNENSIIPPTSNSKSGSLADSGQAGLVLADAIGTAKCASGWTRWTGNGCCYKEMASPMLSWYASEDWCYSQKAGAHLASVHSRAEAEWLNYQYKLWWSKMDDWIGLRRNCDNTAWAWTDGTPVDFLWWQPNYPIYGGIEDSCTAMWDSTVLRGMYDFYPGQMDDGRSCTGSVAWALCKYDPNTSIISPKWVKADCTTTSTTTTSTTTTTTPTTPTTTTTTPTTTTTTPTTTTTTPTTTTETTTTPTTETTTTPTTTTPTTTTTTPTTTTTETTTTPTTTTTETTTTPTTTTTTPTTTTTETTTTTPTTTTTTPTTTTTTPTTTTTTPTTTTTTPTTT…	657				flat	NA	NA								Glia			SS			42.2789		1	284	265	643	2.9549	41.2131	44.168		0.9503		-15.932		0.437239	0.103169	0	0.916237	3.88111	33.8909
3426	3488	WBGene00008203	clec-198			C49C3.13	Q9XUF4	Q9XUF4	MVVSMRWLLSVFTFLCMKYSEASNPRAIILQNFMDSNKEAVKNLKDDNVLSKALVKTFGLNSSSSSSLSDESSSNLVLMDSTTPCDSGWTKSTVNGMCYKIATADTTWYAAEDWCYSQRYGSHLTSVHSEAEAQWIAATYVSTGWFPYMDNWLGLRRSCDNSTYIWTDGTPVDYLWWQPGYPGSGDPEKSCVTIWVTSLLKLNPGYVQGQFDDIWDCGTNLATPTCRYDPTSTAPHIKYDTSYTCASTTTVSTTSTVTTTKPTTTTTTPTTTTTTPTTTTTTPTTTPTTTTTTPTTTTTESTTTETTSTTTPTTTTTAPTTTTTASTTTFKTTTITTTTQTTTPTTTATTTKPTTTTPTTTRTPVDCSAKCDPFWVSYSDGCYAKIQGTATFETAKLGC…	499				flat	NA	NA								Glia			SS			26.2525		1	164	133	499	6.21242	26.6533	32.8657		0.1512		-12.545		6.93933	44.6156	6.0452	5.25915	35.7775	28.8873
4150	4212	WBGene00008369	D1053.4			D1053.4	Q7YX64	Q7YX64	MASIWRCFLLLTTVSFLANAQSSRQRNNGMVRCNKEIGNSFSSCQGKYCYKMHTPDDTTVDGIVKKGCMNAADAQTEVGKCTRRPLEEGGAELMCVCNERDFCNSALLQSLTISFFVVFVVLGLDVF	127				flat	NA	NA								Glia			SS			5.51181		0	32	0	127	25.1969	0	25.1969		0.0362		-13.872		43.5962	35.5072	15.2395	63.6281	66.5979	76.0771
5062	5124	WBGene00008554	F07C6.3			F07C6.3	Q19158	Q19158	MRLSPLFSSVFFVFCVVQYVDNQQVFGSIAFSAIQKIVPHASDVNAFALAQGLNSIVGQYSAQRTLVNKFFSQNKAGSPNPKTLSLYDNSTYSKQKLIALVNNRQAVTQWWSDLTPGITKIYGAAQATKYKNLYAYFDSRYINSFSYTMAYWMMCVLLQNAFGDEADYNATSDLMFDSLEKQLNKSTAIAFEIYTTAFEANHNQTLMKGKW	211				flat	NA	NA								Glia			SS			5.21327		0	5	0	211	2.36967	0	2.36967		0.0281		-2.326		25.9519	47.9833	2.55711	37.9735	84.6794	43.5077
5765	5826	WBGene00009056	F22D6.15			F22D6.15	Q7YX34	Q7YX34	MFRLVVLTICFNVLVFIVSAQSTETILAKLGANATIPLPVSPNYRRIVKNADYKDEEHIYRVCNGKNKKTCGFWENVKTKKKVTGSTNYNKKQKALTVKNLKESDFGDYMTGNKKVVKNLHKLIVKG	127				flat	NA	NA								Glia			SS			0		0	20	0	127	15.748	0	15.748		0.0081		-26.672		40.2899	37.8728	9.35888	51.663	55.9445	76.0771
5915	5976	WBGene00009146	F26C11.1			F26C11.1	Q09549	Q09549	MNKLLIFIMLVTFLAIEKSFMSEVDNMKLEFVQTIWRHGDRSALEGLFPISEKNWTFGGGGLGELTPMGMSEMNNLGTIFRRRYVEDQQFLSHRYAAKEIYIRSTNLNRTIISAMSLLYGMFPPGAWNIQGVDYPNDVDWQQGFTFIPVHVDGIDQCAVAQLCNCRRFQELQEKWAELDEVKNATVAMIALNRRVAAFYNVTDQPEKFNRYTDAWKCQRNWFNDTMYQQLPWYNEDLYNEAQRTYAPFKRFTEGNFAKPSIVDGIDIPQEVSTLQGGPLLNEIFERGREKIRCVADAENCSIDYLKPLKFYAYSSHDQLVYALLVTLGITDVVKTVDGWPDTSSSLTIEYYSNPGNQSSVKFLYRDNSNDNFSDVTSQIPVCNGAQYCAMSDFQNIAYQ…	435				flat	NA	NA								Glia			SS			1.37931		0	46	0	435	10.5747	0	10.5747		0.0119		-2.735		22.9845	64.0776	3.65512	50.4888	32.8764	41.7416
6246	6307	WBGene00009388	F35B12.9			F35B12.9	Q8I4J8	Q8I4J8	MKHSLLILISVLAVSSVEAFRQHAPPRPQFRDISDSSDESSISSEADSFEDNVVQNKNTNQQRRIDPDMMIQAKRKFNEAPLDVFGKKKNTFFDRPSSEELEAYDDKVRQQKMNRFVEDDEPIMIQGPVDPEFARGPKPKTMKPKMDDAEEKVFLTALGQIYLDKLDEEQRTNERYPGPLGPIGPMGPPPPLDYDYLFVPVEAPSKMESNNNGNNNVHVNVNHVQVNSNVLHVPEKDKKNIEKHEDMPPIIPSYHDSEPSSTSQFLYFNFNTFDILVLSVLIAAFVFATKKAYTKCFPKKTVAPQLPTTLPPTYTPSSIVVETVSKKTPQ	330				flat	NA	NA			1.54804	4.61775	0.00422558	0		Glia			SS			30		1	141	92	330	14.8485	27.8788	42.7273		0.7408		-0.261		74.7015	80.8671	39.1722	68.3911	40.7369	89.4989
6256	6317	WBGene00009406	F35C11.7			F35C11.7	Q8I4J7	Q8I4J7	MNAFWLMAFLSLTSIHKVHTQTANIIEIQIPTNAPQSSTSCSTATWLVWSDWSTCSDECGSCGVQMRTRTCLTTDSTCTCSGSSTGVQYCNLDICRYPRTTCCNNFRVTSYLGRFACLNATALEG	125				flat	NA	NA								Glia			SS			14.4		1	38	32	125	4.8	25.6	30.4		0.0718		-22.442		41.2847	31.7367	13.0115	65.9224	82.6333	74.4338
6530	6591	WBGene00009577	F40F8.4			F40F8.4	Q20226	Q20226	MKYLVIFPLLAAFSVALPTASKSNEQLELLVDQIYPDISTYLSKTQIRTLFRALSEVVRKSRTLEQIGKEMIEPTLSTMTADQKSESWESIQKAEKAFGGFQQLKVIFFHALDAVQDFMGDAMDKDRAEVTANAKGKTEDEQLALIYEVFRQYFNIEFGQKIMDTVKYSMTEEDWAIATEDAAQYLAVENFNLVY	195				flat	NA	NA								Glia			SS			0		0	0	0	195	0	0	0		0.0066		-28.95		23.8394	43.4169	7.71801	30.8057	65.2837	45.4729
6633	6694	WBGene00009626	F42A8.1			F42A8.1	Q09321	Q09321	MQNNLVLLILSILSIFEVSAYSNVEKGAAARARCWTSGNGRPAQWWQEGDQVTRGKYFYECRRGQLEPLGCLSSTEEKIPLGHTFQQDRYEFICQLGSDGYIEFGYSACVGTDGRTYQKGETWTDAKNTYYYRCRDDGRVVKTTIEGCIAHDKQRRVPLGQTDDFNGYTYKCQQKTTGVVQMCSVGCIHEGTRYTVGQQYRDGDYLFYCKLQGGKCTKQCIGCVAGGQDLYDGQRYKRDGTTYQCEIRPGKRSHRAVGCSIVENGRDINKVIGCRWYEQNPDWKIEKTCETDGDNKTKVTTVGCIYKYKGFDRIFLEPGKYTIWNLPKQKDSSVGLACRKTADGAELVIFDVAQLERNTSGLKYDLPRGK	370				flat	NA	NA								Glia			SS			2.97297		0	28	0	370	7.56757	0	7.56757		0.1353		-15.732		49.5898	37.8728	32.0757	45.1511	49.8624	47.2759
6777	6838	WBGene00009724	F45D3.4			F45D3.4	Q52GY5, Q20420	Q20420	MNFSLFFATVLLTAFAASKPTTTTTEKPDDSFDLDLFLGAMGDGHFADGNGNVDGVVPMTPKKSEKLPGQKKVKDEFEQPDGVVPEFTGSFVTENPETASASTQTSDEDTDEDYFGESTGGAAVAGPITNPAATYLEGSDFEKVTQPSCQMLGCTGPIPNDGSYSALSATLDNKACNQIFVAMNGCTDNKGYPMGMLCSVCCDCANSFVQEMKKTFGYKSNIPTSTFN	228				flat	NA	NA			1.58352	4.03946	0.0212246	0		Glia			SS			16.6667		1	130	123	228	3.07018	53.9474	57.0175		0.3226		-13.306		67.1629	64.0776	34.7237	56.5291	93.1589	75.2665
6943	7004	WBGene00009843	F48C5.2			F48C5.2	Q7YX17	Q7YX17	MIATTVFGLMMMHVGAASIQSCLFLPNVMLNGGTVDEFQTDDITQCCVQCSSSSCCIAYTYDTVKKRCYLKNAIGFSTEDFSKTSGLKPNSRYGKGVTLKNVKILGDQTNRVELRSEEECRQYCTAYQVFSWGPPNHDQMIRSGECVCTMRIKSLSYEYGCTSEINPAQG	170				flat	NA	NA								Glia			SS			7.05882		0	21	0	170	12.3529	0	12.3529		0.031		-22.042		41.7072	17.6247	19.7494	63.6281	61.1373	62.0437
8069	8130	WBGene00009968	fig-1			F53B7.5	G5EGB4, H9G2W3	G5EGB4	MSLSPVALQTALLILSNSSATTLTDIPGSSKKLITGLNVTDFLDQVQKTTSTAAASDCSTSTWNAWQEWSTCTETCGSCGTQQRFRSCNKPVDTCTCSGSAFEKEYCNLAVCKFPLASCCSGFTPQSSGGTFVCLASS	138				flat	NA	NA								Glia			SS			18.8406		0	14	0	138	10.1449	0	10.1449		0.1712		-24.526		48.4083	40.1646	27.2144	57.7598	91.5942	59.7765
7161	7222	WBGene00009995	F53F4.13			F53F4.13	Q20724	Q20724	MNSIWTSLFVAILAVSVIALNENENNYLQELLDAGISQETANKLVDITASHNNDGEISEKSGKTIFQEIISETDAAIKQAPANDQQAYKAFVESKAAEFGQPDEISIQVESDSE	114				flat	NA	NA								Glia			SS			11.4035		0	18	0	114	15.7895	0	15.7895		0.0046		-24.792		44.0948	44.6156	13.7141	55.2788	84.6794	54.0604
9483	9542	WBGene00010512	K02E11.3			K02E11.3	Q21141	Q21141	MRLCSVALLLFTVAYVKSAIDINVPSTLYIKEGDTGTIGLPVSANYRREVHNPKGTMDEQLYRVCNGKNKTTCGFWEDVKTKKKVKSGVTTYNKNKKALVIKKMLVSDFGNYMTGNKKKSRYVQQLVSLGK	131				flat	NA	NA								Glia			SS			9.92366		0	21	0	131	16.0305	0	16.0305		0.0117		-24.847		49.8428	30.5036	25.3918	54.1341	59.7028	71.7612
9484	9543	WBGene00010513	K02E11.4			K02E11.4	A0A2C9C3E6, A0A2C9C3B3, A0A2C9C3L8, A0A2C9C3L6, Q21140	Q21140	MVRTCILAIFSLLVIGTNSQPGGGGMPGGGGMMYGKVNATVTISLPVSANYRRLVVSLKGVDEEHIYRVCNGKNKKTCGYWENIKNKKKVPSGVTTYNKNKKALIIKKMRLEDFGDYMTGNKKTKLFVMNQTW	133				flat	NA	NA								Glia			SS			11.2782		0	25	0	103	24.2718	0	24.2718		0.0154		-12.336		57.4969	19.2041	14.4461	69.6536	85.6915	71.7612
9485	9544	WBGene00010514	K02E11.5			K02E11.5	Q21144	Q21144	MVKVCLLALFCLCAVVTDAQMLGGQIYAKINATVSISLPQVANYRREIQNEKDVWEEHIYRVCNGKNKKTCGYWENVKTKKKIPSGPTNYNKNKKMLVIKKMRLYDFGKYMTGNKKTSKTVMFQAW	126				flat	NA	NA								Glia			SS			11.9048		0	19	0	126	15.0794	0	15.0794		0.0117		-25.187		48.4083	36.6863	15.2395	57.7598	70.8843	74.4338
9486	9545	WBGene00010515	K02E11.6			K02E11.6	Q21143	Q21143	MVKVCLLALFCLCTVVTDVQMLVGGQVYSKPNSTVTISLPQVANYRREIYNNNDAYDEHIYRVCNGKNKKTCGYWENVKTKKKVPSGVTTYNKNKQALVIKKIRVSDFGKYMTGDKKTTRTVVNAPWL	128				flat	NA	NA								Glia			SS			0		0	20	0	128	15.625	0	15.625		0.007		-15.527		40.0688	30.5036	8.91427	50.4888	54.7015	63.5004
9487	9546	WBGene00010516	K02E11.7			K02E11.7	O62297	O62297	MLRPLILCLLTIGWPSVISAAVSTPGPSTPRPILAAFNDNVTIPMPISSNYRRIVEPTYGVKEEQLYRVCNGKNKKTCGYWENIQTKAKVVAGKTTYNKNKKALIIKQILKTDFGMYYTGNKKFEQKVNSLFLRG	135				flat	NA	NA								Glia			SS			0		0	29	0	135	21.4815	0	21.4815		0.011		-17.968		45.7431	31.7367	10.4274	56.5291	57.1088	78.3616
9920	9979	WBGene00010773	K11E4.1			K11E4.1	Q21428	Q21428	MPVRCRTILVILLFCIVGANSLVNYDSDSGRRFLIWALCIGATNPEKCVETEFYGQQILATFEADCSDLIFAGKCRVVIDVDDGYTLLGITFKSESKIQSTTSTSLNKQVLTNFGAYGQVQTDLLTAFGRLWNSGLGAYMKQLWTEYCDLYISFSGYSMGGCLAQMAAVRFQEEKWWPAEQMFYFGYGSPRCGNEDFAYYVDSSLADKFNIVWFNDQIPEFPTSTCTFGSAAAMGQCTSSYFSCCTTIHYTSWSSVALNTYNTCASNMCPVTTPTASDHYSYFETTAADVNSLTCTDTKKFP	302				flat	NA	NA								Glia			SS			0		0	25	0	302	8.27815	0	8.27815		0.0517		-13.275		20.5429	23.1565	11.0391	43.2302	83.6527	40.5183
12595	12623	WBGene00011019	R05A10.2			R05A10.2	O45698	O45698	MSKLVHFVFFLSIALHVIARATESSESDTMESSRSSSSEEMRYNEDLEDLVKVDAGNSTIEEVKDSSENSKKSGEIEVKKADKPAAENDLEKFDKGLNSDKKEYVQKRSHVDSISTNSTENLSDDEMDVMAHLNKTMDSEEDMQKNNETVLGIDTFGAPGI	161				flat	NA	NA								Glia			SS			13.0435		1	138	129	161	5.59006	80.1242	85.7143		0.2715		-28.611		62.5743	62.8224	48.6883	68.3911	72.2771	63.5004
12596	12624	WBGene00011020	R05A10.3			R05A10.3	O45701	O45701	MGSRSCTLFLTIFQQILMRHLNIILLSILVGLLHGSLEDENSGTDGSASKNESTFPENSGGPMILPMPVDEPGSSGSGPELPVMEGMEPGVPEQSTMPPVDPAEYAKLEDDTNGEDDITGPTTPFDINNMETGVPEGPTKEPYMPKPITKPKPGQNNSGSFSDSTDFTDSSDYTRYTDGSTDYPGGSTDVPGGSTDSPIDGSTDLPIESIPPVYWTKSTPKDFTISQKIDQSSPGYNQLLHMLEDLKHRRKEEEFIEAAQTEFYIDRASTLMDSIESSFTDSALANITKSQEYIKGLLADASLPVRQGYSEIVSLTSQPSFYYIPKRQRYLMVNKIVTDMSSASQLEIMTINQQAKTYCRDANVDTPPYALGNLFGNMLGNGAVLTK	387				flat	NA	NA								Glia			SS			9.56072		1	199	197	387	0.516796	50.9044	51.4212		0.5152		-10.351		78.8529	79.7814	65.5736	79.0494	61.1373	85.8241
12597	12625	WBGene00011021	R05A10.4			R05A10.4	O45700	O45700	MNLSIFSAIIFSITIASSAIPISENYVSWSSDSNCLDFDDSRDPNAVCEATTTWKRSENSSCIVSVYYVKKEKSSGTSNGIPQCSKTPCDATEKIVVDCETAFREKLANINH	112				flat	NA	NA			1.67794	6.9873	0.000517241	0		Glia			SS			17.8571		1	53	43	112	8.92857	38.3929	47.3214		0.023		-28.378		38.988	40.1646	9.85753	51.663	64.0334	65.1363
16475	16493	WBGene00011072	tag-209			R06F6.11	Q09418	Q09418	MLKLLAFVALLSVSVSANVDMTGFGLPADNHKVALGGPIQESAGLADEGEQQLQLVDVSPQDEGQQNVAHVREMFSNVFNSIKTQREQAMAANGSQPTD	99				flat	NA	NA								Glia			SS			16.1616		1	69	55	99	14.1414	55.5556	69.697		0.015		-9.702		64.0236	49.9312	23.4439	84.1439	88.17	76.8558
12830	12858	WBGene00011244	R11D1.3			R11D1.3	Q21932	Q21932	MNQLTSLILVLLVQYSHGATNRDTMMDMVTQKLGVTFYTSTELGVIAKCCETQFWKTPNNSTAVLAEGKKCVLNNSGNKAVQALSLYSNANNCLNPDSLDTVVTKLIGPIETLTAALVKKIKATLNDCKKTNTQPAAAKQETCLQKTYGVAKAAITLTYCDGICKKVVNQHVSAKWWGCALKLLPSVMNTSKWNCSKIVKS	201				flat	NA	NA								Glia			SS			0		0	18	0	201	8.95522	0	8.95522		0.0107		-19.992		23.719	26.8902	19.7494	31.5942	82.6333	38.2633
15369	15389	WBGene00011326	T01D3.1			T01D3.1	H9G306, G5EEP6	H9G306	MVFKYSILLLLLLQYTRESLGLFLRVETGHQNIAIDGRDVYYGHYTKIHFHNVTCIDALDIHCLKELTGAEEIDLLYTECQKGHWKVAHYTNAKHHFRLKEPIHALRLLISSRRELSVIDAQVQSCSYPPAPPSECHRAARNHNHRHGKSGSILRAVDPYSQLEAEMEAEIEAGARALARALTPSTPPVTTRSRRVRRDVEDITKQDQDVQVMHGDQEITEDKVVPVGSQLDVAAGSKWKFRKGVGLVVYGSLNLKGNTNQPIIFEPSTKNARWRGIEFRNSSESSLTHVNITGADVAVSVKSGTSPDMDHVVVDGNVYGVQISDMDSSSTTHLKSVVSVNNEKTGIEYLGKV	353				flat	NA	NA								Glia			SS			8.4005		0	23	0	353	6.51558	0	6.51558		0.2539		-18.308		49.8428	55.7062	43.1516	61.3854	31.9725	36.0206
15558	15578	WBGene00011484	T05E11.8			T05E11.8	Q22237	Q22237	MAQNLIFITIALVAIVNAGPGEEREKGPGEHKRGGKHHGFPSFFGNVSAEGRKEIAVVFKNENLTLAQADTQIASLAEKYGFAAAYKEHKEKEAVRQAETKKNTTTVINNLSSVATKLSAIRENKDQTRKAQHEAIEALRNENGVEVDTIEFIAKRSRGFGGRHGGRKGGKGGKHFGKKNGDKKRGPHGGDEEGKKTKEAAQ	202				flat	NA	NA			1.59717	1.365	0.00440034	0.0163438		Glia			SS			31.6832		1	79	44	202	17.3267	21.7822	39.1089		0.0424		-22.795		67.4748	45.8413	16.0919	72.2132	94.8858	56.1066
15811	15831	WBGene00011708	T11B7.5			T11B7.5	Q22390	Q22390	MIHRLVLLTVFFCTSVVADYHKLKLGGACEALRVELEGTDDAAAKMTKLNAFLDTLGEGIRQKFWDIVAAAKTDAQTNLPSDKAKELAGEVISDFEQGNLFKSHQEISAELKSKFESLDDADKAAVKNLAKVYGKQAKALVMPHLPEDCKAKTDATDDAGKAAVAGGFDTGDYLPRKKRELLFIDNLTAAFREMRSRRGF	200				flat	NA	NA								Glia			SS			9		0	20	0	200	10	0	10		0.0062		-32.097		27.5952	56.5782	8.91427	38.8406	76.4849	52.7733
3604	3666	WBGene00012152	cnc-10			VK10D6R.1	Q7YWT4	Q7YWT4	MNFLTLLFIVFVFGTTSAQFYGGMPYGGYGGYGGYGGYPPMYGGGYGYRPYGNGGYGSYGGYGYRPNPVGGMLRGALMGAAMGAMMGKK	89				flat	NA	NA								Glia			SS			74.1573		0	10	0	89	11.236	0	11.236		0.4676		19.703		66.5979	12.2402	17.9317	94.5615	97.045	76.8558
18672	18679	WBGene00013046	Y50E8A.1			Y50E8A.1	Q9NAF6	Q9NAF6	MNFIIHYILLMSLSLSIVTARPPGRNDQEKKLTGGEPLELGDYVDYFEDFFPVLNNSTKLNENYQYEKKKYLTSVAGFPAKMRKML	86				flat	NA	NA								Glia			SS			0		1	45	35	86	11.6279	40.6977	52.3256		0.009		-25.51		53.2179	35.5072	19.7494	69.6536	72.2771	90.0442
19025	19032	WBGene00013327	Y57G11C.38			Y57G11C.38	Q8I4C2, A0A061ACQ2	Q8I4C2						flat	NA	NA								Glia			SS			16.4038		1	77	55	317	6.94006	17.3502	24.2902		0.6133		-11.427		65.0233	52.8519	51.7416	65.9224	81.5181	50.2899
19183	19190	WBGene00013459	Y67A10A.10			Y67A10A.10	Q7YWN3	Q7YWN3	MPLYPTSIFILFSGILLISNAQEAAILPIDVASPSSTESPLIETMTDTPAFLKSATDSQRKEYIELEGNPNLTMDMKQKALKNWAQRCGDPVNGLFTMYMAEKLTLQSQEDSRMAVIIGQLSPEAQQADTKVRAITTNMNQTKKEMDTNVAKQLNKLPKKVYYELTFATQ	170				flat	NA	NA								Glia			SS			7.64706		0	40	0	170	23.5294	0	23.5294		0.0082		-14.899		34.7237	46.9909	12.3164	45.1511	77.7499	57.5903
16616	16628	WBGene00013969	tep-1			ZK337.1	O46015, Q7YTU0, Q7JKM0	Q7YTU0	MRLLILNILFVVWQIHGVIGQSTNAAVVSTTAAPVKPATYMLVAPAVVRPDQPFSVCMNLLKQATDEDMIVRIEVRTERNETIAARVISNLKPGIAQTVSLSEMPAQSLTPRQSYKLYIRGETLNAELIFENENELKYDQKALSVFIQTDRAIYRPASLVRYRAIVVKSDLKPYVGNATIKIFDPSRNLISQTIGVTLDRGVYSGELQLAEETLLGDWFIEVETSNGVQDKSSFTVDTYVLPKFEVNIKTSSFITINDDLSVFVDAKYTYGKGVAGKAKVSLELPWHRWHAMVPTIIDENGVKKEEELMVERTVKLNRQGEAAVVFSNDELKRHKLLHEWGGGSIRIVASVTEDITEIERNATHQISTFREEVKLDVEKQGDTFKPGLTYNVVVALKQM…	1508				flat	NA	NA								Glia			SS			2.53165		1	68	31	1508	2.45358	2.0557	4.50928		0.1694		-7.919		4.5296	87.3004	68.6735	1.75387	4.11201	1.47875
20164	20170	WBGene00014091	ZK822.4			ZK822.4	Q23615	Q23615	MRNLILFGALVSTACSFKFLENAQTYLSGNADASVSAGSSGSNFLSGLQNSSFGQAVMGGINTYNQAKNSSGGNWQTAVANSSVGNFFQNGIDFFNGMKNGTQNFLDTDTIQETIGNSSFGEVVQTGVEFFNNIKNGNSPFQGDASSVMSQFVPFLANASAEAKAEFYTILPNFGNMTIAEFETAVNAWAAKYNLTDEVEAFNERSKNATVVAEEHANVVVMNLPNVLNNLKAISSDKNQTVVEMHTRMMAYVNSLDDDTRDIVFIFFRNLLPPQFKKSKCVDQGNFLTNMYNKASDFFAGRNNRTDGEGSFWSGQGQNGNSGGSGFSSFFNNFNGQGNGNGNGAQNPMIGMFNNFMKKNNITADEANAAMADGGASIQILPAISAGWGDVAQVKIGGD…	453				flat	NA	NA								Glia			SS			24.9448		3	306	275	453	6.84327	60.7064	67.5497		0.9316		20.272		68.9364	81.4517	9.85753	44.1562	98.1675	17.8507
20187	20193	WBGene00014108	ZK856.7			ZK856.7	Q23642	Q23642	MRVAVILLFFLSVALACDIIVHLKSDTDKKFSGQIVASNGKKSERWSYLKKLQKNTFQQKADECGLKDWEITTWDDAGKPVATVKVTLDGIGRVTYKVGDDLKAVQKDRQGAICKGQCAPL	121				flat	NA	NA								Glia			SS			0		0	4	0	121	3.30579	0	3.30579		0.0199		-35.659		41.4861	30.5036	16.0919	51.663	65.2837	72.6971
3959	4021	WBGene00015231	cutl-14			B0511.5	O61816	O61816	MIFVFVPGFLLFFHQISAIPIPNGLLGNVEVECTDTTIEAVFLTETNFLGRVFVLGHSQDKDCVSRETGRRTTSITVPRDKCGVETVQHGKGAGYTSSVNIVISFHDKFLTKVDRAYNITCLYAPTGDVVSYALTVQPSLLKDIQVLAEQPSCEYEVFDVRTRRPAEIVHVNAPLEHVWTCDGTNLDLFCMTVHDCVINEGKSKRRSKIIDSEGCSLDTTRLPNLRYENNKLSARVMSKAFRFGDDVAVEFECNVRLDLRNGTSCPRPRC	270				flat	NA	NA								Glia			SS			0		0	14	0	270	5.18519	0	5.18519		0.3012		-24.374		24.93	11.4542	14.4461	57.7598	20.2506	47.8482
1504	1571	WBGene00015710	C12D5.9			C12D5.9	Q17930	Q17930	MRKPTLLVCLVMSYFNFVDSKSNLLNSPLRVCTPKEQFVLEGKCLRYVNDLMYLTEEYPPTQITVPIAKNMSSACEKITSCFAEIECDEAQRSKEVYERKCEKIEFNNYKMQECIPKFYETVYNKSRHCTVEFDFFSTDLKTRRDAYINGKSCVVSIANERRCDEKALEYLNSSYDKFVDIMSIKPDEKKCSSLHDEMISKQCQPVLLKLGNGVVGSLDKLIKNANETKPAVENRPDVCDELQNCLQKSCFYTQHNQTNANAYKEGCEKLTLVPFSLCKFQVMISPTSTSYKCVIDSLLNPSSTMPRNSFLEDKECMRTMMGGICGAAILENFDRDWEASKTADLF	346				flat	NA	NA								Glia			SS			0		0	30	0	346	8.67052	0	8.67052		0.0934		-18.304		33.7583	42.3041	43.1516	45.1511	47.5215	64.2938
1601	1668	WBGene00015786	C15B12.4			C15B12.4	Q18005	Q18005	MRHLPLLILCYICFVENSLVSRIKRQTSVDSNAETDGNGDSVLTDASTQHFKSPDGVLGMNVTANGNSSGTGSANIQTSAGGNVGESNVNNVANVMSVGDSVNSYSDIFAAVEGEKMTSNVLQQGRVAGQGATLSNVNGGSSMQNSNGALKNGFSYGNAGGTGSINTEAEVQTQQALSWDQLMARLMASASASGLGSAQSNLDLGTGSDDQNITISGLVSGLNSNEGLVNTLVKGNGIINGTDQKMTGTMYGVASGKGNSTLVGASSIVSNQSSSAGEIQAFGNSNAFSDGNSSVNLMSNTNIESDSGLGVVHIDGAGQGTDNYVVASNGLKFVNSENDAAFVGSGNIRGSGSDTNSLASQSVETAVDPSGIVKIISKSNGSSISHDNQNSSLTFNNNG…	545				flat	NA	NA			1.53671	1.43635	0.0231125	0.0223541		Glia			SS			18.5321		1	532	529	545	0.550459	97.0642	97.6147		0.8916		9.266		94.9988	87.5903	79.3245	97.8605	99.6463	7.5829
2247	2313	WBGene00016362	C33G8.4			C33G8.4	Q18399	Q18399	MCRFLVALLFTAISVYAGAPTAEEAKAEVVAAGVSEAAADGILKIAETYKGQFEAAKGDREAGKNVFHTFHAEVDKYMETQSEDDQIAYKAFVDKKKAELQKRNSTPKA	109				flat	NA	NA								Glia			SS			16.5138		0	21	0	109	19.2661	0	19.2661		0.0239		-32.51		40.5183	43.4169	6.0452	48.3026	87.4011	66.7281
5275	5337	WBGene00017376	F11C7.2			F11C7.2	Q19349	Q19349	MKSVVIFLTFLATTALAGTWTDWGAWADTCVNCPGATYRGRSRVCIPGADMSGCTGDRLEKEICNCPLEAEWGEWEEWAACDNECGFCGTHARTRTCELLPECPLALCTGDDNESEPCSDTDKVCLAPSPSCCNGYKKKVDIPTKRFYCGLD	152				flat	NA	NA								Glia			SS			30.9211		0	3	0	152	1.97368	0	1.97368		0.0521		-34.181		49.8428	32.9894	26.2442	73.4169	70.8843	79.8772
5650	5712	WBGene00017613	F20A1.1			F20A1.1	Q19615	Q19615	MCKLFVAVALLAVVYAHQMPSADEMKAKLVEGGVSEAAAAGLVEIGDKYKSQFQALTKGDHEAGKKVFDSMKSESDAYIATQSEADQTAYKAFVEKAKEHFQAHKEAAAAESA	113				flat	NA	NA			1.22927	2.50555	0.013191	0		Glia			SS			40.708		0	22	0	113	19.469	0	19.469		0.0022		-28.305		51.862	49.9312	15.2395	49.4154	91.5942	65.1363
5651	5713	WBGene00017621	F20A1.10			F20A1.10	Q19616	Q19616	MCKLFVAVALLAVAIYAAPPVPPSAEEVKAQLVAAGLSETSAAGIVEVAEKYKTQLEALKDNKDDKEAIKKVFEEIKTDTDAYIKTQPEADQKAYATYIESKKKEFEGHHSTPAH	115				flat	NA	NA			1.71524	2.39176	0.000472821	0		Glia			SS			21.7391		0	23	0	115	20	0	20		0.1375		-37.026		33.7583	35.5072	9.85753	40.6141	75.0725	60.5625
7072	7133	WBGene00018692	F52E1.2			F52E1.2	Q20665	Q20665	MPTSLAFLIVLLVSTVNSLDLNDIKKIKTNPTTISTTTLLTTTTPEYVTFTIVDPGAMLIDCPGGCPTGWQYLNSKCYKKFDAAVTYAGATSACAAQGAELVTIDSFDENDALRKAFDTNALVDETKETWIGLKSLSGAWQWADGSSATYTNWAPSQPSSNGLCVQMITDSLSNATYKYQRGGWKTYGCGKTSASYICEKGASA	204				flat	NA	NA								Glia			SS			19.6078		0	18	0	204	8.82353	0	8.82353		0.0691		-8.893		29.973	39.0248	15.2395	40.6141	76.4849	44.8514
12191	12221	WBGene00018696	pho-6			F52E1.8	Q20662	Q20662	MRFIIYLLSLFSLGSTANLIIMQAIWRHGDRAPGDLPYPKDKYNETFWPRGWDQLTNKGIWQAVELGIWLRQRYGATVLPIFDKDKVFILSSDSERAIETAQGVSAGLFPPVDDRVWESSYLRYWQPTPIQTAYGTIDALLRPTKVKCPNYDLANEQEEAPIATQINNEYGQMFNWLQNITGMESIDFWNINDLYDIQRELDHNMPQPQWLNQVFNGTTIMDHIRELKRITRNQEFNSPTKAKFRGGMLVNQFLQNMEDLKANKTTKNAMMYSSHDGTLSALLYALNVSNDQLVPYTATVLFELYDDNTVQLFYKNTTSTAYPMTIPGCQQICPYSQFLQLLENVRVRSLDALYSLCGTYSSSTTSTTRATG	372				flat	NA	NA			2.40266	3.3799	0.000517241	0		Glia			SS			2.15054		0	30	0	372	8.06452	0	8.06452		0.0153		-8.357		20.4274	51.8226	9.85753	46.2073	44.1538	44.1489
3967	4029	WBGene00018861	cutl-21			F55A4.10	Q95Q52	Q95Q52	MRSIILIILVCSISFCSGQVIIAKNTQVTPRCGSQLISIEVNFDPTQLPGGKFTDWIIVGVSGRPECRLRGNGETKYIIEIAVFNDPCLTQIPARNVFQNRIRIGKNPVVILEEDQSVTVKCIYGLPTVETMTLPIINSNFNIDNFGHPEAEIRTTSSNSSDLSSSISQSRASLSVDESTKESMHQSFENSESIDSNQRATQVRDSSNFGGTPNLLPTQGFNSEQFAATTLRNGQNMNGNWEANRNTNAPNNFQVETGNDEAINGNSMGSVPGMGNSFNNFDTLNTGQSSKKRSFSMIFITAVILIVLVFLALLGFCLMFLRRKLASRNRRLLVDRVSDRTWPANTSNDEYGTTSPPPVAAKPKHFDNRLESHNTSVGRHLFRSPAARNFPDLSIVIKS…	633				flat	NA	NA								Glia			SS			8.05687		1	419	374	633	7.109	59.0837	66.1927		0.8964		11.293		80.0983	82.8666	71.8939	70.985	22.1125	19.774
7618	7679	WBGene00019090	F59A7.2			F59A7.2	O16281	O16281	MLLNSLLYTTVIFALVWGYPGHHTDHLEGCPLNLTHLHENMTMEHPPRNETRTRRGLDNDIENAGESAVNSVENAGKSAWETAGELGDSGVHTVENAGASVKNGAENLFHEVEAAI	116				flat	NA	NA			2.35728	4.83511	0.000139134	0		Glia			SS			0		1	69	51	116	15.5172	43.9655	59.4828		0.1171		-22.64		46.7183	34.2913	9.85753	73.4169	77.7499	77.6026
7619	7680	WBGene00019092	F59A7.5			F59A7.5	O16279, A0A0K3AVN2, A0A0K3AS56, H2L093	A0A0K3AS56	MRQIATAICLFLVVLTKHSIGAQNDTLEMELESNITVVKLEHGLKFQAHSEFGLPDNMTDLFNSTAADSEGVRIEIRQTIILRNRNKTGANNSSVLEAPRVKRSNKNASSSGSEENDQKDGQEDHHRKKKGATKKKVTTKKKKVTTKKPKKTTKKKLTTKKLATTTTRSTTKHRQFPDQRPPLQPVTEQKPGYPDDRHQTTTRRKFVMYDDEEKEAEKKDPEKEDKFNDSNSNWRSWKN	239				flat	NA	NA								Glia			SS			25.9414		1	144	115	239	12.1339	48.1172	60.251		0.8046		-16.989		78.0251	71.1938	62.3999	56.5291	66.5979	94.2054
9798	9857	WBGene00019563	K09C6.9			K09C6.9	O16945	O16945	MPRLLVLTTTVFAILGCALANNRAAVCQKAVNLGVTFYTAKEMEPILACADTHFYNDPKDPELVSKAKTCVINNSMNKAIAAMNLYSGFNGCTNLSDLVSKLATPFINLCKPVINKALSTLDTCKANNKQTGNAKQTACMNKVYTNCIAMVTKQFVNKVCTGLAKKMNAKEWNCCKTYVPKVADAKAYKCYSIEK	195				flat	NA	NA								Glia			SS			0		0	15	0	195	7.69231	0	7.69231		0.0248		-15.824		22.3852	41.2479	5.52198	30.0295	77.7499	47.2759
12890	12918	WBGene00020054	R13D7.2			R13D7.2	Q966G4	Q966G4	MFTQLYSLGLFLVFIPNHVDSEPIRSQTNSLECSEKDLLIMEGKCSRYVNEYTLLSEEYNLEDVTADIAKNMSYVCDRITNCFDEIPCDEAQKFKRIYEQKCEKDEFRNYKMTNCVNKLYDSIYLNSNNCSKAYQYFSKDLRVRREAYSSGESCIVDIAEAVCVEETALTYLNTKYDQFVDIMSIKPDSEHCTSLHDELFSRQCEPMIMKREKDQVLEQMNGLFSILRSSKKTEEEKQQVKCEDITECMKDACYNSHDSINKFEQSCSDKDNDSFDKCYRKLLTSPESIMYNCPNANSTKNSTVSLLDMLRLNRFSDNKECTRTLMAKICTPEAMKTFDKDWGDHQRRMAERN	353				flat	NA	NA								Glia			SS			0		0	23	0	353	6.51558	0	6.51558		0.1178		-22.144		33.0705	48.9266	43.9032	52.9452	31.9725	57.5903
15392	15412	WBGene00020155	T02B11.3			T02B11.3	H2L0C8	H2L0C8	MARLLSTLLLVSSISVVHVSAQANRAKVCEKAVNLGVTFYTASELQPILACIEPTLYNTPEDTTALIDKGKSCVISNSMSKAIPAMNLYSGFNSCTDLMALLDKMMTPFKNACKPVITKGLASLNTCKKNNKATGTAKQNACINKLYGDCMAMVTKQFVNKVCTALSKKMTAKEWNCCKQYAVKVVNVKGYACYNIVK	198				flat	NA	NA								Glia			SS			8.58586		0	18	0	198	9.09091	0	9.09091		0.0178		-19.537		25.3132	43.4169	11.6581	27.0572	79.0027	38.2633
15393	15413	WBGene00020156	T02B11.4			T02B11.4	O16973	O16973	MVRLLASVFLISTITLATVSAQANRAKVCQKAVNLGVTFYTAKELEPILACIEPTLYATPEDTDAIIAKGKSCVISNSMSKAIPAMNLYSGFNSCTDLMALIDKLMKPFMNQCKQVINKCLKVLNNCKANNKQTGVKKQNACMNKVWGQGIAMVTKQFVNKVCTALSKKMTAKEWNCCKTYAVKVVDVKPYKCYLIEK	198				flat	NA	NA								Glia			SS			0		0	19	0	198	9.59596	0	9.59596		0.0256		-15.834		27.2071	41.2479	11.0391	25.8069	72.2771	42.3753
15537	15557	WBGene00020248	T05C1.1			T05C1.1	Q22217	Q22217	MNKSLTLFLAILPATVLTLTCAVCEFKLLPPHDSECNGSCEGDVCFIVVNKYFNGTINAGCMHLREDDSFEDRAICHRGTYDNRCACSTFDNCNNPNVSISNYTFTESPVLENYQWVPQIQPPMPSIQPILPPKDIPIGGDLNETVTELENGVEDDLEKELDERTNATQILRNEENDDLLTVTTSVGLNIRDHTNRINTSSANNTSTSQQNVVVETSTTGTSFTPGHGSVEVTKVTQEASPPKLNPSNRNLTTDGTQNRDPNSTGSWKLFIVALIPILLKNLL	283				flat	NA	NA			2.127	4.01376	0.000380763	0		Glia			SS			10.9541		1	161	143	283	6.36042	50.53	56.8905		0.0392		-7.035		72.0658	70.7566	55.974	91.7956	39.6782	84.4412
16005	16025	WBGene00020589	T19H12.3			T19H12.3	Q8MPT1	Q8MPT1	MRHCTLALLVYAVGYVQSLVNVNVPSTLYYKVNDTAFIGLPVSANYRRTYFKAFEPEGGEQIYRVCNGKNKKTCGFWEDVKTKKKVASGVTTYNKKKKALVIKKMKASDFGNYMIGNKKKSRYVIEKISPIPI	133				flat	NA	NA								Glia			SS			9.02256		0	20	0	133	15.0376	0	15.0376		0.0298		-15.464		40.0688	23.1565	8.51388	44.1562	70.8843	68.4107
17984	17991	WBGene00021274	Y23H5B.3			Y23H5B.3	Q9N475	Q9N475	MSLTHFLFVFVSFSIAFSDDCDGHYDLEYGCNKLSLDLIRDWISNKPLPSVKAAQSLYSDCRRALSCTKSLNCDKKDNEISKKITDLDELCNGIGAFGSWFGYCIPKIQNAITLMEWPCLSHWNNAAQLPTCEYFEADNECKTMPIENICGPRAVKEMLDNENFIREYFGCNRIYKPSNNSSNSLKIKISGNPNSK	196				flat	NA	NA								Glia			SS			3.57143		0	31	0	196	15.8163	0	15.8163		0.0179		-21.899		34.1464	31.7367	22.4662	64.758	51.0366	62.0437
18336	18343	WBGene00021532	Y42G9A.2			Y42G9A.2	Q9N4Z4	Q9N4Z4	MQTLTLIFIFSVILTVFHVECATRAPKLSKHTKKTVNKLVNCLTPVDTVLAAKTADCEDSICVSSAKQYAQRRYPTQYHSTVVPCLSSTTTLAPVTEKMEKTKKNGTKNRKMKVEGVVNQE	121				flat	NA	NA								Glia			SS			0		2	117	94	121	19.0083	77.686	96.6942		0.0108		-24.319		41.4861	28.0619	16.0919	51.663	61.1373	71.7612
18344	18351	WBGene00021543	Y43B11AR.1			Y43B11AR.1	Q9N3X4	Q9N3X4	MKFGTSFLLVATISMIFAVVKAEDAAPAVVEASPAPVEPAVTGAVAGGDGNKEAGEEITGKSAGGSAVDVSTVVPVHSSDIPASSPTIETTTKSSTTFSAQLLAVAVLVLHAVRY	115				flat	NA	NA								Glia			SS			46.9565		1	86	66	115	17.3913	57.3913	74.7826		0.2738		-23.405		42.3778	32.9894	11.6581	43.2302	72.2771	55.4041
18876	18883	WBGene00021875	Y54G2A.10			Y54G2A.10	Q86FN9, Q95XX7	Q95XX7	MTRVIPILLLVALSVHVAQSQKIVAGALQKIFPYAAAAKVTALTTNLNKQTAIAKSKTVVKNWVPANWKAANAKPDAKNPLSKQAYAQNKALTFIDYRYSLVKYVNYLFKQGVSSKFLTQAEANNMKKVFWAADVKAANNYTMTCGQFMMDAASLVKDSDKLMAEVQKNTNLFAKANPTDFTNLQWNL	188				flat	NA	NA								Glia			SS			10.6383		0	12	0	188	6.38298	0	6.38298		0.0026		-13.548		27.5952	64.0776	3.10243	27.0572	91.5942	41.098
18888	18895	WBGene00021894	Y54G2A.32			Y54G2A.32	Q95XX6	Q95XX6	MTRVISLFLLCSLSAYVASDQIVVGALQKIFPYAAAAKVKTLTTNVNKQTTIAKAKTAVKNWVPKNWKAANAKPDAKNQLSKQAYAQNKALTFIDYRYSLKKYINYLYNQAISTKYLTKAEANNMKTMFWAADTKANNNYTVTCQTFMMEAMQKIKKTPTIQDSVTDLTGKFAKANAKDYANLQWTL	187				flat	NA	NA								Glia			SS			0		0	11	0	187	5.88235	0	5.88235		0.0025		-11.203		24.4682	60.8008	3.10243	23.4463	88.17	41.7416
19043	19050	WBGene00021965	Y57G7A.1			Y57G7A.1	O76628	O76628	MHAKLLIFSIIFGIIESATIGKLLQVPDKDPTLKALVYKEALPKANQKLHDTVYWVPATTQFSARRITVMNQGKLYSTWTYDMLLQRSDCSSRSTPLADLPGCKANTSSPKTLCSVHTSLFDNDLGSAESEVYCTKS	137				flat	NA	NA								Glia			SS			0		0	6	0	137	4.37956	0	4.37956		0.0088		-20.454		42.3778	39.0248	22.4662	63.6281	65.2837	75.2665
19220	19227	WBGene00022093	Y69A2AR.22			Y69A2AR.22	Q95XI6	Q95XI6	MRPLHINLVAFLAVFVSVTVDAQYPVTYGCVAQILAYSPMNKLNTFVTNLNKDATLAAKKKRANSWVPNNLGSHKFPALDLYATSAKALEAVTGLLDHRNTVGLFWADLQPGLTKVYNASISKKYKNMWAKTDKIHDNAFFDALNEWYAYCHYNSPAGKRTALYNAIQKVTTKYANNTQLNYEVMSSAWYARFTVMMLFGSW	202				flat	NA	NA								Glia			SS			0		0	19	0	202	9.40594	0	9.40594		0.0021		-11.328		21.4517	50.8622	2.71678	31.5942	83.6527	46.0255
19367	19374	WBGene00022230	Y73B6A.3			Y73B6A.3	Q9N4E4	Q9N4E4	MVRVLLVAIALIALIVQVDSDSMPWRMIMAKPGDRVEIGYYNPKNITRFVKNAKGVGQEHVFRVCNGKNKTKCGFWENVKTKKKVEPKTTYNKKKNLLIIQKVSALDAGTYRTPEYDTVDLYIQTD	126				flat	NA	NA								Glia			SS			19.8413		0	18	0	126	14.2857	0	14.2857		0.0096		-24.441		42.8814	31.7367	11.0391	48.3026	49.8624	75.2665
19818	19825	WBGene00022657	ZK105.6			ZK105.6	Q965Z3	Q965Z3	MTNLFRNLAIFFTFFNFVFSAPFSAKGDVSTCLKIFYIAAYDDDNFECVKEFDFFSNNMTTQKSAFTAGKSCFFQIVKEQCSTPDYTLISSNYDTFVQEFTTPPKDDSNCSDTYYMYNQAKCEAMMSDVAQKTLKISKVDTKINDTRILKLVEQCKNVQTCMNSTCNAPDLDRRMADDMCEAIEMKNSPFMACQFKIHKERPDLSKYTCTDSIGSENENISVQIEAFTTKKDCTKSIMEGICGKSAVENFDQYAQISVKNLNKMASFMMQLRVQ	274				flat	NA	NA								Glia			SS			0		0	10	0	274	3.64964	0	3.64964		0.0071		-17.911		24.338	62.169	5.77254	24.6401	38.6441	57.5903
1924	1991	WBGene00023431	C25E10.13			C25E10.13	Q6ACW9	Q6ACW9	MHFKICFIFVTLGILMLLGVKAEVTPSLGELLGINAAPVSCEDVKCFGQNSCRTVAPPCIPGKTCPTQPLCSTQI	75				flat	NA	NA								Glia			SS			0		1	72	46	75	34.6667	61.3333	96		0.0198		-31.531		45.7431	13.1147	19.7494	78.0226	69.5185	83.7386
3413	3475	WBGene00023502	clec-184			F08G5.7	Q5WRN9	Q5WRN9	MFVWLIFSHFVIHTFCNTNDHIEDFLRNKTAEDIIGLRQQYHRAIYKKKKEESALADASQPNLVLADGAVLPCEAGWHQFPDTGCCYRVSDAESEWHGGTAICKALNPDAEMASFHSQAESIFVANKYSTIHAWTGLSQTEIPNTWTYTDGTPDWHWFPALAAAPSDADSSCVEMMDGLLGLIFALSLQKGQTNAYSCDESIQIICKYCPRETTSTTTVTPTTTKAATIKTSTTTVTPTTVTTTKAPTTTKTSTSTTTPKFTTTTIQTTKKITTSPTSTTASIPITCTSNCPVPAVNFKGLCYKMCRGLVKFEDSCTWCNGTMATISSGEENDFVSRVFGSNDETTRQIWIGNTESSGYLNWSQGQPTKPNDGLDYCISMDLSAGSTRGKYKYLPCQST…	409				flat	NA	NA								Glia			SS			21.2714		1	90	69	409	5.13447	16.8704	22.0049		0.1229		-15.069		18.4648	51.8226	27.2144	12.4048	25.5859	34.9619
9127	9186	WBGene00044303	hst-3.2			F52B10.2	Q4TTA0	Q4TTA0	MKYRLLLILHLIDLISCGVIPNTSKKRFPDAIIVGVKKSGTRALLEFLRVNPLIKAPGPEVHFFDKNFNKGLEWYREQMPETKFGEVTIEKSPAYFHSKMAPERIKSLNPNTKIIIVVRDPVTRAISDYTQSSSKRKRVGLMPSFETMAVGNCANWLRTNCTTKTRGVNAGWGAIRIGVYHKHMKRWLDHFPIENIHIVDGEKLISNPADEISATEKFLGLKPVAKPEKFGVDPIKKFPCIKNEDGKLHCLGKTKGRHHPDVEPSVLKTLREFYGPENKKFYQMINHWFDW	291				flat	NA	NA								Glia			SS			3.78007		0	22	0	291	7.56014	0	7.56014		0.1695		-21.003		37.1113	25.6988	22.4662	33.1344	29.3712	73.5986
18631	18638	WBGene00044376	Y49F6B.12			Y49F6B.12	Q4W5S8	Q4W5S8	MSSFFCALLAILVISGALSAETDMVQQGKMGGQDGMHREGMDGGQGMPRSQEGQMGESGRGMPTGQEGQAGMGKNNGMSGMNGMNSNGQGMPEEKENGKSGMERGNGMQQAEI	113				flat	NA	NA								Glia			SS			18.5841		1	113	113	113	0	100	100		0.3712		14.437		82.7561	45.8413	43.9032	95.7062	96.3719	88.3542
2023	2089	WBGene00044389	C27D6.12			C27D6.12	G4S3E4, Q4U219	G4S3E4	MLFRFFLLIVAILTIVNAGEPEHGAPPPNGTDMGNDTMLEARAGGPPMDGMNGTVVQENGNKTGGVMDWIKSKLGK	76				flat	NA	NA								Glia			SS			0		1	55	53	76	2.63158	69.7368	72.3684		0.0371		-12.518		58.6097	23.1565	23.4439	83.3579	77.7499	88.9364
576	643	WBGene00044582	B0222.11			B0222.11	Q4PIU5	Q4PIU5	MSRRTASKLLVFVFLCSLCFGTQRYDMPRKIDLFNDLITQSTTPASPKCQCLPPTTPSTPPNCIPYDSRLQAASLEEAIVAFPDLTITRQEKTQQSTATLNNCKTKQCRDCYKDLRSQLRKVGLLPGTIDQVFHNQRNFTTCQKYRFARQDKGVYEKKKKAKQHYDWDYVEYDEDEDDDYFWDGLFWKKKRNVLKKIVKRDVEATTAISQPPNSTAMNSTGIIGIRFPISCTTRGVTPDGLGTVSLCSTCWVWRRLPSTYYPAYLNEVVCDYADTSCLSGYASCQTGTQQLNVLRNDSGKLIPISVSAGINCECRLAVGSTLESLVLGQGISKAMPPIDTTSTKPPNLATSTTSHS	356				flat	NA	NA								Glia			SS			12.3596		1	149	83	356	18.5393	23.3146	41.8539		0.3458		-19.016		47.6075	64.0776	55.3967	58.9732	31.9725	61.3142
16248	16266	WBGene00044990	T25B9.11			T25B9.11	D3KFU5, Q09EF1	D3KFU5	MMIRFLILLILFCSCRKASAQSGLTAYESIRRLRECIDVIDKPEFKRTCEEKFGEERDECIEKFTKKIMPTLNACIVNSRESIVTIPNREEL	92				flat	NA	NA								Glia			SS			8.69565		0	28	0	92	30.4348	0	30.4348		0.0078		-51.683		38.1749	18.3837	16.0919	61.3854	58.3296	76.8558
2410	2476	WBGene00045390	C38C3.10			C38C3.10	A5A8Q8	A5A8Q8	MSSFQITLLFLTIGICLVSSQNGIPTSEESIDNLVSAGVSENAAAGIVKFDKKFQEPFEMEKTDPKGAKQLEQVLHKNFNEYIDNMSIDDQAAYQNFIKSQRT	103				flat	NA	NA								Glia			SS			0		0	21	0	103	20.3883	0	20.3883		0.0148		-23.882		52.7634	36.6863	12.3164	61.3854	82.6333	77.6026
12828	12856	WBGene00045517	R11D1.13			R11D1.13	A7LPH6	A7LPH6	MKFLILSFLLVSICSGGGGFPIQMLTKCGISKETIDGVQSVIDEHSAMIKIANSNKRAKKTEIDSLKADIDLYLDEHASDDDKKRWIECFTKNNS	95				flat	NA	NA								Glia			SS			0		0	18	0	95	18.9474	0	18.9474		0.0356		-32.616		46.2122	28.0619	19.7494	74.65	72.2771	74.4338
18166	18173	WBGene00077669	Y38H6A.5			Y38H6A.5	E3CTH6, E3CTH7	E3CTH6	MHYLPIILFSFLLLPRGATSIECYSGSQLQVINCPSMSCIKQTLGLDTVRYCDGTGVSSICQTYRIVETCDTIPNLGYICCCGGDLYAAKNQVTPEIRRQCLMKLASVCSIGETAEPIRQKVEELKAFQISIIMLPPSSRTEEESLQKSK	150				flat	NA	NA								Glia			SS			8		0	28	0	107	26.1682	0	26.1682		0.013		-25.692		39.1796	12.6701	25.3918	74.65	55.9445	55.4041
2995	3061	WBGene00000296	cat-2			B0432.5	P90986, S6FN11, S6FWP9	P90986	MFLRYMRRRGSGEDHEEEPRGVTVIATKVAENSKNPRRYSLVHQASCETQHHKGIRRQNTIQHRKQLTDQMRCQKILQQLNDEGIEVIFTANDVTPIEFSIILTSTDPTLSNFVSDILQNMSSAKVQICHVETRGNEASHDVLLACKATKNQLIHSAELLTQNHVALTKFSIFAKKLSDEKNQSQIWFPRHISELDQCSKCITKYEPTTDPRHPGHGDVAYIARRKFLNDQALEFKFGDEIGYVDYTEEEHATWKAVYEKLGDLHLSHTCAVYRQNLKILQEEKVLTADRIPQIRDVNKFLQKKTGFELRPCSGLLSARDFLASLAFRVFQTTTYLRHHKSPHHSPEPDLIHELLGHVPMFSDPLLAQMSQDIGLMSLGASDEHIEKLSTVYWFIVEFG…	524				flat	NA	NA								Glia						0		1	79	73	524	1.14504	13.9313	15.0763		0.0202		-17.296		19.0445	60.0197	37.5289	15.8413	17.8629	30.3414
12396	12425	WBGene00000448	pros-1			K12H4.1	P34522	P34522	MSSGLPSIAATAQPSANGFSFNNGFPPFGIYYSQLPPVNSNGSTPNSSNRFKVKRHRQRVDAGEPRNTYQGASTSVSSNSSSSSSTSNTNSTPSSSSTSSKKSTEGMTETETMTASIEQEKVIQNEESEAGKDGMEEHDDGMNDFEIIDDTNDEVEESEERESPESNSSSASKRKSFQPQKIGEELGIEFGDETEQINVTVGGTEEAEETTDEAEGRELSALQAQLQNGHIAEQQRRFYAAFLDQQRKQVAAAQILHNGKINIERLVSSVKGDLVTNFMKDLEKVIRDWAADEVLKQEAAAPPQIPQPPPQFHPIFPANPLFHMAPPHHPVAGGGIFPPNFNAFNAFNALRRNLQDVDTSSEMKKKRTKVEIKKEDAMSSRASPLSASASPPLSRFFPA…	594				flat	NA	NA								Glia						28.7879		2	436	434	594	0.3367	73.064	73.4007		0.9806		4.443		89.7249	93.1221	73.5053	85.5809	94.8858	57.5903
3150	3216	WBGene00000451	ceh-30			C33D12.7	Q22909	Q22909	MSLLDPRQFLLPAFYLDPTTQALLAQAASTSPCNKISSSSSFRISDILEQSPNNSSHSNDHDPSPQSIKSDFSTSPRASSPGGDRMGSPGSCKKSRKARTIFTDKQLQELENTFEKQKYLSVQDRMDLAHRMGLTDTQVKTWYQNRRTKWKRQATSGMDLLSEPGNLSAVQNLIRSSPYWANYITALPMGTQLPMMGLPMSMIVPPAHAFQPSSSSNSPSTHISSESPQLDVSSNSE	237				flat	NA	NA								Glia						23.2068		2	165	139	237	10.9705	58.6498	69.6203		0.5718		-1.12		82.594	78.9167	64.6622	86.2343	76.4849	88.9364
3151	3217	WBGene00000452	ceh-31			C33D12.1	Q22910	Q22910	MSMLDLRQFLIPAFFLDPTNQLAAQSSSGGAKINLNSSFRISDLLDPTSHSTNEPDPSPTSINSSESPSSPRIGSPNTERSVNESPTCVGSKKARKARTIFTDKQLQELENTFEKQKYLSVQDRMELAHRMGLTDTQVKTWYQNRRTKWKRQASVGMDLLHDAGNMAAVQQLLRTNPYWANYLSQNTSMFGASNNRPVFNSLVVPTSSMIPASNSQNSLLQFLASQNVKDDISSPKESPSVSPDSVKNASVSKKESDEDE	260				flat	NA	NA								Glia						7.69231		2	223	173	260	19.2308	66.5385	85.7692		0.8911		5.312		81.9234	81.4517	60.6387	83.3579	86.5831	70.0639
3161	3227	WBGene00000463	ceh-43			C28A5.4	Q18273, A0A1X7RBT1	Q18273	MDPSKGFEYVAGDYYQTSGVAPPTSNGAGSNVSPYFPYHAYPTSSTNGATGGSMYGTPQQTSAYAMYPPGPGSSPEEAFPEHTTTKIVEGCEAKYNVKGKKMRKPRTIYNSSQLQMLQKKFQKTQYLALPDRAALAHELGLSQTQVKIWFQNRRSKQKKQKGGSSDHASDEEDDDTEESKPESPPMGESVMIQESSEPRTLVSSSIKTEMKEEYPPMTLNEQYASPYLYGSDFSTILPPSQGFPNNALYNTAGAYPSIDYTNGVYQNTLYKYV	273				flat	NA	NA								Glia						11.3553		2	261	260	282	0.35461	92.1986	92.5532		0.9702		13.629		81.3338	72.0953	49.9312	80.7738	95.4409	72.6971
3302	3364	WBGene00000509	cka-1			C28D4.2	A0A061AIW1, O17610, B3GWD5	O17610	MFRLSSILVFHFLRRNLKTSSKFVRRMVSLEVPTESPCISRRAPSEECEIAFSHDDPTLMWKDRTTDCVDLKKVFSKFDSSAPISGEILFRARFLCAKYLGGAWRKVKIEEFRIRAITGGMSNLLFLVELPAHLTPIQMEPEKALLRVHCQSDIDQLLSESVVFTLLSERNLGPKMLGVFPGGRFEQFIPSRALQCLEISKPGLSKLIAPIVARVHTLDAPIPKEPQTLQTARQWLERFKKTPAGERPIEMYLTQAKVPKSDYPSTITVAQLERELNFVEFFLQHSHSPVVFSHNDLQEGNFLLIDGYKLADDGTVLTPDGKPTNDDPLSLIDFEYCSYNYRGFDLGNHFCEYGYDYNEAEAPYYKIHQHYFEVEKERKVFCEAYLDEVYKMRACGDNP…	474				flat	NA	NA								Glia						0		1	54	42	448	2.67857	9.375	12.0536		0.0029		-22.451		23.1049	40.1646	37.5289	39.7568	15.7701	49.0346
3757	3819	WBGene00000630	col-53			M01A12.1	E5QCF2	E5QCF2	MSYIWRQLGSPTVAITLSVSTVIYVTVICPIVFIHLFGDHLNVLEDDECPIQMSDLRQRVSFVREQIHENTRKKRELASCCIGPPGMKGFPGKNSRDGYDGEPGRDGQPGRPADGDSRMVCIRECPTGRPGREGGDGPKGSKGQRGRTGQQGDSAPPSIRGEPGERGDKGFPGVAGPAGEPGEPGHIYVSDGPPGKDGETGPRGPPGEKGRTGRDGEDGLPGERGERGYQGLKGEIGKRGPVGTFGPIGPKGEPWPCESCPPPRVSPGYYVNKRNKKH	278				flat	NA	NA								Glia		collagen				5.7554		1	247	238	278	3.23741	85.6115	88.8489		0.3152		-11.97		91.5672	29.2533	67.1457	98.6834	64.0334	98.7079
4283	4345	WBGene00000934	dat-1			T23G5.5	Q03614	Q03614	MQLVPTDDPDEKIGRTSNGMQNATLPIDGPVNTEPKDPAREQWSGKLDFLLSVVGFAVDLGNIWRFPYLCFKNGGGVFLIPYSIMVLLTGVPLFYMELCLGQYYRKGAITTWGRICPLFKGIGYCVILTAFYVDFFYNVILAWGLHYLYTSFSFNLPWASCNNSYNSPACYEPHWSEDGTAMCRSANQSVSAEKISAAEEYFYKGFLGLHEANAPNSHVIRSVTDLGNVRWDIALSLFVVYLICYFSMWKGIHTSGKVVWFTALFPYVVLGILFIRGVTLPGWQNGIEYYLRPNFEMLKRPSVWQDAATQVFFSLGPGFGVLMAYSSYNDFHNNVYVDALFTSFINCATSFLSGFVIFSVLGYMSCKSGKPIEAVAQEGPGLVFVVYPEALSTMPYAPF…	615				flat	NA	NA			3.70363	3.47787	7.79487e-05	0		Glia						0		1	63	40	615	3.73984	6.50407	10.2439		0.1248		-11.691		2.25006	1.71702	0.189143	7.66151	15.3279	14.1145
4803	4865	WBGene00001193	egl-26			C23H3.1	P91082, A0A0K3AWT5	P91082	MLTCIQPSSSSIGGFGKADDNVRILLMASVRNEFGDTSIFSRLGVTALGQHYVLVTKKKMFGGYTTHMITANMRNRPFISIPFKVSSGAQSIEESRDLISRLTTVLGRPGMFSFDDPPIGSQFPVGKELIQLDEVPVGVHDRQDKYLEKGDEVFCEVNVSGVKFYHSGIYAGDGMCYHFVCDAQESESFADALAVFSGASAHVVYDTWFEFVYALVEVSDVPPKIFRASHPLICRSGEQVVKYAEHLQRELENYDIRRCNCQHFSSECSTGVPFSYDMTSNFKYLACTVLKPTSTVVNAMTRPNRDRSSFASSSTSS	317				flat	NA	NA								Glia						3.16456		0	40	0	317	12.6183	0	12.6183		0.3067		-16.734		42.1493	22.0437	35.7013	57.7598	45.1904	39.3196
4808	4870	WBGene00001204	egl-38			C04G2.7	G5ED14	G5ED14	MEPIWRNYPYPTYPGHHNFQFDPLLSDGSHTGVNQLGGVFVNGRPLADTVRAQIVEMSQHGTRPCDISRQLKVSHGCVSKILGRYYSTGSVRPGVIGGSKPKVATPRVVECIAGYKRANPTMFAWEIRQKLIEDQICGEENVPSVSSINRIVRNKSFMAQLAAPTSVTSSAARPSSATSHHQRSPPRGVQQHMQQSTSVQQLQQLQLTSAATVNSLMTPPAFAMPGTAYSINGLLGTLPQPSLLDDKFTNLSTQSADMSLVYSTGLVGEHDWTMRTPMVILPQNYCGQL	289				flat	NA	NA								Glia						14.8789		1	149	136	289	4.49827	47.0588	51.5571		0.2801		6.948		71.2331	64.7187	51.1349	84.8882	57.1088	42.3753
8449	8509	WBGene00001623	glt-5			Y53C12A.2	O18210	O18210	MGIASKKSVSRWTSWLTKNMLLLMTMAGIVMGVIIGGVLRTADPSPDVIRYVGFPGELFMNMLKAMVLPLIAASIVSGLSQLDGKTSGRLGSRAVMYYAITTTHAVILGIIVVSIIQPGDPTIKQKMGYDKEGEAANVSAAQKFLDLFRNAFPENIMRATFSQVQTNYINQTHSNGATHEVLHTGYVDGMNVLGIIVFCIVMGLVVSRIGEEAKALANLFHALDVVITRMVMLIMWLGPIGIPSLIAQKMLEVSDLWLTARMLGLFVFTVILGLAIQAFITLPLIYFIGTRHNPYTFLKGLGQAIMTALGTSSSAASLPVTFRCLNKLGIDPRVTKFVLPVGAMVNMDGTALYEATASIFIAQMNGLELSIGQIVTVSITATLASIGAASIPSAGLVTM…	491				flat	NA	NA			6.41029	4.61037	4.55129e-05	0		Glia						9.5723		1	57	37	491	4.07332	7.53564	11.609		0.0113		-8.241		4.28887	5.37706	7.33972	10.4888	38.6441	9.06411
8635	8694	WBGene00001776	gst-28			Y53F4B.31	Q9NAB2	Q9NAB2	MPTYKLTYFNARGYAEAARILFHLADVPFEDFRMTHGDGTWEKLKDGAPFGQVPYLTVDGFDIPQSAAIIRYLANKFGYAGKTPEEQVWADAIVDQFKDFMGSFRERIMAHFAGKSQEEIAKITSEVVIPARDSYFKILNGLLEKSKSGFLVGDSITFADIVISENITTLEKNQLFVASEQPNLAALREKVYAIPAIRKWVEARPDTQY	209				flat	NA	NA			1.52153	1.70325	0.00360217	0.000600377		Glia						0		0	4	0	209	1.91388	0	1.91388		0.0031		-23.606		21.6704	28.0619	3.27684	42.3409	55.9445	49.0346
8641	8700	WBGene00001781	gst-33			C02A12.1	O16198	O16198	MTKYRLHYFNARGYAEASRAMFHMAGVEFEDVRYEIDDWIKEENTLKNEMPFGQMPVLEVDGEKIPQSVAIARFVANQLGFAGQTPVEKAWADAFTDLYKDFLIDMKPWAMIAFGYPGAAGDRDELKKTSLDPAKEKYFKLLSKRLEKSKSGFLLDSGISFPDLFFFETTTSLIELEKGFLGTDFPVVNAYFKRIAEHPKLKPYLETRPYSSK	213				flat	NA	NA								Glia						5.6338		0	4	0	213	1.87793	0	1.87793		0.0024		-25.672		33.2474	39.0248	14.4461	46.2073	64.0334	71.7612
8643	8702	WBGene00001783	gst-35			Y1H11.2	Q8T7Z3	Q8T7Z3	MPSYKLTYFDIRAFAEPARMLFHLGGVPFEDARMPTDDIVPGIQSDQFLALKEKTPFGRFPILEFDGFKIAQSAAIQRYLARKFGFAGKTPEEEAYADSIVDQMKEYIESFRPVLYAQKSGKPEEEVKKIHDDVYIPAKNNLIKILNRLLKDNKSGFLVGNGLTYADLVVADHMFTLSNIKELDSEDPTHKILKDFQEKIYGLPELKDYIKNRPERDM	218				flat	NA	NA								Glia						7.33945		0	4	0	218	1.83486	0	1.83486		0.0028		-27.656		28.4525	42.3041	15.2395	38.8406	37.6345	71.7612
8644	8703	WBGene00001784	gst-36			R07B1.4	Q09607	Q09607	MPHFKFYYFDVRGRGEAIRLLFHLADEKFDDERFGMEQWGVLKSEMPLGQVPVLEIDGVKISQTTAIARYLGHQFHRAGTNAVDCARLDMIAEVIQEFMSSSGMGKFSRVLLGMIQANKEQFFKENVLPDVEKYAPIVEKFLLENGNNGLLLGDRETWVDVFAAESFSKLIDYGSPDALDAYPHILALINRVFNHPNIKKYVSQRKATPA	210				flat	NA	NA								Glia						5.71429		0	5	0	210	2.38095	0	2.38095		0.0021		-18.407		32.3803	50.8622	12.3164	45.1511	49.8624	58.9929
10248	10306	WBGene00003012	lin-26			F18A1.2	Q27355, A0A2C9C321, U4PC59, U4PFD0	Q27355	MLSKFVVVEVSNSNNTMTLVEYLVTHGFDKFAVVTDLVDHPSFKYKDGSSSPESPSTTASTAAQHTPPRTAVSTPTSINTPVPPHQNKQRHSIDKIAANLSTKKVSPSSIEKQLQRTSHNPLHQLSTPHALSQLQKLLEEQHKINQMNIQKKEQERQQAEIQRILLQQANAAQINHSFGLERLTPEYDDNHHSETISKASSEDLKTEPDSTDFGLGTSDDQVRASMLHLLHPVFAPAFGMLDAENIFGAASKPTTPASKRRNTDSNGAPSKKHRWLPVNELEESRSSRGKNCGRVHCKATYKCALCGKPTTLNSTGSRWNLLRHVIMIHSDCKPYKCWDCDFTGIKSNVISHARQCRHNAEDAHDITTDEMRAEWNLRLHECFPDYVRAKERGWQPEEV…	438				flat	NA	NA								Glia						10.9589		2	312	303	472	1.90678	64.1949	66.1017		0.982		-9.714		62.7364	80.8671	65.5736	33.1344	24.8489	61.3142
10266	10324	WBGene00003033	lin-48			F34D10.5	G5EDU6	G5EDU6	MDSRVWLPLIGAHLLPRDISVITQMIANNNNTSISRSSTNSSKPEEKNSKKFLIERFLDDDPSPPASILSPSPKAAIPSPIINPAVEFVNGGYGVKNPLAPLISSFETTSIPCSTVSPSSLISSSKDEFQDSLTCHICGKKFGLQRLLNRHIKCHSDLKRYLCTFCGKGFNDTFDLKRHTRTHTGVRPYKCEQCEKSFTQRCSLESHLRKVHGVTHQYAYKERRSKVFVCEDCGYTDEKFEVYLSHIKVVHPFSAAYLRFTQLQKKNSSMKPEQLSKISL	280				flat	NA	NA			1.80833	4.70484	0.00389704	0		Glia						21.4286		1	151	129	280	7.85714	46.0714	53.9286		0.4235		-17.946		66.3031	44.6156	60.1105	51.663	33.8467	79.0862
10304	10362	WBGene00003044	lir-1			F18A1.3	H2KYA2, U4PS83, U4PMZ1, U4PS88, U4PFD5, U4PFE1, U4PCJ3, Q27GT8, U4PC65, Q9Y050, Q8I7K9, U4PMY5, U4PCI9, G5EBR0	G5EBR0	MPKFVVIELNDDAATIDLLSYCVKKNFERVSLLTRLEDHPYLRDDQDVVQDDTQSQGTDGMLLQLNDEERQRLMKMISTPGPQTLSMERIQMAPGQGQHILQQHQIPSTSSYTNNSFIYIKSDPQYKDEPQQQSNQFDATVNSVAHGQAGLSTLEMFACNGSPNGGDVLRRKTPSRKAEDSIKATCKVCGHDVMYSPQRTWNLMRHVWIMHQSSKPNQCSICGYSHIKPYVRKHIESQHKHDSNATIIDLKSPELEAEWSQLLDQCFGVTYRKWKHHKEDTQHTGGLLFDDDELRG	296				flat	NA	NA								Glia						10.473		1	169	145	296	8.10811	48.9865	57.0946		0.5679		7.055		64.0236	63.4807	53.6649	68.3911	52.2034	77.6026
11524	11568	WBGene00003657	nhr-67			C08F8.8	Q9XVV3	Q9XVV3	MMTAVSQMSVPSSRILLDVDCRVCEDHSSGKHYSIFSCDGCAGFFKRSIRRHRQYVCKNKGSPSEGQCKVDKTHRNQCRACRLRKCLEIGMNKDAVQHERGPRNSSLRRQQMMFDHGSSPNSPEMGSESDAIILPTSSMNRDTVAGTAARIFFALVGFCQNPLNGVPKERQMTMFQQNWAALLVLHATETRAITSKQIRTETISGSSEQRNAVANAFEIIERLQLDNREYMMLKHFTMWRDTPSAIQIVFQLASIQNFTHRTEPTRYIQCINAIAAIPTTSIIDVLFRPSIGSASMPRLIQDMFKPPQQPTPTSLFPMANFNLNFLLKQEKTETEEGEDIEEEDDATSSNQFDENSSTDDRSVGELDPVQLFLALNSSTQPSSASSPSSSRPRHSIRSI…	416				flat	NA	NA								Glia						9.61538		3	129	115	416	3.36538	27.6442	31.0096		0.5947		-9.508		70.8818	66.4456	44.6131	69.6536	34.8219	55.4041
12998	13026	WBGene00004311	ras-2			F17C8.4	G5EGA7	G5EGA7	MSNGGKRPPEDDSKLPYYKLVVIGDGGVGKSSLTIQFFQKQFVDYYDPTIEDQYIQHCEIDGNWVIMDVLDTAGQEEFSAMREQYIRGGRGFLLVFSVTERKSFEEAHKLYNQVLRVKDRSEYPVLLVANKVDLINQRVVSEQEGRELAAQLKLMYIETSAKEPPVNVDAAFHELVRIVRSFPSDEGDHEASMASVPRTKKRKDKGKCLIS	211				flat	NA	NA								Glia						0		0	40	0	211	18.9573	0	18.9573		0.0078		-25.367		33.5937	41.2479	20.6436	51.663	40.7369	55.4041
13143	13170	WBGene00004401	rom-2			C48B4.2	P34356	P34356	MDDKWRESAPVNDIEASSWIRIFRAFDTDHDGLIQCEEMQKTIRDSTYSFGFDHYELQKMSLYLEMREGKPVDFADFCYLMSKCKGYRLREYLFRAALTVTPKNQRIHVFSELQRYKCVPPPIFLIFLSIVQLAFYLYYVVDSSEGVWLSGPIPTMSPLIVSQYHLPELWRLFTYCLINVGIFHIIFNILIQLAIGVPLELVHRWRIYILYFMGVLFGSILSLALDPTVFLCGGAAGSFSLIASHITTIATNFKEMENATCRLPILIVFAALDYVLAVYQRFFAPRIDKVSMYGHLGGLVAGILFTFILFRGSKPSRFYTVSFWVSLVLSGFFIAICITLIAAPRTTVQEIIKNQSFKNNATRCSVQIGINCISWTSNFLIFDHIFHVSYSHVLLISNA…	435				flat	NA	NA			1.28965	2.53581	0.00585973	0		Glia						0		0	12	0	435	2.75862	0	2.75862		0.0235		-14.1		2.99681	1.31172	3.27684	12.4048	11.6679	17.8507
48	118	WBGene00006522	abcx-1			C56E6.1	D7SFK1	D7SFK1	MSSEDVRIETPEDDESSGRDSIYFSTIRSRHAEHFFADMQNHNTQNEKKGIIRYLEYYEINSQSTRPYPNLLLNKLSFSKDLRSSSDKVLLRLPVLKQEVHNISFELSSSDVLAIMYTKESETISLLKIICGIKDVRGKLSGDILVNGHRMSRDRLEKTIGFVSLESPTSTLSVRQYLHVHGNFYPPMTERYGGVGHLINKLMTDLGLFPVSDIICSRLNRSQWQRVKVASQLVRDPTILVCSDIFKDIDVHDQCFLIDYLREWAVKTNRIVIMAISPTSLQILNMFSKAMILASGRMIYFGPPKSMQQYFETIGCPCPPYKNVCDYYVDLVTHDNLTSDASRESSVRIARLVNKWNQTAPPVRRTASGKFLLDLPTAGIFMNLLTLISLFWFNFINNR…	710				flat	NA	NA								Glia						10.2817		1	65	49	710	2.25352	6.90141	9.15493		0.2612		-15.022		8.20192	5.01105	32.96	24.0776	4.7605	39.3196
16803	16815	WBGene00006649	tth-1			F08F1.8	O17389	O17389	MAAVTELPKMNQELAGAVREGLELKKVETTEKNVLPTKEDVAEEKQHVERIHEIEHFDSTKLHSTPVKEKIVLPSADDIKQEKQHLELTDKINNFPSENLKKTETIEKNVLPSPTDVAREKTLQMAASFDKSALHHVETIVSTDVRVTEAQ	151				flat	NA	NA			1.32021	2.99606	0.0153705	0		Glia						0		2	128	117	151	7.28477	77.4834	84.7682		0.0442		-34.919		50.818	47.9833	38.3616	52.9452	70.8843	72.6971
16872	16883	WBGene00006652	ttx-1			Y113G7A.6	Q9U2Z0, A0A168HA93, B5QSI6, Q9U2Y9	Q9U2Z0	MSLTSSSAPSDSIVELIQSQNLSGSGSGTGGNTGSTTMNSGNFIPTPSLTGTGASQSSGSASSGNFVSPDETDTKPSPSLMDHNDPTSSLSQQLAQGATLTSPYSTTTVDPSSLYFQLSPMSYIPNVSSATTVAAANMSAYFNQKSAYPTSHLGFPSNVGSHSFLQSNMYIPSSLSDCPTATMGSMSWNANQPGFSRKQRRERTTFTRNQLEILESYFVKTRYPDIFMREDMAHKIQLPESRVQVWFKNRRAKARQQKKTLAPSNSGVTCSGNNGSTGGGSSNGSTGSEVQPSSPATTDSELKFSEVIKEECDEQSISPSADDQKGVNSYINPISSSSGTTSYNGTSSFRPQAQYPYASYPAYDFQYSQSNTNSTNTYTLDGNSTWKFQMS	391				flat	NA	NA								Glia						28.9003		3	299	298	391	0.255754	76.2148	76.4706		0.9872		11.815		92.7315	89.0641	75.2935	94.397	98.2682	73.5986
16897	16908	WBGene00006678	twk-25			M04B2.5	I2HAI4, G5EG92	G5EG92	MQAMEAFPSHFEQNLLKESSHLYSEPSTSKHLTPIPMPRSPTQPLRATSLFSNEIRRLKLQSEDINEESESCSSTSPKSSVGGNSDSSNPQVASHSGEYKNSDVKQPTTLRRKSAEAEDARSTSLTESENIGRTRTGSMSEDHKKPFKSILRNSPYLSKEDISQSNESTANRQFLKNRASSLTRKEKDIYNDRTEPGNNDVIDNYYAKNYYTVTGIYQKNTNFPRYAGYGGDNDDDDEAVRRNYNTTNSKKTMSMAQSTRSVPIVPVNNRFHKSFYWFAHNHKKIGFRHVCMLLLVLLYTLLGAALFFSIESRHEHETMHFHKRKLDRIIYEIAQTLELEVLDPMKLTNITQMEYFITRAYVKLLNAEDLYSGSTFYKHEDPKNLKWTYGSAFFFSMNV…	683				flat	NA	NA								Glia						5.56369		3	366	366	683	0	53.5871	53.5871		0.3845		-3.328		54.8784	72.0953	58.6269	36.2024	21.4468	27.9833
17240	17250	WBGene00006914	vha-5			F35H10.4	G5EEK9	G5EEK9	MGSLSRSEEMRFCQLIVEKDAAFNIVAEIGKQPYVQFKDLNPNVNSFQRTFVKDIRRYDEMERKLRFLESQIVKDEIVIPGRVDTGDYTILPTSELNTLEGTLTELEKDVKSMNDSDSQLKANFMDLKEWDAVLDKTDEFFQGGVDDQAQEELENLDEEGAVPRVEKGPVNYLVGIIRRERLNGFERVLWRACHHTAYIRSSDIEEELEDPGTGEKVHKSVFIIFLKGDRMRSIVEKVCDGFKAKLFKNCPKTFKERQSARNDVRARIQDLQTVLGQTREHRFRVLQAAANNHHQWLKQVRMIKTVFHMLNLFTFDGIGRFFVGECWIPLKHVEDVRKAIEVGAERSGSSVKPVLNILETSVTPPTYNETNKFTAVFQGIVDSYGIATYRELNPAPYTI…	873				flat	NA	NA								Glia						5.72738		1	77	45	873	3.66552	5.15464	8.82016		0.243		-17.063		2.99681	4.64505	6.61263	4.70892	5.61287	8.52862
529	596	WBGene00007104	B0024.15			B0024.15	Q8MQG4	Q8MQG4	MNLCRKLWKYLLGLIILYVTVFLNLDRIRSYSTDAPIFEVTNSFSSKSHLSKDGSTNQFYHAQFKDQNHTYQFITVPKKQCSNNTKLQITILSTAGNFDIRQAIRETWANPNNSEHVANNDVRISFIISKTSNEFLNFALQKEIEKFDDMIVTDLYESYELLILKVHAILSYKQSHCQLADFQLKIDDDMAVDMDGLYRSLEDKKQASINGISGIIWKNSPPVREKKHRWYVPKTLYSEKFFPPYIDGPIYLIGKNAVPRMLEEAKNYNQWIIEDVFWTGVIGKALKIKQINWANHLLRYVIELIPSRLKCSKGGVPLIYAVHNMKGPQMIHDGYQKLKGVKCK	344				flat	NA	NA			1.63555	1.56843	0.0020873	0.000433623		Glia						0		1	55	55	344	0	15.9884	15.9884		0.0257		-7.342		17.3962	29.2533	11.0391	22.8101	26.2712	42.3753
634	701	WBGene00007138	B0285.6			B0285.6	P46556	P46556	MILIINNTFDIDQKGFYFEKKVNLKFQLSNDKLWHRSLEGKCAFVILTMSCYWVAEVVPLAVTSFIPMIALPFLGIVSIKEVAPKYFADTNIVFFNSLMLSLAVEECQLHKRIALKMLTYVGTRPHWLMAGFMIITSFISLWISDTACCALMAPIAYALLEEIMIPKMRPEEKENEIEVMKIFDKEDPEEKEKKKLDTSRLSVRDRGICKCMMLLVAHASLIGGTGTINSTGPNLIFRDNIEKNFPNEDHGISYLSWMAFAIPPMIFYMFSSWFIVQLQFLGPRHLMGMFREPTETEKQEEEVAKRAVWKSYDQLGPMTWAEKSTLVIFVLAVLSWVSSDPKVIPGWSDLFRKGYVTDSCSGLVAVFLLFIWPKKKPDFRIFRKDKSRPSVRQEPLIDW…	577				flat	NA	NA								Glia						3.98614		1	69	37	577	5.54593	6.41248	11.9584		0.0178		-16.486		2.23532	0.704986	1.94056	6.04028	5.8536	13.5741
2008	2074	WBGene00007758	C27A7.8			C27A7.8	Q7YTR6, B0M0N3	B0M0N3	MVAEAQTCSWATWGEWSTCSDTCGNCGTQQRTRTCTGASTTCTCSGDSSAQQVCAPAICRFPRTACCTGSPASVNGMFECA	81				flat	NA	NA								Glia						24.6914		0	2	0	96	2.08333	0	2.08333		0.3415		-18.609		54.8784	20.1204	27.2144	76.9418	88.17	72.6971
2262	2328	WBGene00007908	C34B4.3			C34B4.3	G5EC47	G5EC47	MRAWQIPRKVMNNAVEWRTSSLSAEDLFAGLSLILIAVFAISLYAIMMKIMKRQDKEIVGYRFLISAGCSDLLLLFNYGIWPGLTILFKSEIIPQSWRTWQQLYLDWAWFSMVSHYSVVSWSRWMAIRKPLNFRNQKRKTSYSLCALCYLVALILVLSTHFQSWYVTFYYEPSSYGMLAENFPLYLSGGQSALFLAIHIAAILPPIVFYGWSITLLYRRRATMLLVHQHSVQNTIETRLLMPCLINVVTFIIGQVLITVGTGEGKWAGYTVMVLFAANSALNPFLLLICSKTLRKQVLDLLGVAKIATFDKLETSTVYRNIHAVNKDYCSSKLVGPESGSRRFLSLPTFRSKEDLRSSGTPV	362				flat	NA	NA								Glia						4.14365		1	77	54	362	6.35359	14.9171	21.2707		0.005		-18.174		11.1349	6.17784	5.25424	27.777	36.7109	27.1457
4094	4156	WBGene00007913	cyp-36A1			C34B7.3	P90771	P90771	MLFAQLVILVIIVMLFLCRFANKLRGLPPGPTPWPFIGNTFQVPEDRIDLIINEFKKKYGGIFTLWLPFPTIVICDYDMLKRNIVKNGESFSGRPDTFIMDMLVQGNYGLFFMENNWWKAQRRFTTHIFRSLGVGQAGTQDTIASLASGLVEKIDGQKDKPIELRPLLVHVVGNVIHKHLFGFTREWNETEILDFHVAINDVLEHFTSPKTQLLDAWPWLAYLDKPLSLGIPRTTRANDAIIQNLEQALAKHKTGINYDEEPSSYMDAFLKEMKIRAAENALEDGFTEKQLIVAIYDLYSAGMETIIIVLRFAFLYLVNNPETQKRIHEELDRNVGRERQVVMDDQKHLPYTCAFLQEVYRLGYVLPVNFLRCTLTDVEDCEGYRLNAGTRVIAQFQSV…	493				flat	NA	NA								Glia						2.0284		0	20	0	493	4.0568	0	4.0568		0.0043		-14.992		11.5672	22.0437	12.3164	39.7568	7.84819	50.8892
2281	2347	WBGene00007931	C34D1.4			C34D1.4	H2L2D5, H2L2D4, Q18433	Q18433	MSLASSSSTNTTNGTSSNRDALSSSPSSSSSPSPSSSCLIKCFLMERHYRHLIFSLSLHTLIYLLLHMCFSPRDLAQAYLADVIVLLLAAFGTARNLPILIFPSVIVKFICFSLCAGVAMLSLSETSINMKTKEARMEFRRQRNYPEVVNIAFEDHPTVCIWIHAMAVIVALDLNIGLKAFYSSFDCMKKPVVEEEKPPSYTVCMTNSSQTTLPPTYEEALEARKKMQAQAFPTRKNQRNSGIFVV	246				flat	NA	NA			1.51824	2.5987	0.0492282	0		Glia						17.0732		1	56	35	246	8.53659	14.2276	22.7642		0.0795		-14.835		27.8629	21.0685	32.0757	35.3918	51.0366	53.4463
2316	2382	WBGene00007947	C35A5.3			C35A5.3	Q18472	Q18472	MKTHLWGNYYRYLILIVGFLCLASVCSNYIIINFTFICMKEDNSEMHLVNGTMRSIYDYTSDEKKYIMWAVGAGTIFGTIPTNWVVVKYGAKWPFLVAGLVSLFSTALIPIAAKTSLTLFLFLRVLQGLAYSTDFAAIGIMTVRWAPLKETAFFIALLTCFTGVASMITNSATGLICESSFGWQYSYYFHAFAGLLLFALWAWIYIDDPQDSKRISGKELGRIHKNKSAAHLDKNGDIPYWKIIKSPVILIVWLNAFFEMTAVIFFATYMPIYLHQVLKYSVQETGFYVAVILGFNIPLRLVSAAFSDRITFVSEKWKIIIFNTISVGVSGLTLALVGFIPSEENWKSFICIVMVMMFVAVNVGGFYKCAALHARQHAHVVIAAIQFTKCLALFSAPAV…	460				flat	NA	NA								Glia						2.82609		0	20	0	460	4.34783	0	4.34783		0.0821		-24.483		1.78335	0.677966	0.0147384	4.97175	15.3279	11.6605
2609	2675	WBGene00008116	C46E1.3											flat	NA	NA								Glia
6653	6714	WBGene00009636	F42F12.4			F42F12.4	Q20340	Q20340	MAYFMTDVTKENRQDECRFSPNKEATEEDLLRIGVECTKVNFDDEHVQEDLDRLIKKYDMNFHDEVHICRATMPNFDEKLDIFFEEHLHDDAELRVIKHGVGFFDVRTKDEAWIRIPVRRGDFVFLPAGIYHRFTTDPSEDVVALRLFRNNPKWTAFNRKADGDEQRVRQQYLNDISA	178				flat	NA	NA								Glia						0		0	16	0	178	8.98876	0	8.98876		0.0024		-24.909		39.8256	50.8622	10.4274	62.5522	35.7775	80.6706
7585	7646	WBGene00010288	F58H1.5			F58H1.5	Q21014	Q21014	MRACDCITEPPLFDLPPPPDPSLIWHLISDEKFEPAEQCSSNQFVSISDIGTIYDSEDTQQLAANILIAVAALSVLLLFFVCVAVIGRIRRRRRLNSDASKKMSSDSILTAGEHLWTYNSMKQPINGGPPAVLMYSNQSNAGSRLFHHTPTTMRSYVVGSGTPIMGSQHIPIRHSESTTLRLNPGDGCSAYHTVSVSRQNGCPPSEVYEEIAPIGTMGHVGYMTTRPNMGNMTPMNNMNNRMSLRKPPPTCRPPQPPQSPVPSDGSYEITRITGTSSDSPRDRQWNEDGRESGYGTAPSLQWKSPSGSARLEAEAAARAMTYV	323				flat	NA	NA			1.4666	1.64742	0.00265124	2.51286e-05		Glia						28.1734		1	174	100	323	22.9102	30.9598	53.87		0.472		1.558		79.7273	65.9469	51.1349	95.436	55.9445	70.9064
9577	9636	WBGene00010566	K04G2.7			K04G2.7	Q21226, B2D6N0	Q21226	MATTTSTSSPSTSSTSSSSNCRIEEGELEQKLFNVYNEEVKMCDSNGQSTQHIGDEWMRREIRRICGFDVSDRWINLFRKKHGIRYFSGRRHADKKDKTIILSALDVTKMKTTNFLKKRRILRTSRKEYADVDLQVNKEIVRRQNKGERLTNPWIKEYAQYVAYQLHPEIPDIAKFFDANWLYRFKRRYCVELKPRSPEENTRSTPQTTSNEDIKSSATSMEVVTSPNYLFPHHYFNLFDQNGCGASIVKQEPTREN	257				flat	NA	NA								Glia						6.61479		1	82	32	257	19.4553	12.4514	31.9066		0.4397		-16.382		53.2179	59.1697	34.7237	49.4154	35.7775	68.4107
15493	15513	WBGene00011436	T04F3.1			T04F3.1	G5EGD0, G5EE32	G5EE32	MMIAAPTSLSKNVEDGGNFSADSPPSLNSDDEQLDDAPFLSHQLSDDHESFSEKFLRNILTHDYQNLMPRRREKFVEITKTVTVTEIVNGAPDKHPSSCEVKVTNVSPAGPHPVNVSIKHLHEKWHSCEELDRSDNGEDLGKGTVIRIQETHKPFNCTQKKHQTNKFVYEDVINTKMESSTKSRQPPSANSTLFNRSSDNIIDLEFRHPILRETSEKKSERTEQKANGNNGTRRRFADLRKRVSTTTKTSVTETENVTTTRRSSSAHSTHSKRSSAKPEVHTLYYRKFVDEETKGADDDSSDSGSVIIYRDAVTRRSRSADPLQNSSPTMSPIAPPRKRLGREESLHYYRDDDEVIQEQSSTEKSRRVTVKSPEPGNTSVSMNDNVEGRNLTAGITSIS…	3460				flat	NA	NA			1.45536	1.49483	0.0139391	0.0157672		Glia						9.81432		8	2717	2440	3460	8.00578	70.5202	78.526		0.9467		-4.545		96.6789	99.6365	99.5824	0.486367	0.137558	0.663228
15886	15906	WBGene00011760	T13H5.6			T13H5.6	Q9U369	Q9U369	MSVRWLLSLLLATWTLLSIARLVFDLIGNLWVVVVFDFVQIVLLISGLFGATQKRRPLLYTLLSSNALSVTINVLIFLWYIGVFGEISRPYLSAGLPYSSSFFLRFTPYCDAEFDVIRKKWVQKQCLIPFYSVEASQAILHIIFAIVTSIFSILVIVELRKKPIRSNSQSINHYAQICASKVAKAPSSTNNSSSGYLNSQYDDLGSSREKVKVTEKKEVKGQFERNSKKKKKNPRPEMPAPDCAPCSSNRSSEEESNLEDVYTQPIKKKIMPLRRPDLEEENRGTNVTSLVSFDPKSATLLRIRQHLEAEPSDRDTPDYDMYERLRSRSSGHSEVAPASTIPLSSDYKSRNASQDSVPSMFAPMLNSPAPSSTTSGSSSRTSGASLAHKTHIVGKGGIS…	475				flat	NA	NA								Glia						16.2105		1	263	261	475	0.421053	54.9474	55.3684		0.8072		-5.794		68.5114	70.7566	73.2105	42.3409	39.6782	37.0818
868	935	WBGene00011868	best-18			T20G5.4	P34577, G3MTX5	P34577	MTVSYNQSVATSRPWTFLALIFRWRGSVWSAIWIQYSVWLGLYFLVSAIYRFILSAYQQQIFVRLVDYVNSRMSYVPLDWMLGFFIAGVLRRFWYLYDIIGFIDNIACSTATYIRGDSERAKQYRRNIIRYCELTQVLIFRDLSMKARKRFPTLDTVAAAGFMMPHEKANFDLIQYNYNKYFLPFNWAWALVYNARKEGLIEGDYYVTVISEDIKKFRTGLAWVCNYDWVPLPIIYPTIVCLAVHMYFFVGILARQYVKGSEIDPDMIDLVFPFMTSIQFVFYMGWLKVGEGLLNPWGEDPDDFETNMLIDRNLAMGLKIVDEGYDKTPRLEKDAFWDDTWVPLYSEASAHEKRYHQRQGSLAHIKIGRSVSQVRMVPRDGRRASIVKERIVNVKPGSG…	456				flat	NA	NA								Glia						1.75439		1	105	88	456	3.72807	19.2982	23.0263		0.0117		-20.714		8.40334	13.1147	0.213707	19.6807	9.46942	25.4557
17402	17410	WBGene00012226	W03G11.4			W03G11.4	G5EFR7	G5EFR7	MLDYKGILTNITGFAKTSFYVTLRRGSRNSTNTSVTSTSSASSSKQTEHERLSRDRELVRRHGRLSSSEEARNTAVMGREAREDGIYTEENGAGSPFVVVVSCYNLGEMVVEKSVELENKKMEEGQIPKKKRSRELNIPQRNMFAPDFVIRPDEDLPGFSPIDSEYDTDDDAFEAEELNHRKAPRHTQSMPPPLSGMNPDIPNEYDPVIGIIAIQGVRIPRSRPIDIVPNREPLFPFFGVNSDLQVMLITERMYDVFKERIHSKGKERMLTMMENLAMTLTCGQMCGRLVPVEMMDQTVYYYDYDTVSFLSREELINLLMLCEPDQIEDIMVASSFPSKFHRETPEQMLQRNKHYQHLMHRPQIFLRRTDYMSCSIDDEDFTFPYFESVDNEHNKRLTL…	454				flat	NA	NA			1.44606	3.91726	0.008544	0		Glia						6.1674		1	126	74	454	11.4537	16.2996	27.7533		0.0258		-15.526		56.0329	73.434	55.3967	70.985	10.5895	73.5986
17774	17781	WBGene00012423	Y10G11A.1			Y10G11A.1	Q95ZJ9, E4MYG2	Q95ZJ9	MVGSLKLDELLSLPQVHVKDIKSLTDKLQNIVSGGADQLMVISDFDFTLSRFADKSGNRCSSCYCVFDSAVGTNNPEWCRKFVGLYHKYGPIEHDHSLSIEEKVPFMEAWWQQSHGLIIQGGFKKQAIDDYVAHCNIQLRDNADIMMKKMTNHAVPFIIFSAGIGTIIEMYLRHKFGRVESNTHVVSNMMGFDDDGYVNSFSDPLIHVFCKNSSVMPADRTFSEQIEGRKNVILLGDSVGDAFMDVGVEEEQVSLKIGFVNHDADKLVDKYLNYFDIVLVDDQSMDIPNQILEAIYNNKNY	301				flat	NA	NA								Glia						0		0	4	0	301	1.3289	0	1.3289		0.084		-19.449		42.3778	57.3888	31.1815	65.9224	46.2786	50.8892
[truncated: 19,551 more rows]
[truncated: 91 more columns]
