# Supplementary material for: A spatiotemporal reconstruction of the C. elegans pharyngeal cuticle reveals a structure rich in phase-separating proteins
Source: eLife. 2022 Oct 19;11:e79396. doi: 10.7554/eLife.79396 (PMC9629831; doi:10.7554/eLife.79396)
Supplement: Figure 5—source data 1. [file elife-79396-fig5-data1.xlsx]

## Sheet: Fig 5C (Pharynx-SS PPIs)
# Organism: C. elegans
# Application version: 3.6.0
# Database version: 13 March 2017 00:00:00
# Network generated on: 28 December 2020
# Author: GeneMANIA (genemania.org)
# Notes: Network weight reflects the data source relevance for predicting the function of interest
Gene 1	Gene 2	Weight	Network group	Network	Comment
abu-1	pqn-2	0.555614	Physical Interactions	IREF-BIOGRID	abu-1 does not oscillate
abu-1	pqn-2	0.494317	Physical Interactions	IREF-INTACT	abu-1 does not oscillate
abu-1	pqn-2	0.496181	Physical Interactions	IREF-SMALL-SCALE-STUDIES	abu-1 does not oscillate
abu-1	pqn-2	0.506022	Physical Interactions	Lee-Marcotte-2010 Protein interactions	abu-1 does not oscillate
abu-1	pqn-2	0.535713	Physical Interactions	BIOGRID-SMALL-SCALE-STUDIES	abu-1 does not oscillate
abu-10	F30H5.3	0.14905	Physical Interactions	IREF-BIOGRID
abu-10	F30H5.3	0.148698	Physical Interactions	IREF-INTACT
abu-10	F30H5.3	0.149999	Physical Interactions	Li-Vidal-2004
abu-10	F30H5.3	0.146489	Physical Interactions	IREF-BIND
abu-10	F30H5.3	0.138512	Physical Interactions	IREF-DIP
abu-10	F30H5.3	0.388481	Physical Interactions	Lee-Marcotte-2010 Protein interactions
abu-10	F30H5.3	0.204887	Physical Interactions	Lee-Marcotte-2010 Y2H
abu-11	abu-1	0.0366265	Physical Interactions	IREF-BIOGRID	abu-1 does not oscillate
abu-11	abu-1	0.0276548	Physical Interactions	IREF-INTACT	abu-1 does not oscillate
abu-11	abu-1	0.0649189	Physical Interactions	Li-Vidal-2004	abu-1 does not oscillate
abu-11	abu-1	0.0468596	Physical Interactions	IREF-BIND	abu-1 does not oscillate
abu-11	abu-1	0.0696256	Physical Interactions	IREF-DIP	abu-1 does not oscillate
abu-11	abu-1	0.0707519	Physical Interactions	Lee-Marcotte-2010 Protein interactions	abu-1 does not oscillate
abu-11	abu-1	0.0850081	Physical Interactions	Lee-Marcotte-2010 Y2H	abu-1 does not oscillate
abu-11	abu-8	0.0409468	Physical Interactions	IREF-BIOGRID
abu-11	abu-8	0.0295975	Physical Interactions	IREF-INTACT
abu-11	abu-8	0.040058	Physical Interactions	Li-Vidal-2004
abu-11	abu-8	0.0448458	Physical Interactions	IREF-BIND
abu-11	abu-8	0.0422067	Physical Interactions	IREF-DIP
abu-11	abu-8	0.108035	Physical Interactions	Lee-Marcotte-2010 Protein interactions
abu-11	abu-8	0.130795	Physical Interactions	Lee-Marcotte-2010 Y2H
abu-11	F45B8.3	0.169475	Physical Interactions	IREF-BIOGRID
abu-11	F45B8.3	0.12545	Physical Interactions	IREF-INTACT
abu-11	F45B8.3	0.236726	Physical Interactions	Li-Vidal-2004
abu-11	F45B8.3	0.264261	Physical Interactions	IREF-BIND
abu-11	F45B8.3	0.253845	Physical Interactions	IREF-DIP
abu-11	F45B8.3	0.373336	Physical Interactions	Lee-Marcotte-2010 Protein interactions
abu-11	F45B8.3	0.287394	Physical Interactions	Lee-Marcotte-2010 Y2H
abu-11	lys-8	0.0583438	Physical Interactions	IREF-BIOGRID	lys-8 does not oscillate
abu-11	lys-8	0.0470964	Physical Interactions	IREF-INTACT	lys-8 does not oscillate
abu-11	lys-8	0.0568642	Physical Interactions	Li-Vidal-2004	lys-8 does not oscillate
abu-11	lys-8	0.0576686	Physical Interactions	IREF-BIND	lys-8 does not oscillate
abu-11	lys-8	0.0625298	Physical Interactions	IREF-DIP	lys-8 does not oscillate
abu-11	M02G9.1	0.0671147	Physical Interactions	IREF-INTACT
abu-11	M02G9.1	0.109874	Physical Interactions	Li-Vidal-2004
abu-11	M02G9.1	0.119082	Physical Interactions	IREF-DIP
abu-11	M02G9.1	0.122644	Physical Interactions	Lee-Marcotte-2010 Y2H
abu-11	phat-4	0.133404	Physical Interactions	IREF-BIOGRID
abu-11	phat-4	0.121868	Physical Interactions	IREF-INTACT
abu-11	phat-4	0.121625	Physical Interactions	Li-Vidal-2004
abu-11	phat-4	0.135244	Physical Interactions	IREF-BIND
abu-11	phat-4	0.124762	Physical Interactions	IREF-DIP
abu-11	phat-4	0.379293	Physical Interactions	Lee-Marcotte-2010 Protein interactions
abu-11	phat-4	0.256922	Physical Interactions	Lee-Marcotte-2010 Y2H
abu-11	pqn-71	0.0249219	Physical Interactions	IREF-BIOGRID
abu-11	pqn-71	0.0214778	Physical Interactions	IREF-INTACT
abu-11	pqn-71	0.0329099	Physical Interactions	Li-Vidal-2004
abu-11	pqn-71	0.0250917	Physical Interactions	IREF-BIND
abu-11	pqn-71	0.0384742	Physical Interactions	IREF-DIP
abu-11	pqn-71	0.0683595	Physical Interactions	Lee-Marcotte-2010 Protein interactions
abu-11	pqn-71	0.0927232	Physical Interactions	Lee-Marcotte-2010 Y2H
abu-14	abu-1	0.070378	Physical Interactions	IREF-BIOGRID	abu-1 does not oscillate
abu-14	abu-1	0.053933	Physical Interactions	IREF-INTACT	abu-1 does not oscillate
abu-14	abu-1	0.196363	Physical Interactions	IREF-SMALL-SCALE-STUDIES	abu-1 does not oscillate
abu-14	abu-1	0.118069	Physical Interactions	Lee-Marcotte-2010 Protein interactions	abu-1 does not oscillate
abu-14	abu-1	0.217461	Physical Interactions	BIOGRID-SMALL-SCALE-STUDIES	abu-1 does not oscillate
abu-14	abu-10	0.0938682	Physical Interactions	IREF-BIOGRID
abu-14	abu-10	0.0894974	Physical Interactions	IREF-INTACT
abu-14	abu-10	0.0926714	Physical Interactions	Li-Vidal-2004
abu-14	abu-10	0.10516	Physical Interactions	IREF-DIP
abu-14	abu-10	0.319744	Physical Interactions	Lee-Marcotte-2010 Protein interactions
abu-14	abu-10	0.115872	Physical Interactions	Lee-Marcotte-2010 Y2H
abu-14	F30H5.3	0.0805639	Physical Interactions	IREF-BIOGRID
abu-14	F30H5.3	0.0740045	Physical Interactions	IREF-INTACT
abu-14	F30H5.3	0.0961622	Physical Interactions	Li-Vidal-2004
abu-14	F30H5.3	0.10355	Physical Interactions	IREF-DIP
abu-14	F30H5.3	0.151947	Physical Interactions	Lee-Marcotte-2010 Protein interactions
abu-14	F30H5.3	0.192981	Physical Interactions	Lee-Marcotte-2010 Y2H
abu-14	pqn-71	0.0478875	Physical Interactions	IREF-BIOGRID
abu-14	pqn-71	0.0418865	Physical Interactions	IREF-INTACT
abu-14	pqn-71	0.1175	Physical Interactions	IREF-SMALL-SCALE-STUDIES
abu-14	pqn-71	0.120422	Physical Interactions	Lee-Marcotte-2010 Protein interactions
abu-14	pqn-71	0.122215	Physical Interactions	BIOGRID-SMALL-SCALE-STUDIES
abu-15	abu-1	0.0270155	Physical Interactions	IREF-BIOGRID	abu-1 does not oscillate
abu-15	abu-1	0.0209664	Physical Interactions	IREF-INTACT	abu-1 does not oscillate
abu-15	abu-1	0.0504659	Physical Interactions	Li-Vidal-2004	abu-1 does not oscillate
abu-15	abu-1	0.0343717	Physical Interactions	IREF-BIND	abu-1 does not oscillate
abu-15	abu-1	0.0499576	Physical Interactions	IREF-DIP	abu-1 does not oscillate
abu-15	abu-1	0.0700366	Physical Interactions	Lee-Marcotte-2010 Protein interactions	abu-1 does not oscillate
abu-15	abu-1	0.102597	Physical Interactions	Lee-Marcotte-2010 Y2H	abu-1 does not oscillate
abu-15	abu-11	0.0101359	Physical Interactions	IREF-BIOGRID
abu-15	abu-11	0.00887866	Physical Interactions	IREF-INTACT
abu-15	abu-11	0.00782419	Physical Interactions	Li-Vidal-2004
abu-15	abu-11	0.0100457	Physical Interactions	IREF-BIND
abu-15	abu-11	0.00906742	Physical Interactions	IREF-DIP
abu-15	abu-11	0.0446839	Physical Interactions	Lee-Marcotte-2010 Protein interactions
abu-15	abu-11	0.0337418	Physical Interactions	Lee-Marcotte-2010 Y2H
abu-15	abu-14	0.0194761	Physical Interactions	IREF-BIOGRID
abu-15	abu-14	0.0173154	Physical Interactions	IREF-INTACT
abu-15	abu-14	0.0190092	Physical Interactions	Li-Vidal-2004
abu-15	abu-14	0.0226159	Physical Interactions	IREF-DIP
abu-15	abu-14	0.0708213	Physical Interactions	Lee-Marcotte-2010 Protein interactions
abu-15	abu-14	0.0825984	Physical Interactions	Lee-Marcotte-2010 Y2H
abu-15	abu-8	0.030202	Physical Interactions	IREF-BIOGRID
abu-15	abu-8	0.0224392	Physical Interactions	IREF-INTACT
abu-15	abu-8	0.0311398	Physical Interactions	Li-Vidal-2004
abu-15	abu-8	0.0328946	Physical Interactions	IREF-BIND
abu-15	abu-8	0.0302841	Physical Interactions	IREF-DIP
abu-15	abu-8	0.104853	Physical Interactions	Lee-Marcotte-2010 Protein interactions
abu-15	abu-8	0.06822	Physical Interactions	Lee-Marcotte-2010 Y2H
abu-15	F30H5.3	0.0309255	Physical Interactions	IREF-BIOGRID
abu-15	F30H5.3	0.0287692	Physical Interactions	IREF-INTACT
abu-15	F30H5.3	0.0307685	Physical Interactions	Li-Vidal-2004
abu-15	F30H5.3	0.0329709	Physical Interactions	IREF-BIND
abu-15	F30H5.3	0.0297887	Physical Interactions	IREF-DIP
abu-15	F30H5.3	0.0829025	Physical Interactions	Lee-Marcotte-2010 Protein interactions
abu-15	F30H5.3	0.0674898	Physical Interactions	Lee-Marcotte-2010 Y2H
abu-15	lys-8	0.043034	Physical Interactions	IREF-BIOGRID	lys-8 does not oscillate
abu-15	lys-8	0.035706	Physical Interactions	IREF-INTACT	lys-8 does not oscillate
abu-15	lys-8	0.0442044	Physical Interactions	Li-Vidal-2004	lys-8 does not oscillate
abu-15	lys-8	0.0423002	Physical Interactions	IREF-BIND	lys-8 does not oscillate
abu-15	lys-8	0.0448662	Physical Interactions	IREF-DIP	lys-8 does not oscillate
abu-15	M02G9.1	0.0508828	Physical Interactions	IREF-INTACT
abu-15	M02G9.1	0.0854127	Physical Interactions	Li-Vidal-2004
abu-15	M02G9.1	0.0854437	Physical Interactions	IREF-DIP
abu-15	M02G9.1	0.143213	Physical Interactions	Lee-Marcotte-2010 Y2H
abu-15	pqn-54	0.00771363	Physical Interactions	IREF-BIOGRID
abu-15	pqn-54	0.0073891	Physical Interactions	IREF-INTACT
abu-15	pqn-54	0.0063233	Physical Interactions	Li-Vidal-2004
abu-15	pqn-54	0.00766933	Physical Interactions	IREF-BIND
abu-15	pqn-54	0.00687948	Physical Interactions	IREF-DIP
abu-15	pqn-54	0.0514719	Physical Interactions	Lee-Marcotte-2010 Protein interactions
abu-15	pqn-54	0.0173644	Physical Interactions	Lee-Marcotte-2010 Y2H
abu-8	abu-1	0.109137	Physical Interactions	IREF-BIOGRID	abu-1 does not oscillate
abu-8	abu-1	0.0698925	Physical Interactions	IREF-INTACT	abu-1 does not oscillate
abu-8	abu-1	0.316439	Physical Interactions	IREF-SMALL-SCALE-STUDIES	abu-1 does not oscillate
abu-8	abu-1	0.153441	Physical Interactions	IREF-BIND	abu-1 does not oscillate
abu-8	abu-1	0.186069	Physical Interactions	Lee-Marcotte-2010 Protein interactions	abu-1 does not oscillate
abu-8	abu-1	0.344782	Physical Interactions	BIOGRID-SMALL-SCALE-STUDIES	abu-1 does not oscillate
crm-1	abu-14	0.0225517	Physical Interactions	IREF-BIOGRID
crm-1	abu-14	0.0196148	Physical Interactions	IREF-INTACT
crm-1	abu-14	0.0235325	Physical Interactions	Li-Vidal-2004
crm-1	abu-14	0.029021	Physical Interactions	IREF-DIP
crm-1	B0507.1	0.027522	Physical Interactions	IREF-BIOGRID
crm-1	B0507.1	0.0257833	Physical Interactions	IREF-INTACT
crm-1	B0507.1	0.0215674	Physical Interactions	Li-Vidal-2004
crm-1	B0507.1	0.0309009	Physical Interactions	IREF-DIP
crm-1	F30H5.3	0.0358091	Physical Interactions	IREF-BIOGRID
crm-1	F30H5.3	0.0325896	Physical Interactions	IREF-INTACT
crm-1	F30H5.3	0.0380899	Physical Interactions	Li-Vidal-2004
crm-1	F30H5.3	0.0382252	Physical Interactions	IREF-DIP
crm-1	T01B7.8	0.0422459	Physical Interactions	Li-Vidal-2004	single line of evidence
pqn-54	abu-11	0.0104579	Physical Interactions	IREF-BIOGRID
pqn-54	abu-11	0.00974627	Physical Interactions	IREF-INTACT
pqn-54	abu-11	0.00813423	Physical Interactions	Li-Vidal-2004
pqn-54	abu-11	0.0104558	Physical Interactions	IREF-BIND
pqn-54	abu-11	0.0095879	Physical Interactions	IREF-DIP
pqn-54	abu-11	0.0522584	Physical Interactions	Lee-Marcotte-2010 Protein interactions
pqn-54	abu-11	0.0298861	Physical Interactions	Lee-Marcotte-2010 Y2H
pqn-54	abu-8	0.0311614	Physical Interactions	IREF-BIOGRID
pqn-54	abu-8	0.0246319	Physical Interactions	IREF-INTACT
pqn-54	abu-8	0.0323738	Physical Interactions	Li-Vidal-2004
pqn-54	abu-8	0.0342373	Physical Interactions	IREF-BIND
pqn-54	abu-8	0.0320224	Physical Interactions	IREF-DIP
pqn-54	abu-8	0.123993	Physical Interactions	Lee-Marcotte-2010 Protein interactions
pqn-54	abu-8	0.0661684	Physical Interactions	Lee-Marcotte-2010 Y2H
pqn-54	lys-8	0.0444009	Physical Interactions	IREF-BIOGRID	lys-8 does not oscillate
pqn-54	lys-8	0.0391951	Physical Interactions	IREF-INTACT	lys-8 does not oscillate
pqn-54	lys-8	0.0459561	Physical Interactions	Li-Vidal-2004	lys-8 does not oscillate
pqn-54	lys-8	0.0440267	Physical Interactions	IREF-BIND	lys-8 does not oscillate
pqn-54	lys-8	0.0474416	Physical Interactions	IREF-DIP	lys-8 does not oscillate
pqn-54	M02G9.1	0.055855	Physical Interactions	IREF-INTACT
pqn-54	M02G9.1	0.0887972	Physical Interactions	Li-Vidal-2004
pqn-54	M02G9.1	0.0903483	Physical Interactions	IREF-DIP
pqn-54	M02G9.1	0.141836	Physical Interactions	Lee-Marcotte-2010 Y2H
pqn-71	abu-1	0.066425	Physical Interactions	IREF-BIOGRID	abu-1 does not oscillate
pqn-71	abu-1	0.0507185	Physical Interactions	IREF-INTACT	abu-1 does not oscillate
pqn-71	abu-1	0.212269	Physical Interactions	Li-Vidal-2004	abu-1 does not oscillate
pqn-71	abu-1	0.085852	Physical Interactions	IREF-BIND	abu-1 does not oscillate
pqn-71	abu-1	0.211976	Physical Interactions	IREF-DIP	abu-1 does not oscillate
pqn-71	abu-1	0.0843568	Physical Interactions	Lee-Marcotte-2010 Protein interactions	abu-1 does not oscillate
pqn-71	abu-1	0.472786	Physical Interactions	Lee-Marcotte-2010 Y2H	abu-1 does not oscillate
pqn-71	abu-8	0.0742601	Physical Interactions	IREF-BIOGRID
pqn-71	abu-8	0.0542813	Physical Interactions	IREF-INTACT
pqn-71	abu-8	0.13098	Physical Interactions	Li-Vidal-2004
pqn-71	abu-8	0.189351	Physical Interactions	IREF-SMALL-SCALE-STUDIES
pqn-71	abu-8	0.0821625	Physical Interactions	IREF-BIND
pqn-71	abu-8	0.128499	Physical Interactions	IREF-DIP
pqn-71	abu-8	0.159169	Physical Interactions	Lee-Marcotte-2010 Protein interactions
pqn-71	abu-8	0.193771	Physical Interactions	BIOGRID-SMALL-SCALE-STUDIES
pqn-71	abu-8	0.23287	Physical Interactions	Lee-Marcotte-2010 Y2H
pqn-71	lys-8	0.105811	Physical Interactions	IREF-BIOGRID	lys-8 does not oscillate
pqn-71	lys-8	0.0863742	Physical Interactions	IREF-INTACT	lys-8 does not oscillate
pqn-71	lys-8	0.185932	Physical Interactions	Li-Vidal-2004	lys-8 does not oscillate
pqn-71	lys-8	0.105655	Physical Interactions	IREF-BIND	lys-8 does not oscillate
pqn-71	lys-8	0.190373	Physical Interactions	IREF-DIP	lys-8 does not oscillate
pqn-71	M02G9.1	0.123087	Physical Interactions	IREF-INTACT
pqn-71	M02G9.1	0.345485	Physical Interactions	IREF-SMALL-SCALE-STUDIES
pqn-71	M02G9.1	0.492835	Physical Interactions	Lee-Marcotte-2010 Protein interactions
pqn-71	M02G9.1	0.358042	Physical Interactions	BIOGRID-SMALL-SCALE-STUDIES
pqn-71	pqn-13	0.411235	Physical Interactions	IREF-BIOGRID
pqn-71	pqn-13	0.396938	Physical Interactions	IREF-INTACT
pqn-71	pqn-13	0.345485	Physical Interactions	IREF-SMALL-SCALE-STUDIES
pqn-71	pqn-13	0.407124	Physical Interactions	IREF-BIND
pqn-71	pqn-13	0.358042	Physical Interactions	BIOGRID-SMALL-SCALE-STUDIES
pqn-71	pqn-74	0.411235	Physical Interactions	IREF-BIOGRID
pqn-71	pqn-74	0.396938	Physical Interactions	IREF-INTACT
pqn-71	pqn-74	0.345485	Physical Interactions	IREF-SMALL-SCALE-STUDIES
pqn-71	pqn-74	0.407124	Physical Interactions	IREF-BIND
pqn-71	pqn-74	0.358042	Physical Interactions	BIOGRID-SMALL-SCALE-STUDIES
R02F11.1	crm-1	0.0141244	Physical Interactions	IREF-BIOGRID
R02F11.1	crm-1	0.0134561	Physical Interactions	IREF-INTACT
R02F11.1	crm-1	0.0121442	Physical Interactions	Li-Vidal-2004
R02F11.1	crm-1	0.0134352	Physical Interactions	IREF-DIP

## Sheet: Fig 5C (BWM-SS-PPIs)
# Database version: 13 August 2021 00:00:00
# Network generated on: 27 February 2022
# Author: GeneMANIA (genemania.org)
# Notes: Network weight reflects the data source relevance for predicting the function of interest
Entity 1	Entity 2	Weight	Network group	Network
far-2	far-1	0.189819	Physical Interactions	IREF-biogrid
far-2	far-1	0.195401	Physical Interactions	Hu-Emili-2019
far-2	far-6	0.0888963	Physical Interactions	IREF-biogrid
far-2	far-6	0.0972297	Physical Interactions	Hu-Emili-2019
far-6	lec-5	0.558417	Physical Interactions	IREF-biogrid
far-6	lec-5	0.579674	Physical Interactions	Hu-Emili-2019
lbp-2	E04F6.9	0.0785739	Physical Interactions	IREF-biogrid
lbp-2	E04F6.9	0.0848704	Physical Interactions	Hu-Emili-2019
lbp-2	far-6	0.0443178	Physical Interactions	IREF-biogrid
lbp-2	far-6	0.0466838	Physical Interactions	Hu-Emili-2019
lbp-2	ttr-16	0.0346968	Physical Interactions	IREF-biogrid
lbp-2	ttr-16	0.0363664	Physical Interactions	Hu-Emili-2019
ttr-6	ttr-16	0.13	Physical Interactions	IREF-biogrid
ttr-6	ttr-16	0.123726	Physical Interactions	Hu-Emili-2019
unc-29	lev-1	0.0167687	Physical Interactions	IREF-mint
unc-29	lev-1	0.0167517	Physical Interactions	Gottschalk-Schafer-2005
unc-29	lev-1	1	Physical Interactions	IREF-bind-translation
unc-29	lev-1	0.017923	Physical Interactions	IREF-intact
unc-29	lev-8	0.0877583	Physical Interactions	IREF-mint
unc-29	lev-8	0.0875145	Physical Interactions	Gottschalk-Schafer-2005
unc-29	lev-8	0.0937992	Physical Interactions	IREF-intact
unc-29	oig-4	0.0208454	Physical Interactions	IREF-mint
unc-29	oig-4	0.707107	Physical Interactions	IREF-SMALL-SCALE-STUDIES
unc-29	oig-4	0.0222803	Physical Interactions	IREF-intact
unc-29	oig-4	0.536095	Physical Interactions	IREF-biogrid
unc-29	oig-4	1	Physical Interactions	BIOGRID-SMALL-SCALE-STUDIES

## Sheet: Fig 5C (neurons-SS-PPIs)
# Organism: C. elegans
# Application version: 3.6.0
# Database version: 13 August 2021 00:00:00
# Network generated on: 27 February 2022
# Author: GeneMANIA (genemania.org)
# Notes: Network weight reflects the data source relevance for predicting the function of interest
Entity 1	Entity 2	Weight	Network group	Network
glr-1	sol-1	1	Physical Interactions	IREF-dip
glr-1	sol-1	0.3129	Physical Interactions	IREF-SMALL-SCALE-STUDIES
glr-1	sol-1	1	Physical Interactions	IREF-bind-translation
glr-1	sol-1	1	Physical Interactions	IREF-intact
glr-1	sol-2	0.3129	Physical Interactions	IREF-SMALL-SCALE-STUDIES
glr-1	sol-2	0.414214	Physical Interactions	IREF-biogrid
glr-1	sol-2	0.414214	Physical Interactions	BIOGRID-SMALL-SCALE-STUDIES
sol-1	sol-2	0.585786	Physical Interactions	IREF-SMALL-SCALE-STUDIES
sol-1	sol-2	0.765367	Physical Interactions	IREF-biogrid
sol-1	sol-2	0.765367	Physical Interactions	BIOGRID-SMALL-SCALE-STUDIES

## Sheet: Fig 5C (intestine-SS PPIs)
# Organism: C. elegans
# Application version: 3.6.0
# Database version: 13 August 2021 00:00:00
# Network generated on: 27 February 2022
# Author: GeneMANIA (genemania.org)
# Notes: Network weight reflects the data source relevance for predicting the function of interest
Entity 1	Entity 2	Weight	Network group	Network
asp-14	dod-17	0.376711	Physical Interactions	IREF-biogrid
asp-14	dod-17	0.374084	Physical Interactions	Hu-Emili-2019
asp-14	F28H7.3	0.039063	Physical Interactions	IREF-biogrid
asp-14	F28H7.3	0.0388689	Physical Interactions	Hu-Emili-2019
asp-14	spp-5	0.0539834	Physical Interactions	IREF-biogrid
asp-14	spp-5	0.0681206	Physical Interactions	Hu-Emili-2019
asp-3	asp-14	0.0255269	Physical Interactions	IREF-biogrid
asp-3	asp-14	0.0260399	Physical Interactions	Hu-Emili-2019
asp-3	cpr-4	0.132922	Physical Interactions	IREF-biogrid
asp-3	cpr-4	0.17114	Physical Interactions	Hu-Emili-2019
asp-3	ilys-5	0.0164063	Physical Interactions	IREF-biogrid
asp-3	ilys-5	0.0168154	Physical Interactions	Hu-Emili-2019
asp-3	T21H3.1	0.0257426	Physical Interactions	IREF-biogrid
asp-3	T21H3.1	0.0250388	Physical Interactions	Hu-Emili-2019
asp-6	dsc-4	0.46199	Physical Interactions	IREF-biogrid
asp-6	dsc-4	0.449328	Physical Interactions	Hu-Emili-2019
asp-6	F28B4.3	0.0989013	Physical Interactions	IREF-biogrid
asp-6	F28B4.3	0.0966349	Physical Interactions	Hu-Emili-2019
clec-63	asp-3	0.0239857	Physical Interactions	IREF-biogrid
clec-63	asp-3	0.0247415	Physical Interactions	Hu-Emili-2019
clec-63	cpr-1	0.0405804	Physical Interactions	IREF-biogrid
clec-63	cpr-1	0.0390428	Physical Interactions	Hu-Emili-2019
clec-63	lys-1	0.107072	Physical Interactions	IREF-biogrid
clec-63	lys-1	0.101967	Physical Interactions	Hu-Emili-2019
clec-65	pho-8	0.144171	Physical Interactions	IREF-biogrid
clec-65	pho-8	0.140272	Physical Interactions	Hu-Emili-2019
cpr-1	asp-14	0.0431879	Physical Interactions	IREF-biogrid
cpr-1	asp-14	0.0410917	Physical Interactions	Hu-Emili-2019
cpr-1	F28H7.3	0.061772	Physical Interactions	IREF-biogrid
cpr-1	F28H7.3	0.0581977	Physical Interactions	Hu-Emili-2019
cpr-1	ilys-5	0.0277572	Physical Interactions	IREF-biogrid
cpr-1	ilys-5	0.0265351	Physical Interactions	Hu-Emili-2019
cpr-1	T21H3.1	0.0435529	Physical Interactions	IREF-biogrid
cpr-1	T21H3.1	0.039512	Physical Interactions	Hu-Emili-2019
cpr-5	asp-14	0.0596589	Physical Interactions	IREF-biogrid
cpr-5	asp-14	0.0629878	Physical Interactions	Hu-Emili-2019
cpr-5	asp-3	0.0557619	Physical Interactions	IREF-biogrid
cpr-5	asp-3	0.0597648	Physical Interactions	Hu-Emili-2019
cpr-5	cpr-1	0.0943412	Physical Interactions	IREF-biogrid
cpr-5	cpr-1	0.0943106	Physical Interactions	Hu-Emili-2019
F19C7.1	T20D3.2	0.126492	Physical Interactions	IREF-biogrid
F19C7.1	T20D3.2	0.139766	Physical Interactions	Hu-Emili-2019
F28B4.3	F19C7.1	0.0705474	Physical Interactions	IREF-biogrid
F28B4.3	F19C7.1	0.0724584	Physical Interactions	Hu-Emili-2019
F28B4.3	R09H10.5	0.0981877	Physical Interactions	IREF-biogrid
F28B4.3	R09H10.5	0.0976135	Physical Interactions	Hu-Emili-2019
F28B4.3	T20D3.2	0.0739035	Physical Interactions	IREF-biogrid
F28B4.3	T20D3.2	0.0802416	Physical Interactions	Hu-Emili-2019
F28B4.3	T25C12.3	0.0572099	Physical Interactions	IREF-biogrid
F28B4.3	T25C12.3	0.0600104	Physical Interactions	Hu-Emili-2019
F28B4.3	Y34B4A.9	0.0636109	Physical Interactions	IREF-biogrid
F28B4.3	Y34B4A.9	0.060639	Physical Interactions	Hu-Emili-2019
F57F5.1	asp-3	0.0457254	Physical Interactions	IREF-biogrid
F57F5.1	asp-3	0.0501475	Physical Interactions	Hu-Emili-2019
F57F5.1	cpr-1	0.0773609	Physical Interactions	IREF-biogrid
F57F5.1	cpr-1	0.0791341	Physical Interactions	Hu-Emili-2019
F57F5.1	cpr-5	0.106865	Physical Interactions	IREF-biogrid
F57F5.1	cpr-5	0.121301	Physical Interactions	Hu-Emili-2019
F57F5.1	F28H7.3	0.0699721	Physical Interactions	IREF-biogrid
F57F5.1	F28H7.3	0.0748533	Physical Interactions	Hu-Emili-2019
F57F5.1	ilys-5	0.0314419	Physical Interactions	IREF-biogrid
F57F5.1	ilys-5	0.0341292	Physical Interactions	Hu-Emili-2019
F57F5.1	T21H3.1	0.0493344	Physical Interactions	IREF-biogrid
F57F5.1	T21H3.1	0.0508199	Physical Interactions	Hu-Emili-2019
gba-1	ilys-5	0.0662049	Physical Interactions	IREF-biogrid
gba-1	ilys-5	0.131471	Physical Interactions	Hu-Emili-2019
gba-4	pho-8	0.13099	Physical Interactions	IREF-biogrid
gba-4	pho-8	0.145929	Physical Interactions	Hu-Emili-2019
K12H4.7	F28B4.3	0.116329	Physical Interactions	IREF-biogrid
K12H4.7	F28B4.3	0.115977	Physical Interactions	Hu-Emili-2019
K12H4.7	T20D3.2	0.208578	Physical Interactions	IREF-biogrid
K12H4.7	T20D3.2	0.223709	Physical Interactions	Hu-Emili-2019
K12H4.7	Y34B4A.9	0.179529	Physical Interactions	IREF-biogrid
K12H4.7	Y34B4A.9	0.169058	Physical Interactions	Hu-Emili-2019
LLC1.2	F19C7.1	0.13421	Physical Interactions	IREF-biogrid
LLC1.2	F19C7.1	0.148206	Physical Interactions	Hu-Emili-2019
LLC1.2	T20D3.2	0.140594	Physical Interactions	IREF-biogrid
LLC1.2	T20D3.2	0.164126	Physical Interactions	Hu-Emili-2019
R09H10.5	Y16B4A.2	0.683959	Physical Interactions	IREF-biogrid
R09H10.5	Y16B4A.2	0.676833	Physical Interactions	Hu-Emili-2019
T16G12.1	R09H10.5	0.250512	Physical Interactions	IREF-biogrid
T16G12.1	R09H10.5	0.237388	Physical Interactions	Hu-Emili-2019
T21H3.1	ilys-5	0.0177013	Physical Interactions	IREF-biogrid
T21H3.1	ilys-5	0.0170409	Physical Interactions	Hu-Emili-2019
T21H3.1	npa-1	0.041155	Physical Interactions	IREF-biogrid
T21H3.1	npa-1	0.0419039	Physical Interactions	Hu-Emili-2019
T25C12.3	F19C7.1	0.0979194	Physical Interactions	IREF-biogrid
T25C12.3	F19C7.1	0.104527	Physical Interactions	Hu-Emili-2019
T25C12.3	LLC1.2	0.108836	Physical Interactions	IREF-biogrid
T25C12.3	LLC1.2	0.122745	Physical Interactions	Hu-Emili-2019
T25C12.3	T20D3.2	0.102578	Physical Interactions	IREF-biogrid
T25C12.3	T20D3.2	0.115755	Physical Interactions	Hu-Emili-2019
T25C12.3	Y34B4A.9	0.0882915	Physical Interactions	IREF-biogrid
T25C12.3	Y34B4A.9	0.0874766	Physical Interactions	Hu-Emili-2019
Y34B4A.6	F19C7.1	0.127026	Physical Interactions	IREF-biogrid
Y34B4A.6	F19C7.1	0.139757	Physical Interactions	Hu-Emili-2019
Y34B4A.6	F28B4.3	0.0742157	Physical Interactions	IREF-biogrid
Y34B4A.6	F28B4.3	0.0802362	Physical Interactions	Hu-Emili-2019
Y34B4A.6	LLC1.2	0.141188	Physical Interactions	IREF-biogrid
Y34B4A.6	LLC1.2	0.164115	Physical Interactions	Hu-Emili-2019
Y34B4A.6	T20D3.2	0.133069	Physical Interactions	IREF-biogrid
Y34B4A.6	T20D3.2	0.154769	Physical Interactions	Hu-Emili-2019
Y34B4A.6	T25C12.3	0.103011	Physical Interactions	IREF-biogrid
Y34B4A.6	T25C12.3	0.115747	Physical Interactions	Hu-Emili-2019
Y34B4A.6	Y34B4A.9	0.114536	Physical Interactions	IREF-biogrid
Y34B4A.6	Y34B4A.9	0.116959	Physical Interactions	Hu-Emili-2019
Y34B4A.9	F19C7.1	0.108875	Physical Interactions	IREF-biogrid
Y34B4A.9	F19C7.1	0.105622	Physical Interactions	Hu-Emili-2019
Y34B4A.9	LLC1.2	0.121014	Physical Interactions	IREF-biogrid
Y34B4A.9	LLC1.2	0.124031	Physical Interactions	Hu-Emili-2019
Y34B4A.9	T20D3.2	0.114055	Physical Interactions	IREF-biogrid
Y34B4A.9	T20D3.2	0.116967	Physical Interactions	Hu-Emili-2019
