# Supplementary material for: A spatiotemporal reconstruction of the C. elegans pharyngeal cuticle reveals a structure rich in phase-separating proteins
Source: eLife. 2022 Oct 19;11:e79396. doi: 10.7554/eLife.79396 (PMC9629831; doi:10.7554/eLife.79396)
Supplement: Figure 9—source data 1. [file elife-79396-fig9-data1.xlsx]

## Sheet: Figure 9-source data 1
#
#
# Percent Identity Matrix - created by Clustal2.1
#
#
			pqn-54	abu-6	abu-15	abu-8	abu-7	idpb-5	idpb-3	idpb-2	idpb-4	idpb-1	Y61A9LA.7	B0348.5	pqn-10	pqn-75	idpa-2	idpa-3	idpa-1	C05E11.7	T14E8.4	cyn-17	R06F6.7	D1054.9	cpg-19	M110.9	Y62F5A.9	R11.2	Y75B7AR.1	F40E10.5	ora-1	H01G02.1	F35A5.2	C47E8.9	T06G6.12	F20B10.3	T23F6.1	H22K11.3	pqn-67	W08E12.2	W08E12.3	F07H5.8	pqn-71	abu-11	abu-10	pqn-13	M02G9.3	abu-14	M02G9.1
	pqn-54		100	86.59	87.15	86.78	86.98	18.48	19.51	23.17	20.48	22.89	0	0						8.33	0	20		8.33								10.34	0	8.33	14.29	17.86	22.06	19.05	14.1	19.44	18.18	31.79	46.3	39.25	34.4	35.83	31.21	34.34	29.84
	abu-6		86.59	100	99.18	97.28	98.37	21.35	21.52	25.32	23.75	25	0	0						8.33	0	20		8.33								10.34	0	12.5	14.29	17.86	21.21	19.05	15.38	19.44	18.18	32.51	47.53	40.11	32.72	37.94	29.65	35.03	29.9
	abu-15		87.15	99.18	100	98.1	98.64	21.35	21.52	25.32	23.75	25	0	0						8.33	0	20		8.33								10.34	0	12.5	14.29	17.86	21.21	19.05	15.38	19.44	18.18	32.82	47.53	40.11	33.18	37.55	29.65	35.03	29.9
	abu-8		86.78	97.28	98.1	100	98.8	21.35	21.52	25.32	23.75	25	0	0						8.33	0	20		8.33								13.79	0	12.5	14.29	17.86	21.21	19.05	15.38	19.44	18.18	34.81	44.68	39.72	33.74	38.57	29.67	36.65	28.99
	abu-7		86.98	98.37	98.64	98.8	100	21.35	21.52	25.32	23.75	25	0	0						8.33	0	20		8.33								10.34	0	12.5	14.29	17.86	21.21	19.05	15.38	19.44	18.18	34.63	44.92	39.44	33.47	39.07	29.28	36.82	29.08
	idpb-5		18.48	21.35	21.35	21.35	21.35	100	57.05	63.7	75.81	74.4	0	5.26	0				6.67	6.9	11.54	8.7		5.71									14.29			24.59	38.89	2.99	10.14	23.08	24.39	19.19	25.37	17.65	17.58	24.69	23.53	25.37	16.81
	idpb-3		19.51	21.52	21.52	21.52	21.52	57.05	100	71.52	75.54	79.02	0	3.33					0	7.41	8.33	9.52		9.09								50	0			16	29.17	2.17	15.49	27.27	19.23	24.18	22.03	19.35	12.64	18.67	25	22.39	18.69
	idpb-2		23.17	25.32	25.32	25.32	25.32	63.7	71.52	100	81.56	85.52	4	3.85					0	8.7	10	5.88		6.9								50	20			24.44	43.48	5	15.38	30.23	23.53	27.47	24.59	20	14.29	26.39	26.47	25.37	20.39
	idpb-4		20.48	23.75	23.75	23.75	23.75	75.81	75.54	81.56	100	88.03	0	0						11.76	7.14	9.09		4.35								50	40			37.04	42.22	9.52	21.43	30.23	25.53	24.72	24.59	21.05	16.67	23.19	26.15	25	19.42
	idpb-1		22.89	25	25	25	25	74.4	79.02	85.52	88.03	100	0	0						11.76	7.14	9.09		4.35								50	40			37.04	44.44	9.52	20.93	30.23	22.92	27.17	24.59	20	16.67	26.39	26.47	25.37	20.19
	Y61A9LA.7		0	0	0	0	0	0	0	4	0	0	100	12.5	21.31	12.2				9.23	11.86	8.47	11.76	7.79	7.41	5.13	4.08	11.76	18.18	5.97	13.79					0	0	0	6.67	0	0	6.25	0	0	5.26	5.56	10	0	0
	B0348.5		0	0	0	0	0	5.26	3.33	3.85	0	0	12.5	100	20.9	22.9	25	27.45	29.52	8.94	9.41	10.61	6.25	10.11	20	4.62	13.79	5.45	8.97	9.45	8.91		0			23.33	0	14.86	15.91	0	0	22.22	0	0	13.33	0	0	0	6.67
	pqn-10							0					21.31	20.9	100	19.31	17.78	26.32	25.5	11.98	10.29	12.69	25	8.75	0	10.96	10.68	9.62	19.1	11.9	12					22.22		22.64	12.07
	pqn-75												12.2	22.9	19.31	100	39.02	32.65	36.81	15.06	9.8	16.36	15.71	11.01	9.3	4.55	8.66	13.11	14.71	9.79	14.29				44.44	25		17.86	13.58
	idpa-2													25	17.78	39.02	100	45.45	62.86	6.67	7.14	5.88		0		0	0		0	0	0				0			18.75	11.11
	idpa-3													27.45	26.32	32.65	45.45	100	74.36	3.92	1.96	6.06		11.76												0		14.29	4.88
	idpa-1							6.67	0	0				29.52	25.5	36.81	62.86	74.36	100	6.54	3.81	10.45		10.34		0	0		0	0	0				11.11	11.11		14.44	5.94
	C05E11.7		8.33	8.33	8.33	8.33	8.33	6.9	7.41	8.7	11.76	11.76	9.23	8.94	11.98	15.06	6.67	3.92	6.54	100	29.63	17.54	6.98	12.95	12.68	11.69	7.26	6.67	8.89	12.12	10.49		0		0	4.76	15	7.14	10.14	14.29	0	7.69	14.29	0	16.67	17.65	0	25	5.56
	T14E8.4		0	0	0	0	0	11.54	8.33	10	7.14	7.14	11.86	9.41	10.29	9.8	7.14	1.96	3.81	29.63	100	15.93	20.45	13.31	12.82	13.64	11.21	9.09	13.1	10.46	8.73		0		0	4.76	11.11	5.45	4.69	0	0	20	0		0	14.29	0	0	6.67
	cyn-17		20	20	20	20	20	8.7	9.52	5.88	9.09	9.09	8.47	10.61	12.69	16.36	5.88	6.06	10.45	17.54	15.93	100	17.95	25.57	18.29	8.14	13.64	9.09	12.62	12.82	12.06		0		20	0	18.18	9.68	2.33	50	16.67	0	0	0	12.5	14.29	0	0	0
	R06F6.7												11.76	6.25	25	15.71				6.98	20.45	17.95	100	28.92	11.59	11.11	18.18			10.71	0
	D1054.9		8.33	8.33	8.33	8.33	8.33	5.71	9.09	6.9	4.35	4.35	7.79	10.11	8.75	11.01	0	11.76	10.34	12.95	13.31	25.57	28.92	100	33.1	5.88	11.97	13.95	12.94	16.77	13.68		0		20	4.55	14.29	7.89	8.7	13.33	13.33	0	14.29	33.33	0	11.11	14.29	0	5.26
	cpg-19												7.41	20	0	9.3				12.68	12.82	18.29	11.59	33.1	100	6.25	9.68	0	0	29.41	6.9
	M110.9												5.13	4.62	10.96	4.55	0		0	11.69	13.64	8.14	11.11	5.88	6.25	100	21.35	11.54	22.67	16.67	18.69
	Y62F5A.9												4.08	13.79	10.68	8.66	0		0	7.26	11.21	13.64	18.18	11.97	9.68	21.35	100	16.67	19.05	17.42	20.57
	R11.2												11.76	5.45	9.62	13.11				6.67	9.09	9.09		13.95	0	11.54	16.67	100	18	21.43	15.71
	Y75B7AR.1												18.18	8.97	19.1	14.71	0		0	8.89	13.1	12.62		12.94	0	22.67	19.05	18	100	17.8	26.5
	F40E10.5												5.97	9.45	11.9	9.79	0		0	12.12	10.46	12.82	10.71	16.77	29.41	16.67	17.42	21.43	17.8	100	28.27
	ora-1												13.79	8.91	12	14.29	0		0	10.49	8.73	12.06	0	13.68	6.9	18.69	20.57	15.71	26.5	28.27	100
	H01G02.1		10.34	10.34	10.34	13.79	10.34		50	50	50	50																				100	13.16	14.29	9.52	22	25		26.92	19.05	14.29	15.38	3.12	12.82	6.25	9.72	17.02	8	9.47
	F35A5.2		0	0	0	0	0	14.29	0	20	40	40		0						0	0	0		0								13.16	100	17.54	12.5	14.29	16.67	0	23.33	12.5	0	11.76	0	0	5	8.89	11.11	11.11	10.91
	C47E8.9		8.33	12.5	12.5	12.5	12.5																									14.29	17.54	100	11.32	10	25		19.27			5.43	16.67	8.33	4.17	6.58	3.33	6.67	6.92
	T06G6.12		14.29	14.29	14.29	14.29	14.29									44.44	0		11.11	0	0	20		20								9.52	12.5	11.32	100	0	0	33.33	25			7.14	7.69	10.53	20	10.42	17.39	8.7	4.65
	F20B10.3		17.86	17.86	17.86	17.86	17.86	24.59	16	24.44	37.04	37.04	0	23.33	22.22	25		0	11.11	4.76	4.76	0		4.55								22	14.29	10	0	100	21.5	16.22	19.05	28.57	34.44	12.82	11.76	13.58	8.93	16.35	7.35	14.29	17.39
	T23F6.1		22.06	21.21	21.21	21.21	21.21	38.89	29.17	43.48	42.22	44.44	0	0						15	11.11	18.18		14.29								25	16.67	25	0	21.5	100	15	23.15	33.33	36.11	21.28	20.27	17.24	20.9	25	16.9	16.67	24.75
	H22K11.3		19.05	19.05	19.05	19.05	19.05	2.99	2.17	5	9.52	9.52	0	14.86	22.64	17.86	18.75	14.29	14.44	7.14	5.45	9.68		7.89									0		33.33	16.22	15	100	31.47	12.5	16.67	16.67	18.18	16.67	9.38	9.68	5	10	16.67
	pqn-67		14.1	15.38	15.38	15.38	15.38	10.14	15.49	15.38	21.43	20.93	6.67	15.91	12.07	13.58	11.11	4.88	5.94	10.14	4.69	2.33		8.7								26.92	23.33	19.27	25	19.05	23.15	31.47	100	31.82	25.47	10.61	10.38	7.02	10.96	16.58	10.75	12.73	15.25
	W08E12.2		19.44	19.44	19.44	19.44	19.44	23.08	27.27	30.23	30.23	30.23	0	0						14.29	0	50		13.33								19.05	12.5			28.57	33.33	12.5	31.82	100	72	15.87	15.25	16.33	10.64	16.42	16.67	18.52	18.33
	W08E12.3		18.18	18.18	18.18	18.18	18.18	24.39	19.23	23.53	25.53	22.92	0	0						0	0	16.67		13.33								14.29	0			34.44	36.11	16.67	25.47	72	100	16.67	16.67	21.43	16.98	17.57	14.81	18.03	18.84
	F07H5.8		31.79	32.51	32.82	34.81	34.63	19.19	24.18	27.47	24.72	27.17	6.25	22.22						7.69	20	0		0								15.38	11.76	5.43	7.14	12.82	21.28	16.67	10.61	15.87	16.67	100	29.39	26.59	27.24	34.45	27.89	32.41	32.37
	pqn-71		46.3	47.53	47.53	44.68	44.92	25.37	22.03	24.59	24.59	24.59	0	0						14.29	0	0		14.29								3.12	0	16.67	7.69	11.76	20.27	18.18	10.38	15.25	16.67	29.39	100	41.29	29.22	32.01	24.42	31.31	25.67
	abu-11		39.25	40.11	40.11	39.72	39.44	17.65	19.35	20	21.05	20	0	0						0		0		33.33								12.82	0	8.33	10.53	13.58	17.24	16.67	7.02	16.33	21.43	26.59	41.29	100	32.89	37.97	27.43	35.04	25.71
	abu-10		34.4	32.72	33.18	33.74	33.47	17.58	12.64	14.29	16.67	16.67	5.26	13.33						16.67	0	12.5		0								6.25	5	4.17	20	8.93	20.9	9.38	10.96	10.64	16.98	27.24	29.22	32.89	100	37.13	24.04	29.31	22.58
	pqn-13		35.83	37.94	37.55	38.57	39.07	24.69	18.67	26.39	23.19	26.39	5.56	0						17.65	14.29	14.29		11.11								9.72	8.89	6.58	10.42	16.35	25	9.68	16.58	16.42	17.57	34.45	32.01	37.97	37.13	100	29.92	42.04	28.24
	M02G9.3		31.21	29.65	29.65	29.67	29.28	23.53	25	26.47	26.15	26.47	10	0						0	0	0		14.29								17.02	11.11	3.33	17.39	7.35	16.9	5	10.75	16.67	14.81	27.89	24.42	27.43	24.04	29.92	100	44.28	27.31
	abu-14		34.34	35.03	35.03	36.65	36.82	25.37	22.39	25.37	25	25.37	0	0						25	0	0		0								8	11.11	6.67	8.7	14.29	16.67	10	12.73	18.52	18.03	32.41	31.31	35.04	29.31	42.04	44.28	100	28.3
	M02G9.1		29.84	29.9	29.9	28.99	29.08	16.81	18.69	20.39	19.42	20.19	0	6.67						5.56	6.67	0		5.26								9.47	10.91	6.92	4.65	17.39	24.75	16.67	15.25	18.33	18.84	32.37	25.67	25.71	22.58	28.24	27.31	28.3	100
	ZK662.2		10.98	11.76	11.76	12.94	11.76																									8	0	7.69	13.89	12.82	8.33		6.82	0	22.22	13.79	11.9	13.56	14.29	10.57	9.8	10.96	15.94
	cpg-18		28.57	14.29	14.29	28.57	14.29																									7.14	11.54	8.62	0				12.22			18.18	25	9.09	22.22	11.63	10	0	14.63
	F56D2.3		2.56	2.5	2.5	2.5	2.5																									8.89	13.16	10.26	10.81	8.33	23.08		12.57	16.67	14.29	9.94	0	4.76	6.67	5.71	5.56	5.13	9.74
	B0280.7		6	6	6	6	6																									2.17	9.76	9.29	13.89	16.67	4.76		12.43			12.11	14.29	10	2.86	9.4	0	0	12.72
	F52A8.3		21.15	17.86	17.86	17.86	17.86																									11.11	8.33	8.11	8	7.89	15.15		17.19	0	0	8.91	5.26	4.76	6.06	6.33	6	5.56	12.94
	C30G12.1		12.82	12.4	12.4	13.01	12.2																									9.09	5.13	6.32	7.69	18.42	8.82		15.33	0	0	11.47	9.21	8.33	13.19	9.33	7.61	9.17	10.89
	M02G9.2		20.69	19.18	19.86	20	20.13																									9.59	11.11	9.64	8.7	19.35	5.56		19.73	21.43	15.79	23.55	21.95	22.58	19.27	23.29	28.45	21.95	20.6
	C34B7.1		15.29	13.33	13.33	12.39	12.5																									9.68	15.15	6.98	0	17.65	6.25		12.06	23.08	19.05	11.79	8.22	6.06	9.64	8.98	15.29	9.38	11.72
	F13B6.1		9.09	11.86	11.86	11.86	11.86																									12.7	14	13.27	12.5	20.59	20		11.36	0	20	13.21	11.54	9.68	9.38	15.57	4.17	13.89	12.92
	pqn-60		7.27	10.17	10.17	10.17	10.17																									0	0	12.5	33.33	10	10		5.56	0	0	5.88	15.79	10.53	5.71	12.12	2.38	10.91	8.26
	T22B2.6		25.3	24.69	24.69	21.24	21.43	15.38	18.18	15.15	12.12	12.12	0	0						0	12.5	0		0								0				11.76	17.39	0	23.53	21.05	15.79	16.3	22.58	16.13	14.12	20.62	25.86	18.57	20.14
	pqn-26		16.49	16.41	16.41	16.59	16.59	10.14	11.43	11.76	7.35	11.59	0	0						0		0		0								9.68	9.68	8.82	15	17.14	21.43	0	11.66	18.92	25	14.81	15.38	14.17	16.67	16.6	7.25	11.31	17.56
	F45B8.3		12.2	9.76	9.76	11.69	11.69	9.09	0	0	0	0																				12.5				7.41	0		3.7	0	0	9.85	4.55	7.06	15.62	17.02	11.11	14.75	14.07
	nspb-6		10.71	12	12	12	12	13.33	15	16.67	10.53	16.67																				33.33				17.39	28.57		8.33	14.29	14.29	9.09	6.25	4.65	4.35	12.12	8.33	0	5.77
	nspb-11		5	0	0	0	0	5.88	15.38	16.67	0	16.67																				33.33				20	27.27		22.58	10.53	10.53	26.32	7.14	5.56	11.76	10.71	5	4.55	16.28
	nspb-12		4.76	0	0	0	0	4.35	5.56	6.25	0	6.25																				33.33				20	20		22.58	10.53	10.53	20	3.57	5.26	5	6.67	4.35	8	14.58
	nspb-10		4.76	0	0	0	0	4.35	5.56	6.25	0	6.25																				33.33				20	20		19.23	0	0	18.42	3.85	5.56	5.26	10.71	4.35	8.33	15.22
	nspb-8		4.76	0	0	0	0	4.35	5.56	6.25	0	6.25																				33.33				24	20		19.23	7.14	7.14	18.42	3.85	5.56	5.26	10.71	4.35	8.33	13.04
	idpc-2		12.68	11.76	11.76	19.09	19.27	16.22	14.29	15.38	17.24	14.81																				33.33				12.5	14.29		8	0	0	15.23	7.69	5.5	16.67	12.9	10	8.11	18.91
	idpc-1		19.05	17	18	17.91	17.16	15.56	13.48	16.85	16.85	16.85	6.25	11.11						15.38	10	0		30.77								20				14.71	17.91	16	12.5	14.49	16.67	12.97	12.06	12.2	17.39	17.39	10.71	12.8	20.71
	idpc-4		15.79	14.29	14.29	12.99	14.47	16.67	10.34	11.11	14.29	10.71	0							0				100								33.33				10	16.67		25	0	0	14.07	6.06	6.67	9.09	10.71	12.9	2.22	21.17
	idpc-3		16.22	14.71	14.71	14.47	16	14.71	11.11	11.54	14.29	11.11	0							0				0								33.33				10	16.67		25	0	0	13.19	4.35	8.11	8.06	11.69	7.14	2.38	17.88
	idpc-7		12.5	8.11	8.11	12.31	12.5	5.56	7.14	7.69	7.41	7.69	0							0				0								33.33				20	16.67		16.67	0	0	11.88	7.5	5.77	13.51	13.46	9.52	0	13.89
	idpc-6		10.53	8.57	8.57	8.2	8.33	9.09	4.35	4.76	4.55	4.76																				33.33				22.22	20		20	0	0	8.49	7.32	7.55	13.89	10.91	5	0	15.45
	idpc-5		10.64	9.09	9.09	8.57	8.7	9.09	4.35	4.76	4.55	4.76																				33.33				22.22	20		20	0	0	8.04	7.32	6.35	15.38	10.77	6.67	5	13.11
	Y110A2AL.9		3.7	8.33	8.33	4.44	4.44	8.33	10.34	10.34	7.41	6.9																				0				0	0		0	0	0	4.71	0	2	4.08	15.69	8.57	12.82	4.6
	F08D12.2		7.41	9.8	9.8	11.11	11.11	15	11.54	11.54	8.7	11.54																				3.85	6.67	0	10	10.53	0		10.87	9.09	9.09	7.1	6.38	8.57	9.46	16.33	10	11.25	11.26
	F08D12.3		9.26	11.76	11.76	12.5	12.5	15	11.54	11.54	8.7	11.54																				0	6.67	5.56	10	6.67	0		12.2	11.11	11.11	10.16	5.36	7.59	10.53	17.09	11.86	8.97	12.78
	F43D2.6		9.46	7.25	7.25	6.33	6.33	11.27	19.12	19.7	15.87	19.7	12.5	20						0	25	25		0								0				10.34	5.88	0	12.12	7.89	10.26	7.63	2.6	6.12	6.45	9.78	5.88	4.23	5.74
	ZK470.6		4.29	3.08	3.08	5.81	5.81	6.41	11.27	10.14	9.68	9.23	16.67	10					25	0	7.69	0		15.38								12.5				8.11	11.76	6.9	10.87	10.34	10.34	6.45	4.88	7.06	2.13	8.57	5.88	6.59	5.77
	B0310.6		6.67	7.41	7.41	7.41	7.41	10	21.62	21.62	25.71	21.62																				20				7.14	7.14	0	6.25	14.29	14.29	4.35	0	2.13	0	0	6.45	3.23	1.69
	pqn-74		13.28	9.76	9.76	9.86	9.86	9.84	14.04	14.04	14.55	14.04	0	0						25	25	0		0								9.09	7.14	9.38	5.88	4.17	16.67	11.11	13.56	25	20.83	14.34	14.56	14.81	13.1	16.06	13.27	11.97	11.15
	F23H11.6												7.89	5	8.89	14.29				11.63	12.59	9.52	6.78	13.3	10.2	9.3	4.92	8.33	16.13	7.5	2.33
	pqn-94												0	5.26	18.18	5.88	0	0	6.25	3.7	8.06	6.67	0	13.46	16.67	14.29	7.69	0	0	0	0								16.67
	R03C1.1												10.81	4.88	6.25	13.18	4.35	0	5.41	11.86	8.61	11.3	20	8.21	14.29	3.12	5.56	2.78	9.46	6.25	9.38							50	21.74
	pqn-63												10.45	11.66	13.43	20.47	18.75	8.45	11.32	15.51	8.43	9.55	0	11.56	9.09	9.38	10.48	3.17	11.54	5.92	7.33				11.11			13.04	14.29
	F35B12.3												5.56	7.45	5.51	7.33	9.52	0	3.85	15.38	11	9.76		16.49	0	8.79	7.29	1.79	3.45	4.03	4.03							0	9.09
	pqn-36		20.69	24.53	24.53	24.53	24.53	6.78	10	8.33	10.87	10.42	9.09	11.93	14.33	20	9.68	10.19	12.83	12.15	11.33	13.31	16.67	15.51	13.93	6.42	7.63	10.94	12.63	7.96	5.76	6.25			0	10.77	8.33	20.45	13.33	7.32	4.76	8.99	9.68	12.33	12.96	11.11	10.34	8.62	12.77
	M01H9.5		9.84	11.48	11.48	10.13	10.13																									0				0			0	0	0	11.4	6.67	1.75	6.85	6.74	6.67	5.06	6.6
	ZK863.8		9.09	9.09	9.09	3.12	3.12	18.18	20	25	0	22.22																														1.96	3.85	9.09	2.94	8.33	5	0	8.51
	T22B11.4		15.07	15.71	15.71	16.09	16.09	10.14	8.04	10	9.64	7.14	5.56	7.63	8.06	5.56	0	8.57	3.26	10.26	7.14	9.62		9.38		4.76	10.26	0	9.8	1.79	10.71	0	0			16.28	8.51	10.95	11.38	12	9.8	8.87	3.33	7.58	5.71	4.11	1.96	7.84	11.25
	W03F8.6					0	0						0	9.09	8.33	0				0	25	0				22.22	37.5	0	0	0	0											8	7.69	0	7.14	7.69			20.51
	pqn-31		11.11	11.11	11.11	11.11	11.11						18.18	10.34	14.2	11.92	15.38	21.21	13.33	12.5	10.71	1.85		17.5			0			0		17.95	0					19.42	0			11.27	18.18	20.83	15.38	0	6.9	3.23	9.52
	Y50E8A.5		6.35	6.35	6.35	5.13	5.19	6.67	0	9.09	10	10	0	16.67						0	0	0		0								7.14	10	0	0	8.33	0	14.29	8.51	13.33	11.76	10.07	6.56	7.32	9.52	10.66	8.77	8.7	8
	C15H9.11		25	0	0	20	20	0	6.25	6.25	0	6.25																				0										16	10	6.9	11.11	17.86	12.5	25	12.05
	F35A5.4		27.22	27.27	27.27	26.4	26.53	5.13	8.86	9.46	10.61	10.29	12.5	14.29					0	15.38	10	0		6.67								4.88	11.11	4.65	7.14	12.5	13.16	4.55	16.18	12	13.46	31.73	16.36	17.22	26.77	32.2	23.7	28.65	26.36
	abf-5		33.33	33.33	33.33	13.33	13.33	0	3.33	0	5.26	5																				16.67	0			6.67	33.33	0	15.38	28.57	18.75	9.09	0	3.57	9.52	6.67	0	11.11	8.2
	C30F2.3		14.55	13.73	13.73	14.49	14.49	9.18	9.26	14.43	9.2	14.61	11.43	10.45	18	10.87	13.04	19.05	10	8.08	10.75	6.12		15.46		7.14	2.63		4.17	3.85	3.85	6.25	0			10	7.69	8.93	13.45	8.77	8.96	9.17	8.47	7.46	4.35	5.41	9.38	9.09	11.28
	abf-6		6.67	6.67	6.67	6.67	6.67	8.7	8.33	10.34	7.14	10.34		3.57	18.64	18.75	26.32	3.57	16.39	12	6.38	10		24.24		11.11	0		7.69	0	0	0	0			7.41	17.65	26.19	10.87	13.04	13.04	14.81	0	6.25	8.33	13.04	23.53	18.75	8.82
	C01G10.15													6.25	28.85	12.77	14.29	4.76	21.21	11.63	4.88	10.71		32.26		7.14	4.17		8	11.76	5.88							50	6.25
	pqn-29		18	18.75	18.75	18.64	18.64	9.48	11.61	11	10.84	14.12	4.35	15.71	22.86	25	31.43	22	25.4	12.35	4.61	5.45		18.1		9.09	11.11		2.86	13.79	13.79	0	12.5		22.22	17.07	9.62	21.82	20.32	9.62	9.68	8.75	11.9	10	6.25	11.48	9.8	5.88	9.2
	fipr-9													19.23	31.03	24	44.44	42.86	35																			11.11	6.25
	fipr-4													15.38	37.93	24	44.44	42.86	40																			11.11	6.25
	fipr-7													19.23	37.93	24	44.44	46.43	40																			11.11	6.25
	fipr-6													15.38	34.48	20	38.89	42.86	40																			11.11	6.25
	fipr-10													15.38	25	25.93	25	44.83	42.86																			11.11	9.38
	fipr-11													23.08	28.57	29.63	25	44.83	42.86																			11.11	12.5
	fipr-1													12	24	20	15	40	37.5																			0	6.67
	fipr-2													8.7	20	20	16.67	33.33	26.32																			0	3.45
[truncated: 59 more columns]
